# Supplementary material for: Role of CD14+ monocyte-derived oxidised mitochondrial DNA in the inflammatory interferon type 1 signature in juvenile dermatomyositis
Source: PubMed Central journal article supplement (PMC10176342; doi:10.1136/ard-2022-223469), 2022-12-23
Supplement: ard-2022-223469supp002.pdf [file ard-2022-223469supp002.pdf]

**Supplementary Table 1 - JDM pre-treatment vs age-matched healthy control significantly DEG ( $p \leq 0.05$ )**

| Ensemble ID     | hgnc_symbol | log fold change | Adjusted p value |
|-----------------|-------------|-----------------|------------------|
| ENSG00000172575 | RASGRP1     | -4.37211198     | 2.24E-24         |
| ENSG00000167286 | CD3D        | -4.666564649    | 1.72E-22         |
| ENSG00000107742 | SPOCK2      | -4.360415147    | 1.72E-22         |
| ENSG00000180096 |             | -2.213826247    | 4.96E-22         |
| ENSG00000198821 | CD247       | -4.212664852    | 6.77E-22         |
| ENSG00000198286 | CARD11      | -3.980638073    | 9.31E-21         |
| ENSG00000211751 | TRBC1       | -4.429073007    | 2.03E-18         |
| ENSG00000111371 | SLC38A1     | -2.385863349    | 2.03E-18         |
| ENSG00000167984 | NLRC3       | -2.851013671    | 2.03E-18         |
| ENSG00000211772 | TRBC2       | -3.848305286    | 4.30E-17         |
| ENSG00000185101 | ANO9        | -4.119222231    | 4.76E-17         |
| ENSG00000182866 | LCK         | -4.062812135    | 5.72E-17         |
| ENSG00000115085 | ZAP70       | -4.147512211    | 9.18E-17         |
| ENSG00000069667 | RORA        | -4.869341336    | 1.04E-16         |
| ENSG00000101096 | NFATC2      | -2.831487036    | 1.35E-16         |
| ENSG00000135127 | BICDL1      | -3.576759892    | 2.62E-16         |
| ENSG00000160185 | UBASH3A     | -4.657218676    | 4.20E-15         |
| ENSG00000172005 | MAL         | -5.377418997    | 6.46E-15         |
| ENSG00000142173 | COL6A2      | -5.335273567    | 9.75E-15         |
| ENSG00000088387 | DOCK9       | -3.222329725    | 1.77E-14         |
| ENSG00000138795 | LEF1        | -4.449435465    | 2.96E-14         |
| ENSG00000099204 | ABLIM1      | -3.584001413    | 5.79E-14         |
| ENSG00000165929 | TC2N        | -4.804614256    | 1.08E-13         |
| ENSG00000113263 | ITK         | -3.192369031    | 1.22E-13         |
| ENSG00000197540 | GZMM        | -3.579783868    | 1.40E-13         |
| ENSG00000198851 | CD3E        | -4.400703314    | 1.89E-13         |
| ENSG00000127152 | BCL11B      | -4.806303961    | 3.23E-13         |
| ENSG00000100385 | IL2RB       | -4.83925198     | 4.29E-13         |
| ENSG00000142303 | ADAMTS10    | -2.457574491    | 4.40E-13         |
| ENSG00000280135 |             | -4.826963634    | 4.98E-13         |
| ENSG00000152495 | CAMK4       | -3.355410449    | 6.37E-13         |
| ENSG00000110448 | CD5         | -3.765399452    | 7.45E-13         |
| ENSG00000111796 | KLRB1       | -5.177955918    | 1.17E-12         |
| ENSG00000139193 | CD27        | -4.160431804    | 1.43E-12         |
| ENSG00000215788 | TNFRSF25    | -2.605278827    | 1.55E-12         |
| ENSG00000141293 | SKAP1       | -3.675465711    | 2.39E-12         |
| ENSG00000277734 | TRAC        | -3.934848077    | 2.57E-12         |
| ENSG00000013725 | CD6         | -3.720643916    | 4.88E-12         |
| ENSG00000081059 | TCF7        | -3.983272099    | 6.34E-12         |
| ENSG00000245164 | LINC00861   | -4.331322342    | 1.19E-11         |
| ENSG00000163519 | TRAT1       | -4.069345096    | 2.49E-11         |
| ENSG00000159753 | CARMIL2     | -2.23931152     | 3.71E-11         |
| ENSG00000067840 | PDZD4       | -4.607733843    | 4.43E-11         |
| ENSG00000162894 | FCMR        | -3.132791023    | 4.83E-11         |

|                 |           |              |          |
|-----------------|-----------|--------------|----------|
| ENSG00000168685 | IL7R      | -4.307669584 | 5.03E-11 |
| ENSG00000146674 | IGFBP3    | -7.787654438 | 5.50E-11 |
| ENSG00000174080 | CTSF      | -2.407169086 | 5.50E-11 |
| ENSG00000175265 | GOLGA8A   | -2.453462265 | 5.50E-11 |
| ENSG00000124181 | PLCG1     | -2.348427418 | 5.64E-11 |
| ENSG00000134954 | ETS1      | -2.08406885  | 5.94E-11 |
| ENSG00000065675 | PRKCQ     | -3.00987945  | 6.44E-11 |
| ENSG00000211829 | TRDC      | -4.777951319 | 4.53E-10 |
| ENSG00000130787 | HIP1R     | -2.935653694 | 5.00E-10 |
| ENSG00000089012 | SIRPG     | -4.022974816 | 6.87E-10 |
| ENSG00000165185 | KIAA1958  | 1.963697048  | 7.68E-10 |
| ENSG00000179639 | FCER1A    | -5.514315116 | 8.07E-10 |
| ENSG00000112182 | BACH2     | -3.006094519 | 9.97E-10 |
| ENSG00000008517 | IL32      | -3.607461402 | 1.04E-09 |
| ENSG00000226950 | DANCR     | -1.844394618 | 1.14E-09 |
| ENSG00000255198 | SNHG9     | -1.584034177 | 1.45E-09 |
| ENSG00000187109 | NAP1L1    | -1.053601182 | 1.46E-09 |
| ENSG00000100346 | CACNA1I   | -4.863194194 | 1.68E-09 |
| ENSG00000079616 | KIF22     | -1.151215826 | 3.09E-09 |
| ENSG00000116106 | EPHA4     | -5.567887063 | 3.15E-09 |
| ENSG00000124203 | ZNF831    | -3.510236283 | 4.43E-09 |
| ENSG00000173208 | ABCD2     | -4.72311326  | 4.46E-09 |
| ENSG00000111674 | ENO2      | -3.196163577 | 6.30E-09 |
| ENSG00000101224 | CDC25B    | -1.129481246 | 7.84E-09 |
| ENSG00000107485 | GATA3     | -3.353634116 | 7.95E-09 |
| ENSG00000055130 | CUL1      | 1.136163256  | 8.91E-09 |
| ENSG00000228903 | RASA4CP   | -1.536207884 | 9.19E-09 |
| ENSG00000116251 | RPL22     | -0.877542988 | 9.87E-09 |
| ENSG00000163359 | COL6A3    | -3.888005371 | 9.96E-09 |
| ENSG00000114942 | EEF1B2    | -0.939459883 | 1.74E-08 |
| ENSG00000027869 | SH2D2A    | -3.852281814 | 1.84E-08 |
| ENSG00000101082 | SLA2      | -2.520074843 | 1.97E-08 |
| ENSG00000184613 | NELL2     | -3.946342491 | 1.97E-08 |
| ENSG00000181847 | TIGIT     | -5.155733666 | 3.11E-08 |
| ENSG00000233355 | CHRM3-AS2 | -3.400645916 | 3.87E-08 |
| ENSG00000107833 | NPM3      | -1.578034237 | 4.14E-08 |
| ENSG00000197635 | DPP4      | -3.733699696 | 4.70E-08 |
| ENSG00000130589 | HELZ2     | 2.2513553    | 5.58E-08 |
| ENSG00000178562 | CD28      | -3.098517385 | 6.00E-08 |
| ENSG00000160710 | ADAR      | 1.215480815  | 6.50E-08 |
| ENSG00000227507 | LTB       | -1.862720539 | 6.84E-08 |
| ENSG00000089009 | RPL6      | -0.748397376 | 9.87E-08 |
| ENSG00000085662 | AKR1B1    | -1.089965676 | 1.10E-07 |
| ENSG00000128739 | SNRPN     | -1.290619576 | 1.25E-07 |
| ENSG00000112514 | CUTA      | -0.756058338 | 1.55E-07 |
| ENSG00000213626 | LBH       | -2.388225632 | 1.67E-07 |
| ENSG00000127586 | CHTF18    | -1.221094486 | 1.72E-07 |
| ENSG00000196705 | ZNF431    | -1.021681712 | 1.84E-07 |

|                 |          |              |          |
|-----------------|----------|--------------|----------|
| ENSG00000149527 | PLCH2    | -3.276347883 | 2.03E-07 |
| ENSG00000115607 | IL18RAP  | -4.42371749  | 2.12E-07 |
| ENSG00000172428 | COPS9    | -0.808347429 | 2.68E-07 |
| ENSG00000160654 | CD3G     | -2.123428048 | 2.92E-07 |
| ENSG00000118922 | KLF12    | -1.513965177 | 2.94E-07 |
| ENSG00000178922 | HYI      | -2.027160481 | 3.36E-07 |
| ENSG00000135960 | EDAR     | -5.309092358 | 3.67E-07 |
| ENSG00000063180 | CA11     | -1.687963992 | 3.87E-07 |
| ENSG00000204475 | NCR3     | -4.61496023  | 4.12E-07 |
| ENSG00000183486 | MX2      | 2.118433822  | 4.12E-07 |
| ENSG00000137970 | RPL7P9   | -0.916475831 | 4.21E-07 |
| ENSG00000224877 | NDUF8    | -1.514406584 | 4.21E-07 |
| ENSG00000227008 |          | -1.349140593 | 4.41E-07 |
| ENSG00000198034 | RPS4X    | -0.787257334 | 4.53E-07 |
| ENSG00000220205 | VAMP2    | -0.865276062 | 4.53E-07 |
| ENSG00000162910 | MRPL55   | -0.98446521  | 4.65E-07 |
| ENSG00000172673 | THEMIS   | -2.612768154 | 5.50E-07 |
| ENSG00000144741 | SLC25A26 | -0.937348354 | 5.73E-07 |
| ENSG00000105369 | CD79A    | -2.533950726 | 5.73E-07 |
| ENSG00000211747 | TRBV20-1 | -5.001990395 | 6.45E-07 |
| ENSG00000178429 | RPS3AP5  | -1.119313459 | 6.65E-07 |
| ENSG00000153283 | CD96     | -3.718072664 | 6.94E-07 |
| ENSG00000169116 | PARM1    | -3.833469332 | 6.99E-07 |
| ENSG00000141542 | RAB40B   | -1.584822227 | 7.12E-07 |
| ENSG00000136816 | TOR1B    | 1.661466843  | 7.14E-07 |
| ENSG00000167792 | NDUFV1   | -0.748355878 | 7.57E-07 |
| ENSG00000105808 | RASA4    | -1.51149014  | 7.68E-07 |
| ENSG00000255026 |          | -3.923439409 | 8.16E-07 |
| ENSG00000204252 | HLA-DOA  | -2.090582557 | 8.20E-07 |
| ENSG00000157778 | PSMG3    | -0.957103712 | 9.02E-07 |
| ENSG00000178982 | EIF3K    | -0.707875815 | 9.42E-07 |
| ENSG00000113319 | RASGRF2  | -3.131596639 | 9.46E-07 |
| ENSG00000109452 | INPP4B   | -2.808950053 | 9.80E-07 |
| ENSG00000186468 | RPS23    | -0.801626846 | 1.06E-06 |
| ENSG00000114023 | FAM162A  | -1.070150643 | 1.12E-06 |
| ENSG00000170486 | KRT72    | -4.804621154 | 1.15E-06 |
| ENSG00000249115 | HAUS5    | -0.900095482 | 1.24E-06 |
| ENSG00000146285 | SCML4    | -2.5735471   | 1.29E-06 |
| ENSG00000156110 | ADK      | -1.426476686 | 1.36E-06 |
| ENSG00000055332 | EIF2AK2  | 1.922776604  | 1.37E-06 |
| ENSG00000151612 | ZNF827   | -3.605420689 | 1.44E-06 |
| ENSG00000224078 | SNHG14   | -1.307941758 | 1.48E-06 |
| ENSG00000161405 | IKZF3    | -1.575632044 | 1.58E-06 |
| ENSG00000143947 | RPS27A   | -0.835493668 | 1.71E-06 |
| ENSG00000138035 | PNPT1    | 1.755181454  | 1.78E-06 |
| ENSG00000169583 | CLIC3    | -5.395727002 | 1.93E-06 |
| ENSG00000172366 | MCRIP2   | -1.306734612 | 2.31E-06 |
| ENSG00000260314 | MRC1     | -2.728732538 | 2.38E-06 |

|                 |          |              |          |
|-----------------|----------|--------------|----------|
| ENSG00000122406 | RPL5     | -0.740590485 | 2.44E-06 |
| ENSG00000165272 | AQP3     | -3.260598656 | 2.49E-06 |
| ENSG00000116824 | CD2      | -1.501793069 | 2.74E-06 |
| ENSG00000168913 | ENHO     | -2.311462504 | 2.76E-06 |
| ENSG00000262049 |          | -1.147766491 | 2.76E-06 |
| ENSG00000188157 | AGRN     | 2.326251896  | 3.05E-06 |
| ENSG00000142168 | SOD1     | -0.685890108 | 3.05E-06 |
| ENSG00000135736 | CCDC102A | -4.883665353 | 3.28E-06 |
| ENSG00000132274 | TRIM22   | 1.370483686  | 3.34E-06 |
| ENSG00000198780 | FAM169A  | -3.813724924 | 3.46E-06 |
| ENSG00000172508 | CARNS1   | -3.055639748 | 3.54E-06 |
| ENSG00000076685 | NT5C2    | 0.770884796  | 3.55E-06 |
| ENSG00000126756 | UXT      | -0.744742703 | 3.63E-06 |
| ENSG00000166889 | PATL1    | 1.091549368  | 3.66E-06 |
| ENSG00000106628 | POLD2    | -1.06206495  | 3.72E-06 |
| ENSG00000188186 | LAMTOR4  | -0.916393548 | 3.72E-06 |
| ENSG00000135919 | SERPINE2 | -3.558353077 | 3.76E-06 |
| ENSG00000278133 |          | -0.932403977 | 3.94E-06 |
| ENSG00000117419 | ERI3     | -0.721420156 | 4.50E-06 |
| ENSG00000124201 | ZNFX1    | 1.267927481  | 4.50E-06 |
| ENSG00000078596 | ITM2A    | -2.477412718 | 4.59E-06 |
| ENSG00000132704 | FCRL2    | -2.799716883 | 4.89E-06 |
| ENSG00000188322 | SBK1     | -2.399130703 | 4.89E-06 |
| ENSG00000105373 | GLTSCR2  | -0.898508387 | 4.99E-06 |
| ENSG00000126353 | CCR7     | -2.679354515 | 5.00E-06 |
| ENSG00000174917 | C19orf70 | -0.871664951 | 5.25E-06 |
| ENSG00000034053 | APBA2    | -2.53295175  | 5.27E-06 |
| ENSG00000235162 | C12orf75 | -2.973063118 | 5.51E-06 |
| ENSG00000142937 | RPS8     | -0.817559569 | 5.53E-06 |
| ENSG00000153107 | ANAPC1   | -0.64329563  | 5.83E-06 |
| ENSG00000213609 | RPL7AP50 | -1.845605555 | 6.32E-06 |
| ENSG00000136573 | BLK      | -3.314176969 | 6.53E-06 |
| ENSG00000185885 | IFITM1   | 2.444848625  | 6.71E-06 |
| ENSG00000115604 | IL18R1   | -3.674621514 | 6.90E-06 |
| ENSG00000232869 | TRBV29-1 | -4.319513882 | 7.00E-06 |
| ENSG00000147604 | RPL7     | -0.762630505 | 7.98E-06 |
| ENSG00000137200 | CMTR1    | 1.045635766  | 8.03E-06 |
| ENSG00000173193 | PARP14   | 1.73485482   | 8.53E-06 |
| ENSG00000188785 | ZNF548   | -1.066082348 | 8.79E-06 |
| ENSG00000106624 | AEBP1    | -2.950264749 | 9.39E-06 |
| ENSG00000102245 | CD40LG   | -4.01657469  | 9.42E-06 |
| ENSG00000271109 |          | -3.797923107 | 9.42E-06 |
| ENSG00000197180 |          | -1.555610547 | 1.01E-05 |
| ENSG00000007255 | TRAPPC6A | -1.159126999 | 1.02E-05 |
| ENSG00000117298 | ECE1     | 1.020685313  | 1.07E-05 |
| ENSG00000073861 | TBX21    | -3.363953663 | 1.08E-05 |
| ENSG00000182774 | RPS17    | -0.762953277 | 1.09E-05 |
| ENSG00000100836 | PABPN1   | -0.637710325 | 1.16E-05 |

|                 |          |              |          |
|-----------------|----------|--------------|----------|
| ENSG00000186395 | KRT10    | -0.970691422 | 1.17E-05 |
| ENSG00000232442 |          | -1.609582123 | 1.18E-05 |
| ENSG00000137154 | RPS6     | -0.712467915 | 1.18E-05 |
| ENSG00000167106 | FAM102A  | -1.30879207  | 1.18E-05 |
| ENSG00000119922 | IFIT2    | 3.752091831  | 1.18E-05 |
| ENSG00000160856 | FCRL3    | -2.978467614 | 1.24E-05 |
| ENSG00000099622 | CIRBP    | -0.657377765 | 1.24E-05 |
| ENSG00000188243 | COMMD6   | -0.655725038 | 1.24E-05 |
| ENSG00000237702 | TRBV3-1  | -4.213118599 | 1.28E-05 |
| ENSG00000186567 | CEACAM19 | -1.770816673 | 1.28E-05 |
| ENSG00000185697 | MYBL1    | -2.32613539  | 1.30E-05 |
| ENSG00000100316 | RPL3     | -0.705990222 | 1.34E-05 |
| ENSG00000279865 |          | -1.312120358 | 1.41E-05 |
| ENSG00000174444 | RPL4     | -0.662627634 | 1.41E-05 |
| ENSG00000100814 | CCNB1IP1 | -0.811013886 | 1.43E-05 |
| ENSG00000180644 | PRF1     | -3.423921806 | 1.47E-05 |
| ENSG00000089157 | RPLP0    | -0.733627731 | 1.47E-05 |
| ENSG00000163600 | ICOS     | -2.73399507  | 1.48E-05 |
| ENSG00000204580 | DDR1     | -1.78061951  | 1.61E-05 |
| ENSG00000178035 | IMPDH2   | -1.092394288 | 1.62E-05 |
| ENSG00000090266 | NDUFB2   | -0.839182412 | 1.62E-05 |
| ENSG00000021300 | PLEKHB1  | -2.525709748 | 1.63E-05 |
| ENSG00000105202 | FBL      | -0.625597097 | 1.63E-05 |
| ENSG00000211896 | IGHG1    | -4.268185717 | 1.66E-05 |
| ENSG00000072858 | SIDT1    | -1.381490694 | 1.73E-05 |
| ENSG00000145649 | GZMA     | -3.776231117 | 1.73E-05 |
| ENSG00000100351 | GRAP2    | -1.973045386 | 1.94E-05 |
| ENSG00000263731 |          | -1.264369828 | 1.95E-05 |
| ENSG00000114127 | XRN1     | 0.867428862  | 1.99E-05 |
| ENSG00000205413 | SAMD9    | 2.377337732  | 1.99E-05 |
| ENSG00000198467 | TPM2     | -1.528219096 | 2.01E-05 |
| ENSG00000196531 | NACA     | -0.570138659 | 2.01E-05 |
| ENSG00000168028 | RPSA     | -0.753447691 | 2.06E-05 |
| ENSG00000134321 | RSAD2    | 3.564939193  | 2.21E-05 |
| ENSG00000244968 | LIFR-AS1 | 3.624087319  | 2.31E-05 |
| ENSG00000145425 | RPS3A    | -0.801073471 | 2.50E-05 |
| ENSG00000102921 | N4BP1    | 1.093827658  | 2.50E-05 |
| ENSG00000083845 | RPS5     | -0.834016354 | 2.74E-05 |
| ENSG00000232573 | RPL3P4   | -0.932267398 | 2.82E-05 |
| ENSG00000173114 | LRRN3    | -3.644425747 | 2.84E-05 |
| ENSG00000225200 |          | -1.295341307 | 2.88E-05 |
| ENSG00000211897 | IGHG3    | -5.163121427 | 3.05E-05 |
| ENSG00000166016 | ABTB2    | 3.448181273  | 3.05E-05 |
| ENSG00000168813 | ZNF507   | -1.327248828 | 3.05E-05 |
| ENSG00000110717 | NDUFS8   | -0.717896287 | 3.29E-05 |
| ENSG00000269892 |          | -1.847138793 | 3.29E-05 |
| ENSG00000214485 | RPL7P1   | -1.260392854 | 3.40E-05 |
| ENSG00000162585 | FAAP20   | -0.74898593  | 3.45E-05 |

|                 |             |              |          |
|-----------------|-------------|--------------|----------|
| ENSG00000111716 | LDHB        | -0.844356557 | 3.50E-05 |
| ENSG00000173436 | MINOS1      | -0.771644993 | 3.57E-05 |
| ENSG00000174748 | RPL15       | -0.556475452 | 3.57E-05 |
| ENSG00000148303 | RPL7A       | -0.661606989 | 3.57E-05 |
| ENSG00000181754 | AMIGO1      | -2.495577933 | 3.63E-05 |
| ENSG00000198755 | RPL10A      | -0.692288949 | 3.75E-05 |
| ENSG00000089220 | PEBP1       | -0.806614569 | 3.90E-05 |
| ENSG00000140464 | PML         | 1.133861417  | 3.90E-05 |
| ENSG00000198932 | GPRASP1     | -1.831353092 | 4.18E-05 |
| ENSG00000169567 | HINT1       | -0.574863325 | 4.34E-05 |
| ENSG00000108821 | COL1A1      | -5.660872721 | 4.35E-05 |
| ENSG00000153933 | DGKE        | -1.000084265 | 4.36E-05 |
| ENSG00000269911 |             | -4.60673373  | 4.39E-05 |
| ENSG00000173821 | RNF213      | 1.400489637  | 4.54E-05 |
| ENSG00000141664 | ZCCHC2      | 1.437673678  | 4.63E-05 |
| ENSG00000170989 | S1PR1       | -2.303846168 | 4.73E-05 |
| ENSG00000228956 | SATB1-AS1   | -2.179636384 | 4.74E-05 |
| ENSG00000005448 | WDR54       | -1.225430467 | 4.75E-05 |
| ENSG00000114391 | RPL24       | -0.645439042 | 4.89E-05 |
| ENSG00000137628 | DDX60       | 2.140555487  | 4.99E-05 |
| ENSG00000104490 | NCALD       | -2.941458087 | 4.99E-05 |
| ENSG00000078589 | P2RY10      | -2.578006789 | 5.12E-05 |
| ENSG00000124256 | ZBP1        | 2.313964477  | 5.12E-05 |
| ENSG00000160075 | SSU72       | -0.490398411 | 5.33E-05 |
| ENSG00000127184 | COX7C       | -0.591688198 | 5.50E-05 |
| ENSG00000175061 | LRRC75A-AS1 | -0.712997209 | 5.70E-05 |
| ENSG00000187514 | PTMA        | -0.66370439  | 5.74E-05 |
| ENSG00000164692 | COL1A2      | -5.311908165 | 5.74E-05 |
| ENSG00000107201 | DDX58       | 1.948164449  | 5.74E-05 |
| ENSG00000247774 | PCED1B-AS1  | -1.138208676 | 5.74E-05 |
| ENSG00000124172 | ATP5E       | -0.564331315 | 5.74E-05 |
| ENSG00000184979 | USP18       | 3.862304262  | 5.74E-05 |
| ENSG00000232112 | TMA7        | -0.607479602 | 6.26E-05 |
| ENSG00000183691 | NOG         | -3.790342064 | 6.33E-05 |
| ENSG00000157570 | TSPAN18     | -3.930782241 | 6.38E-05 |
| ENSG00000054654 | SYNE2       | -1.438675458 | 6.38E-05 |
| ENSG00000163682 | RPL9        | -0.837035041 | 6.56E-05 |
| ENSG00000137078 | SIT1        | -3.410523475 | 6.70E-05 |
| ENSG00000100453 | GZMB        | -3.48671265  | 7.07E-05 |
| ENSG00000138646 | HERC5       | 2.73760257   | 7.23E-05 |
| ENSG00000268205 |             | -0.947871769 | 7.25E-05 |
| ENSG00000167526 | RPL13       | -0.838321988 | 7.45E-05 |
| ENSG00000168118 | RAB4A       | -0.570659018 | 8.24E-05 |
| ENSG00000198934 | MAGEE1      | -4.44609927  | 8.30E-05 |
| ENSG00000107223 | EDF1        | -0.640913802 | 8.32E-05 |
| ENSG00000109475 | RPL34       | -0.774306329 | 8.49E-05 |
| ENSG00000123349 | PFDN5       | -0.650102849 | 8.60E-05 |
| ENSG00000269293 | ZSCAN16-AS1 | -0.895664556 | 8.93E-05 |

|                 |           |              |             |
|-----------------|-----------|--------------|-------------|
| ENSG00000147123 | NDUFB11   | -0.704269437 | 8.93E-05    |
| ENSG00000175854 | SWI5      | -0.989809919 | 9.57E-05    |
| ENSG00000111912 | NCOA7     | 1.315900313  | 9.87E-05    |
| ENSG00000102030 | NAA10     | -0.832584601 | 1.00E-04    |
| ENSG00000115267 | IFIH1     | 1.787770848  | 0.000101806 |
| ENSG00000280237 | MIR4697HG | -4.082282477 | 0.000103373 |
| ENSG00000213904 | LIPE-AS1  | -1.310858245 | 0.000103724 |
| ENSG00000132185 | FCRLA     | -3.311934728 | 0.000104026 |
| ENSG00000237943 | PRKCQ-AS1 | -1.856660035 | 0.000104932 |
| ENSG00000213139 | CRYGS     | -1.280665004 | 0.000105641 |
| ENSG00000259959 |           | -1.394450458 | 0.000105641 |
| ENSG00000168646 | AXIN2     | -4.548723571 | 0.000105641 |
| ENSG00000163520 | FBLN2     | -2.726185674 | 0.000105795 |
| ENSG00000111331 | OAS3      | 2.922369795  | 0.000106087 |
| ENSG00000172432 | GTPBP2    | 0.835450041  | 0.000108081 |
| ENSG00000196683 | TOMM7     | -0.829828497 | 0.00010827  |
| ENSG00000104529 | EEF1D     | -0.58691008  | 0.000111495 |
| ENSG00000165138 | ANKS6     | -1.514079768 | 0.000111495 |
| ENSG00000213862 |           | -0.801439697 | 0.000111495 |
| ENSG00000105699 | LSR       | -3.418783114 | 0.000111731 |
| ENSG00000155366 | RHOC      | -1.637991254 | 0.000114139 |
| ENSG00000174500 | GCSAM     | -3.917508071 | 0.000114179 |
| ENSG00000280120 |           | -1.261390784 | 0.000114214 |
| ENSG00000100027 | YPEL1     | -1.703045367 | 0.000114214 |
| ENSG00000157601 | MX1       | 2.59560948   | 0.000114214 |
| ENSG00000113088 | GZMK      | -3.822962222 | 0.00011818  |
| ENSG00000274383 |           | -1.542970616 | 0.000120276 |
| ENSG00000161970 | RPL26     | -0.715400108 | 0.000130254 |
| ENSG00000164615 | CAMLG     | -0.629958807 | 0.000130772 |
| ENSG00000065717 | TLE2      | -3.347003756 | 0.000131315 |
| ENSG00000167747 | C19orf48  | -1.049405836 | 0.000132886 |
| ENSG00000182004 | SNRPE     | -0.713832565 | 0.000136285 |
| ENSG00000172943 | PHF8      | 0.538152116  | 0.000136865 |
| ENSG00000139537 | CCDC65    | -4.443297198 | 0.000141543 |
| ENSG00000122026 | RPL21     | -0.723086137 | 0.000141632 |
| ENSG00000130332 | LSM7      | -0.746420001 | 0.000147483 |
| ENSG00000133112 | TPT1      | -0.658410948 | 0.000148679 |
| ENSG00000231113 |           | -0.7788648   | 0.000151269 |
| ENSG00000185163 | DDX51     | -0.687193113 | 0.000158872 |
| ENSG00000134326 | CMPK2     | 2.977159049  | 0.000159499 |
| ENSG00000169884 | WNT10B    | -2.333576677 | 0.000159516 |
| ENSG00000102878 | HSF4      | -1.147820473 | 0.000159808 |
| ENSG00000133065 | SLC41A1   | -0.89957492  | 0.000163039 |
| ENSG00000183648 | NDUFB1    | -0.728642114 | 0.000163039 |
| ENSG00000154764 | WNT7A     | -4.449363065 | 0.000165811 |
| ENSG00000236778 | INTS6-AS1 | -1.077927255 | 0.000185365 |
| ENSG00000260807 |           | -3.673407639 | 0.000185618 |
| ENSG00000099624 | ATP5D     | -0.832580335 | 0.000188578 |

|                 |           |              |             |
|-----------------|-----------|--------------|-------------|
| ENSG00000145912 | NHP2      | -0.773872402 | 0.000192316 |
| ENSG00000168824 |           | -3.494911903 | 0.000197172 |
| ENSG00000204628 | RACK1     | -0.537567004 | 0.000197172 |
| ENSG00000104907 | TRMT1     | -0.73790355  | 0.000209028 |
| ENSG00000237550 | RPL9P9    | -0.746466662 | 0.000219689 |
| ENSG00000213015 | ZNF580    | -0.888078276 | 0.000223953 |
| ENSG00000172663 | TMEM134   | -0.797327479 | 0.000232242 |
| ENSG00000270189 |           | -1.463036366 | 0.000238693 |
| ENSG00000183918 | SH2D1A    | -2.864633564 | 0.000238693 |
| ENSG00000174886 | NDUFA11   | -1.04574285  | 0.000238693 |
| ENSG00000269044 |           | -1.037537922 | 0.000238693 |
| ENSG00000108679 | LGALS3BP  | 2.291162548  | 0.000241285 |
| ENSG00000172878 | METAP1D   | -1.448666428 | 0.000241285 |
| ENSG00000111907 | TPD52L1   | 2.690874455  | 0.000248813 |
| ENSG00000105939 | ZC3HAV1   | 0.933584465  | 0.000251153 |
| ENSG00000155265 | GOLGA7B   | -3.06933314  | 0.000262446 |
| ENSG00000105427 | CNFN      | -2.164900281 | 0.00026337  |
| ENSG00000167799 | NUDT8     | -1.956469458 | 0.000267099 |
| ENSG00000213757 |           | -1.127686732 | 0.000267232 |
| ENSG00000102471 | NDFIP2    | -3.956319941 | 0.000280208 |
| ENSG00000184990 | SIVA1     | -0.726001441 | 0.000286118 |
| ENSG00000147804 | SLC39A4   | -1.101649423 | 0.000286208 |
| ENSG00000234797 | RPS3AP6   | -0.778314029 | 0.000290261 |
| ENSG00000106355 | LSM5      | -0.689110229 | 0.000305367 |
| ENSG00000167283 | ATP5L     | -0.496159342 | 0.000305367 |
| ENSG00000214548 | MEG3      | -3.07822972  | 0.000307298 |
| ENSG00000235552 | RPL6P27   | -0.861926108 | 0.000307298 |
| ENSG00000278030 | TRBV7-9   | -4.25691186  | 0.000307447 |
| ENSG00000211749 | TRBV23-1  | -4.263401984 | 0.000309205 |
| ENSG00000174946 | GPR171    | -3.539090325 | 0.00031141  |
| ENSG00000158321 | AUTS2     | -2.087307202 | 0.00031141  |
| ENSG00000148516 | ZEB1      | -2.393228406 | 0.000314244 |
| ENSG00000067066 | SP100     | 0.896173461  | 0.000316288 |
| ENSG00000105193 | RPS16     | -0.672198552 | 0.000324618 |
| ENSG00000241837 | ATP5O     | -0.613730551 | 0.000329148 |
| ENSG00000221983 | UBA52     | -0.599121868 | 0.000329169 |
| ENSG00000140391 | TSPAN3    | -1.060016498 | 0.000334674 |
| ENSG00000156411 | C14orf2   | -0.615265546 | 0.000336796 |
| ENSG00000007264 | MATK      | -2.859583582 | 0.000339424 |
| ENSG00000162244 | RPL29     | -0.673454697 | 0.000347712 |
| ENSG00000130635 | COL5A1    | -3.550996646 | 0.000352748 |
| ENSG00000212694 | LINC01089 | -1.197254106 | 0.000352748 |
| ENSG00000160226 | C21orf2   | -1.088532364 | 0.000360717 |
| ENSG00000101596 | SMCHD1    | 0.931369794  | 0.000360786 |
| ENSG00000156467 | UQCRB     | -0.645589241 | 0.000361718 |
| ENSG00000164483 | SAMD3     | -2.564111255 | 0.000362078 |
| ENSG00000115155 | OTOF      | 7.186284502  | 0.000364835 |
| ENSG00000148362 | C9orf142  | -0.847290552 | 0.000365754 |



|                 |            |              |             |
|-----------------|------------|--------------|-------------|
| ENSG00000103266 | STUB1      | -0.588735726 | 0.000365782 |
| ENSG00000248275 | TRIM52-AS1 | -0.964355792 | 0.000369752 |
| ENSG00000110700 | RPS13      | -0.622623297 | 0.000374754 |
| ENSG00000180530 | NRIP1      | 1.351034401  | 0.000376561 |
| ENSG00000163534 | FCRL1      | -2.617711203 | 0.000377729 |
| ENSG00000211677 | IGLC2      | -3.642816904 | 0.000378943 |
| ENSG00000117322 | CR2        | -2.515040768 | 0.000380931 |
| ENSG00000204922 | UQCC3      | -1.013559247 | 0.000383374 |
| ENSG00000240509 | RPL34P18   | -1.494481611 | 0.000387277 |
| ENSG00000162227 | TAF6L      | -0.827682662 | 0.000398126 |
| ENSG00000152778 | IFIT5      | 2.080060897  | 0.000403181 |
| ENSG00000166428 | PLD4       | -2.205792302 | 0.000407427 |
| ENSG00000186049 | KRT73      | -3.932644419 | 0.00041245  |
| ENSG00000144218 | AFF3       | -1.392336948 | 0.000416883 |
| ENSG00000112306 | RPS12      | -0.703565345 | 0.000419577 |
| ENSG00000163820 | FYCO1      | 0.809399307  | 0.000423912 |
| ENSG00000137198 | GMPR       | 3.072909968  | 0.000431438 |
| ENSG00000172183 | ISG20      | 1.501926779  | 0.000431438 |
| ENSG00000156873 | PHKG2      | -0.586125261 | 0.0004467   |
| ENSG00000138642 | HERC6      | 2.011489193  | 0.000453786 |
| ENSG00000153563 | CD8A       | -3.217171453 | 0.000462698 |
| ENSG00000198087 | CD2AP      | 1.153941069  | 0.000471446 |
| ENSG00000189227 | C15orf61   | -0.916327124 | 0.000482372 |
| ENSG00000135426 | TESPA1     | -1.379724059 | 0.000488308 |
| ENSG00000136942 | RPL35      | -0.690777745 | 0.000488637 |
| ENSG00000276136 |            | -1.561701407 | 0.000488637 |
| ENSG00000128185 | DGCR6L     | -0.869029126 | 0.000492227 |
| ENSG00000213553 | RPLP0P6    | -0.732793466 | 0.000500474 |
| ENSG00000172116 | CD8B       | -2.758943834 | 0.000501998 |
| ENSG00000168002 | POLR2G     | -0.55077571  | 0.000501998 |
| ENSG00000117691 | NENF       | -0.912177248 | 0.000502636 |
| ENSG00000197756 | RPL37A     | -0.68148802  | 0.000502636 |
| ENSG00000204257 | HLA-DMA    | -1.149520954 | 0.000502636 |
| ENSG00000225964 | NRIR       | 3.248312012  | 0.000508147 |
| ENSG00000005075 | POLR2J     | -0.660280637 | 0.000508147 |
| ENSG00000162614 | NEXN       | 2.732093552  | 0.000512538 |
| ENSG00000141698 | NT5C3B     | -1.203616145 | 0.00051257  |
| ENSG00000256338 | RPL41P2    | -1.490949053 | 0.000531511 |
| ENSG00000161381 | PLXDC1     | -1.793972135 | 0.000532809 |
| ENSG00000111335 | OAS2       | 2.436463858  | 0.000537786 |
| ENSG00000099385 | BCL7C      | -0.660592553 | 0.000545778 |
| ENSG00000104814 | MAP4K1     | -0.858644073 | 0.000551874 |
| ENSG00000198168 | SVIP       | -1.080144347 | 0.000552879 |
| ENSG00000130731 | METTL26    | -0.897489836 | 0.000559458 |
| ENSG00000185920 | PTCH1      | -2.347887924 | 0.000580108 |
| ENSG00000211679 | IGLC3      | -3.788516443 | 0.000584189 |
| ENSG00000164442 | CITED2     | 1.083600372  | 0.000585482 |
| ENSG00000197696 | NMB        | -1.362725379 | 0.000593211 |

|                 |           |              |             |
|-----------------|-----------|--------------|-------------|
| ENSG00000274307 |           | 1.616351746  | 0.000603422 |
| ENSG00000235621 | LINC00494 | -4.274984155 | 0.000603422 |
| ENSG00000181163 | NPM1      | -0.601003416 | 0.000639249 |
| ENSG00000272034 | SNORD14A  | -1.193770842 | 0.000653186 |
| ENSG00000225828 | FAM229A   | -0.830548392 | 0.000657598 |
| ENSG00000137441 | FGFBP2    | -3.790425572 | 0.00065815  |
| ENSG00000175390 | EIF3F     | -0.52428776  | 0.000659607 |
| ENSG00000125743 | SNRPD2    | -0.526163585 | 0.000659607 |
| ENSG00000076554 | TPD52     | -1.722912955 | 0.000679518 |
| ENSG00000042088 | TDP1      | -0.598070112 | 0.0006851   |
| ENSG00000137959 | IFI44L    | 3.262678279  | 0.000694365 |
| ENSG00000103024 | NME3      | -1.112249155 | 0.000694365 |
| ENSG00000214253 | FIS1      | -0.573966318 | 0.000698112 |
| ENSG00000239569 | KMT2E-AS1 | -0.986097199 | 0.000698112 |
| ENSG00000115239 | ASB3      | -0.691984058 | 0.000708812 |
| ENSG00000123144 | C19orf43  | -0.601773846 | 0.000714047 |
| ENSG00000002549 | LAP3      | 1.527329536  | 0.000734181 |
| ENSG00000166405 | RIC3      | -1.953717093 | 0.000734181 |
| ENSG00000156738 | MS4A1     | -2.687154081 | 0.000734181 |
| ENSG00000178449 | COX14     | -0.790579915 | 0.000734181 |
| ENSG00000082458 | DLG3      | -3.029361896 | 0.000735233 |
| ENSG00000229677 |           | 2.37648562   | 0.000740348 |
| ENSG00000229833 | PET100    | -0.833837555 | 0.000788199 |
| ENSG00000273271 |           | -1.13364832  | 0.000788199 |
| ENSG00000130520 | LSM4      | -0.698924172 | 0.000789245 |
| ENSG00000272990 |           | -1.594571719 | 0.000792484 |
| ENSG00000211789 | TRAV12-2  | -3.449639215 | 0.000796876 |
| ENSG00000122224 | LY9       | -1.779083331 | 0.00080638  |
| ENSG00000137818 | RPLP1     | -0.689717968 | 0.00080638  |
| ENSG00000230124 | ACBD6     | -0.56347087  | 0.000809756 |
| ENSG00000176533 | GNG7      | -1.254440406 | 0.000809756 |
| ENSG00000268836 |           | -2.221562663 | 0.000835904 |
| ENSG00000059378 | PARP12    | 1.067986187  | 0.000839654 |
| ENSG00000170542 | SERPINB9  | 1.265338028  | 0.000839834 |
| ENSG00000008988 | RPS20     | -0.62137657  | 0.000845933 |
| ENSG00000198816 | ZNF358    | -1.02355722  | 0.000845933 |
| ENSG00000232788 |           | -1.903169505 | 0.000850641 |
| ENSG00000172053 | QARS      | -0.433830254 | 0.000851892 |
| ENSG00000174915 | PTDSS2    | -0.581039639 | 0.000851892 |
| ENSG00000174171 |           | -2.84227074  | 0.000851892 |
| ENSG00000134419 | RPS15A    | -0.597579856 | 0.000851892 |
| ENSG00000198931 | APRT      | -0.698983586 | 0.000851892 |
| ENSG00000244398 |           | -0.728765348 | 0.000853682 |
| ENSG00000028116 | VRK2      | 0.916992924  | 0.00085393  |
| ENSG00000169976 | SF3B5     | -0.566241373 | 0.000857732 |
| ENSG00000171159 | C9orf16   | -0.723287904 | 0.000869224 |
| ENSG00000206190 | ATP10A    | 1.778549959  | 0.000877263 |
| ENSG00000167113 | COQ4      | -0.819426269 | 0.000895068 |

|                 |           |              |             |
|-----------------|-----------|--------------|-------------|
| ENSG00000166289 | PLEKHF1   | -2.423207789 | 0.000895068 |
| ENSG00000186854 | TRABD2A   | -1.505448806 | 0.000896599 |
| ENSG00000101298 | SNPH      | -2.019688124 | 0.000896599 |
| ENSG00000171858 | RPS21     | -0.733252591 | 0.000906927 |
| ENSG00000117859 | OSBPL9    | 0.671279343  | 0.000915519 |
| ENSG00000181381 | DDX60L    | 1.480272687  | 0.000925248 |
| ENSG00000226287 | TMEM191A  | -1.398998211 | 0.000925248 |
| ENSG00000007392 | LUC7L     | -0.623415398 | 0.000930727 |
| ENSG00000278942 |           | -4.04277027  | 0.000932838 |
| ENSG00000274752 | TRBV12-3  | -4.062410555 | 0.000936739 |
| ENSG00000143793 | C1orf35   | -0.81751732  | 0.000944431 |
| ENSG00000111224 | PARP11    | 0.981807815  | 0.00094515  |
| ENSG00000120915 | EPHX2     | -2.782795904 | 0.000945858 |
| ENSG00000139343 | SNRPF     | -0.622475292 | 0.000945858 |
| ENSG00000272256 |           | -1.282807815 | 0.000947051 |
| ENSG00000226660 | TRBV2     | -4.050964885 | 0.000950942 |
| ENSG00000197111 | PCBP2     | -0.510434783 | 0.000950942 |
| ENSG00000063177 | RPL18     | -0.629860584 | 0.000950942 |
| ENSG00000244313 |           | -0.726036477 | 0.000951188 |
| ENSG00000272579 |           | -1.283930549 | 0.000955848 |
| ENSG00000262528 |           | -1.513211868 | 0.000964192 |
| ENSG00000145016 | RUBCN     | 0.692873429  | 0.000974716 |
| ENSG00000092098 | RNF31     | 0.817304263  | 0.000980019 |
| ENSG00000211949 | IGHV3-23  | -3.661538369 | 0.000981957 |
| ENSG00000133106 | EPST11    | 2.03174243   | 0.000995216 |
| ENSG00000141759 | TXNL4A    | -0.540128229 | 0.001014911 |
| ENSG00000147403 | RPL10     | -0.620919688 | 0.001027031 |
| ENSG00000166136 | NDUFB8    | -0.595560865 | 0.001048067 |
| ENSG00000186010 | NDUFA13   | -0.763046639 | 0.001048067 |
| ENSG00000100353 | EIF3D     | -0.370004705 | 0.001048067 |
| ENSG00000161016 | RPL8      | -0.58028892  | 0.001048281 |
| ENSG00000241351 | IGKV3-11  | -3.814088215 | 0.001065742 |
| ENSG00000105402 | NAPA      | 0.89282043   | 0.001066532 |
| ENSG00000142541 | RPL13A    | -0.58764181  | 0.001066532 |
| ENSG00000245910 | SNHG6     | -0.615873018 | 0.001074624 |
| ENSG00000211655 | IGLV1-36  | -3.925276528 | 0.001093393 |
| ENSG00000205307 | SAP25     | -1.34213169  | 0.001094842 |
| ENSG00000099797 | TECR      | -0.791804103 | 0.001095487 |
| ENSG00000155313 | USP25     | 0.705780993  | 0.001095487 |
| ENSG00000100129 | EIF3L     | -0.647889814 | 0.001105604 |
| ENSG00000224094 | RPS24P8   | -0.845518034 | 0.001110634 |
| ENSG00000227678 |           | -4.069594174 | 0.001110634 |
| ENSG00000121060 | TRIM25    | 1.051969862  | 0.001112355 |
| ENSG00000145494 | NDUFS6    | -0.838805501 | 0.001122967 |
| ENSG00000242299 |           | -0.853538668 | 0.001137483 |
| ENSG00000246898 | LINC00920 | -1.973204412 | 0.001137483 |
| ENSG00000054148 | PHPT1     | -0.936621982 | 0.001139699 |
| ENSG00000264608 |           | -1.105491679 | 0.001179681 |

|                 |          |              |             |
|-----------------|----------|--------------|-------------|
| ENSG00000130748 | TMEM160  | -1.256579576 | 0.001182756 |
| ENSG00000143727 | ACP1     | -0.490573907 | 0.001184478 |
| ENSG00000187051 | RPS19BP1 | -0.659686861 | 0.001184478 |
| ENSG00000152558 | TMEM123  | 1.156386842  | 0.00120837  |
| ENSG00000237886 | NALT1    | -1.376118894 | 0.001230807 |
| ENSG00000188878 | FBF1     | -1.113251078 | 0.001277927 |
| ENSG00000223865 | HLA-DPB1 | -1.455681856 | 0.001294508 |
| ENSG00000273361 |          | -1.249836565 | 0.001302778 |
| ENSG00000180354 | MTURN    | -0.956829225 | 0.001319483 |
| ENSG00000211694 | TRGV10   | -4.059447193 | 0.00131964  |
| ENSG00000115523 | GNLY     | -3.205977592 | 0.001323716 |
| ENSG00000165821 | SALL2    | -4.057857259 | 0.001332566 |
| ENSG00000109686 | SH3D19   | -3.056590787 | 0.001353039 |
| ENSG00000149273 | RPS3     | -0.632249355 | 0.001353039 |
| ENSG00000269858 | EGLN2    | -0.637138193 | 0.001353039 |
| ENSG00000140905 | GCSH     | -1.704869283 | 0.001353462 |
| ENSG00000177600 | RPLP2    | -0.744696481 | 0.001367523 |
| ENSG00000260257 |          | -0.972711331 | 0.001385133 |
| ENSG00000025770 | NCAPH2   | -0.881499361 | 0.001385133 |
| ENSG00000071655 | MBD3     | -0.657395733 | 0.001386439 |
| ENSG00000255135 |          | -1.419252405 | 0.001386508 |
| ENSG00000167515 | TRAPPC2L | -0.592403767 | 0.001394041 |
| ENSG00000278784 |          | -0.904804063 | 0.001399262 |
| ENSG00000186501 | TMEM222  | -0.588097508 | 0.001417079 |
| ENSG00000205078 | SYCE1L   | -1.430591716 | 0.001426743 |
| ENSG00000002330 | BAD      | -0.647117355 | 0.001435023 |
| ENSG00000197457 | STMN3    | -1.145236243 | 0.00144081  |
| ENSG00000211899 | IGHM     | -2.574942964 | 0.001449424 |
| ENSG00000141577 | CEP131   | -0.74588634  | 0.001449424 |
| ENSG00000100380 | ST13     | -0.484762754 | 0.001451092 |
| ENSG00000188786 | MTF1     | 0.811727258  | 0.001452303 |
| ENSG00000198918 | RPL39    | -0.644881892 | 0.001472786 |
| ENSG00000228205 |          | -1.216856117 | 0.001492991 |
| ENSG00000133134 | BEX2     | -2.145700919 | 0.001503998 |
| ENSG00000170074 | FAM153A  | -2.953352319 | 0.001508862 |
| ENSG00000164919 | COX6C    | -0.595258792 | 0.001508862 |
| ENSG00000166441 | RPL27A   | -0.614488637 | 0.001508862 |
| ENSG00000100220 | RTCB     | 0.905331566  | 0.00151378  |
| ENSG00000100450 | GZMH     | -3.724857618 | 0.001518872 |
| ENSG00000091129 | NRCAM    | -4.253359495 | 0.001526301 |
| ENSG00000149541 | B3GAT3   | -0.625789499 | 0.001532483 |
| ENSG00000189171 | S100A13  | -1.114933609 | 0.001536871 |
| ENSG00000189046 | ALKBH2   | -0.919972205 | 0.001541163 |
| ENSG00000091640 | SPAG7    | -0.4975212   | 0.001541352 |
| ENSG00000100575 | TIMM9    | -0.659123505 | 0.001545275 |
| ENSG00000130313 | PGLS     | -0.612708684 | 0.001561499 |
| ENSG00000110200 | ANAPC15  | -0.562857539 | 0.001565445 |
| ENSG00000182899 | RPL35A   | -0.605205841 | 0.001591652 |

|                 |          |              |             |
|-----------------|----------|--------------|-------------|
| ENSG00000215021 | PHB2     | -0.430860393 | 0.001618179 |
| ENSG00000187630 | DHRS4L2  | -0.946029428 | 0.001626834 |
| ENSG00000155657 | TTN      | -1.78681676  | 0.00162855  |
| ENSG00000131591 | C1orf159 | -0.688736972 | 0.001632085 |
| ENSG00000169020 | ATP5I    | -0.623640967 | 0.001633719 |
| ENSG00000105197 | TIMM50   | -0.491195493 | 0.001635692 |
| ENSG00000213339 | QTRT1    | -0.749302748 | 0.001654195 |
| ENSG00000211898 | IGHD     | -2.55267733  | 0.001672761 |
| ENSG00000174292 | TNK1     | -3.290263786 | 0.001681447 |
| ENSG00000229659 | RPL26P6  | -0.965676181 | 0.001699132 |
| ENSG00000186230 | ZNF749   | -1.364432637 | 0.001699132 |
| ENSG00000163564 | PYHIN1   | -1.984386029 | 0.001699953 |
| ENSG00000237976 |          | -1.509758139 | 0.00171109  |
| ENSG00000138496 | PARP9    | 1.801034041  | 0.00171727  |
| ENSG00000211750 | TRBV24-1 | -4.048281756 | 0.00171727  |
| ENSG00000198695 | MT-ND6   | -0.986855952 | 0.00171727  |
| ENSG00000085563 | ABCB1    | -3.433711933 | 0.001729403 |
| ENSG00000170581 | STAT2    | 1.156446139  | 0.001736038 |
| ENSG00000117475 | BLZF1    | 0.791724459  | 0.001740117 |
| ENSG00000123989 | CHPF     | -3.450819145 | 0.001745049 |
| ENSG00000132661 | NXT1     | -1.000164202 | 0.001749114 |
| ENSG00000242485 | MRPL20   | -0.484480762 | 0.001759918 |
| ENSG00000214706 | IFRD2    | -0.695175693 | 0.001759918 |
| ENSG00000017483 | SLC38A5  | 1.894708707  | 0.001759918 |
| ENSG00000137054 | POLR1E   | -0.762689218 | 0.001759918 |
| ENSG00000180089 | TMEM86B  | -0.912626736 | 0.001759918 |
| ENSG00000184207 | PGP      | -0.719111418 | 0.001782345 |
| ENSG00000170634 | ACYP2    | -0.749196686 | 0.001789678 |
| ENSG00000119514 | GALNT12  | -2.139334428 | 0.001789678 |
| ENSG00000163644 | PPM1K    | 1.329797369  | 0.001799887 |
| ENSG00000233927 | RPS28    | -0.673091597 | 0.001822475 |
| ENSG00000204946 | ZNF783   | -0.64326063  | 0.001836448 |
| ENSG00000171863 | RPS7     | -0.500801482 | 0.001853573 |
| ENSG00000165688 | PMPCA    | -0.518455131 | 0.001853573 |
| ENSG00000186184 | POLR1D   | -0.488676474 | 0.00185704  |
| ENSG00000244723 | ASLP1    | -1.637695406 | 0.0018602   |
| ENSG00000162066 | AMDHD2   | -0.742738166 | 0.001864273 |
| ENSG00000058804 | NDC1     | -0.751211513 | 0.001888927 |
| ENSG00000149809 | TM7SF2   | -0.878526484 | 0.001888927 |
| ENSG00000250479 | CHCHD10  | -0.841421525 | 0.001888927 |
| ENSG00000172543 | CTSW     | -1.924427039 | 0.00190583  |
| ENSG00000128951 | DUT      | -0.892362449 | 0.001927018 |
| ENSG00000100075 | SLC25A1  | -0.706864944 | 0.001937437 |
| ENSG00000242574 | HLA-DMB  | -1.19739345  | 0.001963359 |
| ENSG00000169100 | SLC25A6  | -0.505082516 | 0.001972833 |
| ENSG00000204228 | HSD17B8  | -1.232960818 | 0.001985164 |
| ENSG00000243147 | MRPL33   | -0.58097028  | 0.001987346 |
| ENSG00000135617 | PRADC1   | -0.947177642 | 0.001987346 |

|                 |          |              |             |
|-----------------|----------|--------------|-------------|
| ENSG00000136938 | ANP32B   | -0.585334749 | 0.001987346 |
| ENSG00000183508 | FAM46C   | -2.505402765 | 0.002012319 |
| ENSG00000132465 | JCHAIN   | -3.097013532 | 0.002012319 |
| ENSG00000163794 | UCN      | -1.346560013 | 0.002061377 |
| ENSG00000135899 | SP110    | 1.209762012  | 0.002061377 |
| ENSG00000262089 |          | -0.93514743  | 0.002068321 |
| ENSG00000240230 | COX19    | -0.510066253 | 0.002092485 |
| ENSG00000198604 | BAZ1A    | 0.566140772  | 0.002092485 |
| ENSG00000105726 | ATP13A1  | 0.743610974  | 0.002092618 |
| ENSG00000171960 | PPIH     | -0.601896186 | 0.002109336 |
| ENSG00000243199 |          | -1.051029871 | 0.002109336 |
| ENSG00000151623 | NR3C2    | -1.587172362 | 0.002116577 |
| ENSG00000211689 | TRGC1    | -2.732172873 | 0.002134044 |
| ENSG00000247317 |          | 2.126325574  | 0.002134044 |
| ENSG00000272030 |          | -1.234836076 | 0.002137164 |
| ENSG00000105974 | CAV1     | -4.932177264 | 0.002165857 |
| ENSG00000188747 | NOXA1    | -1.068235379 | 0.002165857 |
| ENSG00000148950 | IMMP1L   | -1.172082041 | 0.002189815 |
| ENSG00000103528 | SYT17    | -1.790244717 | 0.002222068 |
| ENSG00000104936 | DMPK     | -1.255140736 | 0.002234058 |
| ENSG00000232472 | EEF1B2P3 | -0.83829887  | 0.00224768  |
| ENSG00000134262 | AP4B1    | -0.568181244 | 0.002276349 |
| ENSG00000137288 | UQCC2    | -1.038190718 | 0.002276349 |
| ENSG00000145390 | USP53    | -1.876875698 | 0.002284196 |
| ENSG00000234009 | RPL5P34  | -0.879525116 | 0.002286318 |
| ENSG00000257303 |          | -1.543800209 | 0.00229383  |
| ENSG00000176476 | SGF29    | -0.599437713 | 0.002295797 |
| ENSG00000198258 | UBL5     | -0.47887206  | 0.002307212 |
| ENSG00000211648 | IGLV1-47 | -3.188128985 | 0.002307212 |
| ENSG00000006015 | C19orf60 | -0.840431313 | 0.00231205  |
| ENSG00000206828 |          | -1.377334777 | 0.002320347 |
| ENSG00000272195 |          | -0.978505399 | 0.002325887 |
| ENSG00000140988 | RPS2     | -0.607745473 | 0.002336322 |
| ENSG00000104852 | SNRNP70  | -0.615869688 | 0.002339089 |
| ENSG00000173486 | FKBP2    | -0.860658965 | 0.002356163 |
| ENSG00000130204 | TOMM40   | -0.570189763 | 0.002387003 |
| ENSG00000179331 | RAB39A   | 1.698831443  | 0.002418351 |
| ENSG00000130487 | KLHDC7B  | 1.733113513  | 0.002424667 |
| ENSG00000008018 | PSMB1    | -0.464907359 | 0.002496126 |
| ENSG00000030419 | IKZF2    | -1.919486819 | 0.002510426 |
| ENSG00000228434 |          | -1.063039478 | 0.002516966 |
| ENSG00000177409 | SAMD9L   | 2.423278265  | 0.002523246 |
| ENSG00000167633 | KIR3DL1  | -4.223411078 | 0.002529204 |
| ENSG00000146215 | CRIP3    | -1.406669613 | 0.002559541 |
| ENSG00000171425 | ZNF581   | -0.719104478 | 0.002561286 |
| ENSG00000162576 | MXRA8    | -3.572319884 | 0.002566536 |
| ENSG00000185418 | TARSL2   | -0.784803254 | 0.002566536 |
| ENSG00000145741 | BTF3     | -0.461851102 | 0.002581089 |

|                 |           |              |             |
|-----------------|-----------|--------------|-------------|
| ENSG00000122643 | NT5C3A    | 1.317325129  | 0.002585847 |
| ENSG00000125991 | ERGIC3    | -0.43800389  | 0.00260207  |
| ENSG00000071859 | FAM50A    | -0.476306782 | 0.002616467 |
| ENSG00000281404 | LINC01176 | -1.164551407 | 0.002618652 |
| ENSG00000075568 | TMEM131   | 0.535251034  | 0.002629514 |
| ENSG00000081052 | COL4A4    | -4.037508604 | 0.002629579 |
| ENSG00000242060 | RPS3AP49  | -1.273964318 | 0.002629579 |
| ENSG00000110011 | DNAJC4    | -0.516651123 | 0.002648646 |
| ENSG00000186020 | ZNF529    | -0.908780081 | 0.002662185 |
| ENSG00000226777 | FAM30A    | -2.661282073 | 0.002668113 |
| ENSG00000137965 | IFI44     | 2.196433674  | 0.002683332 |
| ENSG00000139428 | MMAB      | -0.733197563 | 0.002699017 |
| ENSG00000272888 | LINC01578 | -0.772752541 | 0.002739942 |
| ENSG00000144713 | RPL32     | -0.600024025 | 0.002749482 |
| ENSG00000154102 | C16orf74  | -1.258071379 | 0.002751801 |
| ENSG00000185722 | ANKFY1    | 0.737371206  | 0.002751801 |
| ENSG00000142676 | RPL11     | -0.566461908 | 0.002778411 |
| ENSG00000232629 | HLA-DQB2  | -1.916052661 | 0.002778411 |
| ENSG00000119943 | PYROXD2   | -0.930166582 | 0.002778411 |
| ENSG00000170430 | MGMT      | -0.954731592 | 0.002778411 |
| ENSG00000168395 | ING5      | -0.750204282 | 0.002818468 |
| ENSG00000251580 |           | -1.315980363 | 0.002818468 |
| ENSG00000072121 | ZFYVE26   | 0.593596358  | 0.002835307 |
| ENSG00000163430 | FSTL1     | -2.806135045 | 0.002849376 |
| ENSG00000071082 | RPL31     | -0.569869918 | 0.002885416 |
| ENSG00000163599 | CTLA4     | -3.272974814 | 0.002888091 |
| ENSG00000215845 | TSTD1     | -0.942904412 | 0.002929217 |
| ENSG00000244720 |           | -3.810560581 | 0.002931755 |
| ENSG00000107719 | PALD1     | -2.691280411 | 0.002936921 |
| ENSG00000125652 | ALKBH7    | -0.790550229 | 0.002949662 |
| ENSG00000205544 | TMEM256   | -0.88921173  | 0.002965688 |
| ENSG00000101546 | RBFA      | -0.802965533 | 0.002975178 |
| ENSG00000092203 | TOX4      | 0.462109871  | 0.002987653 |
| ENSG00000108771 | DHX58     | 1.375746139  | 0.002995762 |
| ENSG00000185745 | IFIT1     | 3.378298653  | 0.002996848 |
| ENSG00000267281 |           | -1.02312114  | 0.002996848 |
| ENSG00000211785 | TRAV12-1  | -3.81000108  | 0.003005494 |
| ENSG00000163666 | HESX1     | 2.753459921  | 0.003040557 |
| ENSG00000131116 | ZNF428    | -0.597583836 | 0.00310363  |
| ENSG00000211794 | TRAV12-3  | -3.809812145 | 0.003111502 |
| ENSG00000176083 | ZNF683    | -4.031645831 | 0.003114556 |
| ENSG00000172936 | MYD88     | 0.759411381  | 0.003130104 |
| ENSG00000235043 | TECRP1    | -1.250033025 | 0.003145723 |
| ENSG00000130255 | RPL36     | -0.690341816 | 0.003152721 |
| ENSG00000149806 | FAU       | -0.530142028 | 0.003164132 |
| ENSG00000234327 |           | -1.578682041 | 0.003182264 |
| ENSG00000211795 | TRAV8-6   | -3.806193568 | 0.003187335 |
| ENSG00000125691 | RPL23     | -0.560708956 | 0.003228424 |

|                 |           |              |             |
|-----------------|-----------|--------------|-------------|
| ENSG00000167930 | FAM234A   | -0.612626129 | 0.003239193 |
| ENSG00000100823 | APEX1     | -0.557053616 | 0.003261212 |
| ENSG00000103260 | METRN     | -1.248967867 | 0.003305281 |
| ENSG00000211598 | IGKV4-1   | -3.558413387 | 0.003341618 |
| ENSG00000005022 | SLC25A5   | -0.636064927 | 0.003350222 |
| ENSG00000272556 | GTF2IP13  | -1.18145431  | 0.003351949 |
| ENSG00000167543 | TP53I13   | -0.775157309 | 0.003388679 |
| ENSG00000260911 |           | -1.447742281 | 0.003399717 |
| ENSG00000258472 |           | -0.78515948  | 0.003399717 |
| ENSG00000100416 | TRMU      | -0.598521785 | 0.00344042  |
| ENSG00000124614 | RPS10     | -0.628770672 | 0.003442988 |
| ENSG00000281205 | LINC00950 | -1.386752916 | 0.003442988 |
| ENSG00000167393 | PPP2R3B   | -0.984206651 | 0.003516662 |
| ENSG00000135469 | COQ10A    | -0.898849317 | 0.003524877 |
| ENSG00000211788 | TRAV13-1  | -3.475946962 | 0.003561299 |
| ENSG00000221957 | KIR2DS4   | -4.037811821 | 0.003607637 |
| ENSG00000138326 | RPS24     | -0.569181556 | 0.003618007 |
| ENSG00000273338 |           | -1.383005876 | 0.003621488 |
| ENSG00000235194 | PPP1R3E   | -0.914048074 | 0.003666741 |
| ENSG00000173660 | UQCRH     | -0.468939113 | 0.003687002 |
| ENSG00000168229 | PTGDR     | -3.293510903 | 0.003687002 |
| ENSG00000120885 | CLU       | 2.915827551  | 0.003687796 |
| ENSG00000105258 | POLR2I    | -0.775322734 | 0.003742581 |
| ENSG00000211803 | TRAV23DV6 | -3.464460059 | 0.003756506 |
| ENSG00000115760 | BIRC6     | 0.631050579  | 0.003762099 |
| ENSG00000172590 | MRPL52    | -0.718302792 | 0.003762099 |
| ENSG00000042753 | AP2S1     | -0.729217046 | 0.003762099 |
| ENSG00000108984 | MAP2K6    | 1.423757981  | 0.003814168 |
| ENSG00000099977 | DDT       | -0.739303715 | 0.003837421 |
| ENSG00000130813 | C19orf66  | 0.869096867  | 0.00385685  |
| ENSG00000105519 | CAPS      | -0.845084843 | 0.003862811 |
| ENSG00000180543 | TSPYL5    | -1.166334836 | 0.003887091 |
| ENSG00000224631 | RPS27AP16 | -0.675220599 | 0.003887091 |
| ENSG00000115274 | INO80B    | -0.895649136 | 0.003897304 |
| ENSG00000105088 | OLFM2     | -3.790403614 | 0.003897304 |
| ENSG00000100227 | POLDIP3   | 0.450905706  | 0.003897304 |
| ENSG00000148291 | SURF2     | -0.655670304 | 0.003906084 |
| ENSG00000237772 |           | -1.439841811 | 0.003966043 |
| ENSG00000164649 | CDCA7L    | -1.040443289 | 0.003975205 |
| ENSG00000257093 | KIAA1147  | -0.727090515 | 0.003975205 |
| ENSG00000228444 |           | -2.247101102 | 0.004099374 |
| ENSG00000211956 | IGHV4-34  | -3.138745881 | 0.004123423 |
| ENSG00000260910 | LINC00565 | -2.529063483 | 0.004166361 |
| ENSG00000152795 | HNRNPDL   | -0.421574064 | 0.004191667 |
| ENSG00000150401 | DCUN1D2   | -0.551935879 | 0.00424472  |
| ENSG00000136643 | RPS6KC1   | 0.551647774  | 0.004367828 |
| ENSG00000254709 | IGLL5     | -3.286423802 | 0.004398542 |
| ENSG00000117010 | ZNF684    | 1.02726853   | 0.004400343 |



|                 |           |              |             |
|-----------------|-----------|--------------|-------------|
| ENSG00000177455 | CD19      | -1.77450544  | 0.004400343 |
| ENSG00000242125 | SNHG3     | -0.718633146 | 0.00441103  |
| ENSG00000119917 | IFIT3     | 3.31607972   | 0.00444772  |
| ENSG00000173581 | CCDC106   | -1.069160411 | 0.004512892 |
| ENSG00000232346 |           | -1.400608068 | 0.004629858 |
| ENSG00000054523 | KIF1B     | 0.867949541  | 0.004663531 |
| ENSG00000166435 | XRRA1     | 2.277636235  | 0.004756594 |
| ENSG00000274605 |           | -1.617476553 | 0.004783684 |
| ENSG00000101391 | CDK5RAP1  | -0.441121525 | 0.004823892 |
| ENSG00000095906 | NUBP2     | -0.648566954 | 0.004902994 |
| ENSG00000279605 |           | -1.817388061 | 0.004916951 |
| ENSG00000275413 |           | -1.692304565 | 0.004916951 |
| ENSG00000091409 | ITGA6     | -1.554797367 | 0.004926076 |
| ENSG00000269893 | SNHG8     | -0.915979704 | 0.004930682 |
| ENSG00000115415 | STAT1     | 1.631028864  | 0.005030293 |
| ENSG00000260676 | LINC01541 | 1.909867909  | 0.005030293 |
| ENSG00000158552 | ZFAND2B   | -0.459763435 | 0.005035996 |
| ENSG00000007402 | CACNA2D2  | -2.329048542 | 0.005035996 |
| ENSG00000145287 | PLAC8     | 1.207345184  | 0.005076234 |
| ENSG00000269951 |           | -1.510942157 | 0.005100218 |
| ENSG00000215375 | MYL5      | -1.026525087 | 0.005103966 |
| ENSG00000150456 | EEF1AKMT1 | -1.268231703 | 0.005109127 |
| ENSG00000171703 | TCEA2     | -0.622922133 | 0.00512065  |
| ENSG00000149743 | TRPT1     | -0.74074439  | 0.005141504 |
| ENSG00000119682 | AREL1     | 0.520490859  | 0.005182733 |
| ENSG00000125520 | SLC2A4RG  | -0.613552049 | 0.005196793 |
| ENSG00000168393 | DTYMK     | -0.983196818 | 0.00522779  |
| ENSG00000254911 | SCARNA9   | -1.088930455 | 0.00522779  |
| ENSG00000197776 | KLHDC1    | -1.022240961 | 0.00522779  |
| ENSG00000090238 | YPEL3     | -0.710406775 | 0.00522779  |
| ENSG00000083457 | ITGAE     | -0.854994519 | 0.00522779  |
| ENSG00000118418 | HMG3      | -0.693139145 | 0.005287534 |
| ENSG00000261662 |           | -0.722111336 | 0.005305765 |
| ENSG00000137310 | TCF19     | -1.450430084 | 0.005345435 |
| ENSG00000228106 |           | -1.161429656 | 0.005364505 |
| ENSG00000238142 |           | -1.12786702  | 0.005376731 |
| ENSG00000147687 | TATDN1    | -0.651493085 | 0.005376731 |
| ENSG00000163508 | EOMES     | -3.617920749 | 0.005394996 |
| ENSG00000251023 |           | -1.235655791 | 0.005404381 |
| ENSG00000213397 | HAUS7     | -0.841543258 | 0.005488566 |
| ENSG00000257621 | PSMA3-AS1 | -0.590866684 | 0.005488566 |
| ENSG00000088356 | PDRG1     | -0.743535963 | 0.005488566 |
| ENSG00000198646 | NCOA6     | 0.530406081  | 0.005488566 |
| ENSG00000141096 | DPEP3     | -1.338357677 | 0.005516815 |
| ENSG00000211592 | IGKC      | -2.561833705 | 0.005550161 |
| ENSG00000186265 | BTLA      | -2.090466358 | 0.005550161 |
| ENSG00000161021 | MAML1     | 0.557207852  | 0.005550161 |
| ENSG00000197958 | RPL12     | -0.567477825 | 0.005550161 |

|                 |           |              |             |
|-----------------|-----------|--------------|-------------|
| ENSG00000179632 | MAF1      | -0.45651211  | 0.005570885 |
| ENSG00000136874 | STX17     | 0.711504393  | 0.005613442 |
| ENSG00000221963 | APOL6     | 1.146832025  | 0.005650226 |
| ENSG00000143515 | ATP8B2    | -1.126132109 | 0.005696364 |
| ENSG00000176978 | DPP7      | -0.511238488 | 0.005696364 |
| ENSG00000214026 | MRPL23    | -0.747557922 | 0.005701526 |
| ENSG00000110497 | AMBRA1    | 0.515659085  | 0.005701526 |
| ENSG00000169992 | NLGN2     | -1.255464012 | 0.005710946 |
| ENSG00000141858 | SAMD1     | -0.867063732 | 0.005719449 |
| ENSG00000163840 | DTX3L     | 1.463076465  | 0.005749765 |
| ENSG00000182685 | BRICD5    | -1.163377704 | 0.005749765 |
| ENSG00000188599 | NPIPP1    | -1.016073719 | 0.005771272 |
| ENSG00000108961 | RANGRF    | -0.556180848 | 0.005771272 |
| ENSG00000175756 | AURKAIP1  | -0.548553001 | 0.005780322 |
| ENSG00000196116 | TDRD7     | 0.978683141  | 0.005817583 |
| ENSG00000112419 | PHACTR2   | 0.984741176  | 0.005846391 |
| ENSG00000119650 | IFT43     | -0.723296864 | 0.005953883 |
| ENSG00000159958 | TNFRSF13C | -1.733520596 | 0.005990995 |
| ENSG00000263465 | SRSF8     | -0.619473845 | 0.006022803 |
| ENSG00000143222 | UFC1      | -0.408895501 | 0.006047557 |
| ENSG00000229809 | ZNF688    | -0.6131909   | 0.006102597 |
| ENSG00000105640 | RPL18A    | -0.680237544 | 0.006102597 |
| ENSG00000091972 | CD200     | -2.772195836 | 0.006115276 |
| ENSG00000105968 | H2AFV     | -0.549793474 | 0.006115276 |
| ENSG00000106133 | NSUN5P2   | -1.23934778  | 0.006115276 |
| ENSG00000282034 |           | -0.927210969 | 0.006115276 |
| ENSG00000198242 | RPL23A    | -0.535653341 | 0.006115276 |
| ENSG00000160050 | CCDC28B   | -1.127235447 | 0.006248614 |
| ENSG00000131143 | COX4I1    | -0.615828106 | 0.006248614 |
| ENSG00000125458 | NT5C      | -0.732257873 | 0.00625249  |
| ENSG00000143297 | FCRL5     | -1.66640251  | 0.006257931 |
| ENSG00000167671 | UBXN6     | -0.503331314 | 0.006275423 |
| ENSG00000187912 | CLEC17A   | -1.71336925  | 0.006316004 |
| ENSG00000133818 | RRAS2     | -2.12788443  | 0.00638121  |
| ENSG00000211890 | IGHA2     | -3.768716107 | 0.00638121  |
| ENSG00000170448 | NFXL1     | -0.96615348  | 0.006390453 |
| ENSG00000279491 |           | -1.341594364 | 0.006390453 |
| ENSG00000154358 | OBSCN     | -1.116533745 | 0.006390892 |
| ENSG00000175193 | PARL      | -0.42071223  | 0.006412079 |
| ENSG00000164168 | TMEM184C  | 0.675968208  | 0.006412079 |
| ENSG00000242071 | RPL7AP6   | -0.507626688 | 0.006412079 |
| ENSG00000170476 | MZB1      | -2.600215232 | 0.006412354 |
| ENSG00000112651 | MRPL2     | -0.590654242 | 0.006412354 |
| ENSG00000260711 |           | -2.386545413 | 0.006412354 |
| ENSG00000106268 | NUDT1     | -0.794925259 | 0.006430892 |
| ENSG00000143365 | RORC      | -3.295107354 | 0.006448205 |
| ENSG00000125877 | ITPA      | -0.629610102 | 0.006501465 |
| ENSG00000189007 | ADAT2     | -0.67748119  | 0.006502166 |

|                 |              |              |             |
|-----------------|--------------|--------------|-------------|
| ENSG00000239246 |              | -0.967740524 | 0.006502166 |
| ENSG00000277476 |              | -0.84517529  | 0.006502166 |
| ENSG00000262814 | MRPL12       | -1.126811985 | 0.006520707 |
| ENSG00000109084 | TMEM97       | -1.565088168 | 0.006552117 |
| ENSG00000105618 | PRPF31       | -0.320470529 | 0.006566947 |
| ENSG00000164587 | RPS14        | -0.591232133 | 0.00656868  |
| ENSG00000116983 | HPCAL4       | -2.564606275 | 0.006608617 |
| ENSG00000234608 | MAPKAPK5-AS1 | -0.736441449 | 0.006608617 |
| ENSG00000196814 | MVB12B       | 1.194285859  | 0.006715757 |
| ENSG00000167775 | CD320        | -1.157253018 | 0.006787393 |
| ENSG00000160683 | CXCR5        | -2.663328355 | 0.006794946 |
| ENSG00000173991 | TCAP         | -1.137628099 | 0.00684445  |
| ENSG00000132530 | XAF1         | 2.062417745  | 0.006941968 |
| ENSG00000187801 | ZFP69B       | 1.615322312  | 0.006976912 |
| ENSG00000180739 | S1PR5        | -3.19314575  | 0.006996496 |
| ENSG00000162739 | SLAMF6       | -1.609125103 | 0.007035685 |
| ENSG00000106211 | HSPB1        | -0.86800819  | 0.007052093 |
| ENSG00000177294 | FBXO39       | 3.196448003  | 0.007101112 |
| ENSG00000154451 | GBP5         | 1.617552062  | 0.007108739 |
| ENSG00000226396 |              | -1.17527956  | 0.007132617 |
| ENSG00000168297 | PXK          | 0.61349204   | 0.007173042 |
| ENSG00000204514 | ZNF814       | -0.862573314 | 0.00724662  |
| ENSG00000159674 | SPON2        | -1.574587655 | 0.007250759 |
| ENSG00000245954 |              | -3.478701616 | 0.007250759 |
| ENSG00000021355 | SERPINB1     | 0.539946934  | 0.007250759 |
| ENSG00000122140 | MRPS2        | -0.618453026 | 0.007250759 |
| ENSG00000116898 | MRPS15       | -0.502582497 | 0.007261059 |
| ENSG00000205336 | ADGRG1       | -2.665424849 | 0.007270512 |
| ENSG00000165716 | FAM69B       | -3.63476677  | 0.007274028 |
| ENSG00000137414 | FAM8A1       | 0.78297763   | 0.007353886 |
| ENSG00000178498 | DTX3         | -1.273556045 | 0.007353886 |
| ENSG00000118523 | CTGF         | -4.009995666 | 0.007430689 |
| ENSG00000011590 | ZBTB32       | -3.796516973 | 0.007439447 |
| ENSG00000108298 | RPL19        | -0.459548471 | 0.007453444 |
| ENSG00000119778 | ATAD2B       | 0.632073686  | 0.007461982 |
| ENSG00000230155 |              | -0.878134987 | 0.007461982 |
| ENSG00000188542 | DUSP28       | -0.532924972 | 0.007489458 |
| ENSG00000115286 | NDUFS7       | -0.510651899 | 0.00750534  |
| ENSG00000172809 | RPL38        | -0.586652241 | 0.007509344 |
| ENSG00000159445 | THEM4        | -1.083386903 | 0.007513328 |
| ENSG00000205581 | HMG1         | -0.588019394 | 0.007529621 |
| ENSG00000134371 | CDC73        | 0.545193613  | 0.007577534 |
| ENSG00000169738 | DCXR         | -0.796433956 | 0.007632459 |
| ENSG00000114388 | NPRL2        | -0.606056714 | 0.007653417 |
| ENSG00000182749 | PAQR7        | -0.988648959 | 0.00770553  |
| ENSG00000139211 | AMIGO2       | 1.112058967  | 0.007728162 |
| ENSG00000170291 | ELP5         | -0.451100699 | 0.007728162 |
| ENSG00000148308 | GTF3C5       | -0.38828101  | 0.007832655 |

|                 |           |              |             |
|-----------------|-----------|--------------|-------------|
| ENSG00000211746 | TRBV19    | -3.261524859 | 0.007834932 |
| ENSG00000235776 |           | -0.570357062 | 0.007857373 |
| ENSG00000146066 | HIGD2A    | -0.508846717 | 0.007858926 |
| ENSG00000138615 | CILP      | -2.164202421 | 0.007881525 |
| ENSG00000101337 | TM9SF4    | 0.507323909  | 0.007915246 |
| ENSG00000167658 | EEF2      | -0.433244129 | 0.007923108 |
| ENSG00000071462 | WBSCR22   | -0.564191381 | 0.0079999   |
| ENSG00000240972 | MIF       | -0.687637951 | 0.008014965 |
| ENSG00000115159 | GPD2      | 0.770871213  | 0.008019556 |
| ENSG00000163867 | ZMYM6     | -0.49786665  | 0.00805075  |
| ENSG00000163156 | SCNM1     | -0.469275116 | 0.00805075  |
| ENSG00000218175 |           | -1.081957236 | 0.00805075  |
| ENSG00000272758 |           | -0.94366131  | 0.00805075  |
| ENSG00000258704 | SRP54-AS1 | -1.150107289 | 0.00805075  |
| ENSG00000165516 | KLHDC2    | -0.546779085 | 0.00805075  |
| ENSG00000170860 | LSM3      | -0.552215245 | 0.008084872 |
| ENSG00000136444 | RSAD1     | -0.732249455 | 0.00814951  |
| ENSG00000144161 | ZC3H8     | -0.700336371 | 0.008183046 |
| ENSG00000137876 | RSL24D1   | -0.612271686 | 0.008266927 |
| ENSG00000174721 | FGFBP3    | -1.051599989 | 0.008283057 |
| ENSG00000254815 |           | -2.522746154 | 0.008294645 |
| ENSG00000063046 | EIF4B     | -0.58158112  | 0.008364561 |
| ENSG00000144645 | OSBPL10   | -1.651067855 | 0.008398028 |
| ENSG00000174547 | MRPL11    | -0.538131263 | 0.008398028 |
| ENSG00000184436 | THAP7     | -0.612059548 | 0.008398028 |
| ENSG00000235954 | TTC28-AS1 | -0.695683084 | 0.008443031 |
| ENSG00000105372 | RPS19     | -0.567716037 | 0.008500143 |
| ENSG00000143543 | JTB       | -0.42606116  | 0.008503651 |
| ENSG00000273466 |           | -0.940854962 | 0.008503651 |
| ENSG00000161179 | YDJC      | -0.590714262 | 0.008595385 |
| ENSG00000211734 | TRBV5-1   | -2.961716816 | 0.008627493 |
| ENSG00000107872 | FBXL15    | -0.780552922 | 0.008627493 |
| ENSG00000135114 | OASL      | 2.577039865  | 0.008683968 |
| ENSG00000170835 | CEL       | -1.690082517 | 0.008712379 |
| ENSG00000089639 | GMIP      | 0.424562652  | 0.008712379 |
| ENSG00000158457 | TSPAN33   | -1.350702828 | 0.008751976 |
| ENSG00000161395 | PGAP3     | -0.524266369 | 0.008751976 |
| ENSG00000130684 | ZNF337    | -0.631394636 | 0.008751976 |
| ENSG00000122218 | COPA      | 0.670270176  | 0.008762951 |
| ENSG00000205837 | LINC00487 | 3.37091216   | 0.008762951 |
| ENSG00000111879 | FAM184A   | -3.25943725  | 0.008762951 |
| ENSG00000108515 | ENO3      | -0.830504914 | 0.008762951 |
| ENSG00000196262 | PPIA      | -0.442714248 | 0.008768219 |
| ENSG00000235065 | RPL24P2   | -0.966378673 | 0.00878134  |
| ENSG00000272688 |           | -1.227797565 | 0.008800031 |
| ENSG00000133056 | PIK3C2B   | -0.981242108 | 0.008835169 |
| ENSG00000199753 | SNORD104  | -1.304484153 | 0.008842684 |
| ENSG00000161912 | ADCY10P1  | -0.791950249 | 0.008877956 |

|                 |           |              |             |
|-----------------|-----------|--------------|-------------|
| ENSG00000182541 | LIMK2     | 0.882307148  | 0.008877956 |
| ENSG00000185839 |           | 1.374076737  | 0.008912945 |
| ENSG00000272645 | GTF2IP20  | -0.761703148 | 0.008913296 |
| ENSG00000220201 | ZGLP1     | -1.087373653 | 0.008952935 |
| ENSG00000109046 | WSB1      | 0.77860666   | 0.008980635 |
| ENSG00000142552 | RCN3      | -1.137756026 | 0.008980635 |
| ENSG00000254402 | LRRC24    | -1.138701897 | 0.00899864  |
| ENSG00000167965 | MLST8     | -0.572348225 | 0.00899864  |
| ENSG00000142534 | RPS11     | -0.481796891 | 0.00899864  |
| ENSG00000178015 | GPR150    | -3.272440266 | 0.009045584 |
| ENSG00000073536 | NLE1      | -0.906236214 | 0.009045584 |
| ENSG00000188846 | RPL14     | -0.503545819 | 0.009050934 |
| ENSG00000140612 | SEC11A    | -0.509756232 | 0.009075581 |
| ENSG00000142684 | ZNF593    | -0.813535566 | 0.009136119 |
| ENSG00000152082 | MZT2B     | -0.630803266 | 0.009147456 |
| ENSG00000262919 | FAM58A    | -0.610755004 | 0.009147456 |
| ENSG00000160932 | LY6E      | 1.413642928  | 0.009350999 |
| ENSG00000056972 | TRAF3IP2  | 0.998618502  | 0.009460534 |
| ENSG00000264812 |           | -1.508854906 | 0.009474529 |
| ENSG00000163584 | RPL22L1   | -0.677480246 | 0.009493084 |
| ENSG00000196141 | SPATS2L   | 2.044626281  | 0.009502716 |
| ENSG00000004838 | ZMYND10   | -1.401441026 | 0.009527713 |
| ENSG00000266677 |           | -1.098088957 | 0.009584396 |
| ENSG00000275056 |           | -1.232632003 | 0.009590821 |
| ENSG00000135390 | ATP5G2    | -0.451582539 | 0.00966023  |
| ENSG00000233830 | EIF4HP1   | 0.974566396  | 0.009667971 |
| ENSG00000176490 | DIRAS1    | -3.326449375 | 0.009685261 |
| ENSG00000146859 | TMEM140   | 1.215696037  | 0.009686831 |
| ENSG00000123545 | NDUF4F4   | -0.759418845 | 0.009694831 |
| ENSG00000177595 | PIDD1     | -0.614003906 | 0.009983975 |
| ENSG00000240342 | RPS2P5    | -0.667195142 | 0.009993581 |
| ENSG00000214113 | LYRM4     | -0.589422964 | 0.009999842 |
| ENSG00000149823 | VPS51     | -0.470844894 | 0.010006046 |
| ENSG00000211787 | TRAV8-3   | -3.516730014 | 0.010017909 |
| ENSG00000156482 | RPL30     | -0.504390862 | 0.010065681 |
| ENSG00000211796 | TRAV16    | -3.513118229 | 0.010065732 |
| ENSG00000230074 |           | -0.989848975 | 0.010070915 |
| ENSG00000155792 | DEPTOR    | -1.977539954 | 0.010071985 |
| ENSG00000227191 | TRGC2     | -1.939551456 | 0.010072877 |
| ENSG00000204272 | LINC01420 | -0.623368116 | 0.010084068 |
| ENSG00000147576 | ADHFE1    | -0.987441136 | 0.010084068 |
| ENSG00000230099 | TRBV5-4   | -3.512069871 | 0.010137044 |
| ENSG00000106785 | TRIM14    | 1.227136586  | 0.010137044 |
| ENSG00000228775 | WEE2-AS1  | -2.286094723 | 0.01015285  |
| ENSG00000161640 | SIGLEC11  | 2.079317375  | 0.01015285  |
| ENSG00000229638 | RPL4P4    | -0.573320279 | 0.010165869 |
| ENSG00000188313 | PLSCR1    | 1.414142798  | 0.01029454  |
| ENSG00000211793 | TRAV9-2   | -3.519189578 | 0.01029454  |

|                 |           |              |             |
|-----------------|-----------|--------------|-------------|
| ENSG00000109184 | DCUN1D4   | -0.617892413 | 0.010307042 |
| ENSG00000235508 | RPS2P7    | -1.03657292  | 0.010393145 |
| ENSG00000211792 | TRAV14DV4 | -3.522500562 | 0.010395799 |
| ENSG00000271347 |           | -2.509799967 | 0.010395799 |
| ENSG00000127554 | GFER      | -0.520493058 | 0.010395799 |
| ENSG00000115268 | RPS15     | -0.581637692 | 0.010395799 |
| ENSG00000276557 | TRBV18    | -3.512673109 | 0.010537167 |
| ENSG00000117519 | CNN3      | -3.145971047 | 0.010615606 |
| ENSG00000250317 | SMIM20    | -0.680619236 | 0.010660228 |
| ENSG00000211776 | TRAV2     | -3.514952937 | 0.010738187 |
| ENSG00000111863 | ADTRP     | -2.187277092 | 0.010784797 |
| ENSG00000204899 | MZT1      | -0.653170484 | 0.010790587 |
| ENSG00000225756 | DBH-AS1   | -3.525047568 | 0.010809409 |
| ENSG00000244701 |           | -1.141700309 | 0.010855666 |
| ENSG00000080854 | IGSF9B    | -3.528749915 | 0.010855666 |
| ENSG00000211797 | TRAV17    | -3.264627863 | 0.010855666 |
| ENSG00000140931 | CMTM3     | -0.492798671 | 0.010855666 |
| ENSG00000267321 |           | -0.803758289 | 0.010855666 |
| ENSG00000105364 | MRPL4     | -0.518903762 | 0.010855666 |
| ENSG00000198938 | MT-CO3    | -0.626052709 | 0.010855666 |
| ENSG00000113532 | ST8SIA4   | 0.784943979  | 0.010858983 |
| ENSG00000147677 | EIF3H     | -0.338769488 | 0.010861233 |
| ENSG00000104960 | PTOV1     | -0.576627852 | 0.010894709 |
| ENSG00000211801 | TRAV21    | -3.511473158 | 0.010922375 |
| ENSG00000068079 | IFI35     | 1.15231457   | 0.010939216 |
| ENSG00000135486 | HNRNPA1   | -0.417812673 | 0.010948901 |
| ENSG00000273253 |           | -1.081207127 | 0.010998336 |
| ENSG00000231500 | RPS18     | -0.54357054  | 0.011034398 |
| ENSG00000175866 | BAIAP2    | -0.813323971 | 0.011171871 |
| ENSG00000136758 | YME1L1    | 0.566346097  | 0.011177577 |
| ENSG00000173726 | TOMM20    | -0.472514253 | 0.011191411 |
| ENSG00000215030 | RPL13P12  | -1.140904216 | 0.011216558 |
| ENSG00000211724 | TRBV6-6   | -3.502610175 | 0.011251369 |
| ENSG00000132109 | TRIM21    | 1.218594881  | 0.01129568  |
| ENSG00000134644 | PUM1      | 0.416965865  | 0.011327546 |
| ENSG00000163050 | COQ8A     | -0.499149956 | 0.011327546 |
| ENSG00000242324 |           | 2.037023439  | 0.011327546 |
| ENSG00000269343 | ZNF587B   | -0.811509516 | 0.011327546 |
| ENSG00000234785 | EEF1GP5   | -1.594136713 | 0.011399882 |
| ENSG00000100307 | CBX7      | -0.812090482 | 0.011399882 |
| ENSG00000113494 | PRLR      | 1.385197353  | 0.011453567 |
| ENSG00000258297 |           | -0.806255263 | 0.011549089 |
| ENSG00000248578 | NPM1P21   | -1.520715588 | 0.011676495 |
| ENSG00000086065 | CHMP5     | 0.869300596  | 0.011710083 |
| ENSG00000236552 | RPL13AP5  | -0.548815384 | 0.011710083 |
| ENSG00000212802 | RPL15P3   | -0.609619552 | 0.0117448   |
| ENSG00000235576 |           | -3.250263954 | 0.011771528 |
| ENSG00000172534 | HCFC1     | 0.54318123   | 0.011779969 |

|                 |            |              |             |
|-----------------|------------|--------------|-------------|
| ENSG00000143437 | ARNT       | 0.526541535  | 0.011829351 |
| ENSG00000205702 | CYP2D7     | -0.966229542 | 0.011829351 |
| ENSG00000186918 | ZNF395     | -0.78480884  | 0.011842238 |
| ENSG00000189409 | MMP23B     | -2.018668172 | 0.011881165 |
| ENSG00000275491 |            | -2.857909953 | 0.011949426 |
| ENSG00000156795 | WDYHV1     | -0.734407989 | 0.012025556 |
| ENSG00000267858 | MZF1-AS1   | -1.014687982 | 0.012056385 |
| ENSG00000182512 | GLRX5      | -0.597080126 | 0.012067336 |
| ENSG00000245970 |            | -1.596422478 | 0.012070909 |
| ENSG00000273344 | PAXIP1-AS1 | -1.015181513 | 0.012207509 |
| ENSG00000273015 |            | -0.561246381 | 0.012207509 |
| ENSG00000178226 | PRSS36     | -0.930012719 | 0.012207509 |
| ENSG00000234912 | SNHG20     | -0.938012453 | 0.01221256  |
| ENSG00000079337 | RAPGEF3    | -2.175191126 | 0.012234211 |
| ENSG00000273486 |            | -1.151880901 | 0.012269658 |
| ENSG00000140990 | NDUFB10    | -0.611648871 | 0.012285141 |
| ENSG00000166750 | SLFN5      | 1.722154134  | 0.012285141 |
| ENSG00000136960 | ENPP2      | 2.168941175  | 0.012334015 |
| ENSG00000267469 |            | -2.881437085 | 0.012334015 |
| ENSG00000213928 | IRF9       | 0.62902664   | 0.012341389 |
| ENSG00000126709 | IFI6       | 1.794015013  | 0.012377059 |
| ENSG00000105700 | KXD1       | -0.311496337 | 0.012377059 |
| ENSG00000237276 | ANO7L1     | 1.687105099  | 0.012382767 |
| ENSG00000130725 | UBE2M      | -0.471654901 | 0.012382767 |
| ENSG00000213949 | ITGA1      | 2.013415713  | 0.01247131  |
| ENSG00000277998 |            | -0.797598276 | 0.012473961 |
| ENSG00000273314 |            | 1.270971866  | 0.012473961 |
| ENSG00000167094 | TTC16      | -1.517629408 | 0.012473961 |
| ENSG00000171222 | SCAND1     | -0.628919313 | 0.012473961 |
| ENSG00000260260 | SNHG19     | -1.405936689 | 0.012517745 |
| ENSG00000211965 | IGHV3-49   | -3.258177567 | 0.012580941 |
| ENSG00000178467 | P4HTM      | -0.513301586 | 0.012592552 |
| ENSG00000254470 | AP5B1      | 0.835257258  | 0.012592552 |
| ENSG00000229117 | RPL41      | -0.517651162 | 0.012611787 |
| ENSG00000256053 | APOPT1     | -0.616681079 | 0.012634351 |
| ENSG00000257704 | INAFM1     | -0.838635791 | 0.012684804 |
| ENSG00000105518 | TMEM205    | -0.607528472 | 0.012707897 |
| ENSG00000258944 |            | -0.848551425 | 0.012751867 |
| ENSG00000168056 | LTBP3      | -1.005572136 | 0.012775509 |
| ENSG00000120896 | SORBS3     | -0.842239839 | 0.012851865 |
| ENSG00000183542 | KLRC4      | -3.519342173 | 0.012898851 |
| ENSG00000087237 | CETP       | -1.662371153 | 0.012929308 |
| ENSG00000233762 |            | -0.748191464 | 0.012948624 |
| ENSG00000215769 |            | -0.520146682 | 0.012948624 |
| ENSG00000149927 | DOC2A      | -1.315887536 | 0.012984483 |
| ENSG00000169087 | HSPBAP1    | -0.597915642 | 0.01307667  |
| ENSG00000272449 |            | -0.971077091 | 0.013084774 |
| ENSG00000055118 | KCNH2      | -3.506917944 | 0.013084774 |

|                 |            |              |             |
|-----------------|------------|--------------|-------------|
| ENSG00000165795 | NDRG2      | -0.79173943  | 0.013084774 |
| ENSG00000210151 | MT-TS1     | -1.737677285 | 0.013085773 |
| ENSG00000065526 | SPEN       | 0.563420163  | 0.013224068 |
| ENSG00000147180 | ZNF711     | -2.16869665  | 0.013224068 |
| ENSG00000277394 | NA         | -1.089742096 | 0.013258969 |
| ENSG00000213190 | MLLT11     | -0.858086348 | 0.013296148 |
| ENSG00000204217 | BMPR2      | 0.733837102  | 0.013296148 |
| ENSG00000164054 | SHISA5     | 0.70956252   | 0.013296148 |
| ENSG00000273437 |            | -1.66056545  | 0.013296148 |
| ENSG00000007520 | TSR3       | -0.588449868 | 0.013296148 |
| ENSG00000081985 | IL12RB2    | -3.073461965 | 0.013317586 |
| ENSG00000198677 | TTC37      | 0.552528011  | 0.013317586 |
| ENSG00000237190 | CDKN2AIPNL | -0.520466358 | 0.01336401  |
| ENSG00000166912 | MTMR10     | 0.514013269  | 0.013380965 |
| ENSG00000162736 | NCSTN      | 0.480432559  | 0.013407314 |
| ENSG00000114779 | ABHD14B    | -0.494157949 | 0.013409732 |
| ENSG00000271553 |            | -1.510245242 | 0.013409732 |
| ENSG00000240682 | ISY1       | -0.360776119 | 0.013435811 |
| ENSG00000258199 |            | -0.622151467 | 0.013435811 |
| ENSG00000211669 | IGLV3-10   | -3.782053925 | 0.013435811 |
| ENSG00000259658 |            | -1.677475795 | 0.013483798 |
| ENSG00000163382 | NAXE       | -0.575187072 | 0.013484458 |
| ENSG00000184897 | H1FX       | -0.727008081 | 0.013506469 |
| ENSG00000084207 | GSTP1      | -0.731848515 | 0.013506469 |
| ENSG00000273149 |            | -2.045756456 | 0.013506469 |
| ENSG00000187840 | EIF4EBP1   | -0.780402165 | 0.013530932 |
| ENSG00000113615 | SEC24A     | 0.778597553  | 0.01354129  |
| ENSG00000127884 | ECHS1      | -0.653674984 | 0.013647942 |
| ENSG00000148019 | CEP78      | -0.899135607 | 0.013734942 |
| ENSG00000265206 | MIR142     | -1.187633688 | 0.013734942 |
| ENSG00000078487 | ZCWPW1     | -0.789108602 | 0.013792294 |
| ENSG00000163565 | IFI16      | 1.190751141  | 0.01382954  |
| ENSG00000122543 | OCM        | -2.267874837 | 0.01382954  |
| ENSG00000118181 | RPS25      | -0.477755511 | 0.013890027 |
| ENSG00000167969 | ECI1       | -0.645584092 | 0.013949731 |
| ENSG00000270605 |            | -1.346253765 | 0.013978934 |
| ENSG00000144034 | TPRKB      | -0.537903195 | 0.013997871 |
| ENSG00000170667 | RASA4B     | -1.240791366 | 0.013997871 |
| ENSG00000198964 | SGMS1      | 0.705460877  | 0.014002392 |
| ENSG00000103264 | FBXO31     | -0.560267772 | 0.014002392 |
| ENSG00000198455 | ZXDB       | -0.672364179 | 0.014052034 |
| ENSG00000241343 | RPL36A     | -0.670842947 | 0.014052034 |
| ENSG00000177990 | DPY19L2    | -3.250715843 | 0.014052034 |
| ENSG00000180228 | PRKRA      | -0.459795781 | 0.01407087  |
| ENSG00000141560 | FN3KRP     | -0.504027964 | 0.01407087  |
| ENSG00000214389 | RPS3AP26   | -0.595167186 | 0.014071635 |
| ENSG00000124713 | GNMT       | -0.859496577 | 0.014142833 |
| ENSG00000251867 |            | -1.065093226 | 0.014142833 |



|                 |              |              |             |
|-----------------|--------------|--------------|-------------|
| ENSG00000160307 | S100B        | -2.579918498 | 0.014260542 |
| ENSG00000211666 | IGLV2-14     | -3.150814001 | 0.014275095 |
| ENSG00000078043 | PIAS2        | -0.509689419 | 0.014284663 |
| ENSG00000165874 | FAM35BP      | -0.957846385 | 0.014362961 |
| ENSG00000128602 | SMO          | -2.47765222  | 0.014538935 |
| ENSG00000140092 | FBLN5        | -2.600765358 | 0.014558065 |
| ENSG00000273192 |              | -1.08003371  | 0.014558065 |
| ENSG00000162032 | SPSB3        | -0.464910746 | 0.014732074 |
| ENSG00000125356 | NDUFA1       | -0.455288831 | 0.01475699  |
| ENSG00000257151 | PWAR6        | -1.432849402 | 0.014785091 |
| ENSG00000204564 | C6orf136     | -0.538589027 | 0.014811965 |
| ENSG00000228224 | NACAP1       | -0.739638833 | 0.014834346 |
| ENSG00000225151 | GOLGA2P7     | -1.565221751 | 0.014834346 |
| ENSG00000167555 | ZNF528       | -0.992826985 | 0.014834346 |
| ENSG00000064651 | SLC12A2      | -0.793090469 | 0.014917375 |
| ENSG00000182196 | ARL6IP4      | -0.952481405 | 0.015075074 |
| ENSG00000134709 | HOOK1        | -2.319506226 | 0.015107209 |
| ENSG00000102901 | CENPT        | -0.468266771 | 0.015117836 |
| ENSG00000139725 | RHOF         | -0.580107087 | 0.015132893 |
| ENSG00000211649 | IGLV7-46     | -3.531368153 | 0.015286754 |
| ENSG00000137449 | CPEB2        | 0.888801964  | 0.01530045  |
| ENSG00000124507 | PACSIN1      | -3.250094497 | 0.01530045  |
| ENSG00000176058 | TPRN         | -0.729942091 | 0.01530045  |
| ENSG00000166166 | TRMT61A      | -0.526308335 | 0.01530045  |
| ENSG00000213977 | TAX1BP3      | -0.780254217 | 0.01530045  |
| ENSG00000168610 | STAT3        | 0.627057265  | 0.01530045  |
| ENSG00000196684 | HSH2D        | 1.097571501  | 0.01530045  |
| ENSG00000186806 | VSIG10L      | 1.094711625  | 0.01530045  |
| ENSG00000245904 |              | -0.995704509 | 0.015323231 |
| ENSG00000196998 | WDR45        | -0.375541741 | 0.015340111 |
| ENSG00000095139 | ARCN1        | 0.669919323  | 0.01539867  |
| ENSG00000152154 | TMEM178A     | -2.620103925 | 0.015501269 |
| ENSG00000141576 | RNF157       | -1.207778393 | 0.015555059 |
| ENSG00000148290 | SURF1        | -0.443691169 | 0.015577545 |
| ENSG00000278740 |              | -2.274704525 | 0.015577545 |
| ENSG00000143185 | XCL2         | -3.599545714 | 0.015751381 |
| ENSG00000118640 | VAMP8        | -0.606932233 | 0.015751381 |
| ENSG00000144199 | FAHD2B       | -1.343568358 | 0.015790049 |
| ENSG00000234771 | SLC25A25-AS1 | -0.68349797  | 0.015790049 |
| ENSG00000144659 | SLC25A38     | -0.550482755 | 0.015833578 |
| ENSG00000211970 | IGHV4-61     | -3.507718434 | 0.015879956 |
| ENSG00000145431 | PDGFC        | -1.318507701 | 0.015933389 |
| ENSG00000006062 | MAP3K14      | -0.474045138 | 0.015933389 |
| ENSG00000161010 | MRNIP        | -0.970403607 | 0.015979724 |
| ENSG00000171219 | CDC42BPG     | 2.720608889  | 0.015989686 |
| ENSG00000274227 |              | -1.37366901  | 0.015989686 |
| ENSG00000243477 | NAT6         | -0.585740782 | 0.016012226 |
| ENSG00000138443 | ABI2         | -0.745451512 | 0.016092459 |

|                 |          |              |             |
|-----------------|----------|--------------|-------------|
| ENSG00000163872 | YEATS2   | 0.48064512   | 0.016092459 |
| ENSG00000131876 | SNRPA1   | -0.593698081 | 0.016092459 |
| ENSG00000160917 | CPSF4    | -0.38248416  | 0.016274831 |
| ENSG00000271895 |          | -0.94121064  | 0.016288805 |
| ENSG00000131469 | RPL27    | -0.45630887  | 0.016304221 |
| ENSG00000263528 | IKBKE    | 0.810852139  | 0.016342747 |
| ENSG00000117543 | DPH5     | -0.6276373   | 0.016344359 |
| ENSG00000143344 | RGL1     | 2.221136158  | 0.016534809 |
| ENSG00000134070 | IRAK2    | 3.119286725  | 0.016534809 |
| ENSG00000153560 | UBP1     | 0.526902565  | 0.016650644 |
| ENSG00000238105 | GOLGA2P5 | -1.202551167 | 0.016650644 |
| ENSG00000265100 |          | -1.356446539 | 0.016650644 |
| ENSG00000099800 | TIMM13   | -0.749442818 | 0.016650644 |
| ENSG00000173706 | HEG1     | 0.970456093  | 0.016654306 |
| ENSG00000167664 | TMIGD2   | -1.908609514 | 0.016661754 |
| ENSG00000106992 | AK1      | -1.287630367 | 0.016663329 |
| ENSG00000232022 | FAAHP1   | -2.037324409 | 0.016671838 |
| ENSG00000184083 | FAM120C  | -0.673984701 | 0.016671838 |
| ENSG00000130119 | GNL3L    | 0.718507143  | 0.016671838 |
| ENSG00000243678 | NME2     | -0.71329529  | 0.016671838 |
| ENSG00000218891 | ZNF579   | -1.011762189 | 0.016674018 |
| ENSG00000007312 | CD79B    | -1.218079983 | 0.016712204 |
| ENSG00000211895 | IGHA1    | -3.770559918 | 0.016766434 |
| ENSG00000179715 | PCED1B   | -1.164952896 | 0.016774318 |
| ENSG00000152969 | JAKMIP1  | -3.326069988 | 0.016796722 |
| ENSG00000133398 | MED10    | -0.446388581 | 0.016838577 |
| ENSG00000126012 | KDM5C    | 0.441850841  | 0.016902087 |
| ENSG00000137502 | RAB30    | -1.489518732 | 0.016906639 |
| ENSG00000181036 | FCRL6    | -2.954016753 | 0.016913816 |
| ENSG00000273066 |          | -1.115420026 | 0.016967723 |
| ENSG00000185641 |          | -0.722022497 | 0.017013121 |
| ENSG00000260136 |          | -1.1586933   | 0.017013121 |
| ENSG00000111786 | SRSF9    | -0.290775124 | 0.01716427  |
| ENSG00000136718 | IMP4     | -0.447974818 | 0.017191643 |
| ENSG00000107672 | NSMCE4A  | -0.530124376 | 0.017191643 |
| ENSG00000164904 | ALDH7A1  | -1.637303333 | 0.017204497 |
| ENSG00000174775 | HRAS     | -0.608484071 | 0.017204497 |
| ENSG00000213741 | RPS29    | -0.609704231 | 0.017272022 |
| ENSG00000256060 | TRAPPC2B | -0.890904051 | 0.017272022 |
| ENSG00000164406 | LEAP2    | -1.156953371 | 0.017356553 |
| ENSG00000179085 | DPM3     | -0.657218469 | 0.01736454  |
| ENSG00000131368 | MRPS25   | -0.572713299 | 0.017405633 |
| ENSG00000242660 |          | -1.084394867 | 0.017591376 |
| ENSG00000108773 | KAT2A    | -0.691814886 | 0.017591376 |
| ENSG00000103253 | HAGHL    | -1.105040543 | 0.017644567 |
| ENSG00000135185 | TMEM243  | -0.534280262 | 0.017692163 |
| ENSG00000234444 | ZNF736   | -0.568903991 | 0.017776319 |
| ENSG00000275764 |          | -0.67758894  | 0.017776546 |

|                 |          |              |             |
|-----------------|----------|--------------|-------------|
| ENSG00000175262 | C1orf127 | -1.068850696 | 0.017884059 |
| ENSG00000138688 | KIAA1109 | 0.578015415  | 0.017884059 |
| ENSG00000134545 | KLRC1    | -3.060498156 | 0.017884059 |
| ENSG00000160948 | VPS28    | -0.482331785 | 0.017912834 |
| ENSG00000198680 | TUSC1    | -1.63488801  | 0.017912834 |
| ENSG00000244380 |          | -1.210808817 | 0.017913014 |
| ENSG00000279088 |          | -0.7841835   | 0.017913014 |
| ENSG00000214140 | PRCD     | -3.55381793  | 0.017913014 |
| ENSG00000160113 | NR2F6    | -1.212454217 | 0.017945887 |
| ENSG00000165775 | FUNDC2   | -0.418516625 | 0.018028659 |
| ENSG00000086619 | ERO1B    | -0.585984108 | 0.018068441 |
| ENSG00000105443 | CYTH2    | -0.466271863 | 0.018074086 |
| ENSG00000090971 | NAT14    | -0.839564025 | 0.01810492  |
| ENSG00000027075 | PRKCH    | -0.683584209 | 0.018111054 |
| ENSG00000266998 |          | -1.625654577 | 0.018288125 |
| ENSG00000224420 | ADM5     | -1.025623561 | 0.018441558 |
| ENSG00000275055 |          | -1.160901851 | 0.018536175 |
| ENSG00000173818 | ENDOV    | -0.614846388 | 0.018655075 |
| ENSG00000215421 | ZNF407   | 0.484096377  | 0.018655075 |
| ENSG00000057757 | PITHD1   | -0.534868587 | 0.018773235 |
| ENSG00000203791 | METTL10  | -0.543901435 | 0.018789729 |
| ENSG00000247092 | SNHG10   | -1.005768906 | 0.018809841 |
| ENSG00000116096 | SPR      | -0.969625501 | 0.018816244 |
| ENSG00000066135 | KDM4A    | 0.499997993  | 0.018864213 |
| ENSG00000149970 | CNKSR2   | -2.458232537 | 0.018864213 |
| ENSG00000279576 |          | -2.385761474 | 0.01887525  |
| ENSG00000171428 | NAT1     | 0.969547683  | 0.018880774 |
| ENSG00000278611 |          | -1.463296899 | 0.018880774 |
| ENSG00000012061 | ERCC1    | -0.522775716 | 0.018880774 |
| ENSG00000171680 | PLEKHG5  | -2.557725989 | 0.019029394 |
| ENSG00000074071 | MRPS34   | -0.739213557 | 0.019083891 |
| ENSG00000153827 | TRIP12   | 0.389922822  | 0.019096363 |
| ENSG00000101132 | PFDN4    | -0.597024801 | 0.019096363 |
| ENSG00000271335 |          | -1.052149329 | 0.019336499 |
| ENSG00000253948 |          | -1.081048827 | 0.019360299 |
| ENSG00000101444 | AHCY     | -0.670269235 | 0.019465108 |
| ENSG00000173653 | RCE1     | -0.534707693 | 0.019468974 |
| ENSG00000138385 | SSB      | 0.58752727   | 0.019510674 |
| ENSG00000148334 | PTGES2   | -0.439576683 | 0.019510674 |
| ENSG00000268061 | NAPA-AS1 | -1.312402907 | 0.019510674 |
| ENSG00000241370 | RPP21    | -0.727817679 | 0.019566259 |
| ENSG00000100429 | HDAC10   | -0.663306707 | 0.019566259 |
| ENSG00000102103 | PQBP1    | -0.428839085 | 0.019568386 |
| ENSG00000157500 | APPL1    | 0.524342498  | 0.019609845 |
| ENSG00000106603 | COA1     | 0.60388005   | 0.019609845 |
| ENSG00000181074 | OR52N4   | 4.200486331  | 0.01962332  |
| ENSG00000008324 | SS18L2   | -0.537276551 | 0.019633656 |
| ENSG00000260081 |          | -1.673892894 | 0.019668701 |

|                 |             |              |             |
|-----------------|-------------|--------------|-------------|
| ENSG00000104408 | EIF3E       | -0.441967395 | 0.019908287 |
| ENSG00000230629 | RPS23P8     | -0.677825922 | 0.019953543 |
| ENSG00000004059 | ARF5        | -0.355552505 | 0.020012146 |
| ENSG00000183826 | BTBD9       | 0.69115264   | 0.020024064 |
| ENSG00000105552 | BCAT2       | -0.681559824 | 0.020066095 |
| ENSG00000248015 |             | -1.806609329 | 0.020078169 |
| ENSG00000124602 | UNC5CL      | -0.856182346 | 0.020130699 |
| ENSG00000153339 | TRAPPC8     | 0.512528972  | 0.020179015 |
| ENSG00000011478 | QPCTL       | -0.732466564 | 0.020200488 |
| ENSG00000258352 |             | -2.125330043 | 0.020205048 |
| ENSG00000132635 | PCED1A      | -0.528318267 | 0.02023885  |
| ENSG00000164405 | UQCRQ       | -0.49806451  | 0.020393923 |
| ENSG00000158062 | UBXN11      | -0.447512591 | 0.020627017 |
| ENSG00000127445 | PIN1        | -0.41622989  | 0.020669226 |
| ENSG00000108700 | CCL8        | 4.226346124  | 0.020937793 |
| ENSG00000151131 | C12orf45    | -0.578411949 | 0.020964103 |
| ENSG00000180902 | D2HGDH      | -0.831927348 | 0.021049121 |
| ENSG00000196756 | SNHG17      | -0.679295818 | 0.02112766  |
| ENSG00000165949 | IFI27       | 4.770825258  | 0.021135298 |
| ENSG00000095066 | HOOK2       | -0.664706979 | 0.021227486 |
| ENSG00000130770 | ATPIF1      | -0.4965366   | 0.021237623 |
| ENSG00000239855 | IGKV1-6     | -3.375942046 | 0.021303799 |
| ENSG00000100393 | EP300       | 0.549368911  | 0.021388682 |
| ENSG00000169902 | TPST1       | 2.406367558  | 0.021675445 |
| ENSG00000089289 | IGBP1       | -0.365223557 | 0.021732681 |
| ENSG00000179526 | SHARPIN     | -0.464015576 | 0.02174475  |
| ENSG00000242259 | C22orf39    | -0.477965785 | 0.021754934 |
| ENSG00000142089 | IFITM3      | 1.848748676  | 0.021904001 |
| ENSG00000207110 | RNU1-106P   | -2.150701395 | 0.02193966  |
| ENSG00000239951 | IGKV3-20    | -2.719894061 | 0.021964437 |
| ENSG00000248124 | RRN3P1      | -0.723521661 | 0.021980056 |
| ENSG00000128191 | DGCR8       | -0.445673273 | 0.021983008 |
| ENSG00000165914 | TTC7B       | 0.899027111  | 0.022018751 |
| ENSG00000038219 | BOD1L1      | 0.59881334   | 0.022030571 |
| ENSG00000060140 | STYK1       | -3.490852114 | 0.022077729 |
| ENSG00000170906 | NDUFA3      | -0.466914138 | 0.022114575 |
| ENSG00000176101 | SSNA1       | -0.527596025 | 0.022180152 |
| ENSG00000054690 | PLEKHH1     | 1.179106108  | 0.022366335 |
| ENSG00000273759 |             | -1.389663899 | 0.022366335 |
| ENSG00000008128 | CDK11A      | -0.661219865 | 0.022470092 |
| ENSG00000185187 | SIGIRR      | -0.597020231 | 0.022470092 |
| ENSG00000105677 | TMEM147     | -0.514631162 | 0.022617544 |
| ENSG00000261416 |             | -0.743872654 | 0.022847321 |
| ENSG00000226419 | SLC16A1-AS1 | -0.59680562  | 0.022882342 |
| ENSG00000160131 | VMA21       | -0.424717368 | 0.022882342 |
| ENSG00000050426 | LETMD1      | -0.514785631 | 0.022883852 |
| ENSG00000183763 | TRAIP       | -1.366846428 | 0.022910014 |
| ENSG00000164048 | ZNF589      | -0.710868126 | 0.022916539 |

|                 |            |              |             |
|-----------------|------------|--------------|-------------|
| ENSG0000083838  | ZNF446     | -0.561847927 | 0.022922934 |
| ENSG00000266340 |            | -1.228944183 | 0.022948669 |
| ENSG00000268713 |            | -0.724836241 | 0.023065269 |
| ENSG00000213066 | FGFR1OP    | -0.727638304 | 0.023151449 |
| ENSG00000280325 |            | -1.149338207 | 0.023299174 |
| ENSG00000255760 |            | -1.565508151 | 0.023299174 |
| ENSG00000103363 | TCEB2      | -0.531490165 | 0.023394081 |
| ENSG00000272221 |            | -1.56219835  | 0.023413879 |
| ENSG00000174109 | C16orf91   | -0.630689789 | 0.023529239 |
| ENSG00000265241 | RBM8A      | -0.328568895 | 0.023582225 |
| ENSG00000234389 |            | -2.778933482 | 0.023634995 |
| ENSG00000277511 |            | 1.541838154  | 0.023634995 |
| ENSG00000202198 |            | -1.454250762 | 0.023697983 |
| ENSG00000123338 | NCKAP1L    | 0.45373088   | 0.023697983 |
| ENSG00000135636 | DYSF       | 1.700525736  | 0.023771406 |
| ENSG00000271964 |            | -1.568971033 | 0.023771406 |
| ENSG00000243449 | C4orf48    | -1.020338705 | 0.023771406 |
| ENSG00000147155 | EBP        | -0.61772847  | 0.023771406 |
| ENSG00000159399 | HK2        | 0.626258385  | 0.023851496 |
| ENSG00000105583 | WDR83OS    | -0.414973876 | 0.023851496 |
| ENSG00000231584 | FAHD2CP    | -1.220708606 | 0.023855496 |
| ENSG00000248019 | FAM13A-AS1 | -0.581646659 | 0.023855496 |
| ENSG00000109390 | NDUFC1     | -0.53457162  | 0.023855496 |
| ENSG00000145592 | RPL37      | -0.453959462 | 0.024162562 |
| ENSG00000175602 | CCDC85B    | -0.666596767 | 0.024201645 |
| ENSG00000183617 | MRPL54     | -0.601750994 | 0.024201645 |
| ENSG00000105379 | ETFB       | -0.557088643 | 0.024201645 |
| ENSG00000100226 | GTPBP1     | 0.860357193  | 0.024258111 |
| ENSG00000233483 |            | -3.000399729 | 0.024368275 |
| ENSG00000272533 | SNORA28    | 1.931306279  | 0.024373057 |
| ENSG00000198556 | ZNF789     | -0.647327969 | 0.024401395 |
| ENSG00000087460 | GNAS       | -0.282287506 | 0.024401395 |
| ENSG00000129515 | SNX6       | 0.508605882  | 0.02440616  |
| ENSG00000127415 | IDUA       | -0.545859643 | 0.024551469 |
| ENSG00000120733 | KDM3B      | 0.438746364  | 0.024564399 |
| ENSG00000213442 | RPL18AP3   | -0.597550007 | 0.024569108 |
| ENSG00000217094 | PPIAP31    | -0.489413968 | 0.024617783 |
| ENSG00000168101 | NUDT16L1   | -0.508281781 | 0.024765368 |
| ENSG00000260793 |            | -0.691976833 | 0.024765368 |
| ENSG00000266402 | SNHG25     | -1.096040587 | 0.024765368 |
| ENSG00000100379 | KCTD17     | -0.717785173 | 0.024765368 |
| ENSG00000142856 | ITGB3BP    | -0.879563266 | 0.024801954 |
| ENSG00000103037 | SETD6      | -0.605072025 | 0.024838144 |
| ENSG00000184702 | Sep-05     | 4.670108675  | 0.02489078  |
| ENSG00000188690 | UROS       | -0.439894774 | 0.024999856 |
| ENSG00000130165 | ELOF1      | -0.533120665 | 0.025007238 |
| ENSG00000211799 | TRAV19     | -3.018557236 | 0.02501746  |
| ENSG00000177548 | RABEP2     | -0.547405608 | 0.025031193 |

|                 |           |              |             |
|-----------------|-----------|--------------|-------------|
| ENSG00000115750 | TAF1B     | 0.661856621  | 0.025236953 |
| ENSG00000177272 | KCNA3     | 1.044102485  | 0.025240999 |
| ENSG00000267074 |           | -2.394314047 | 0.025240999 |
| ENSG00000249855 | EEF1A1P19 | -0.730287065 | 0.025253359 |
| ENSG00000134313 | KIDINS220 | 0.538479177  | 0.025324746 |
| ENSG00000067829 | IDH3G     | -0.301618797 | 0.025430056 |
| ENSG00000103254 | FAM173A   | -0.927221358 | 0.025566554 |
| ENSG00000053501 | USE1      | -0.4832401   | 0.025566554 |
| ENSG00000182173 | TSEN54    | -0.706992645 | 0.025744107 |
| ENSG00000115042 | FAHD2A    | -0.563994819 | 0.025773698 |
| ENSG00000243466 | IGKV1-5   | -2.781513217 | 0.025848782 |
| ENSG00000126768 | TIMM17B   | -0.409820478 | 0.025848782 |
| ENSG00000204344 | STK19     | -0.519017861 | 0.025894128 |
| ENSG00000107537 | PHYH      | -0.634643832 | 0.025894128 |
| ENSG00000124243 | BCAS4     | -1.002085367 | 0.025916237 |
| ENSG00000179954 | SSC5D     | -1.765948635 | 0.025981434 |
| ENSG00000198546 | ZNF511    | -0.428775611 | 0.026051472 |
| ENSG00000140030 | GPR65     | 0.7729409    | 0.026108199 |
| ENSG00000117410 | ATP6V0B   | -0.484516882 | 0.02615247  |
| ENSG00000117228 | GBP1      | 1.651625141  | 0.02615247  |
| ENSG00000268403 |           | -0.747181123 | 0.02615247  |
| ENSG00000152766 | ANKRD22   | 1.646745787  | 0.02615247  |
| ENSG00000131979 | GCH1      | 0.716517277  | 0.02615247  |
| ENSG00000006282 | SPATA20   | -0.829620121 | 0.02615247  |
| ENSG00000250506 | CDK3      | -0.952524997 | 0.02615247  |
| ENSG00000229299 |           | -1.395536895 | 0.02615247  |
| ENSG00000100483 | VCPKMT    | -0.648172718 | 0.026160239 |
| ENSG00000164114 | MAP9      | -2.175604169 | 0.0261846   |
| ENSG00000134516 | DOCK2     | 0.441522733  | 0.0261846   |
| ENSG00000156508 | EEF1A1    | -0.475740995 | 0.0261846   |
| ENSG00000162654 | GBP4      | 1.243618971  | 0.026437529 |
| ENSG00000005810 | MYCBP2    | 0.504227306  | 0.02654205  |
| ENSG00000270170 | NCBP2-AS2 | -0.548623003 | 0.02655931  |
| ENSG00000085465 | OVGP1     | -1.160938159 | 0.026573702 |
| ENSG00000129484 | PARP2     | -0.691438455 | 0.026573702 |
| ENSG00000103485 | QPRT      | -0.898589475 | 0.026573702 |
| ENSG00000104964 | AES       | -0.427359696 | 0.026574843 |
| ENSG00000162415 | ZSWIM5    | -2.559771739 | 0.026613747 |
| ENSG00000243244 | STON1     | -0.906717588 | 0.026613747 |
| ENSG00000126262 | FFAR2     | 1.838254989  | 0.026613747 |
| ENSG00000100596 | SPTLC2    | 0.823111971  | 0.026648202 |
| ENSG00000276259 |           | -1.140236704 | 0.026648202 |
| ENSG00000140853 | NLRC5     | 0.588146336  | 0.026665938 |
| ENSG00000069493 | CLEC2D    | -0.772199969 | 0.026715137 |
| ENSG00000072195 | SPEG      | -1.707509795 | 0.026798481 |
| ENSG00000173762 | CD7       | -0.887402753 | 0.026843681 |
| ENSG00000169592 | INO80E    | -0.680623857 | 0.026884029 |
| ENSG00000279377 |           | -3.228588384 | 0.026946663 |

|                 |              |              |             |
|-----------------|--------------|--------------|-------------|
| ENSG00000120699 | EXOSC8       | -0.495694196 | 0.027067486 |
| ENSG00000135930 | EIF4E2       | -0.334957596 | 0.027132009 |
| ENSG00000218426 |              | -0.566652354 | 0.027132009 |
| ENSG00000135144 | DTX1         | -2.360087427 | 0.027132009 |
| ENSG00000174365 | SNHG11       | -0.601499649 | 0.027132009 |
| ENSG00000204136 | GGTA1P       | -1.548244445 | 0.027168336 |
| ENSG00000173141 | MRPL57       | -0.545204375 | 0.027218216 |
| ENSG00000171476 | HOPX         | -1.814377133 | 0.02725711  |
| ENSG00000153815 | CMIP         | 0.446230822  | 0.02725711  |
| ENSG00000099840 | IZUMO4       | -0.761666539 | 0.02725711  |
| ENSG00000174718 | KIAA1551     | 0.801038844  | 0.027293241 |
| ENSG00000125611 | CHCHD5       | -0.596177327 | 0.027449928 |
| ENSG00000274943 |              | -1.251394839 | 0.027449928 |
| ENSG00000151773 | CCDC122      | -0.999013396 | 0.027559353 |
| ENSG00000226360 | RPL10AP6     | -0.78768006  | 0.027649747 |
| ENSG00000115307 | AUP1         | -0.266297755 | 0.027976139 |
| ENSG00000129559 | NEDD8        | -0.442027223 | 0.028238449 |
| ENSG00000168890 | TMEM150A     | -0.582318444 | 0.028273716 |
| ENSG00000244733 |              | -0.93714824  | 0.028307948 |
| ENSG00000011028 | MRC2         | -2.970589196 | 0.028437908 |
| ENSG00000112294 | ALDH5A1      | -1.585114286 | 0.028502674 |
| ENSG00000214535 | RPS15AP1     | -0.78077908  | 0.028502674 |
| ENSG00000159374 | M1AP         | -0.956396706 | 0.028673255 |
| ENSG00000102554 | KLF5         | 2.351671248  | 0.02875739  |
| ENSG00000113161 | HMGCR        | 0.529940949  | 0.028764719 |
| ENSG00000182154 | MRPL41       | -0.731952208 | 0.028781917 |
| ENSG00000182010 | RTKN2        | -1.804522747 | 0.028930998 |
| ENSG00000167107 | ACSF2        | -0.76704756  | 0.028960748 |
| ENSG00000218227 |              | -0.546770316 | 0.029115269 |
| ENSG00000218208 | RPS27AP11    | -1.482902823 | 0.02955142  |
| ENSG00000256039 |              | -2.381107855 | 0.02955142  |
| ENSG00000260778 | MIR940       | -1.170978183 | 0.02955142  |
| ENSG00000109927 | TECTA        | 1.566860643  | 0.029701385 |
| ENSG00000177732 | SOX12        | -0.922954635 | 0.029830304 |
| ENSG00000110777 | POU2AF1      | -1.398913506 | 0.029950324 |
| ENSG00000035720 | STAP1        | 2.025980146  | 0.029990802 |
| ENSG00000213366 | GSTM2        | -0.893209751 | 0.030044717 |
| ENSG00000138031 | ADCY3        | 1.254956405  | 0.030417542 |
| ENSG00000204852 | TCTN1        | -0.761580057 | 0.030417542 |
| ENSG00000037749 | MFAP3        | 0.77347169   | 0.030526444 |
| ENSG00000100100 | PIK3IP1      | -0.88295031  | 0.030526444 |
| ENSG00000275832 | ARHGAP23     | 1.352456469  | 0.030574038 |
| ENSG00000224032 | EPB41L4A-AS1 | -0.690196819 | 0.030603847 |
| ENSG00000139626 | ITGB7        | 0.88692263   | 0.030603847 |
| ENSG00000233276 | GPX1         | -0.686458178 | 0.030638697 |
| ENSG00000159714 | ZDHHC1       | -1.665590938 | 0.030669032 |
| ENSG00000183401 | CCDC159      | -0.541278862 | 0.03069316  |
| ENSG00000123219 | CENPK        | -1.610867724 | 0.030743588 |

|                 |           |              |             |
|-----------------|-----------|--------------|-------------|
| ENSG00000100345 | MYH9      | 0.597007844  | 0.030743588 |
| ENSG00000084623 | EIF3I     | -0.416293458 | 0.030748141 |
| ENSG00000171453 | POLR1C    | -0.646887259 | 0.030924664 |
| ENSG00000100417 | PMM1      | -0.47264246  | 0.030924898 |
| ENSG00000112378 | PERP      | -2.635919782 | 0.03095675  |
| ENSG00000007080 | CCDC124   | -0.466497542 | 0.03095675  |
| ENSG00000276819 | TRBV15    | -3.145480665 | 0.030959377 |
| ENSG00000270550 | IGHV3-30  | -2.957175826 | 0.030980999 |
| ENSG00000251259 |           | -0.675131068 | 0.031101143 |
| ENSG00000272936 |           | -1.075203312 | 0.031194165 |
| ENSG00000214941 | ZSWIM7    | -0.594116675 | 0.031194165 |
| ENSG00000274104 |           | -0.910782647 | 0.031194165 |
| ENSG00000189403 | HMGB1     | -0.453300593 | 0.031260233 |
| ENSG00000255987 | TOMM20P2  | -3.003159261 | 0.031260233 |
| ENSG00000169885 | CALML6    | -2.07770488  | 0.031301221 |
| ENSG00000136149 | RPL13AP25 | -0.875344528 | 0.031360857 |
| ENSG00000137501 | SYTL2     | -1.024627903 | 0.031654105 |
| ENSG00000182957 | SPATA13   | 0.620572627  | 0.031654105 |
| ENSG00000211706 | TRBV6-1   | -3.141847884 | 0.031793589 |
| ENSG00000100403 | ZC3H7B    | 0.41059234   | 0.031793589 |
| ENSG00000154511 | FAM69A    | 0.942666024  | 0.03179971  |
| ENSG00000196131 | VN1R2     | -1.355878047 | 0.03179971  |
| ENSG00000211767 | TRBJ2-3   | -3.139457305 | 0.03189769  |
| ENSG00000185972 | CCIN      | -1.214521614 | 0.031949625 |
| ENSG00000163041 | H3F3A     | -0.341386509 | 0.03204973  |
| ENSG00000175283 | DOLK      | 0.864708389  | 0.032067566 |
| ENSG00000232613 |           | -3.126739335 | 0.032087895 |
| ENSG00000105875 | WDR91     | -0.500434143 | 0.032105275 |
| ENSG00000255857 | PXN-AS1   | -1.156244751 | 0.032110066 |
| ENSG00000005436 | GCFC2     | -0.547052323 | 0.032224574 |
| ENSG00000262484 | CCER2     | -1.238904014 | 0.032293073 |
| ENSG00000241741 | RPL7AP30  | -0.54297574  | 0.032676997 |
| ENSG00000204977 | TRIM13    | -0.703229421 | 0.032676997 |
| ENSG00000073605 | GSDMB     | -0.916128152 | 0.032676997 |
| ENSG00000205089 | CCNI2     | -3.132477657 | 0.032699469 |
| ENSG00000213654 | GPSM3     | -0.350420323 | 0.032699469 |
| ENSG00000228623 | ZNF883    | -1.666408122 | 0.032699469 |
| ENSG00000176994 | SMCR8     | 0.614262407  | 0.032762852 |
| ENSG00000013306 | SLC25A39  | -0.406357824 | 0.032994327 |
| ENSG00000177954 | RPS27     | -0.508490461 | 0.03302649  |
| ENSG00000282133 | TRBJ1-3   | -3.122122768 | 0.03302649  |
| ENSG00000013288 | MAN2B2    | 0.458291424  | 0.033037605 |
| ENSG00000215252 | GOLGA8B   | -0.960610528 | 0.033108971 |
| ENSG00000272106 |           | -0.544321447 | 0.033155345 |
| ENSG00000174669 | SLC29A2   | -0.778754721 | 0.033155345 |
| ENSG00000223496 | EXOSC6    | -0.60991536  | 0.033155345 |
| ENSG00000176171 | BNIP3     | -0.714475273 | 0.033256389 |
| ENSG00000274712 |           | -0.79595103  | 0.033330956 |



|                 |              |              |             |
|-----------------|--------------|--------------|-------------|
| ENSG00000255569 | TRAV1-1      | -3.157950142 | 0.033368408 |
| ENSG00000183049 | CAMK1D       | -0.527030404 | 0.033368662 |
| ENSG00000267787 |              | 0.735793459  | 0.033478936 |
| ENSG00000232586 | KIAA1614-AS1 | 1.348247254  | 0.033492287 |
| ENSG00000213533 | TMEM110      | 0.744363971  | 0.033620468 |
| ENSG00000087191 | PSMC5        | -0.391997405 | 0.033733249 |
| ENSG00000196642 | RABL6        | -0.356265258 | 0.033745323 |
| ENSG00000177700 | POLR2L       | -0.603986621 | 0.033789369 |
| ENSG00000169740 | ZNF32        | -0.471885165 | 0.033860637 |
| ENSG00000133466 | C1QTNF6      | -0.916499763 | 0.033862151 |
| ENSG00000154153 | FAM134B      | 1.041060832  | 0.033871397 |
| ENSG00000122034 | GTF3A        | -0.386096365 | 0.033902402 |
| ENSG00000114923 | SLC4A3       | -2.051646499 | 0.033909632 |
| ENSG00000185495 |              | -0.84349115  | 0.033927887 |
| ENSG00000124374 | PAIP2B       | -1.228347126 | 0.033969352 |
| ENSG00000238578 | SNORD4A      | -0.922500975 | 0.034027811 |
| ENSG00000159884 | CCDC107      | -0.574303765 | 0.034072779 |
| ENSG00000128253 | RFPL2        | -2.198988304 | 0.034094497 |
| ENSG00000182827 | ACBD3        | 0.610083456  | 0.034193911 |
| ENSG00000095787 | WAC          | 0.350905793  | 0.034205993 |
| ENSG00000267128 |              | -3.170802408 | 0.034232141 |
| ENSG00000280033 |              | -0.950904987 | 0.034287409 |
| ENSG00000165813 | CCDC186      | 0.623636172  | 0.034411608 |
| ENSG00000211765 | TRBJ2-2      | -3.127492404 | 0.03460093  |
| ENSG00000001497 | LAS1L        | -0.335848855 | 0.03460093  |
| ENSG00000107014 | RLN2         | -3.124462695 | 0.034609656 |
| ENSG00000196557 | CACNA1H      | -3.13753811  | 0.034682679 |
| ENSG00000135423 | GLS2         | -3.134050793 | 0.034688976 |
| ENSG00000182195 | LDOC1        | -2.564106141 | 0.034741283 |
| ENSG00000234936 |              | -1.215175687 | 0.034762409 |
| ENSG00000224650 | IGHV3-74     | -3.013773143 | 0.034804186 |
| ENSG00000132256 | TRIM5        | 1.293361757  | 0.034851519 |
| ENSG00000119862 | LGALSL       | -1.980550104 | 0.034865078 |
| ENSG00000171049 | FPR2         | 1.784377785  | 0.03487645  |
| ENSG00000103145 | HCFC1R1      | -0.580117969 | 0.034891638 |
| ENSG00000120899 | PTK2B        | 0.419871291  | 0.034929569 |
| ENSG00000274349 | ZNF658       | 1.776641156  | 0.034967937 |
| ENSG00000164151 | ICE1         | 0.430903588  | 0.034988015 |
| ENSG00000127054 | CPSF3L       | -0.350677884 | 0.035066143 |
| ENSG00000166669 | ATF7IP2      | -0.586445406 | 0.035067442 |
| ENSG00000125901 | MRPS26       | -0.637862287 | 0.035067442 |
| ENSG00000084072 | PPIE         | -0.906582112 | 0.035143519 |
| ENSG00000213889 | PPM1N        | -1.131579967 | 0.035212093 |
| ENSG00000131504 | DIAPH1       | 0.451591587  | 0.035247204 |
| ENSG00000166317 | SYNPO2L      | -1.023135003 | 0.035247204 |
| ENSG00000211941 | IGHV3-11     | -3.140047156 | 0.035247204 |
| ENSG00000175886 | RPL7AP66     | -0.900023271 | 0.035317555 |
| ENSG00000204311 | DFNB59       | -1.283434607 | 0.035362496 |

|                 |             |              |             |
|-----------------|-------------|--------------|-------------|
| ENSG00000273428 |             | -2.552165904 | 0.035362496 |
| ENSG00000183762 | KREMEN1     | 1.345888704  | 0.035488619 |
| ENSG00000187608 | ISG15       | 1.574771231  | 0.035526645 |
| ENSG00000106537 | TSPAN13     | -1.752663132 | 0.035546336 |
| ENSG00000104133 | SPG11       | 0.540094832  | 0.035546336 |
| ENSG00000165996 | HACD1       | 1.579230811  | 0.035559015 |
| ENSG00000033178 | UBA6        | 0.415569765  | 0.035559978 |
| ENSG00000250318 |             | -0.949237485 | 0.03568527  |
| ENSG00000173915 | USMG5       | -0.480903549 | 0.035790317 |
| ENSG00000198840 | MT-ND3      | -0.637821133 | 0.035790317 |
| ENSG00000165113 | GKAP1       | -0.844105722 | 0.035813908 |
| ENSG00000162191 | UBXN1       | -0.397399403 | 0.035830161 |
| ENSG00000157734 | SNX22       | -1.134628183 | 0.035852094 |
| ENSG00000105135 | ILVBL       | -0.614590821 | 0.035878418 |
| ENSG00000206573 | THUMPD3-AS1 | -0.50434949  | 0.035878721 |
| ENSG00000225783 | MIAT        | -1.514720714 | 0.035903707 |
| ENSG00000010818 | HIVEP2      | 0.707613798  | 0.035934976 |
| ENSG00000213398 | LCAT        | -0.610943667 | 0.035934976 |
| ENSG00000210154 | MT-TD       | -1.252216756 | 0.03613769  |
| ENSG00000004487 | KDM1A       | -0.325836012 | 0.036151703 |
| ENSG00000160058 | BSDC1       | 0.386309303  | 0.036151703 |
| ENSG00000162714 | ZNF496      | 0.797889866  | 0.036151703 |
| ENSG00000166394 | CYB5R2      | 2.156661439  | 0.036151703 |
| ENSG00000256525 | POLG2       | -0.595708069 | 0.036375289 |
| ENSG00000228863 |             | -0.916112411 | 0.036647666 |
| ENSG00000272282 |             | -3.14211798  | 0.036647666 |
| ENSG00000066084 | DIP2B       | 0.623097424  | 0.036647666 |
| ENSG00000240403 | KIR3DL2     | -3.01134738  | 0.036647666 |
| ENSG00000242252 | BGLAP       | -1.303679641 | 0.036820939 |
| ENSG00000151923 | TIAL1       | -0.350926698 | 0.036966771 |
| ENSG00000259865 |             | -0.615671285 | 0.037040779 |
| ENSG00000225663 | MCRIP1      | -0.506342952 | 0.037040779 |
| ENSG00000165637 | VDAC2       | -0.405267524 | 0.037064592 |
| ENSG00000175634 | RPS6KB2     | -0.359565405 | 0.037097045 |
| ENSG00000129244 | ATP1B2      | 2.452024696  | 0.037097045 |
| ENSG00000173281 | PPP1R3B     | 1.00650917   | 0.037148637 |
| ENSG00000138942 | RNF185      | 0.438314908  | 0.03717129  |
| ENSG00000110047 | EHD1        | 1.190250834  | 0.037343987 |
| ENSG00000125844 | RRBP1       | 0.760931306  | 0.037419802 |
| ENSG00000164008 | C1orf50     | -0.582178789 | 0.037429087 |
| ENSG00000211943 | IGHV3-15    | -2.766614175 | 0.037449513 |
| ENSG00000204348 | DXO         | -0.608004481 | 0.037464351 |
| ENSG00000226525 | RPS7P10     | -0.665779571 | 0.037464351 |
| ENSG00000104979 | C19orf53    | -0.392887873 | 0.037464351 |
| ENSG00000126215 | XRCC3       | -0.778518787 | 0.037486446 |
| ENSG00000070718 | AP3M2       | -0.755236337 | 0.037567436 |
| ENSG00000050165 | DKK3        | -3.07002126  | 0.037722116 |
| ENSG00000143353 | LYPLAL1     | -0.67515051  | 0.03773692  |

|                 |          |              |             |
|-----------------|----------|--------------|-------------|
| ENSG00000105851 | PIK3CG   | 0.650600721  | 0.037782087 |
| ENSG00000161618 | ALDH16A1 | -0.538054593 | 0.037782087 |
| ENSG00000134193 | REG4     | -3.132365841 | 0.03779011  |
| ENSG00000112851 | ERBIN    | 0.407055497  | 0.03779011  |
| ENSG00000231621 |          | -3.108294666 | 0.037792476 |
| ENSG00000103495 | MAZ      | -0.383223456 | 0.037792476 |
| ENSG00000219665 |          | -0.577610071 | 0.037792476 |
| ENSG00000196456 | ZNF775   | -0.841372749 | 0.037894597 |
| ENSG00000130299 | GTPBP3   | -0.560963736 | 0.038045497 |
| ENSG00000164327 | RICTOR   | 0.577728085  | 0.038089008 |
| ENSG00000242686 |          | -1.980835601 | 0.038230786 |
| ENSG00000211934 | IGHV1-2  | -3.132088986 | 0.038230786 |
| ENSG00000169689 | CENPX    | -0.677395594 | 0.038230786 |
| ENSG00000139610 | CELA1    | -1.856303945 | 0.038291031 |
| ENSG00000196459 | TRAPPC2  | -0.650900414 | 0.038295141 |
| ENSG00000272010 |          | -1.835313899 | 0.038367689 |
| ENSG00000168672 | FAM84B   | -1.180598628 | 0.038423588 |
| ENSG00000067900 | ROCK1    | 0.496609082  | 0.038423588 |
| ENSG00000231793 | DOC2GP   | -2.180461708 | 0.038429123 |
| ENSG00000085831 | TTC39A   | 3.959541993  | 0.038460999 |
| ENSG00000106400 | ZNHIT1   | -0.454793794 | 0.038460999 |
| ENSG00000163354 | DCST2    | -0.917820082 | 0.038577925 |
| ENSG00000131495 | NDUFA2   | -0.506561418 | 0.038577925 |
| ENSG00000256453 | DND1     | -0.968704311 | 0.038577925 |
| ENSG00000105649 | RAB3A    | -1.295725834 | 0.038577925 |
| ENSG00000167685 | ZNF444   | -0.539939093 | 0.038577925 |
| ENSG00000211651 | IGLV1-44 | -2.342070004 | 0.038577925 |
| ENSG00000171861 | MRM3     | -0.543922883 | 0.03879922  |
| ENSG00000204314 | PRRT1    | -2.135957472 | 0.038925099 |
| ENSG00000211710 | TRBV4-1  | -2.583422807 | 0.038925858 |
| ENSG00000197381 | ADARB1   | 0.752879288  | 0.038961365 |
| ENSG00000235499 |          | 1.34965032   | 0.039043741 |
| ENSG00000104886 | PLEKHJ1  | -0.591586089 | 0.039043741 |
| ENSG00000125868 | DSTN     | -0.62240147  | 0.039070752 |
| ENSG00000005513 | SOX8     | -3.13322069  | 0.039194706 |
| ENSG00000171443 | ZNF524   | -0.57660138  | 0.039247214 |
| ENSG00000180316 | PNPLA1   | 1.508094716  | 0.039253828 |
| ENSG00000167118 | URM1     | -0.352221087 | 0.039253828 |
| ENSG00000127540 | UQCR11   | -0.456021005 | 0.039253828 |
| ENSG00000205726 | ITSN1    | 0.814969215  | 0.039253828 |
| ENSG00000154134 | ROBO3    | -1.100776893 | 0.039299674 |
| ENSG00000141696 | P3H4     | -1.281001714 | 0.039390117 |
| ENSG00000136147 | PHF11    | 0.604548822  | 0.039440758 |
| ENSG00000213145 | CRIP1    | -0.823440506 | 0.039440758 |
| ENSG00000171596 | NMUR1    | -2.218089977 | 0.039540801 |
| ENSG00000079462 | PAFAH1B3 | -0.62658285  | 0.039540801 |
| ENSG00000271869 |          | -0.849887104 | 0.039619223 |
| ENSG00000181038 | METTL23  | -0.400895686 | 0.039619223 |

|                 |           |              |             |
|-----------------|-----------|--------------|-------------|
| ENSG00000234127 | TRIM26    | 0.525215859  | 0.039621182 |
| ENSG00000068305 | MEF2A     | 0.430996933  | 0.039688689 |
| ENSG00000086289 | EPDR1     | 1.976097468  | 0.039701695 |
| ENSG00000109832 | DDX25     | 1.086776017  | 0.039702803 |
| ENSG00000133216 | EPHB2     | 2.16308285   | 0.039724731 |
| ENSG00000120217 | CD274     | 1.243001197  | 0.039751034 |
| ENSG00000256427 |           | -3.133555552 | 0.039751034 |
| ENSG00000260404 |           | 0.813739748  | 0.039797937 |
| ENSG00000111364 | DDX55     | -0.583195421 | 0.039797937 |
| ENSG00000204859 | ZBTB48    | -0.433862951 | 0.039801849 |
| ENSG00000181097 |           | -1.263586778 | 0.039801849 |
| ENSG00000253755 | IGHGP     | -3.00592943  | 0.039860683 |
| ENSG00000183066 | WBP2NL    | -1.017491409 | 0.039860683 |
| ENSG00000173511 | VEGFB     | -1.362026273 | 0.039932513 |
| ENSG00000112695 | COX7A2    | -0.403153351 | 0.040112174 |
| ENSG00000124802 | EEF1E1    | -0.748242645 | 0.040136221 |
| ENSG00000111678 | C12orf57  | -0.665255545 | 0.0402159   |
| ENSG00000089248 | ERP29     | -0.340637481 | 0.040305685 |
| ENSG00000197774 | EME2      | -0.456831248 | 0.040496763 |
| ENSG00000116688 | MFN2      | 0.402679218  | 0.040519935 |
| ENSG00000144061 | NPHP1     | -1.476097749 | 0.040648248 |
| ENSG00000169964 | TMEM42    | -0.724959272 | 0.040709488 |
| ENSG00000245937 | LINC01184 | -0.655871615 | 0.040709488 |
| ENSG00000137411 | VAR2      | -0.683622059 | 0.040709488 |
| ENSG00000120647 | CCDC77    | -0.607987808 | 0.040709488 |
| ENSG00000159618 | ADGRG5    | -1.371534879 | 0.040709488 |
| ENSG00000204435 | CSNK2B    | -0.62467718  | 0.041049268 |
| ENSG00000125900 | SIRPD     | 1.071804264  | 0.041148223 |
| ENSG00000167601 | AXL       | 2.128461992  | 0.041327364 |
| ENSG00000158470 | B4GALT5   | 0.908361385  | 0.041515923 |
| ENSG00000107020 | PLGRKT    | -0.576859872 | 0.041560699 |
| ENSG00000173272 | MZT2A     | -0.661258639 | 0.041601303 |
| ENSG00000142039 | CCDC97    | 0.536404253  | 0.041601303 |
| ENSG00000278376 |           | -0.906271269 | 0.041643198 |
| ENSG00000225450 |           | 1.692333359  | 0.041643198 |
| ENSG00000258301 |           | -0.871121577 | 0.041831183 |
| ENSG00000106333 | PCOLCE    | -0.704478829 | 0.041922642 |
| ENSG00000106028 | SSBP1     | -0.363930247 | 0.042031514 |
| ENSG00000272800 |           | -1.712527844 | 0.042133816 |
| ENSG00000272994 |           | -0.79097072  | 0.042199206 |
| ENSG00000206417 | H1FX-AS1  | -0.942880325 | 0.042202502 |
| ENSG00000276278 |           | -0.848138028 | 0.042286316 |
| ENSG00000116514 | RNF19B    | 0.832445142  | 0.042665573 |
| ENSG00000167702 | KIFC2     | -0.586367448 | 0.042697787 |
| ENSG00000162496 | DHRS3     | -2.953784123 | 0.042812027 |
| ENSG00000136271 | DDX56     | -0.353571533 | 0.042812027 |
| ENSG00000172009 | THOP1     | -0.569723692 | 0.04282179  |
| ENSG00000101945 | SUV39H1   | -0.702152696 | 0.042843327 |

|                 |             |              |             |
|-----------------|-------------|--------------|-------------|
| ENSG00000137877 | SPTBN5      | 1.403632516  | 0.042903445 |
| ENSG00000272821 |             | -0.871258572 | 0.042944917 |
| ENSG00000135632 | SMYD5       | -0.570038878 | 0.043090539 |
| ENSG00000100731 | PCNX1       | 0.483813871  | 0.043090539 |
| ENSG00000242588 |             | 1.055293802  | 0.043117698 |
| ENSG00000225079 | FTH1P22     | -3.140275162 | 0.043390405 |
| ENSG00000126264 | HCST        | -0.654984793 | 0.043390405 |
| ENSG00000233392 |             | -2.558434638 | 0.04353287  |
| ENSG00000107036 | RIC1        | 0.43582337   | 0.043601244 |
| ENSG00000105185 | PDCD5       | -0.532190421 | 0.043712374 |
| ENSG00000165475 | CRYL1       | -0.539781942 | 0.043790511 |
| ENSG00000205937 | RNPS1       | -0.341590993 | 0.043790511 |
| ENSG00000244187 | TMEM141     | -0.685220211 | 0.043860002 |
| ENSG00000159388 | BTG2        | -0.944487292 | 0.043897981 |
| ENSG00000204856 | FAM216A     | -0.84682993  | 0.043897981 |
| ENSG00000137962 | ARHGAP29    | 1.051223956  | 0.043926876 |
| ENSG00000227195 | MIR663AHG   | -1.411534919 | 0.043926876 |
| ENSG00000104881 | PPP1R13L    | -0.780944437 | 0.043926876 |
| ENSG00000197705 | KLHL14      | -2.316990813 | 0.04404741  |
| ENSG00000137038 | TMEM261     | -0.694989459 | 0.044770388 |
| ENSG00000164190 | NIPBL       | 0.406450507  | 0.044985003 |
| ENSG00000198959 | TGM2        | 1.490232505  | 0.044985003 |
| ENSG00000261584 |             | -1.96951796  | 0.045126389 |
| ENSG00000261526 |             | -0.879334188 | 0.045126389 |
| ENSG00000105173 | CCNE1       | -1.187241324 | 0.045126389 |
| ENSG00000142252 | GEMIN7      | -0.802416502 | 0.045209433 |
| ENSG00000106605 | BLVRA       | 0.910923507  | 0.045212033 |
| ENSG00000115944 | COX7A2L     | -0.356609109 | 0.045220017 |
| ENSG00000155640 | NA          | 0.951748226  | 0.0452337   |
| ENSG00000198911 | SREBF2      | 0.468409952  | 0.045313804 |
| ENSG00000162913 | C1orf145    | -2.21393863  | 0.045386569 |
| ENSG00000007541 | PIGQ        | -0.437298481 | 0.045538056 |
| ENSG00000196236 | XPNPEP3     | -0.527608079 | 0.045538056 |
| ENSG00000105393 | BABAM1      | -0.423358927 | 0.04567379  |
| ENSG00000159199 | ATP5G1      | -0.51456978  | 0.045726191 |
| ENSG00000198832 | SELENOM     | -1.121426814 | 0.045900198 |
| ENSG00000104320 | NBN         | 0.741137042  | 0.046047821 |
| ENSG00000096746 | HNRNPH3     | -0.438036113 | 0.046047821 |
| ENSG00000225721 |             | -1.538240325 | 0.046107389 |
| ENSG00000214182 | PTMAP5      | -0.588603403 | 0.046171062 |
| ENSG00000263001 | GTF2I       | 0.574629654  | 0.046399404 |
| ENSG00000138623 | SEMA7A      | -1.368472432 | 0.046754566 |
| ENSG00000250151 | ARPC4-TTLL3 | 1.245367423  | 0.046975622 |
| ENSG00000142156 | COL6A1      | -2.06833588  | 0.047099833 |
| ENSG00000164466 | SFXN1       | -0.616506192 | 0.047297351 |
| ENSG00000178209 | PLEC        | 0.612449371  | 0.047297351 |
| ENSG00000166133 | RPUSD2      | -0.802790943 | 0.047297351 |
| ENSG00000188827 | SLX4        | 0.472253708  | 0.047297351 |

|                 |             |              |             |
|-----------------|-------------|--------------|-------------|
| ENSG0000059769  | DNAJC25     | -0.727050959 | 0.04734267  |
| ENSG00000100348 | TXN2        | -0.431569558 | 0.047433324 |
| ENSG00000259321 |             | -0.893552333 | 0.047544863 |
| ENSG00000135940 | COX5B       | -0.40428577  | 0.047670323 |
| ENSG00000138796 | HADH        | -0.680955157 | 0.047670323 |
| ENSG00000185507 | IRF7        | 1.082613662  | 0.047670323 |
| ENSG00000281026 | N4BP2L2-IT2 | -0.881571941 | 0.047670323 |
| ENSG00000146433 | TMEM181     | -0.477544591 | 0.047703669 |
| ENSG00000099795 | NDUFB7      | -0.525882947 | 0.047841331 |
| ENSG00000231672 | DIRC3       | -1.523878666 | 0.047960102 |
| ENSG00000125386 | FAM193A     | 0.359108794  | 0.047960102 |
| ENSG00000204392 | LSM2        | -0.629947929 | 0.047960102 |
| ENSG00000108465 | CDK5RAP3    | -0.396188459 | 0.047960102 |
| ENSG00000229980 | TOB1-AS1    | -0.975982243 | 0.048004744 |
| ENSG00000231389 | HLA-DPA1    | -1.104625514 | 0.048179614 |
| ENSG00000276997 |             | 0.932703116  | 0.048298129 |
| ENSG00000163510 | CWC22       | 0.462638555  | 0.048298129 |
| ENSG00000130414 | NDUFA10     | -0.315100921 | 0.048298129 |
| ENSG00000090097 | PCBP4       | -0.995523988 | 0.048298129 |
| ENSG00000229119 |             | -0.934256325 | 0.048298129 |
| ENSG00000113761 | ZNF346      | 0.700737438  | 0.048298129 |
| ENSG00000146677 |             | -0.736273637 | 0.048298129 |
| ENSG00000239789 | MRPS17      | -0.600990221 | 0.048298129 |
| ENSG00000279265 |             | -0.835295678 | 0.048298129 |
| ENSG00000253716 | MINCR       | -1.008397938 | 0.048298129 |
| ENSG00000137145 | DENND4C     | 0.502569146  | 0.048298129 |
| ENSG00000136908 | DPM2        | -0.544418804 | 0.048298129 |
| ENSG00000168062 | BATF2       | 2.116146273  | 0.048298129 |
| ENSG00000175463 | TBC1D10C    | -0.501811702 | 0.048298129 |
| ENSG00000205846 | CLEC6A      | 1.25079601   | 0.048298129 |
| ENSG00000123104 | ITPR2       | 0.54579055   | 0.048298129 |
| ENSG00000188735 | TMEM120B    | -0.638201046 | 0.048298129 |
| ENSG00000263264 |             | 0.854515448  | 0.048298129 |
| ENSG00000213923 | CSNK1E      | -0.540789582 | 0.048298129 |
| ENSG00000100413 | POLR3H      | -0.555760907 | 0.048298129 |
| ENSG00000116863 | ADPRHL2     | 0.719165735  | 0.048327459 |
| ENSG00000132549 | VPS13B      | 0.456118001  | 0.048327459 |
| ENSG00000124562 | SNRPC       | -0.435171679 | 0.048385038 |
| ENSG00000211892 | IGHG4       | -3.171870814 | 0.048421228 |
| ENSG00000156453 | PCDH1       | -3.131173973 | 0.048505302 |
| ENSG00000239672 | NME1        | -0.941710009 | 0.048505302 |
| ENSG00000173786 | CNP         | 0.831595126  | 0.048564692 |
| ENSG00000178146 |             | 0.953944381  | 0.048565964 |
| ENSG00000239523 | MYLK-AS1    | -1.295860527 | 0.048618705 |
| ENSG00000131398 | KCNC3       | -0.876916763 | 0.048651234 |
| ENSG00000235174 | RPL39P3     | -0.593208277 | 0.048837099 |
| ENSG00000198265 | HELZ        | 0.432727014  | 0.048936843 |
| ENSG00000172215 | CXCR6       | -3.076835336 | 0.048950544 |

|                 |            |              |             |
|-----------------|------------|--------------|-------------|
| ENSG00000169857 | AVEN       | -0.739128209 | 0.048950544 |
| ENSG00000214087 | ARL16      | -0.675812865 | 0.048950544 |
| ENSG00000152454 | ZNF256     | -0.901045616 | 0.049059893 |
| ENSG00000278356 |            | -1.236502025 | 0.049492704 |
| ENSG00000184384 | MAML2      | 0.687402868  | 0.049581291 |
| ENSG00000165724 | ZMYND19    | -0.668099105 | 0.049640255 |
| ENSG00000236618 | PITPNA-AS1 | -0.985406381 | 0.049640255 |
| ENSG00000107951 | MTPAP      | -0.426214188 | 0.049642973 |
| ENSG00000166557 | TMED3      | -0.430704924 | 0.049642973 |
| ENSG00000100024 | UPB1       | 2.84838004   | 0.049642973 |
| ENSG00000196655 | TRAPPC4    | -0.510673309 | 0.049802622 |
| ENSG00000197057 | DTHD1      | -2.997926109 | 0.049825364 |
