# Supplementary material for: Role of CD14+ monocyte-derived oxidised mitochondrial DNA in the inflammatory interferon type 1 signature in juvenile dermatomyositis
Source: PubMed Central journal article supplement (PMC10176342; doi:10.1136/ard-2022-223469), 2022-12-23
Supplement: ard-2022-223469supp003.pdf [file ard-2022-223469supp003.pdf]

**Supplementary Table 2 - JDM on-treatment vs age-matched healthy control significantly DEG (p≤0.05)**

| Ensemble ID     | hgnc_symbol | log fold change | Adjusted p value |
|-----------------|-------------|-----------------|------------------|
| ENSG00000180096 |             | -2.052255975    | 2.09E-19         |
| ENSG00000198821 | CD247       | -3.6853539      | 1.16E-18         |
| ENSG00000167286 | CD3D        | -3.551669908    | 1.66E-16         |
| ENSG00000172575 | RASGRP1     | -3.070795975    | 3.11E-15         |
| ENSG00000211751 | TRBC1       | -3.419045734    | 2.20E-12         |
| ENSG00000198286 | CARD11      | -2.796358277    | 5.84E-12         |
| ENSG00000167984 | NLRC3       | -2.222497714    | 5.84E-12         |
| ENSG00000146674 | IGFBP3      | -7.778707429    | 2.51E-11         |
| ENSG00000211772 | TRBC2       | -2.989690802    | 2.61E-11         |
| ENSG00000116824 | CD2         | -2.03086348     | 4.60E-11         |
| ENSG00000160185 | UBASH3A     | -3.418915682    | 1.15E-10         |
| ENSG00000135127 | BICDL1      | -2.590545427    | 1.25E-10         |
| ENSG00000141293 | SKAP1       | -3.21275476     | 1.41E-10         |
| ENSG00000107742 | SPOCK2      | -2.784990372    | 1.97E-10         |
| ENSG00000211829 | TRDC        | -4.848737373    | 2.72E-10         |
| ENSG00000100385 | IL2RB       | -4.05203449     | 3.01E-10         |
| ENSG00000088387 | DOCK9       | -2.478453034    | 4.58E-10         |
| ENSG00000107485 | GATA3       | -3.652286077    | 4.99E-10         |
| ENSG00000111796 | KLRB1       | -4.239620129    | 4.99E-10         |
| ENSG00000198851 | CD3E        | -3.527372282    | 1.25E-09         |
| ENSG00000277734 | TRAC        | -3.315118258    | 1.58E-09         |
| ENSG00000115085 | ZAP70       | -2.976472679    | 1.67E-09         |
| ENSG00000245164 | LINC00861   | -3.746240843    | 1.67E-09         |
| ENSG00000134954 | ETS1        | -1.916657616    | 2.44E-09         |
| ENSG00000172005 | MAL         | -3.406085971    | 2.85E-09         |
| ENSG00000159753 | CARMIL2     | -1.985304372    | 4.46E-09         |
| ENSG00000139193 | CD27        | -3.232615925    | 4.63E-09         |
| ENSG00000280135 |             | -3.4001965      | 6.13E-09         |
| ENSG00000185101 | ANO9        | -2.653857897    | 6.33E-09         |
| ENSG00000227507 | LTB         | -1.880852284    | 2.48E-08         |
| ENSG00000142173 | COL6A2      | -3.544316837    | 2.79E-08         |
| ENSG00000145649 | GZMA        | -4.803964357    | 3.00E-08         |
| ENSG00000165929 | TC2N        | -3.376202958    | 5.06E-08         |
| ENSG00000067840 | PDZD4       | -3.586877431    | 5.94E-08         |
| ENSG00000182866 | LCK         | -2.590769579    | 7.96E-08         |
| ENSG00000100453 | GZMB        | -4.723558647    | 8.69E-08         |
| ENSG00000152495 | CAMK4       | -2.462194431    | 8.92E-08         |
| ENSG00000174917 | C19orf70    | -0.986150564    | 1.05E-07         |
| ENSG00000101096 | NFATC2      | -1.775717851    | 1.24E-07         |
| ENSG00000215788 | TNFRSF25    | -1.983277632    | 1.24E-07         |
| ENSG00000100346 | CACNA1I     | -3.960522984    | 1.34E-07         |
| ENSG00000110448 | CD5         | -2.699677477    | 1.67E-07         |
| ENSG00000180644 | PRF1        | -3.978196809    | 1.67E-07         |
| ENSG00000160856 | FCRL3       | -3.505239678    | 1.90E-07         |

|                 |           |              |          |
|-----------------|-----------|--------------|----------|
| ENSG00000112514 | CUTA      | -0.741980867 | 2.48E-07 |
| ENSG00000274383 |           | -1.929741987 | 2.48E-07 |
| ENSG00000197635 | DPP4      | -3.321883831 | 4.53E-07 |
| ENSG00000237702 | TRBV3-1   | -5.008641945 | 4.55E-07 |
| ENSG00000181847 | TIGIT     | -4.389997803 | 4.99E-07 |
| ENSG00000172428 | COPS9     | -0.788434886 | 5.05E-07 |
| ENSG00000102245 | CD40LG    | -4.62875827  | 7.18E-07 |
| ENSG00000175265 | GOLGA8A   | -1.927842692 | 7.18E-07 |
| ENSG00000069667 | RORA      | -2.806765832 | 7.95E-07 |
| ENSG00000130787 | HIP1R     | -2.317642191 | 9.45E-07 |
| ENSG00000149527 | PLCH2     | -3.00759078  | 9.82E-07 |
| ENSG00000127152 | BCL11B    | -3.159044333 | 9.85E-07 |
| ENSG00000163600 | ICOS      | -3.065807292 | 1.89E-06 |
| ENSG00000008517 | IL32      | -2.825328248 | 1.89E-06 |
| ENSG00000013725 | CD6       | -2.598998759 | 1.89E-06 |
| ENSG00000113263 | ITK       | -2.142174449 | 1.94E-06 |
| ENSG00000089012 | SIRPG     | -2.841535191 | 1.95E-06 |
| ENSG00000233355 | CHRM3-AS2 | -2.892835397 | 2.20E-06 |
| ENSG00000157778 | PSMG3     | -0.925377317 | 2.32E-06 |
| ENSG00000162894 | FCMR      | -2.313777415 | 2.39E-06 |
| ENSG00000065675 | PRKCQ     | -2.086724153 | 2.49E-06 |
| ENSG00000242485 | MRPL20    | -0.672956033 | 2.76E-06 |
| ENSG00000163519 | TRAT1     | -2.572266006 | 2.93E-06 |
| ENSG00000138795 | LEF1      | -2.744313922 | 3.13E-06 |
| ENSG00000021300 | PLEKHB1   | -2.755212735 | 3.52E-06 |
| ENSG00000172590 | MRPL52    | -1.039478499 | 3.75E-06 |
| ENSG00000204922 | UQCC3     | -1.252279855 | 3.79E-06 |
| ENSG00000168685 | IL7R      | -3.06562649  | 4.07E-06 |
| ENSG00000115607 | IL18RAP   | -3.868129846 | 4.20E-06 |
| ENSG00000163359 | COL6A3    | -3.042481553 | 5.16E-06 |
| ENSG00000123545 | NDUF4F4   | -1.230931388 | 5.34E-06 |
| ENSG00000188186 | LAMTOR4   | -0.896653885 | 5.75E-06 |
| ENSG00000111371 | SLC38A1   | -1.333852375 | 6.23E-06 |
| ENSG00000211747 | TRBV20-1  | -4.29557068  | 6.29E-06 |
| ENSG00000147123 | NDUFB11   | -0.782339867 | 7.83E-06 |
| ENSG00000108821 | COL1A1    | -5.839627398 | 1.19E-05 |
| ENSG00000130332 | LSM7      | -0.840516981 | 1.19E-05 |
| ENSG00000168813 | ZNF507    | -1.397131392 | 1.46E-05 |
| ENSG00000027869 | SH2D2A    | -2.822038779 | 1.60E-05 |
| ENSG00000099204 | ABLIM1    | -2.152294171 | 1.64E-05 |
| ENSG00000073861 | TBX21     | -3.297294039 | 1.64E-05 |
| ENSG00000100351 | GRAP2     | -2.003475841 | 1.78E-05 |
| ENSG00000197540 | GZMM      | -2.01951176  | 1.84E-05 |
| ENSG00000183648 | NDUFB1    | -0.807264541 | 2.03E-05 |
| ENSG00000184260 | HIST2H2AC | -1.373431101 | 2.65E-05 |
| ENSG00000090266 | NDUFB2    | -0.824472141 | 2.75E-05 |
| ENSG00000135426 | TESPA1    | -1.629451726 | 3.04E-05 |
| ENSG00000116106 | EPHA4     | -3.313173692 | 3.48E-05 |

|                 |             |              |             |
|-----------------|-------------|--------------|-------------|
| ENSG00000167515 | TRAPPC2L    | -0.735897306 | 3.59E-05    |
| ENSG00000145494 | NDUFS6      | -1.015043482 | 3.67E-05    |
| ENSG00000269911 |             | -4.606404955 | 3.99E-05    |
| ENSG00000162910 | MRPL55      | -0.83495544  | 4.65E-05    |
| ENSG00000198780 | FAM169A     | -3.221200275 | 4.91E-05    |
| ENSG00000100393 | EP300       | 0.906548266  | 4.97E-05    |
| ENSG00000149932 | TMEM219     | -0.585507926 | 5.00E-05    |
| ENSG00000106624 | AEBP1       | -2.687495998 | 5.28E-05    |
| ENSG00000280120 |             | -1.334309218 | 5.39E-05    |
| ENSG00000183918 | SH2D1A      | -3.218760784 | 5.93E-05    |
| ENSG00000099624 | ATP5D       | -0.885647999 | 6.05E-05    |
| ENSG00000185697 | MYBL1       | -2.184309898 | 6.07E-05    |
| ENSG00000135972 | MRPS9       | -0.835375097 | 6.25E-05    |
| ENSG00000237943 | PRKCQ-AS1   | -1.934661782 | 6.37E-05    |
| ENSG00000188322 | SBK1        | -2.122566913 | 6.37E-05    |
| ENSG00000081059 | TCF7        | -2.481024953 | 6.65E-05    |
| ENSG00000106211 | HSPB1       | -1.187404627 | 6.97E-05    |
| ENSG00000124203 | ZNF831      | -2.320006272 | 6.97E-05    |
| ENSG00000172673 | THEMIS      | -2.063839691 | 7.28E-05    |
| ENSG00000130635 | COL5A1      | -3.973796372 | 7.31E-05    |
| ENSG00000007520 | TSR3        | -0.855987865 | 7.80E-05    |
| ENSG00000174500 | GCSAM       | -4.046367946 | 7.97E-05    |
| ENSG00000105369 | CD79A       | -2.076747185 | 8.79E-05    |
| ENSG00000211655 | IGLV1-36    | -4.72487216  | 9.00E-05    |
| ENSG00000137078 | SIT1        | -3.347098458 | 9.59E-05    |
| ENSG00000131116 | ZNF428      | -0.760473447 | 9.82E-05    |
| ENSG00000124181 | PLCG1       | -1.526371087 | 9.97E-05    |
| ENSG00000214253 | FIS1        | -0.645207704 | 0.000104149 |
| ENSG00000105379 | ETFB        | -0.859182741 | 0.000106419 |
| ENSG00000076554 | TPD52       | -1.97094825  | 0.000121484 |
| ENSG00000156110 | ADK         | -1.196227224 | 0.00012391  |
| ENSG00000137288 | UQCC2       | -1.251893378 | 0.000125616 |
| ENSG00000107223 | EDF1        | -0.632596227 | 0.000131092 |
| ENSG00000110717 | NDUFS8      | -0.678684054 | 0.000140299 |
| ENSG00000157570 | TSPAN18     | -3.716968277 | 0.000140877 |
| ENSG00000146285 | SCML4       | -2.029414028 | 0.000144535 |
| ENSG00000269293 | ZSCAN16-AS1 | -0.887401584 | 0.000145942 |
| ENSG00000175854 | SWI5        | -0.98164604  | 0.000150055 |
| ENSG00000211648 | IGLV1-47    | -4.162451755 | 0.000151866 |
| ENSG00000154764 | WNT7A       | -4.452672944 | 0.000157734 |
| ENSG00000135736 | CCDC102A    | -3.706893682 | 0.000177087 |
| ENSG00000270189 |             | -1.50166595  | 0.000185057 |
| ENSG00000186265 | BTLA        | -2.860145709 | 0.000191827 |
| ENSG00000173208 | ABCD2       | -2.674134864 | 0.000203269 |
| ENSG00000124198 | ARFGEF2     | 0.762532979  | 0.000206119 |
| ENSG00000108961 | RANGRF      | -0.715893364 | 0.000220644 |
| ENSG00000132704 | FCRL2       | -2.358634214 | 0.0002207   |
| ENSG00000102030 | NAA10       | -0.808561228 | 0.0002207   |

|                 |           |              |             |
|-----------------|-----------|--------------|-------------|
| ENSG00000103266 | STUB1     | -0.614031322 | 0.00022242  |
| ENSG00000149541 | B3GAT3    | -0.715026991 | 0.000231571 |
| ENSG00000189171 | S100A13   | -1.276796156 | 0.000232557 |
| ENSG00000182004 | SNRPE     | -0.702748144 | 0.000241368 |
| ENSG00000105851 | PIK3CG    | 1.072334784  | 0.000256536 |
| ENSG00000124172 | ATP5E     | -0.530371079 | 0.000256883 |
| ENSG00000100075 | SLC25A1   | -0.814500073 | 0.000269424 |
| ENSG00000142168 | SOD1      | -0.569101957 | 0.000277946 |
| ENSG00000220205 | VAMP2     | -0.674680527 | 0.000278827 |
| ENSG00000112182 | BACH2     | -1.875630295 | 0.000283723 |
| ENSG00000268205 |           | -0.897853759 | 0.000283723 |
| ENSG00000241837 | ATP5O     | -0.627082799 | 0.000287438 |
| ENSG00000112651 | MRPL2     | -0.754335639 | 0.000291318 |
| ENSG00000278030 | TRBV7-9   | -4.257279795 | 0.000302609 |
| ENSG00000143322 | ABL2      | 0.930760122  | 0.00030897  |
| ENSG00000170486 | KRT72     | -3.312303799 | 0.000310573 |
| ENSG00000170291 | ELP5      | -0.585991686 | 0.000310573 |
| ENSG00000127184 | COX7C     | -0.548030399 | 0.00031646  |
| ENSG00000106355 | LSM5      | -0.69826303  | 0.000323502 |
| ENSG00000137441 | FGFBP2    | -3.96553518  | 0.000341439 |
| ENSG00000235162 | C12orf75  | -2.376290004 | 0.000341439 |
| ENSG00000178982 | EIF3K     | -0.556702503 | 0.000346212 |
| ENSG00000213626 | LBH       | -1.73764558  | 0.00035002  |
| ENSG00000169397 | RNASE3    | -2.905581045 | 0.000353281 |
| ENSG00000109390 | NDUFC1    | -0.778152395 | 0.000357875 |
| ENSG00000280237 | MIR4697HG | -3.6930875   | 0.000370798 |
| ENSG00000165272 | AQP3      | -2.503749656 | 0.000388947 |
| ENSG00000272034 | SNORD14A  | -1.246736407 | 0.000396447 |
| ENSG00000161405 | IKZF3     | -1.248053926 | 0.000396447 |
| ENSG00000130313 | PGLS      | -0.676717342 | 0.000409576 |
| ENSG00000204392 | LSM2      | -1.002115829 | 0.000416218 |
| ENSG00000143793 | C1orf35   | -0.872094409 | 0.000420175 |
| ENSG00000106400 | ZNHIT1    | -0.695513813 | 0.000424608 |
| ENSG00000176476 | SGF29     | -0.685619041 | 0.000424608 |
| ENSG00000170906 | NDUFA3    | -0.663695681 | 0.000426697 |
| ENSG00000153283 | CD96      | -2.727977245 | 0.000428379 |
| ENSG00000123066 | MED13L    | 0.969391831  | 0.000429434 |
| ENSG00000254521 | SIGLEC12  | -3.383033923 | 0.000459732 |
| ENSG00000243449 | C4orf48   | -1.427472708 | 0.000475129 |
| ENSG00000167792 | NDUFV1    | -0.572069152 | 0.000498831 |
| ENSG00000130748 | TMEM160   | -1.336986115 | 0.000500391 |
| ENSG00000100450 | GZMH      | -4.033767324 | 0.00050574  |
| ENSG00000135940 | COX5B     | -0.631352572 | 0.000505886 |
| ENSG00000100372 | SLC25A17  | -0.872895189 | 0.000505886 |
| ENSG00000228903 | RASA4CP   | -1.021244905 | 0.000523693 |
| ENSG00000115523 | GNLY      | -3.381977425 | 0.00053024  |
| ENSG00000145912 | NHP2      | -0.73974099  | 0.000533554 |
| ENSG00000178922 | HYI       | -1.471570573 | 0.000585641 |

|                 |           |              |             |
|-----------------|-----------|--------------|-------------|
| ENSG00000196456 | ZNF775    | -1.261727966 | 0.000600014 |
| ENSG00000166136 | NDUFB8    | -0.630795623 | 0.000601971 |
| ENSG00000173915 | USMG5     | -0.713718359 | 0.000602892 |
| ENSG00000255198 | SNHG9     | -0.998551623 | 0.000612206 |
| ENSG00000235621 | LINC00494 | -4.271244394 | 0.000612206 |
| ENSG00000130731 | METTL26   | -0.900618751 | 0.00061549  |
| ENSG00000125901 | MRPS26    | -0.941146865 | 0.000620267 |
| ENSG00000130770 | ATPIF1    | -0.685815934 | 0.000630569 |
| ENSG00000113088 | GZMK      | -3.38635086  | 0.000630569 |
| ENSG00000211789 | TRAV12-2  | -3.568982501 | 0.000630569 |
| ENSG00000135919 | SERPINE2  | -2.691219945 | 0.000660959 |
| ENSG00000124782 | RREB1     | 0.647120023  | 0.000660959 |
| ENSG00000156411 | C14orf2   | -0.597727634 | 0.000660959 |
| ENSG00000128185 | DGCR6L    | -0.863877878 | 0.000660959 |
| ENSG00000050165 | DKK3      | -4.787872624 | 0.000663704 |
| ENSG00000224877 | NDUFAF8   | -1.104881901 | 0.000701391 |
| ENSG00000105258 | POLR2I    | -0.891264653 | 0.000707797 |
| ENSG00000169976 | SF3B5     | -0.580444487 | 0.000721086 |
| ENSG00000109686 | SH3D19    | -3.202135976 | 0.00072893  |
| ENSG00000196498 | NCOR2     | 0.790243881  | 0.000776069 |
| ENSG00000173141 | MRPL57    | -0.769830645 | 0.000776121 |
| ENSG00000034053 | APBA2     | -1.941769966 | 0.000803438 |
| ENSG00000115685 | PPP1R7    | -0.618937955 | 0.000871845 |
| ENSG00000136573 | BLK       | -2.535242251 | 0.000875463 |
| ENSG00000174080 | CTSF      | -1.358855208 | 0.00092528  |
| ENSG00000100027 | YPEL1     | -1.531721793 | 0.000929974 |
| ENSG00000161381 | PLXDC1    | -1.758478027 | 0.000940066 |
| ENSG00000129559 | NEDD8     | -0.618396927 | 0.000944673 |
| ENSG00000204228 | HSD17B8   | -1.326715677 | 0.000949783 |
| ENSG00000153207 | AHCTF1    | 1.46492768   | 0.000964021 |
| ENSG00000101082 | SLA2      | -1.510618291 | 0.000979842 |
| ENSG00000120733 | KDM3B     | 0.617003549  | 0.000986782 |
| ENSG00000148362 | C9orf142  | -0.805896401 | 0.000986782 |
| ENSG00000168646 | AXIN2     | -3.805669646 | 0.00101752  |
| ENSG00000008083 | JARID2    | 1.484396023  | 0.001018111 |
| ENSG00000198258 | UBL5      | -0.518241849 | 0.001019919 |
| ENSG00000158552 | ZFAND2B   | -0.530277112 | 0.001025477 |
| ENSG00000140332 | TLE3      | 1.13848898   | 0.001059245 |
| ENSG00000232442 |           | -1.292940585 | 0.001062457 |
| ENSG00000178980 | SELENOW   | -0.592817766 | 0.001066345 |
| ENSG00000188243 | COMMD6    | -0.529169941 | 0.001085746 |
| ENSG00000163430 | FSTL1     | -3.126233143 | 0.001086546 |
| ENSG00000205138 | SDHAF1    | -1.096661584 | 0.001088015 |
| ENSG00000168002 | POLR2G    | -0.532471779 | 0.001096663 |
| ENSG00000210151 | MT-TS1    | -2.200485555 | 0.00110886  |
| ENSG00000170430 | MGMT      | -1.03459222  | 0.001126459 |
| ENSG00000276136 |           | -1.500710793 | 0.001137814 |
| ENSG00000143515 | ATP8B2    | -1.300025565 | 0.001159268 |

|                 |          |              |             |
|-----------------|----------|--------------|-------------|
| ENSG00000067900 | ROCK1    | 0.740341417  | 0.001159268 |
| ENSG00000082458 | DLG3     | -2.943436749 | 0.001179363 |
| ENSG00000087191 | PSMC5    | -0.552768277 | 0.001179363 |
| ENSG00000173436 | MINOS1   | -0.646132624 | 0.001198012 |
| ENSG00000106089 | STX1A    | 4.590319195  | 0.001202837 |
| ENSG00000259865 |          | -0.875600656 | 0.001235819 |
| ENSG00000099977 | DDT      | -0.821115861 | 0.001235819 |
| ENSG00000250251 | PKD1P6   | 1.093497086  | 0.001241575 |
| ENSG00000178498 | DTX3     | -1.539877493 | 0.00125692  |
| ENSG00000055609 | KMT2C    | 0.798575161  | 0.00129472  |
| ENSG00000136908 | DPM2     | -0.80553397  | 0.00129472  |
| ENSG00000232869 | TRBV29-1 | -2.85196455  | 0.001310797 |
| ENSG00000107872 | FBXL15   | -0.924591084 | 0.001321719 |
| ENSG00000163534 | FCRL1    | -2.423717463 | 0.001386628 |
| ENSG00000142546 | NOSIP    | -0.941657275 | 0.001420714 |
| ENSG00000164692 | COL1A2   | -4.352695936 | 0.001435805 |
| ENSG00000211896 | IGHG1    | -3.283908874 | 0.001435805 |
| ENSG00000211797 | TRAV17   | -4.051771056 | 0.00146041  |
| ENSG00000174946 | GPR171   | -3.131352456 | 0.001476075 |
| ENSG00000106399 | RPA3     | -0.813822282 | 0.001476075 |
| ENSG00000174886 | NDUFA11  | -0.941108386 | 0.001531853 |
| ENSG00000148290 | SURF1    | -0.558868668 | 0.00153948  |
| ENSG00000121671 | CRY2     | 1.223840349  | 0.001581574 |
| ENSG00000134809 | TIMM10   | -0.936517161 | 0.001586879 |
| ENSG00000196655 | TRAPPC4  | -0.753344316 | 0.001586879 |
| ENSG00000085231 | AK6      | -0.933091766 | 0.001587935 |
| ENSG00000065526 | SPEN     | 0.708670026  | 0.00162693  |
| ENSG00000124151 | NCOA3    | 0.657226203  | 0.001668737 |
| ENSG00000196705 | ZNF431   | -0.693030839 | 0.001692454 |
| ENSG00000105518 | TMEM205  | -0.736130692 | 0.001743982 |
| ENSG00000130856 | ZNF236   | 0.65320043   | 0.001744548 |
| ENSG00000090273 | NUDC     | -0.61733871  | 0.001745767 |
| ENSG00000140990 | NDUFB10  | -0.738105046 | 0.001755565 |
| ENSG00000229809 | ZNF688   | -0.692887812 | 0.001793471 |
| ENSG00000134545 | KLRC1    | -4.079430013 | 0.00179426  |
| ENSG00000211750 | TRBV24-1 | -4.04677386  | 0.001844893 |
| ENSG00000072364 | AFF4     | 0.882034479  | 0.001890326 |
| ENSG00000148291 | SURF2    | -0.711917554 | 0.001890326 |
| ENSG00000187630 | DHRS4L2  | -0.951131089 | 0.001890326 |
| ENSG00000164919 | COX6C    | -0.594725036 | 0.001996994 |
| ENSG00000206828 |          | -1.402511589 | 0.002073839 |
| ENSG00000211899 | IGHM     | -2.516390861 | 0.00210415  |
| ENSG00000132326 | PER2     | 1.617704987  | 0.00211366  |
| ENSG00000070961 | ATP2B1   | 1.97538625   | 0.00211366  |
| ENSG00000272579 |          | -1.23634543  | 0.00214336  |
| ENSG00000091972 | CD200    | -3.208271292 | 0.002217994 |
| ENSG00000180992 | MRPL14   | -0.792139988 | 0.002217994 |
| ENSG00000167799 | NUDT8    | -1.689812174 | 0.002217994 |

|                 |            |              |             |
|-----------------|------------|--------------|-------------|
| ENSG00000258199 |            | -0.756805886 | 0.002217994 |
| ENSG00000259959 |            | -1.177368418 | 0.002219683 |
| ENSG00000247774 | PCED1B-AS1 | -0.935354286 | 0.002219683 |
| ENSG00000211898 | IGHD       | -2.516143722 | 0.002219683 |
| ENSG00000095906 | NUBP2      | -0.704321541 | 0.002219683 |
| ENSG00000105404 | RABAC1     | -0.71092015  | 0.002219683 |
| ENSG00000238142 |            | -1.232822857 | 0.002230551 |
| ENSG00000213139 | CRYGS      | -1.076148013 | 0.002230551 |
| ENSG00000211677 | IGLC2      | -3.176288711 | 0.002230551 |
| ENSG00000164442 | CITED2     | 1.009950175  | 0.002238492 |
| ENSG00000151131 | C12orf45   | -0.74306226  | 0.002238492 |
| ENSG00000164008 | C1orf50    | -0.804396737 | 0.002246465 |
| ENSG00000211592 | IGKC       | -2.783545648 | 0.002246465 |
| ENSG00000135960 | EDAR       | -2.855390559 | 0.002246465 |
| ENSG00000066379 | ZNRD1      | -0.806445845 | 0.002246465 |
| ENSG00000273466 |            | -1.09284548  | 0.002253779 |
| ENSG00000111674 | ENO2       | -1.749155517 | 0.002326211 |
| ENSG00000169155 | ZBTB43     | 1.527093901  | 0.002378582 |
| ENSG00000156873 | PHKG2      | -0.532089104 | 0.002385462 |
| ENSG00000125743 | SNRPD2     | -0.489067056 | 0.002385462 |
| ENSG00000235499 |            | 1.888817223  | 0.002385723 |
| ENSG00000160654 | CD3G       | -1.342797889 | 0.002385723 |
| ENSG00000180089 | TMEM86B    | -0.911842024 | 0.002385723 |
| ENSG00000180530 | NRIP1      | 1.215876229  | 0.002385723 |
| ENSG00000107833 | NPM3       | -0.969928202 | 0.002409829 |
| ENSG00000241351 | IGKV3-11   | -3.615749194 | 0.002422507 |
| ENSG00000160124 | CCDC58     | -0.92968934  | 0.002471394 |
| ENSG00000128951 | DUT        | -0.889271259 | 0.002508397 |
| ENSG00000185920 | PTCH1      | -2.127072769 | 0.002536447 |
| ENSG00000215845 | TSTD1      | -0.975940459 | 0.002573252 |
| ENSG00000204580 | DDR1       | -1.354183492 | 0.002573252 |
| ENSG00000156650 | KAT6B      | 0.721919037  | 0.002573252 |
| ENSG00000143297 | FCRL5      | -1.841088613 | 0.002590936 |
| ENSG00000101224 | CDC25B     | -0.683124858 | 0.002644042 |
| ENSG00000205352 | PRR13      | -0.499615457 | 0.002659719 |
| ENSG00000168061 | SAC3D1     | -1.605755115 | 0.0026856   |
| ENSG00000213904 | LIPE-AS1   | -1.074855614 | 0.0026856   |
| ENSG00000186501 | TMEM222    | -0.571760714 | 0.00270021  |
| ENSG00000175602 | CCDC85B    | -0.840267144 | 0.00270021  |
| ENSG00000141759 | TXNL4A     | -0.511850743 | 0.00270021  |
| ENSG00000220201 | ZGLP1      | -1.232843285 | 0.00270021  |
| ENSG00000227191 | TRGC2      | -2.280472747 | 0.002701707 |
| ENSG00000237886 | NALT1      | -1.317446891 | 0.002707822 |
| ENSG00000166912 | MTMR10     | 0.619269305  | 0.002728082 |
| ENSG00000099797 | TECR       | -0.749774487 | 0.002803735 |
| ENSG00000002822 | MAD1L1     | -0.941831532 | 0.002863033 |
| ENSG00000113319 | RASGRF2    | -1.911608929 | 0.002871806 |
| ENSG00000113712 | CSNK1A1    | 0.631575602  | 0.002886691 |

|                 |          |              |             |
|-----------------|----------|--------------|-------------|
| ENSG00000175193 | PARL     | -0.46027997  | 0.00290763  |
| ENSG00000078596 | ITM2A    | -1.678050878 | 0.00290763  |
| ENSG00000235245 |          | 1.18866358   | 0.002909427 |
| ENSG00000071655 | MBD3     | -0.630403085 | 0.002979797 |
| ENSG00000124201 | ZNFX1    | 0.892768364  | 0.003031446 |
| ENSG00000125650 | PSPN     | -1.058034777 | 0.003031446 |
| ENSG00000173113 | TRMT112  | -0.572052472 | 0.003059826 |
| ENSG00000115317 | HTRA2    | -0.68723354  | 0.003090521 |
| ENSG00000118900 | UBN1     | 0.503806277  | 0.003092371 |
| ENSG00000143543 | JTB      | -0.474491257 | 0.003142449 |
| ENSG00000164405 | UQCRQ    | -0.61097571  | 0.003180774 |
| ENSG00000064490 | RFXANK   | -0.551589636 | 0.003258643 |
| ENSG00000163794 | UCN      | -1.312929891 | 0.003284201 |
| ENSG00000071859 | FAM50A   | -0.476889204 | 0.003284201 |
| ENSG00000186049 | KRT73    | -3.206404934 | 0.00331186  |
| ENSG00000091409 | ITGA6    | -1.636973357 | 0.003317157 |
| ENSG00000117419 | ERI3     | -0.513444099 | 0.003318012 |
| ENSG00000262814 | MRPL12   | -1.209334265 | 0.003350118 |
| ENSG00000042753 | AP2S1    | -0.746866157 | 0.003350118 |
| ENSG00000166405 | RIC3     | -1.752528741 | 0.003431247 |
| ENSG00000211788 | TRAV13-1 | -3.553683346 | 0.003431247 |
| ENSG00000174547 | MRPL11   | -0.595259725 | 0.003436893 |
| ENSG00000211795 | TRAV8-6  | -3.805808293 | 0.003436893 |
| ENSG00000214026 | MRPL23   | -0.789860978 | 0.003468972 |
| ENSG00000126756 | UXT      | -0.523879046 | 0.003552209 |
| ENSG00000188690 | UROS     | -0.552418701 | 0.003552209 |
| ENSG00000280649 |          | -1.069214829 | 0.003555564 |
| ENSG00000142197 | DOPEY2   | 0.716765403  | 0.003584705 |
| ENSG00000156030 | ELMSAN1  | 0.844193989  | 0.003618581 |
| ENSG00000279865 |          | -0.962117861 | 0.003623064 |
| ENSG00000272800 |          | -2.492216361 | 0.003623358 |
| ENSG00000103254 | FAM173A  | -1.145538369 | 0.003651756 |
| ENSG00000167258 | CDK12    | 0.527733912  | 0.003651756 |
| ENSG00000156639 | ZFAND3   | 0.559111948  | 0.003698614 |
| ENSG00000156738 | MS4A1    | -2.391621523 | 0.003698614 |
| ENSG00000005339 | CREBBP   | 0.63934494   | 0.003698614 |
| ENSG00000271109 |          | -2.376468688 | 0.003711817 |
| ENSG00000106133 | NSUN5P2  | -1.307507949 | 0.003742354 |
| ENSG00000099795 | NDUFB7   | -0.71305014  | 0.003746865 |
| ENSG00000009413 | REV3L    | 0.676640564  | 0.003780849 |
| ENSG00000110711 | AIP      | -0.588127852 | 0.003811454 |
| ENSG00000172586 | CHCHD1   | -0.959143303 | 0.003828244 |
| ENSG00000143727 | ACP1     | -0.457656693 | 0.003831007 |
| ENSG00000056050 | HPF1     | -1.194549826 | 0.003831007 |
| ENSG00000257727 | CNPY2    | -0.602750121 | 0.003831007 |
| ENSG00000184076 | UQCR10   | -0.694618584 | 0.003831007 |
| ENSG00000210154 | MT-TD    | -1.64971623  | 0.003851474 |
| ENSG00000074071 | MRPS34   | -0.879326358 | 0.003859763 |



|                 |           |              |             |
|-----------------|-----------|--------------|-------------|
| ENSG00000115604 | IL18R1    | -2.291033659 | 0.003862624 |
| ENSG00000109452 | INPP4B    | -1.778829582 | 0.003862624 |
| ENSG00000234389 |           | -3.587673289 | 0.003887425 |
| ENSG00000171443 | ZNF524    | -0.7577136   | 0.003894411 |
| ENSG00000029639 | TFB1M     | -1.05552499  | 0.003955229 |
| ENSG00000168229 | PTGDR     | -3.346215593 | 0.004155694 |
| ENSG00000265206 | MIR142    | -1.341339875 | 0.004208594 |
| ENSG00000166557 | TMED3     | -0.586738861 | 0.004209418 |
| ENSG00000196998 | WDR45     | -0.436944407 | 0.004247827 |
| ENSG00000090238 | YPEL3     | -0.733561139 | 0.004298452 |
| ENSG00000156983 | BRPF1     | 0.635801863  | 0.004313453 |
| ENSG00000111344 | RASAL1    | 6.217511069  | 0.004375212 |
| ENSG00000172500 | FIBP      | -0.638607312 | 0.004547109 |
| ENSG00000205981 | DNAJC19   | -0.784600758 | 0.004598665 |
| ENSG00000110497 | AMBRA1    | 0.542060184  | 0.004598665 |
| ENSG00000151500 | THYN1     | -0.919232373 | 0.004598665 |
| ENSG00000182173 | TSEN54    | -0.866716776 | 0.004598665 |
| ENSG00000133657 | ATP13A3   | 1.464715552  | 0.004616096 |
| ENSG00000198931 | APRT      | -0.623803831 | 0.004616096 |
| ENSG00000175756 | AURKAIP1  | -0.569076116 | 0.004632373 |
| ENSG00000131495 | NDUFA2    | -0.654725751 | 0.004653323 |
| ENSG00000139537 | CCDC65    | -3.255032493 | 0.004672159 |
| ENSG00000176903 | PNMA1     | 1.067291673  | 0.004679466 |
| ENSG00000125877 | ITPA      | -0.659170325 | 0.004679466 |
| ENSG00000117322 | CR2       | -2.058452531 | 0.004697359 |
| ENSG00000168090 | COPS6     | -0.520882211 | 0.004697359 |
| ENSG00000169020 | ATP5I     | -0.581944407 | 0.004744626 |
| ENSG00000163376 | KBTBD8    | 1.69629381   | 0.004746086 |
| ENSG00000070047 | PHRF1     | 0.612452552  | 0.00478137  |
| ENSG00000104872 | PIH1D1    | -0.576006924 | 0.004872391 |
| ENSG00000213977 | TAX1BP3   | -0.896311437 | 0.004889339 |
| ENSG00000186010 | NDUFA13   | -0.688117962 | 0.004922006 |
| ENSG00000069956 | MAPK6     | 1.602058488  | 0.004974083 |
| ENSG00000172922 | RNASEH2C  | -0.87678512  | 0.004976652 |
| ENSG00000167578 | RAB4B     | -0.735835132 | 0.004976652 |
| ENSG00000131591 | C1orf159  | -0.64080934  | 0.005041661 |
| ENSG00000198932 | GPRASP1   | -1.350685503 | 0.005041661 |
| ENSG00000134899 | ERCC5     | -0.588623353 | 0.005041661 |
| ENSG00000099385 | BCL7C     | -0.569823388 | 0.005041661 |
| ENSG00000197457 | STMN3     | -1.053407853 | 0.005041661 |
| ENSG00000114023 | FAM162A   | -0.691068522 | 0.005252977 |
| ENSG00000178449 | COX14     | -0.690788727 | 0.005252977 |
| ENSG00000130590 | SAMD10    | -1.307193    | 0.005261554 |
| ENSG00000034713 | GABARAPL2 | -0.561366346 | 0.005265767 |
| ENSG00000144214 | LYG1      | -1.120042901 | 0.00529096  |
| ENSG00000104490 | NCALD     | -2.023883943 | 0.005293655 |
| ENSG00000084112 | SSH1      | 0.753636123  | 0.005359294 |
| ENSG00000260228 |           | -1.433661047 | 0.005382074 |

|                 |           |              |             |
|-----------------|-----------|--------------|-------------|
| ENSG00000125445 | MRPS7     | -0.559504093 | 0.005382074 |
| ENSG00000163788 | SNRK      | 0.718576358  | 0.005393953 |
| ENSG00000104517 | UBR5      | 0.492054034  | 0.005395523 |
| ENSG00000070785 | EIF2B3    | -0.88466032  | 0.00542296  |
| ENSG00000186854 | TRABD2A   | -1.331249571 | 0.005429133 |
| ENSG00000179526 | SHARPIN   | -0.548163304 | 0.005473194 |
| ENSG00000118640 | VAMP8     | -0.685860856 | 0.005483552 |
| ENSG00000245910 | SNHG6     | -0.551261653 | 0.005483552 |
| ENSG00000100647 | SUSD6     | 0.565222141  | 0.005483552 |
| ENSG00000250318 |           | -1.206752337 | 0.005522994 |
| ENSG00000125611 | CHCHD5    | -0.725028072 | 0.005523755 |
| ENSG00000255026 |           | -2.264980191 | 0.005523755 |
| ENSG00000100575 | TIMM9     | -0.60669243  | 0.005523755 |
| ENSG00000235374 | SSR4P1    | -1.330021487 | 0.005523755 |
| ENSG00000140992 | PDPK1     | 0.520647984  | 0.005657625 |
| ENSG00000106268 | NUDT1     | -0.815513472 | 0.005690673 |
| ENSG00000150456 | EEF1AKMT1 | -1.281259874 | 0.005690673 |
| ENSG00000137145 | DENND4C   | 0.676878109  | 0.005760933 |
| ENSG00000138821 | SLC39A8   | 2.9969628    | 0.005789507 |
| ENSG00000225864 | HCG4P11   | -2.075218108 | 0.005789507 |
| ENSG00000102471 | NDFIP2    | -2.908439267 | 0.005789507 |
| ENSG00000103024 | NME3      | -0.957076304 | 0.005789507 |
| ENSG00000188599 | NPIPP1    | -1.032795375 | 0.005789507 |
| ENSG00000167863 | ATP5H     | -0.547746035 | 0.005789507 |
| ENSG00000164483 | SAMD3     | -2.057449628 | 0.005810141 |
| ENSG00000211689 | TRGC1     | -2.531900415 | 0.005814115 |
| ENSG00000159958 | TNFRSF13C | -1.780009242 | 0.005852956 |
| ENSG00000262049 |           | -0.75359782  | 0.005874615 |
| ENSG00000169884 | WNT10B    | -1.73390122  | 0.005889351 |
| ENSG00000196683 | TOMM7     | -0.644165299 | 0.005916319 |
| ENSG00000154122 | ANKH      | 1.370777137  | 0.005924707 |
| ENSG00000183826 | BTBD9     | 0.815322268  | 0.005958191 |
| ENSG00000008294 | SPAG9     | 0.794114758  | 0.006039216 |
| ENSG00000213654 | GPSM3     | -0.430822002 | 0.006218697 |
| ENSG00000144645 | OSBPL10   | -1.758380303 | 0.006218903 |
| ENSG00000125458 | NT5C      | -0.743265943 | 0.006225642 |
| ENSG00000185761 | ADAMTSL5  | -2.661834133 | 0.006259272 |
| ENSG00000273361 |           | -1.100278211 | 0.006447564 |
| ENSG00000171159 | C9orf16   | -0.627737641 | 0.006461552 |
| ENSG00000107672 | NSMCE4A   | -0.599851448 | 0.006466577 |
| ENSG00000122140 | MRPS2     | -0.636939704 | 0.006480008 |
| ENSG00000250317 | SMIM20    | -0.729397288 | 0.006492425 |
| ENSG00000180185 | FAHD1     | -0.968801184 | 0.006517199 |
| ENSG00000002330 | BAD       | -0.581869768 | 0.006544074 |
| ENSG00000243147 | MRPL33    | -0.536515258 | 0.006545909 |
| ENSG00000213465 | ARL2      | -0.981755571 | 0.006588779 |
| ENSG00000161677 | JOSD2     | -0.920446461 | 0.006604838 |
| ENSG00000179361 | ARID3B    | 0.927101168  | 0.006613523 |

|                 |           |              |             |
|-----------------|-----------|--------------|-------------|
| ENSG00000006015 | C19orf60  | -0.780166117 | 0.006613523 |
| ENSG00000174137 | FAM53A    | -1.375105073 | 0.006625594 |
| ENSG00000124802 | EEF1E1    | -0.955883398 | 0.006667583 |
| ENSG00000174109 | C16orf91  | -0.741345419 | 0.006716842 |
| ENSG00000007312 | CD79B     | -1.347501038 | 0.0068066   |
| ENSG00000141698 | NT5C3B    | -1.002899219 | 0.006808457 |
| ENSG00000179715 | PCED1B    | -1.320473421 | 0.006820642 |
| ENSG00000089057 | SLC23A2   | 0.760865366  | 0.006831429 |
| ENSG00000183506 | PI4KAP2   | 0.893927285  | 0.006852984 |
| ENSG00000114388 | NPRL2     | -0.623300389 | 0.006871054 |
| ENSG00000176386 | CDC26     | -0.60545355  | 0.006871054 |
| ENSG00000256576 |           | -1.17913261  | 0.006929097 |
| ENSG00000169660 | HEXDC     | -1.092809856 | 0.00695082  |
| ENSG00000038219 | BOD1L1    | 0.705169705  | 0.00697272  |
| ENSG00000211746 | TRBV19    | -3.353187647 | 0.00697272  |
| ENSG00000126353 | CCR7      | -1.751876737 | 0.00697272  |
| ENSG00000163382 | NAXE      | -0.62706082  | 0.006983897 |
| ENSG00000278942 |           | -3.335752477 | 0.006983897 |
| ENSG00000160318 | CLDND2    | -1.99093826  | 0.007042153 |
| ENSG00000126088 | UROD      | -0.559917552 | 0.00704863  |
| ENSG00000274752 | TRBV12-3  | -3.352646309 | 0.007049759 |
| ENSG00000246898 | LINC00920 | -1.70753076  | 0.007090887 |
| ENSG00000275055 |           | -1.326554878 | 0.007090887 |
| ENSG00000079337 | RAPGEF3   | -2.291477983 | 0.007138    |
| ENSG00000167283 | ATP5L     | -0.39914685  | 0.007189213 |
| ENSG00000121851 | POLR3GL   | -0.68194242  | 0.007224777 |
| ENSG00000196313 | POM121    | 0.456303883  | 0.007226902 |
| ENSG00000211734 | TRBV5-1   | -3.083916417 | 0.007226902 |
| ENSG00000011590 | ZBTB32    | -3.803327816 | 0.0072278   |
| ENSG00000165006 | UBAP1     | 1.016658482  | 0.00739764  |
| ENSG00000122482 | ZNF644    | 0.738126182  | 0.007402587 |
| ENSG00000156603 | MED19     | -0.882511586 | 0.007402587 |
| ENSG00000169288 | MRPL1     | -0.755986704 | 0.007405513 |
| ENSG00000109111 | SUPT6H    | 0.700370583  | 0.007405513 |
| ENSG00000126768 | TIMM17B   | -0.480768    | 0.007419159 |
| ENSG00000052749 | RRP12     | 0.998350248  | 0.007481409 |
| ENSG00000054523 | KIF1B     | 0.850753922  | 0.007499987 |
| ENSG00000117298 | ECE1      | 0.684569348  | 0.007499987 |
| ENSG00000167548 | KMT2D     | 0.73715763   | 0.007499987 |
| ENSG00000123374 | CDK2      | -0.702921321 | 0.007499987 |
| ENSG00000179085 | DPM3      | -0.733500172 | 0.007541218 |
| ENSG00000118689 | FOXO3     | 1.100354544  | 0.007541218 |
| ENSG00000118523 | CTGF      | -3.998429189 | 0.007541218 |
| ENSG00000148308 | GTF3C5    | -0.396713262 | 0.007541218 |
| ENSG00000244242 | IFITM10   | 3.156558887  | 0.007541218 |
| ENSG00000185475 | TMEM179B  | -0.528857069 | 0.007541218 |
| ENSG00000069493 | CLEC2D    | -0.90173644  | 0.007541218 |
| ENSG00000159884 | CCDC107   | -0.696373822 | 0.007634489 |

|                 |           |              |             |
|-----------------|-----------|--------------|-------------|
| ENSG00000171222 | SCAND1    | -0.669945727 | 0.007694843 |
| ENSG00000158373 | HIST1H2BD | -1.387658487 | 0.007774524 |
| ENSG00000085998 | POMGNT1   | -0.647726487 | 0.007945138 |
| ENSG00000127720 | METTTL25  | -0.741156437 | 0.00798012  |
| ENSG00000123144 | C19orf43  | -0.503997248 | 0.008019324 |
| ENSG00000151012 | SLC7A11   | 4.902298063  | 0.008051755 |
| ENSG00000197057 | DTHD1     | -3.805928592 | 0.008116641 |
| ENSG00000102908 | NFAT5     | 0.981381277  | 0.008116641 |
| ENSG00000256053 | APOPT1    | -0.658065501 | 0.008183364 |
| ENSG00000071994 | PDCD2     | -0.60987101  | 0.008244768 |
| ENSG00000065057 | NTHL1     | -1.184372773 | 0.008314765 |
| ENSG00000184897 | H1FX      | -0.775405838 | 0.008331622 |
| ENSG00000092010 | PSME1     | -0.511324215 | 0.008331622 |
| ENSG00000262919 | FAM58A    | -0.627878435 | 0.008362198 |
| ENSG00000159055 | MIS18A    | -1.043089659 | 0.008366143 |
| ENSG00000204475 | NCR3      | -2.116045347 | 0.00838112  |
| ENSG00000163882 | POLR2H    | -0.909984956 | 0.00841218  |
| ENSG00000103522 | IL21R     | -1.203079914 | 0.008440305 |
| ENSG00000130779 | CLIP1     | 0.546550403  | 0.008508457 |
| ENSG00000112695 | COX7A2    | -0.495596793 | 0.008522097 |
| ENSG00000160271 | RALGDS    | 1.141697686  | 0.008577309 |
| ENSG00000211679 | IGLC3     | -2.968040453 | 0.008577309 |
| ENSG00000104823 | ECH1      | -0.718591918 | 0.008625612 |
| ENSG00000181222 | POLR2A    | 0.692733328  | 0.008689805 |
| ENSG00000229980 | TOB1-AS1  | -1.256182501 | 0.008689805 |
| ENSG00000154102 | C16orf74  | -1.149512594 | 0.008694687 |
| ENSG00000130595 | TNNT3     | 2.348720037  | 0.00872194  |
| ENSG00000260404 |           | 1.022837811  | 0.008740797 |
| ENSG00000182154 | MRPL41    | -0.848860402 | 0.008740797 |
| ENSG00000119640 | ACYP1     | -1.116742955 | 0.008740797 |
| ENSG00000198171 | DDRGK1    | -0.49552446  | 0.008740797 |
| ENSG00000171988 | JMJD1C    | 1.010236425  | 0.008917932 |
| ENSG00000205643 | CDPF1     | -1.128518232 | 0.008956775 |
| ENSG00000153406 | NMRAL1    | -0.595889722 | 0.008987048 |
| ENSG00000126456 | IRF3      | -0.714217599 | 0.008998585 |
| ENSG00000186660 | ZFP91     | 0.597590983  | 0.009006979 |
| ENSG00000204237 | OXL1      | -1.025946823 | 0.009073642 |
| ENSG00000110713 | NUP98     | 0.882132592  | 0.009158382 |
| ENSG00000164053 | ATRIP     | -0.728953802 | 0.009224283 |
| ENSG00000078487 | ZCWPW1    | -0.845208243 | 0.009224283 |
| ENSG00000123154 | WDR83     | -0.614399137 | 0.009242716 |
| ENSG00000100429 | HDAC10    | -0.731867229 | 0.009335951 |
| ENSG00000100836 | PABPN1    | -0.428739719 | 0.009491196 |
| ENSG00000092841 | MYL6      | -0.504395967 | 0.009498655 |
| ENSG00000173281 | PPP1R3B   | 1.243839275  | 0.009543041 |
| ENSG00000096070 | BRPF3     | 0.707036581  | 0.009596317 |
| ENSG00000101391 | CDK5RAP1  | -0.420646444 | 0.009629149 |
| ENSG00000103145 | HCFC1R1   | -0.688743261 | 0.009640343 |

|                 |           |              |             |
|-----------------|-----------|--------------|-------------|
| ENSG00000151694 | ADAM17    | 0.569148211  | 0.009906186 |
| ENSG00000004478 | FKBP4     | -0.89182819  | 0.009912238 |
| ENSG00000267858 | MZF1-AS1  | -1.054222285 | 0.009939332 |
| ENSG00000074755 | ZZEF1     | 0.513853931  | 0.009965996 |
| ENSG00000235576 |           | -3.361892329 | 0.009986244 |
| ENSG00000197180 |           | -0.988773749 | 0.009986244 |
| ENSG00000254815 |           | -2.504189188 | 0.009986244 |
| ENSG00000163832 | ELP6      | -0.764820394 | 0.010119668 |
| ENSG00000167106 | FAM102A   | -0.873366138 | 0.010119668 |
| ENSG00000129158 | SERGEF    | -0.764695252 | 0.010119668 |
| ENSG00000185947 | ZNF267    | 1.292854277  | 0.010119668 |
| ENSG00000169738 | DCXR      | -0.782485701 | 0.010119668 |
| ENSG00000007080 | CCDC124   | -0.542143805 | 0.010119668 |
| ENSG00000218283 | MORF4L1P1 | 0.715295624  | 0.010127251 |
| ENSG00000211787 | TRAV8-3   | -3.515642452 | 0.010127251 |
| ENSG00000211803 | TRAV23DV6 | -3.081398705 | 0.010127251 |
| ENSG00000270550 | IGHV3-30  | -3.542578363 | 0.010127251 |
| ENSG00000131873 | CHSY1     | 1.018118022  | 0.010127251 |
| ENSG00000211796 | TRAV16    | -3.512417221 | 0.010149637 |
| ENSG00000139428 | MMAB      | -0.661591617 | 0.010151954 |
| ENSG00000092148 | HECTD1    | 0.466240494  | 0.010151954 |
| ENSG00000007255 | TRAPPC6A  | -0.76496011  | 0.010151954 |
| ENSG00000105552 | BCAT2     | -0.74845306  | 0.010177324 |
| ENSG00000132185 | FCRLA     | -2.305145584 | 0.010194588 |
| ENSG00000008018 | PSMB1     | -0.416022639 | 0.010304931 |
| ENSG00000211793 | TRAV9-2   | -3.517548871 | 0.010432614 |
| ENSG00000198900 | TOP1      | 0.836552447  | 0.010465627 |
| ENSG00000160218 | TRAPPC10  | 0.637481657  | 0.010513856 |
| ENSG00000100258 | LMF2      | -0.443550151 | 0.010547929 |
| ENSG00000160075 | SSU72     | -0.348001585 | 0.010582203 |
| ENSG00000167664 | TMIGD2    | -2.086310356 | 0.010582203 |
| ENSG00000100426 | ZBED4     | 0.497435326  | 0.010582203 |
| ENSG00000157933 | SKI       | 0.935934355  | 0.010665116 |
| ENSG00000148396 | SEC16A    | 0.643827032  | 0.010665116 |
| ENSG00000141506 | PIK3R5    | 0.828460647  | 0.010665116 |
| ENSG00000228623 | ZNF883    | -1.996685019 | 0.010667322 |
| ENSG00000244187 | TMEM141   | -0.829574021 | 0.010714819 |
| ENSG00000211776 | TRAV2     | -3.513699695 | 0.010789534 |
| ENSG00000278784 |           | -0.768907227 | 0.01102224  |
| ENSG00000169592 | INO80E    | -0.76604936  | 0.01105392  |
| ENSG00000128218 | VPREB3    | -2.928684917 | 0.011115322 |
| ENSG00000271869 |           | -1.023913028 | 0.011145692 |
| ENSG00000232788 |           | -1.504401745 | 0.011197599 |
| ENSG00000184281 | TSSC4     | -0.488502198 | 0.011209778 |
| ENSG00000134709 | HOOK1     | -2.47967242  | 0.011225555 |
| ENSG00000119431 | HDHD3     | -0.979936133 | 0.011238674 |
| ENSG00000149474 | KAT14     | -0.716682945 | 0.011242405 |
| ENSG00000181036 | FCRL6     | -3.124764485 | 0.011258843 |

|                 |           |              |             |
|-----------------|-----------|--------------|-------------|
| ENSG00000164151 | ICE1      | 0.511579922  | 0.011258843 |
| ENSG00000211724 | TRBV6-6   | -3.503652548 | 0.011258843 |
| ENSG00000089195 | TRMT6     | 0.956671269  | 0.011258843 |
| ENSG00000184702 | Sep-05    | 5.290109037  | 0.011258843 |
| ENSG00000136942 | RPL35     | -0.54378298  | 0.011451824 |
| ENSG00000236778 | INTS6-AS1 | -0.795329139 | 0.011456401 |
| ENSG00000211965 | IGHV3-49  | -3.335291477 | 0.011456401 |
| ENSG00000140365 | COMMD4    | -0.7034297   | 0.011456401 |
| ENSG00000104907 | TRMT1     | -0.553588205 | 0.011456401 |
| ENSG00000152082 | MZT2B     | -0.623376319 | 0.011548949 |
| ENSG00000169583 | CLIC3     | -2.689926713 | 0.011548949 |
| ENSG00000176101 | SSNA1     | -0.577695533 | 0.011548949 |
| ENSG00000149016 | TUT1      | -0.788231419 | 0.011596103 |
| ENSG00000242660 |           | -1.169198951 | 0.011596103 |
| ENSG00000130159 | ECSIT     | -0.505207333 | 0.011596103 |
| ENSG00000151135 | TMEM263   | -0.876701318 | 0.011648517 |
| ENSG00000268861 |           | 2.61984339   | 0.011661629 |
| ENSG00000182196 | ARL6IP4   | -1.001977368 | 0.011665313 |
| ENSG00000169641 | LUZP1     | 0.625289533  | 0.01167294  |
| ENSG00000205544 | TMEM256   | -0.792489914 | 0.01167294  |
| ENSG00000163508 | EOMES     | -3.275261219 | 0.011694319 |
| ENSG00000054148 | PHPT1     | -0.776620283 | 0.01177888  |
| ENSG00000186480 | INSIG1    | 1.315479277  | 0.011783712 |
| ENSG00000116251 | RPL22     | -0.463786509 | 0.011845418 |
| ENSG00000128739 | SNRPN     | -0.707532418 | 0.011878046 |
| ENSG00000116353 | MECR      | -0.807489511 | 0.011878208 |
| ENSG00000149357 | LAMTOR1   | -0.434026736 | 0.011917173 |
| ENSG00000100150 | DEPDC5    | 0.52941313   | 0.011942502 |
| ENSG00000232119 | MCTS1     | -0.742378736 | 0.01198379  |
| ENSG00000187193 | MT1X      | -1.121972998 | 0.01198379  |
| ENSG00000130755 | GMFG      | -0.501314106 | 0.012087163 |
| ENSG00000263264 |           | 1.060693793  | 0.01213979  |
| ENSG00000171425 | ZNF581    | -0.632109021 | 0.012171032 |
| ENSG00000230797 | YY2       | -1.246828083 | 0.01221308  |
| ENSG00000139697 | SBNO1     | 0.418215004  | 0.01221308  |
| ENSG00000250479 | CHCHD10   | -0.720388657 | 0.01221308  |
| ENSG00000163156 | SCNM1     | -0.455904748 | 0.012274706 |
| ENSG00000115760 | BIRC6     | 0.574664816  | 0.012274706 |
| ENSG00000144034 | TPRKB     | -0.555336328 | 0.012333286 |
| ENSG00000238035 |           | 1.143984139  | 0.012333286 |
| ENSG00000085662 | AKR1B1    | -0.608501557 | 0.012333286 |
| ENSG00000211897 | IGHG3     | -3.059172484 | 0.012418681 |
| ENSG00000141873 | SLC39A3   | -0.676751369 | 0.01242397  |
| ENSG00000232112 | TMA7      | -0.425568338 | 0.01255484  |
| ENSG00000234585 | CCT6P3    | -0.661809283 | 0.01255484  |
| ENSG00000127540 | UQCR11    | -0.535392033 | 0.012592905 |
| ENSG00000084093 | REST      | 0.542868348  | 0.012616576 |
| ENSG00000136929 | HEMGN     | -3.521369393 | 0.012616576 |

|                 |           |              |             |
|-----------------|-----------|--------------|-------------|
| ENSG00000119650 | IFT43     | -0.679602136 | 0.012616576 |
| ENSG00000128908 | INO80     | 0.417690386  | 0.012616576 |
| ENSG00000105364 | MRPL4     | -0.518232258 | 0.012616576 |
| ENSG00000164091 | WDR82     | 0.501613749  | 0.01275049  |
| ENSG00000240509 | RPL34P18  | -1.100601614 | 0.01275049  |
| ENSG00000226121 |           | 1.420788405  | 0.012753751 |
| ENSG00000100348 | TXN2      | -0.519550688 | 0.012754773 |
| ENSG00000088356 | PDRG1     | -0.692255991 | 0.012794362 |
| ENSG00000063180 | CA11      | -0.913260126 | 0.012794362 |
| ENSG00000204348 | DXO       | -0.704852622 | 0.012863791 |
| ENSG00000239569 | KMT2E-AS1 | -0.780131937 | 0.012866918 |
| ENSG00000183542 | KLRC4     | -3.514610921 | 0.012866918 |
| ENSG00000113194 | FAF2      | 0.508316541  | 0.012888579 |
| ENSG00000055118 | KCNH2     | -3.506980657 | 0.012888579 |
| ENSG00000228434 |           | -0.926355879 | 0.01289901  |
| ENSG00000162227 | TAF6L     | -0.634185948 | 0.012905998 |
| ENSG00000079462 | PAFAH1B3  | -0.735947342 | 0.012905998 |
| ENSG00000143353 | LYPLAL1   | -0.78320972  | 0.012963649 |
| ENSG00000164897 | TMUB1     | -0.510471368 | 0.012994771 |
| ENSG00000160446 | ZDHHC12   | -0.543488114 | 0.013011998 |
| ENSG00000142303 | ADAMTS10  | -0.99278428  | 0.013011998 |
| ENSG00000258352 |           | -2.31256717  | 0.013380413 |
| ENSG00000211669 | IGLV3-10  | -3.776343772 | 0.013380413 |
| ENSG00000230074 |           | -0.975183916 | 0.013450949 |
| ENSG00000189227 | C15orf61  | -0.703454096 | 0.013483123 |
| ENSG00000119705 | SLIRP     | -0.612477138 | 0.013497508 |
| ENSG00000181754 | AMIGO1    | -1.557921234 | 0.013821976 |
| ENSG00000205531 | NAP1L4    | -0.475105962 | 0.013911691 |
| ENSG00000225200 |           | -0.851500695 | 0.014016709 |
| ENSG00000143575 | HAX1      | -0.501677597 | 0.01401709  |
| ENSG00000175463 | TBC1D10C  | -0.598721484 | 0.01401709  |
| ENSG00000253701 |           | -3.479250159 | 0.01401709  |
| ENSG00000104885 | DOT1L     | 0.98944776   | 0.01401709  |
| ENSG00000105185 | PDCD5     | -0.627200691 | 0.01401709  |
| ENSG00000268516 |           | -1.195863546 | 0.01401709  |
| ENSG00000115548 | KDM3A     | 0.857988301  | 0.014046053 |
| ENSG00000132432 | SEC61G    | -0.630003682 | 0.014065801 |
| ENSG00000259820 |           | 1.33531448   | 0.014065801 |
| ENSG00000254402 | LRRC24    | -1.095698885 | 0.014065801 |
| ENSG00000182957 | SPATA13   | 0.708399388  | 0.014065801 |
| ENSG00000265401 |           | -2.260507505 | 0.014065801 |
| ENSG00000105677 | TMEM147   | -0.551182542 | 0.014065801 |
| ENSG00000135930 | EIF4E2    | -0.369012552 | 0.014080576 |
| ENSG00000151881 | TMEM267   | -0.693398605 | 0.014147513 |
| ENSG00000186184 | POLR1D    | -0.412131316 | 0.014221566 |
| ENSG00000089163 | SIRT4     | -2.057745926 | 0.014309859 |
| ENSG00000164406 | LEAP2     | -1.205092658 | 0.014399458 |
| ENSG00000155640 | NA        | 1.146410748  | 0.01449837  |

|                 |           |              |             |
|-----------------|-----------|--------------|-------------|
| ENSG00000137764 | MAP2K5    | -0.501140706 | 0.014583377 |
| ENSG00000204220 | PFDN6     | -0.783255514 | 0.014588639 |
| ENSG00000131242 | RAB11FIP4 | 0.656101092  | 0.014613544 |
| ENSG00000108826 | MRPL27    | -0.80556646  | 0.014695844 |
| ENSG00000183978 | COA3      | -0.974422621 | 0.014733691 |
| ENSG00000138698 | RAP1GDS1  | -0.516958978 | 0.014770098 |
| ENSG00000251259 |           | -0.75282835  | 0.014797644 |
| ENSG00000273338 |           | -1.216803237 | 0.014867394 |
| ENSG00000156467 | UQCRB     | -0.484809458 | 0.014871945 |
| ENSG00000279605 |           | -1.620703984 | 0.014871945 |
| ENSG00000133065 | SLC41A1   | -0.638509472 | 0.014947076 |
| ENSG00000181038 | METTL23   | -0.465127571 | 0.014947076 |
| ENSG00000175575 | PAAF1     | -0.698798243 | 0.015137728 |
| ENSG00000169964 | TMEM42    | -0.837805388 | 0.015166065 |
| ENSG00000126012 | KDM5C     | 0.459150422  | 0.015171416 |
| ENSG00000267121 |           | -0.888009605 | 0.015244267 |
| ENSG00000149743 | TRPT1     | -0.671511952 | 0.015251061 |
| ENSG00000087589 | CASS4     | 1.291610171  | 0.015308293 |
| ENSG00000272092 |           | -1.212907017 | 0.015329451 |
| ENSG00000272398 | CD24      | -2.290591013 | 0.0153805   |
| ENSG00000163975 | MELTF     | 2.767519441  | 0.015386305 |
| ENSG00000113161 | HMGCR     | 0.589442305  | 0.015439855 |
| ENSG00000127554 | GFER      | -0.50603521  | 0.015439855 |
| ENSG00000115274 | INO80B    | -0.791604845 | 0.015450086 |
| ENSG00000166199 | ALKBH3    | -0.580863458 | 0.015540239 |
| ENSG00000141040 | ZNF287    | -1.32951221  | 0.015554176 |
| ENSG00000168028 | RPSA      | -0.489559504 | 0.015563532 |
| ENSG00000211710 | TRBV4-1   | -3.063068168 | 0.015563532 |
| ENSG00000181924 | COA4      | -0.638982455 | 0.01569311  |
| ENSG00000280234 |           | 1.507619243  | 0.01569311  |
| ENSG00000143314 | MRPL24    | -0.83250627  | 0.015760222 |
| ENSG00000168672 | FAM84B    | -1.379975765 | 0.015760222 |
| ENSG00000108510 | MED13     | 0.546937903  | 0.015839186 |
| ENSG00000178209 | PLEC      | 0.733447941  | 0.015867444 |
| ENSG00000107020 | PLGRKT    | -0.670750168 | 0.015919642 |
| ENSG00000083720 | OXCT1     | -0.737619309 | 0.015928244 |
| ENSG00000127125 | PPCS      | -0.514972908 | 0.016172749 |
| ENSG00000116586 | LAMTOR2   | -0.797776193 | 0.016180097 |
| ENSG00000089902 | RCOR1     | 0.456121086  | 0.016234438 |
| ENSG00000137094 | DNAJB5    | 1.598453551  | 0.016268665 |
| ENSG00000169189 | NSMCE1    | -0.740969212 | 0.016295056 |
| ENSG00000187837 | HIST1H1C  | -1.033703419 | 0.016298479 |
| ENSG00000010278 | CD9       | 2.722071032  | 0.016312303 |
| ENSG00000124486 | USP9X     | 0.639318343  | 0.016378231 |
| ENSG00000076944 | STXBP2    | -0.466986659 | 0.016440125 |
| ENSG00000080573 | COL5A3    | -3.286877814 | 0.016492319 |
| ENSG00000158417 | EIF5B     | -0.561929254 | 0.016548667 |
| ENSG00000272936 |           | -1.204234034 | 0.016548667 |



|                 |           |              |             |
|-----------------|-----------|--------------|-------------|
| ENSG00000162461 | SLC25A34  | 1.441304093  | 0.016719869 |
| ENSG00000008324 | SS18L2    | -0.557987557 | 0.016719869 |
| ENSG00000174238 | PITPNA    | 0.662681943  | 0.016719869 |
| ENSG00000167491 | GATAD2A   | 0.454136142  | 0.016719869 |
| ENSG00000147576 | ADHFE1    | -0.944342615 | 0.016725311 |
| ENSG00000182208 | MOB2      | -0.483077133 | 0.016725877 |
| ENSG00000260400 |           | -1.851112734 | 0.016725877 |
| ENSG00000177455 | CD19      | -1.56320814  | 0.016725877 |
| ENSG00000176022 | B3GALT6   | -0.817116125 | 0.016749951 |
| ENSG00000166428 | PLD4      | -1.624997893 | 0.016749951 |
| ENSG00000163820 | FYCO1     | 0.602913102  | 0.016838712 |
| ENSG00000084207 | GSTP1     | -0.719923973 | 0.016838712 |
| ENSG00000081692 | JMJD4     | -0.710916057 | 0.016859408 |
| ENSG00000202198 |           | -1.53550549  | 0.017038046 |
| ENSG00000151690 | MFSD6     | 0.663052075  | 0.017083799 |
| ENSG00000162384 | C1orf123  | -0.583146387 | 0.017090057 |
| ENSG00000267751 |           | -1.126347789 | 0.017090057 |
| ENSG00000163520 | FBLN2     | -1.798052601 | 0.017108446 |
| ENSG00000167113 | COQ4      | -0.639611138 | 0.017197666 |
| ENSG00000167930 | FAM234A   | -0.527185565 | 0.017197666 |
| ENSG00000127445 | PIN1      | -0.432245487 | 0.017199534 |
| ENSG00000214140 | PRCD      | -3.565630981 | 0.017206811 |
| ENSG00000188933 | USP32P1   | 2.68321166   | 0.017217238 |
| ENSG00000211450 | SELENOH   | -0.656786736 | 0.017281296 |
| ENSG00000167543 | TP53I13   | -0.668919347 | 0.017281296 |
| ENSG00000005448 | WDR54     | -0.799870239 | 0.017356757 |
| ENSG00000101126 | ADNP      | 0.467245568  | 0.017356757 |
| ENSG00000130255 | RPL36     | -0.590408855 | 0.017356757 |
| ENSG00000167522 | ANKRD11   | 0.42398405   | 0.017462204 |
| ENSG00000081052 | COL4A4    | -3.311201244 | 0.017606123 |
| ENSG00000211949 | IGHV3-23  | -2.685467977 | 0.017606123 |
| ENSG00000156795 | WDYHV1    | -0.712728747 | 0.01774331  |
| ENSG00000226777 | FAM30A    | -2.206740334 | 0.01774331  |
| ENSG00000172543 | CTSW      | -1.576645984 | 0.017766059 |
| ENSG00000134070 | IRAK2     | 3.229985846  | 0.017776281 |
| ENSG00000139343 | SNRPF     | -0.486220851 | 0.017776281 |
| ENSG00000167685 | ZNF444    | -0.608755174 | 0.017776281 |
| ENSG00000140511 | HAPLN3    | -1.313810827 | 0.017930992 |
| ENSG00000260807 |           | -2.312167126 | 0.017930992 |
| ENSG00000101473 | ACOT8     | -0.5547786   | 0.017939198 |
| ENSG00000198695 | MT-ND6    | -0.804090324 | 0.017939198 |
| ENSG00000144591 | GMPPA     | -0.626791367 | 0.017964909 |
| ENSG00000211651 | IGLV1-44  | -2.70687554  | 0.017996276 |
| ENSG00000099381 | SETD1A    | 0.584340349  | 0.018003584 |
| ENSG00000166289 | PLEKHF1   | -1.778150216 | 0.018069848 |
| ENSG00000197386 | HTT       | 0.552496367  | 0.0181707   |
| ENSG00000212694 | LINC01089 | -0.87676789  | 0.0181707   |
| ENSG00000228205 |           | -0.966419529 | 0.018234874 |

|                 |            |              |             |
|-----------------|------------|--------------|-------------|
| ENSG00000229659 | RPL26P6    | -0.778032572 | 0.018234874 |
| ENSG00000105393 | BABAM1     | -0.488138017 | 0.018234874 |
| ENSG00000231584 | FAHD2CP    | -1.291835289 | 0.01823871  |
| ENSG00000254709 | IPLL5      | -2.733281699 | 0.018239823 |
| ENSG00000173575 | CHD2       | 0.697761212  | 0.018277794 |
| ENSG00000138629 | UBL7       | -0.552734623 | 0.018375108 |
| ENSG00000114956 | DGUOK      | -0.403319234 | 0.018399221 |
| ENSG00000141378 | PTRH2      | -0.685700234 | 0.018399221 |
| ENSG00000170604 | IRF2BP1    | -0.732467824 | 0.018490551 |
| ENSG00000135999 | EPC2       | 0.537027555  | 0.018496839 |
| ENSG00000241468 | ATP5J2     | -0.583158339 | 0.0185079   |
| ENSG00000128626 | MRPS12     | -0.734994349 | 0.0185079   |
| ENSG00000187608 | ISG15      | -1.46119361  | 0.018532403 |
| ENSG00000237190 | CDKN2AIPNL | -0.509589406 | 0.01855445  |
| ENSG00000083814 | ZNF671     | -0.853461458 | 0.018564748 |
| ENSG00000197705 | KLHL14     | -2.750140245 | 0.018631271 |
| ENSG00000189046 | ALKBH2     | -0.733517608 | 0.018739732 |
| ENSG00000109475 | RPL34      | -0.523209863 | 0.018782154 |
| ENSG00000134278 | SPIRE1     | 1.74525424   | 0.018782154 |
| ENSG00000119682 | AREL1      | 0.461581929  | 0.01879741  |
| ENSG00000211785 | TRAV12-1   | -3.101811298 | 0.018882497 |
| ENSG00000269044 |            | -0.738577114 | 0.018882497 |
| ENSG00000214176 | PLEKHM1P1  | 0.561640744  | 0.018926246 |
| ENSG00000143222 | UFC1       | -0.36644964  | 0.018926496 |
| ENSG00000226660 | TRBV2      | -2.870183762 | 0.018926496 |
| ENSG00000182985 | CADM1      | 4.984035986  | 0.018926496 |
| ENSG00000272333 | KMT2B      | 0.445024101  | 0.018926496 |
| ENSG00000185608 | MRPL40     | -0.613151071 | 0.018926496 |
| ENSG00000115464 | USP34      | 0.425242877  | 0.01897551  |
| ENSG00000267074 |            | -2.544539019 | 0.01897551  |
| ENSG00000105855 | ITGB8      | 3.226866868  | 0.019044746 |
| ENSG00000168036 | CTNNB1     | 0.699145409  | 0.019070822 |
| ENSG00000164182 | NDUFAF2    | -0.671904715 | 0.019070822 |
| ENSG00000088833 | NSFL1C     | -0.513270334 | 0.019070822 |
| ENSG00000215375 | MYL5       | -0.902588712 | 0.019100198 |
| ENSG00000063438 | AHRR       | 4.138876321  | 0.01912396  |
| ENSG00000110871 | COQ5       | -0.740620258 | 0.01919413  |
| ENSG00000205155 | PSENN      | -0.540505486 | 0.01919413  |
| ENSG00000123472 | ATPAF1     | -0.600531509 | 0.019213778 |
| ENSG00000172939 | OXSRI      | 0.928779097  | 0.019213778 |
| ENSG00000078589 | P2RY10     | -1.516465551 | 0.019213778 |
| ENSG00000110011 | DNAJC4     | -0.430690776 | 0.019213778 |
| ENSG00000257698 |            | -1.122545736 | 0.019213778 |
| ENSG00000100442 | FKBP3      | -0.70410967  | 0.019213778 |
| ENSG00000179044 | EXOC3L1    | -1.564527187 | 0.019213778 |
| ENSG00000126267 | COX6B1     | -0.496403471 | 0.019213778 |
| ENSG00000269968 |            | -1.880810938 | 0.019223317 |
| ENSG00000166747 | AP1G1      | 0.764752289  | 0.019223317 |

|                 |           |              |             |
|-----------------|-----------|--------------|-------------|
| ENSG00000271601 | LIX1L     | -0.587030616 | 0.019245139 |
| ENSG00000169955 | ZNF747    | -0.58272777  | 0.019247213 |
| ENSG00000272156 |           | -2.24750863  | 0.019318046 |
| ENSG00000145675 | PIK3R1    | 1.141154294  | 0.019404171 |
| ENSG00000167088 | SNRPD1    | -0.590306922 | 0.019404171 |
| ENSG00000144741 | SLC25A26  | -0.508524868 | 0.019408097 |
| ENSG00000153006 | SREK1IP1  | -0.452129897 | 0.019408097 |
| ENSG00000230551 |           | 0.931141552  | 0.019408097 |
| ENSG00000072786 | STK10     | 0.431289025  | 0.019408097 |
| ENSG00000159199 | ATP5G1    | -0.583927881 | 0.019408097 |
| ENSG00000183751 | TBL3      | -0.442827112 | 0.019597081 |
| ENSG00000120699 | EXOSC8    | -0.523296597 | 0.019599898 |
| ENSG00000136158 | SPRY2     | 3.763750349  | 0.019640602 |
| ENSG00000184371 | CSF1      | 2.794324569  | 0.019641343 |
| ENSG00000014641 | MDH1      | -0.567221626 | 0.019641343 |
| ENSG00000186577 | C6orf1    | -0.497074092 | 0.019641343 |
| ENSG00000182774 | RPS17     | -0.467072548 | 0.019641343 |
| ENSG00000181555 | SETD2     | 0.456207411  | 0.019654511 |
| ENSG00000260912 |           | -1.257022729 | 0.019654511 |
| ENSG00000167526 | RPL13     | -0.558412207 | 0.019654511 |
| ENSG00000264608 |           | -0.851528187 | 0.019654511 |
| ENSG00000232388 | LINC00493 | -0.498133742 | 0.019654511 |
| ENSG00000176533 | GNG7      | -0.948468332 | 0.019654511 |
| ENSG00000079432 | CIC       | 0.526654341  | 0.019654511 |
| ENSG00000172071 | EIF2AK3   | 1.236870324  | 0.019677201 |
| ENSG00000162032 | SPSB3     | -0.452726034 | 0.019677201 |
| ENSG00000141294 | LRRC46    | -1.182141108 | 0.019677201 |
| ENSG00000152102 | FAM168B   | 0.453109026  | 0.019756778 |
| ENSG00000141933 | TPGS1     | -0.758279532 | 0.019756778 |
| ENSG00000144674 | GOLGA4    | 0.641678     | 0.019840151 |
| ENSG00000140526 | ABHD2     | 0.738472671  | 0.019840151 |
| ENSG00000111879 | FAM184A   | -2.878102781 | 0.019870515 |
| ENSG00000143947 | RPS27A    | -0.477264582 | 0.019974425 |
| ENSG00000175634 | RPS6KB2   | -0.39429141  | 0.019995216 |
| ENSG00000132436 | FIGNL1    | -1.187557042 | 0.020011769 |
| ENSG00000133256 | PDE6B     | -0.745521031 | 0.020048245 |
| ENSG00000186073 | C15orf41  | -1.060874064 | 0.020048245 |
| ENSG00000157540 | DYRK1A    | 0.394608175  | 0.020048245 |
| ENSG00000178015 | GPR150    | -2.899968292 | 0.020186734 |
| ENSG00000204356 | NELFE     | -0.378936214 | 0.020186734 |
| ENSG00000182180 | MRPS16    | -0.515018401 | 0.020218243 |
| ENSG00000011566 | MAP4K3    | 1.174054156  | 0.020336903 |
| ENSG00000183828 | NUDT14    | -0.776059832 | 0.020336903 |
| ENSG00000228444 |           | -1.852320423 | 0.020437818 |
| ENSG00000139289 | PHLDA1    | 3.023396358  | 0.020560825 |
| ENSG00000266302 |           | 3.306370388  | 0.020560825 |
| ENSG00000153201 | RANBP2    | 1.120313459  | 0.020578159 |
| ENSG00000237753 |           | -1.217946732 | 0.020578159 |

|                 |            |              |             |
|-----------------|------------|--------------|-------------|
| ENSG00000145354 | CISD2      | -0.680419254 | 0.020578159 |
| ENSG00000116688 | MFN2       | 0.451240508  | 0.020653781 |
| ENSG00000162191 | UBXN1      | -0.430653488 | 0.020653781 |
| ENSG00000267598 |            | -1.552476277 | 0.020653781 |
| ENSG00000204536 | CCHCR1     | -0.692154496 | 0.020659197 |
| ENSG00000058063 | ATP11B     | 0.5765797    | 0.020860331 |
| ENSG00000100416 | TRMU       | -0.503297854 | 0.020905118 |
| ENSG00000060140 | STYK1      | -3.481975038 | 0.021009306 |
| ENSG00000112078 | KCTD20     | 0.482488032  | 0.021072367 |
| ENSG00000147804 | SLC39A4    | -0.77013501  | 0.021137455 |
| ENSG00000227678 |            | -2.882857908 | 0.02114369  |
| ENSG00000064393 | HIPK2      | 1.005115978  | 0.021228159 |
| ENSG00000147687 | TATDN1     | -0.567515132 | 0.021248518 |
| ENSG00000115211 | EIF2B4     | -0.441372971 | 0.021272985 |
| ENSG00000136295 | TTYH3      | 0.855994704  | 0.021272985 |
| ENSG00000272155 |            | -1.373165187 | 0.021272985 |
| ENSG00000165905 | LARGE2     | -2.444323027 | 0.021272985 |
| ENSG00000183741 | CBX6       | 0.67828884   | 0.02127616  |
| ENSG00000272990 |            | -1.166285837 | 0.0214968   |
| ENSG00000163564 | PYHIN1     | -1.545648957 | 0.021593723 |
| ENSG00000124562 | SNRPC      | -0.491495509 | 0.021593723 |
| ENSG00000149150 | SLC43A1    | -0.919327556 | 0.021593723 |
| ENSG00000179639 | FCER1A     | -2.346231754 | 0.021600619 |
| ENSG00000223797 | ENTPD3-AS1 | -0.931001236 | 0.021600619 |
| ENSG00000251580 |            | -1.061409631 | 0.021600619 |
| ENSG00000111196 | MAGOHB     | -0.647828677 | 0.021600619 |
| ENSG00000169228 | RAB24      | -0.794945772 | 0.021640774 |
| ENSG00000174292 | TNK1       | -2.337306501 | 0.021696075 |
| ENSG00000164211 | STARD4     | 1.08989202   | 0.021754687 |
| ENSG00000152672 | CLEC4F     | -3.679629777 | 0.021793424 |
| ENSG00000258704 | SRP54-AS1  | -1.029317941 | 0.021793424 |
| ENSG00000262089 |            | -0.744351419 | 0.021851801 |
| ENSG00000178896 | EXOSC4     | -0.914135302 | 0.021867556 |
| ENSG00000175352 | NRIP3      | 3.048087477  | 0.021867556 |
| ENSG00000225190 | PLEKHM1    | 0.473557832  | 0.021867556 |
| ENSG00000248015 |            | -1.798970906 | 0.021867556 |
| ENSG00000104886 | PLEKHJ1    | -0.643088924 | 0.021867556 |
| ENSG00000169567 | HINT1      | -0.367376398 | 0.021974635 |
| ENSG00000166435 | XRRA1      | 1.937104971  | 0.022002878 |
| ENSG00000174276 | ZNHIT2     | -0.982702503 | 0.022014493 |
| ENSG00000148300 | REXO4      | -0.555414562 | 0.02201515  |
| ENSG00000137449 | CPEB2      | 0.864311924  | 0.022065141 |
| ENSG00000104529 | EEF1D      | -0.392033023 | 0.022065141 |
| ENSG00000103707 | MTFMT      | -0.867908231 | 0.022065141 |
| ENSG00000174915 | PTDSS2     | -0.434865214 | 0.022115256 |
| ENSG00000101464 | PIGU       | -0.780536522 | 0.022119203 |
| ENSG00000080603 | SRCAP      | 0.732573402  | 0.02217788  |
| ENSG00000127481 | UBR4       | 0.613054729  | 0.022203271 |

|                 |          |              |             |
|-----------------|----------|--------------|-------------|
| ENSG0000005075  | POLR2J   | -0.477421522 | 0.022203271 |
| ENSG00000125846 | ZNF133   | -0.827304101 | 0.022203271 |
| ENSG00000080189 | SLC35C2  | -0.364600267 | 0.022203271 |
| ENSG00000105617 | LENG1    | -0.722161335 | 0.022203271 |
| ENSG00000115350 | POLE4    | -0.524230201 | 0.022241406 |
| ENSG00000168386 | FILIP1L  | 1.962897175  | 0.022241406 |
| ENSG00000196367 | TRRAP    | 0.534933607  | 0.022268476 |
| ENSG00000257764 |          | -1.082228226 | 0.022345117 |
| ENSG00000260711 |          | -2.0245142   | 0.022345117 |
| ENSG00000161956 | SENP3    | -0.557711345 | 0.022345117 |
| ENSG00000180739 | S1PR5    | -2.739359395 | 0.022407855 |
| ENSG00000172943 | PHF8     | 0.36111685   | 0.022451374 |
| ENSG00000112306 | RPS12    | -0.502564872 | 0.022526066 |
| ENSG00000135018 | UBQLN1   | 0.363803742  | 0.022526066 |
| ENSG00000116918 | TSNAX    | -0.651962658 | 0.022543549 |
| ENSG00000242588 |          | 1.178892176  | 0.022598144 |
| ENSG00000279491 |          | -1.167603432 | 0.022653507 |
| ENSG00000170776 | AKAP13   | 0.514985147  | 0.022653507 |
| ENSG00000160113 | NR2F6    | -1.177526509 | 0.022653507 |
| ENSG00000138495 | COX17    | -0.619447435 | 0.022731675 |
| ENSG00000115594 | IL1R1    | 2.939034403  | 0.022845218 |
| ENSG00000104979 | C19orf53 | -0.423029129 | 0.0228483   |
| ENSG00000174165 | ZDHHC24  | -0.502229558 | 0.023105361 |
| ENSG00000198934 | MAGEE1   | -2.384939115 | 0.023117824 |
| ENSG00000174437 | ATP2A2   | 0.506316562  | 0.023120664 |
| ENSG00000171163 | ZNF692   | -0.921576367 | 0.023154541 |
| ENSG00000114902 | SPCS1    | -0.491996822 | 0.023157331 |
| ENSG00000249592 |          | -0.910765919 | 0.023157331 |
| ENSG00000166886 | NAB2     | 1.97677917   | 0.023286188 |
| ENSG00000050327 | ARHGEF5  | -2.373990214 | 0.023341233 |
| ENSG00000123908 | AGO2     | 0.664061762  | 0.023341233 |
| ENSG00000197818 | SLC9A8   | 0.72859215   | 0.023341233 |
| ENSG00000099800 | TIMM13   | -0.720533109 | 0.023341233 |
| ENSG00000172508 | CARNS1   | -1.485707396 | 0.023400022 |
| ENSG00000116539 | ASH1L    | 0.547707622  | 0.023450197 |
| ENSG00000103152 | MPG      | -0.535601238 | 0.023464566 |
| ENSG00000107874 | CUEDC2   | -0.383210917 | 0.023576584 |
| ENSG00000099377 | HSD3B7   | 1.513181453  | 0.023798187 |
| ENSG00000095059 | DHPS     | -0.602556942 | 0.023798187 |
| ENSG00000162585 | FAAP20   | -0.468043532 | 0.023835383 |
| ENSG00000198917 | SPOUT1   | -0.587528877 | 0.024111185 |
| ENSG00000160050 | CCDC28B  | -0.971277019 | 0.024122808 |
| ENSG00000116521 | SCAMP3   | -0.459754925 | 0.024207964 |
| ENSG00000211598 | IGKV4-1  | -2.813064947 | 0.024207964 |
| ENSG00000206560 | ANKRD28  | 1.283861498  | 0.024207964 |
| ENSG00000167272 | POP5     | -0.854945603 | 0.02432929  |
| ENSG00000178974 | FBXO34   | 0.617300566  | 0.024390219 |
| ENSG00000173848 | NET1     | 1.695556157  | 0.024456599 |

|                 |           |              |             |
|-----------------|-----------|--------------|-------------|
| ENSG00000165516 | KLHDC2    | -0.485259048 | 0.024456599 |
| ENSG00000104964 | AES       | -0.433751564 | 0.024456599 |
| ENSG00000186222 | BLOC1S4   | -0.559900092 | 0.024470398 |
| ENSG00000242686 |           | -2.162350471 | 0.024487354 |
| ENSG00000146072 | TNFRSF21  | 3.710797389  | 0.024499016 |
| ENSG00000101187 | SLCO4A1   | 3.982247529  | 0.024499016 |
| ENSG00000005436 | GCFC2     | -0.572646452 | 0.024565687 |
| ENSG00000170860 | LSM3      | -0.489732634 | 0.024565687 |
| ENSG00000281206 | NA        | -3.368165918 | 0.024565687 |
| ENSG00000099849 | RASSF7    | -0.972206305 | 0.024595753 |
| ENSG00000165813 | CCDC186   | 0.663766732  | 0.024687163 |
| ENSG00000221792 | MIR1282   | -2.544690167 | 0.024687163 |
| ENSG00000041988 | THAP3     | -0.775738062 | 0.024738204 |
| ENSG00000183513 | COA5      | -0.681995003 | 0.024769634 |
| ENSG00000078269 | SYNJ2     | 1.124244178  | 0.024769634 |
| ENSG00000178429 | RPS3AP5   | -0.591234328 | 0.024769634 |
| ENSG00000106733 | NMRK1     | -0.915429515 | 0.024808254 |
| ENSG00000161618 | ALDH16A1  | -0.570966986 | 0.024808254 |
| ENSG00000109927 | TECTA     | 1.621176029  | 0.024825641 |
| ENSG00000225921 | NOL7      | -0.357614315 | 0.024887423 |
| ENSG00000125356 | NDUFA1    | -0.429324296 | 0.024903547 |
| ENSG00000134109 | EDEM1     | 0.588197648  | 0.0249238   |
| ENSG00000272047 | GTF2H5    | -0.603290404 | 0.0249238   |
| ENSG00000158716 | DUSP23    | -0.766487048 | 0.024952719 |
| ENSG00000214293 | APTR      | -0.807379196 | 0.024957679 |
| ENSG00000004779 | NDUFAB1   | -0.604613464 | 0.025040438 |
| ENSG00000279800 | BCLAF1P2  | 1.289804498  | 0.025040438 |
| ENSG00000126934 | MAP2K2    | -0.457215538 | 0.025040438 |
| ENSG00000173120 | KDM2A     | 0.504028514  | 0.025124885 |
| ENSG00000107862 | GBF1      | 0.372153055  | 0.025348284 |
| ENSG00000215421 | ZNF407    | 0.473216201  | 0.025348284 |
| ENSG00000280387 |           | 1.18402471   | 0.025378752 |
| ENSG00000171621 | SPSB1     | 2.114236491  | 0.025381006 |
| ENSG00000164190 | NIPBL     | 0.44846775   | 0.025381006 |
| ENSG00000037749 | MFAP3     | 0.805727863  | 0.025381006 |
| ENSG00000206344 | HCG27     | -1.285257158 | 0.025381006 |
| ENSG00000136936 | XPA       | -0.472543218 | 0.025381006 |
| ENSG00000148450 | MSRB2     | -0.767262355 | 0.025381006 |
| ENSG00000042088 | TDP1      | -0.431474674 | 0.025381006 |
| ENSG00000246067 | RAB30-AS1 | -0.915751057 | 0.025399413 |
| ENSG00000099331 | MYO9B     | 0.482696177  | 0.025399413 |
| ENSG00000176261 | ZBTB8OS   | -0.490437415 | 0.025431111 |
| ENSG00000137496 | IL18BP    | 0.880616844  | 0.025528674 |
| ENSG00000134531 | EMP1      | 2.55052526   | 0.025528674 |
| ENSG00000141699 | FAM134C   | -0.673472558 | 0.025565125 |
| ENSG00000173660 | UQCRH     | -0.384529578 | 0.025588813 |
| ENSG00000213015 | ZNF580    | -0.601527207 | 0.025663166 |
| ENSG00000167969 | ECI1      | -0.600681358 | 0.025743214 |

|                 |          |              |             |
|-----------------|----------|--------------|-------------|
| ENSG0000056972  | TRAF3IP2 | 0.897113637  | 0.026002178 |
| ENSG00000235065 | RPL24P2  | -0.851508615 | 0.02603448  |
| ENSG00000104884 | ERCC2    | -0.624171592 | 0.026050533 |
| ENSG00000166716 | ZNF592   | 0.438000546  | 0.026062079 |
| ENSG00000206417 | H1FX-AS1 | -1.010726089 | 0.026078839 |
| ENSG00000163964 | PIGX     | -0.576009217 | 0.026078839 |
| ENSG00000169902 | TPST1    | 2.392070706  | 0.026078839 |
| ENSG00000139546 | TARBP2   | -0.583239623 | 0.026078839 |
| ENSG00000100288 | CHKB     | -0.584222445 | 0.026078839 |
| ENSG00000171316 | CHD7     | 1.073733163  | 0.026081784 |
| ENSG00000267469 |          | -2.554997863 | 0.026131442 |
| ENSG00000077312 | SNRPA    | -0.558935214 | 0.026131442 |
| ENSG00000184162 | NR2C2AP  | -0.726067336 | 0.02623281  |
| ENSG00000136280 | CCM2     | -0.648850426 | 0.026343438 |
| ENSG00000165113 | GKAP1    | -0.88964509  | 0.026344776 |
| ENSG00000244625 | MIATNB   | -0.690042785 | 0.026501044 |
| ENSG00000184613 | NELL2    | -1.740079443 | 0.026825109 |
| ENSG00000138031 | ADCY3    | 1.297865892  | 0.02690032  |
| ENSG00000130520 | LSM4     | -0.506509294 | 0.027006809 |
| ENSG00000277972 | CISD3    | -0.680067855 | 0.027043623 |
| ENSG00000184508 | HDCC3    | -0.77332777  | 0.027124592 |
| ENSG00000054267 | ARID4B   | 0.421114391  | 0.02719172  |
| ENSG00000075539 | FRYL     | 0.475720877  | 0.02719172  |
| ENSG00000272221 |          | -1.528425184 | 0.02719172  |
| ENSG00000130724 | CHMP2A   | -0.501909261 | 0.02719172  |
| ENSG00000180098 | TRNAU1AP | -0.49471064  | 0.027333643 |
| ENSG00000204954 | C12orf73 | -0.952217125 | 0.027333643 |
| ENSG00000122971 | ACADS    | -0.619653718 | 0.027333643 |
| ENSG00000139597 | N4BP2L1  | -0.554044707 | 0.027333643 |
| ENSG00000182512 | GLRX5    | -0.54314681  | 0.027405529 |
| ENSG00000134262 | AP4B1    | -0.44425215  | 0.027669504 |
| ENSG00000173992 | CCS      | -0.701176639 | 0.027669504 |
| ENSG00000143373 | ZNF687   | 0.479829483  | 0.027690243 |
| ENSG00000152894 | PTPRK    | -1.937761807 | 0.027690243 |
| ENSG00000176641 | RNF152   | 3.483770873  | 0.027718994 |
| ENSG00000114982 | KANSL3   | 0.440411366  | 0.02776254  |
| ENSG00000172348 | RCAN2    | -3.731697861 | 0.02779231  |
| ENSG00000112667 | DNPH1    | -0.789091427 | 0.027850794 |
| ENSG00000114841 | DNAH1    | 0.534116579  | 0.027866299 |
| ENSG00000164292 | RHOBTB3  | 2.007126965  | 0.027866299 |
| ENSG00000146067 | FAM193B  | -0.456480654 | 0.027866299 |
| ENSG00000256338 | RPL41P2  | -1.007196144 | 0.027866299 |
| ENSG00000141503 | MINK1    | 0.498882757  | 0.027866299 |
| ENSG00000125995 | ROMO1    | -0.653782255 | 0.027866299 |
| ENSG00000105373 | GLTSCR2  | -0.508819392 | 0.027866299 |
| ENSG00000162244 | RPL29    | -0.461104731 | 0.027897926 |
| ENSG00000055208 | TAB2     | 0.714201364  | 0.027922011 |
| ENSG00000154723 | ATP5J    | -0.469016379 | 0.028012532 |

|                 |         |              |             |
|-----------------|---------|--------------|-------------|
| ENSG00000224094 | RPS24P8 | -0.613556698 | 0.028034635 |
| ENSG00000176058 | TPRN    | -0.678657317 | 0.0280373   |
| ENSG00000136444 | RSAD1   | -0.636304619 | 0.0280373   |
| ENSG00000243466 | IGKV1-5 | -2.747646761 | 0.028041033 |
| ENSG00000238045 |         | -0.987291268 | 0.028041033 |
| ENSG00000172534 | HCFC1   | 0.491773922  | 0.028087681 |
| ENSG00000132912 | DCTN4   | 0.651916738  | 0.028094624 |
| ENSG00000177600 | RPLP2   | -0.556323162 | 0.028094624 |
| ENSG00000276819 | TRBV15  | -3.14436854  | 0.028126446 |
| ENSG00000149922 | TBX6    | -0.932450331 | 0.028236084 |
| ENSG00000198830 | HMG2    | -0.473773275 | 0.028322698 |
| ENSG00000198816 | ZNF358  | -0.737212475 | 0.028790984 |
| ENSG00000132196 | HSD17B7 | -0.828725168 | 0.028858721 |
| ENSG00000114383 | TUSC2   | -0.42975637  | 0.028864099 |
| ENSG00000279648 |         | 1.261521369  | 0.028950354 |
| ENSG00000211767 | TRBJ2-3 | -3.138841709 | 0.029129037 |
| ENSG00000172296 | SPTLC3  | 1.518676567  | 0.029177577 |
| ENSG00000170242 | USP47   | 0.524550822  | 0.029279897 |
| ENSG00000135905 | DOCK10  | 0.526719754  | 0.029487881 |
| ENSG00000160948 | VPS28   | -0.453991722 | 0.029487881 |
| ENSG00000107263 | RAPGEF1 | 0.794697107  | 0.029487881 |
| ENSG00000120647 | CCDC77  | -0.642454516 | 0.029487881 |
| ENSG00000257303 |         | -1.147572618 | 0.029487881 |
| ENSG00000130052 | STARD8  | 1.440779885  | 0.029531387 |
| ENSG00000111641 | NOP2    | 0.626715697  | 0.029693735 |
| ENSG00000160131 | VMA21   | -0.412572078 | 0.029721222 |
| ENSG00000231672 | DIRC3   | -1.669331958 | 0.029803167 |
| ENSG00000205089 | CCNI2   | -3.132667856 | 0.029803167 |
| ENSG00000164649 | CDCA7L  | -0.838360063 | 0.029861994 |
| ENSG00000183617 | MRPL54  | -0.584433109 | 0.029921019 |
| ENSG00000213079 | SCAF8   | 0.568275652  | 0.029952713 |
| ENSG00000211806 | TRAV25  | -3.150083487 | 0.029952713 |
| ENSG00000245970 |         | -1.424898207 | 0.029957007 |
| ENSG00000124507 | PACSIN1 | -2.900353487 | 0.029967501 |
| ENSG00000137970 | RPL7P9  | -0.468088405 | 0.030003886 |
| ENSG00000168393 | DTYMK   | -0.809829934 | 0.030003886 |
| ENSG00000101997 | CCDC22  | -0.528870618 | 0.030003886 |
| ENSG00000272010 |         | -1.909548289 | 0.030003886 |
| ENSG00000110046 | ATG2A   | 1.03334571   | 0.030003886 |
| ENSG00000127884 | ECHS1   | -0.594112929 | 0.030003886 |
| ENSG00000156535 | CD109   | 2.355823865  | 0.030020281 |
| ENSG00000105619 | TFPT    | -0.567208273 | 0.030052758 |
| ENSG00000091732 | ZC3HC1  | -0.523477153 | 0.030117626 |
| ENSG00000162636 | FAM102B | 0.809820526  | 0.030119011 |
| ENSG00000163001 | CFAP36  | -0.658800152 | 0.030119011 |
| ENSG00000170476 | MZB1    | -2.134287917 | 0.030119011 |
| ENSG00000186432 | KPNA4   | 0.449671953  | 0.030205799 |
| ENSG00000173114 | LRRN3   | -1.945331465 | 0.030205799 |



|                 |              |              |             |
|-----------------|--------------|--------------|-------------|
| ENSG00000196878 | LAMB3        | 4.640058503  | 0.030307255 |
| ENSG00000183207 | RUVBL2       | -0.693767535 | 0.030307255 |
| ENSG00000184436 | THAP7        | -0.527344163 | 0.030408947 |
| ENSG00000148334 | PTGES2       | -0.417092349 | 0.030449131 |
| ENSG00000174721 | FGFBP3       | -0.89856109  | 0.030449131 |
| ENSG00000103363 | TCEB2        | -0.511962579 | 0.030555376 |
| ENSG00000187051 | RPS19BP1     | -0.483204817 | 0.030555376 |
| ENSG00000243317 | C7orf73      | -0.356230575 | 0.030646771 |
| ENSG00000137700 | SLC37A4      | -0.767660534 | 0.030768163 |
| ENSG00000105655 | ISYNA1       | 1.129457882  | 0.030924052 |
| ENSG00000092203 | TOX4         | 0.362644096  | 0.030980072 |
| ENSG00000095564 | BTAF1        | 0.614609346  | 0.031170324 |
| ENSG00000125633 | CCDC93       | 0.497019736  | 0.031231138 |
| ENSG00000247828 | TMEM161B-AS1 | -0.906054292 | 0.031231138 |
| ENSG00000105808 | RASA4        | -0.792830397 | 0.031231138 |
| ENSG00000239697 | TNFSF12      | -0.602025011 | 0.031231138 |
| ENSG00000164967 | RPP25L       | -0.945716033 | 0.031241588 |
| ENSG00000211765 | TRBJ2-2      | -3.128743004 | 0.031268971 |
| ENSG00000273437 |              | -1.480941907 | 0.031323549 |
| ENSG00000256690 |              | -1.35061744  | 0.031323549 |
| ENSG00000241370 | RPP21        | -0.686097162 | 0.031344836 |
| ENSG00000135423 | GLS2         | -3.134035196 | 0.031408719 |
| ENSG00000054654 | SYNE2        | -0.892314379 | 0.031408719 |
| ENSG00000162066 | AMDHD2       | -0.561184696 | 0.031408719 |
| ENSG00000211890 | IGHA2        | -3.043639092 | 0.031431437 |
| ENSG00000167136 | ENDOG        | -0.988204244 | 0.031565691 |
| ENSG00000159445 | THEM4        | -0.917400374 | 0.031650323 |
| ENSG00000213609 | RPL7AP50     | -0.936589701 | 0.03166195  |
| ENSG00000106346 | USP42        | 0.699110953  | 0.03195095  |
| ENSG00000198406 | BZW1P2       | 1.057910367  | 0.031954257 |
| ENSG00000272556 | GTF2IP13     | -0.919675828 | 0.031983814 |
| ENSG00000104983 | CCDC61       | -0.810447964 | 0.031983814 |
| ENSG00000036054 | TBC1D23      | 0.661130285  | 0.031985522 |
| ENSG00000196976 | LAGE3        | -0.81100185  | 0.031985522 |
| ENSG00000226049 | TLK2P1       | 1.406651258  | 0.031985522 |
| ENSG00000164167 | LSM6         | -0.504758442 | 0.032074462 |
| ENSG00000137133 | HINT2        | -0.631687853 | 0.032162283 |
| ENSG00000132254 | ARFIP2       | -0.373804473 | 0.032187691 |
| ENSG00000228889 | UBAC2-AS1    | -1.064954549 | 0.03229863  |
| ENSG00000227766 | HCG4P5       | -1.819950371 | 0.032445553 |
| ENSG00000086102 | NFX1         | 0.665089384  | 0.032445553 |
| ENSG00000115020 | PIKFYVE      | 0.514275688  | 0.032463413 |
| ENSG00000234506 | LINC01506    | -1.091454761 | 0.032561016 |
| ENSG00000274425 |              | -1.245238567 | 0.032561016 |
| ENSG00000213689 | TREX1        | -0.868830453 | 0.032639315 |
| ENSG00000004059 | ARF5         | -0.334508584 | 0.032658839 |
| ENSG00000172985 | SH3RF3       | 2.470593277  | 0.032675987 |
| ENSG00000171858 | RPS21        | -0.520884107 | 0.032675987 |

|                 |           |              |             |
|-----------------|-----------|--------------|-------------|
| ENSG00000130725 | UBE2M     | -0.419222937 | 0.032675987 |
| ENSG00000272886 | DCP1A     | 0.664263129  | 0.032713515 |
| ENSG00000233830 | EIF4HP1   | 0.855207374  | 0.032721838 |
| ENSG00000115307 | AUP1      | -0.261371295 | 0.032800944 |
| ENSG00000072818 | ACAP1     | -0.580695267 | 0.032800944 |
| ENSG00000197417 | SHPK      | -0.817123117 | 0.033029423 |
| ENSG00000131263 | RLIM      | 0.802493937  | 0.033050614 |
| ENSG00000187605 | TET3      | 0.563025251  | 0.033157234 |
| ENSG00000267547 |           | -1.151716539 | 0.033274209 |
| ENSG00000065717 | TLE2      | -1.826407142 | 0.033274209 |
| ENSG00000237976 |           | -1.087958933 | 0.033356063 |
| ENSG00000257433 |           | -0.936390659 | 0.033398898 |
| ENSG00000135441 | BLOC1S1   | -0.583296421 | 0.033398898 |
| ENSG00000258230 |           | 1.880877523  | 0.033398898 |
| ENSG00000230124 | ACBD6     | -0.395426883 | 0.033433735 |
| ENSG00000063241 | ISOC2     | -0.91618381  | 0.033433735 |
| ENSG00000136715 | SAP130    | 0.385084825  | 0.033508369 |
| ENSG00000255760 |           | -1.486432153 | 0.033526628 |
| ENSG00000270091 |           | -0.997941738 | 0.033526628 |
| ENSG00000198680 | TUSC1     | -1.48592915  | 0.033540244 |
| ENSG00000176928 | GCNT4     | -1.706038951 | 0.033542851 |
| ENSG00000113615 | SEC24A    | 0.699303865  | 0.033542851 |
| ENSG00000276997 |           | 0.997353262  | 0.033575959 |
| ENSG00000089009 | RPL6      | -0.362646871 | 0.033575959 |
| ENSG00000233762 |           | -0.663632072 | 0.033650837 |
| ENSG00000243477 | NAT6      | -0.534245084 | 0.033798149 |
| ENSG00000164530 | PI16      | -2.767710551 | 0.033798149 |
| ENSG00000267216 |           | 1.599049828  | 0.033798149 |
| ENSG00000163516 | ANKZF1    | -0.770054168 | 0.033980388 |
| ENSG00000198498 | TMA16     | -0.85210163  | 0.033980388 |
| ENSG00000165219 | GAPVD1    | 0.449676267  | 0.033980388 |
| ENSG00000261996 |           | -3.133718706 | 0.033980388 |
| ENSG00000205078 | SYCE1L    | -1.021721736 | 0.033991493 |
| ENSG00000162496 | DHRS3     | 4.235173009  | 0.034011857 |
| ENSG00000134193 | REG4      | -3.134612984 | 0.034086813 |
| ENSG00000229833 | PET100    | -0.583040601 | 0.03414091  |
| ENSG00000171530 | TBCA      | -0.519696424 | 0.034205608 |
| ENSG00000277496 |           | -1.080679107 | 0.034217811 |
| ENSG00000132465 | JCHAIN    | -2.282890009 | 0.034291752 |
| ENSG00000121753 | ADGRB2    | -3.13423177  | 0.034323713 |
| ENSG00000237765 | FAM200B   | -0.56472199  | 0.034323713 |
| ENSG00000236810 | TCEB3-AS1 | -0.930230335 | 0.034447011 |
| ENSG00000167680 | SEMA6B    | 4.630329697  | 0.034447011 |
| ENSG00000159082 | SYNJ1     | 0.606780167  | 0.034478766 |
| ENSG00000142684 | ZNF593    | -0.692685113 | 0.034509516 |
| ENSG00000225873 | LINC00694 | -0.979060396 | 0.034509516 |
| ENSG00000064313 | TAF2      | 0.45085625   | 0.034509516 |
| ENSG00000245205 | EEF1A1P4  | 2.082654308  | 0.034509516 |

|                 |           |              |             |
|-----------------|-----------|--------------|-------------|
| ENSG00000105202 | FBL       | -0.358253286 | 0.034509516 |
| ENSG00000110200 | ANAPC15   | -0.412695928 | 0.034543209 |
| ENSG00000116786 | PLEKHM2   | 0.687089511  | 0.034720043 |
| ENSG00000163344 | PMVK      | -0.849333057 | 0.034720043 |
| ENSG00000002587 | HS3ST1    | 4.214811479  | 0.034720043 |
| ENSG00000118418 | HMG3      | -0.558436062 | 0.034720043 |
| ENSG00000198467 | TPM2      | -0.881114274 | 0.034720043 |
| ENSG00000133321 | RARRES3   | -0.64986815  | 0.034720043 |
| ENSG00000277662 |           | -1.299843575 | 0.034720043 |
| ENSG00000170175 | CHRNA1    | -0.828973863 | 0.034720043 |
| ENSG00000204584 |           | -0.871994181 | 0.034720043 |
| ENSG00000144711 | IQSEC1    | 0.576502418  | 0.034744985 |
| ENSG00000109756 | RAPGEF2   | 0.726793779  | 0.034776622 |
| ENSG00000280734 | LINC01232 | -0.566448856 | 0.03483338  |
| ENSG00000126264 | HCST      | -0.673432407 | 0.03483338  |
| ENSG00000204859 | ZBTB48    | -0.442831744 | 0.034872497 |
| ENSG00000163374 | YY1AP1    | 0.323546435  | 0.034872497 |
| ENSG00000008056 | SYN1      | 3.570921175  | 0.034956775 |
| ENSG00000104518 | GSDMD     | -0.77677151  | 0.034992233 |
| ENSG00000186468 | RPS23     | -0.415367533 | 0.035065093 |
| ENSG00000166233 | ARIH1     | 0.632115774  | 0.035065093 |
| ENSG00000188011 | RTP5      | 5.027326556  | 0.03512535  |
| ENSG00000170846 |           | -0.7221086   | 0.035135891 |
| ENSG00000140264 | SERF2     | -0.399073562 | 0.035135891 |
| ENSG00000148690 | FRA10AC1  | -0.711114025 | 0.035296032 |
| ENSG00000240972 | MIF       | -0.575281757 | 0.035296032 |
| ENSG00000168488 | ATXN2L    | 0.365518268  | 0.035431286 |
| ENSG00000261643 |           | -1.142226958 | 0.035494446 |
| ENSG00000167700 | MFSD3     | -1.152338368 | 0.035494446 |
| ENSG00000272750 |           | -1.094186671 | 0.035509504 |
| ENSG00000165874 | FAM35BP   | -0.849186131 | 0.035509504 |
| ENSG00000185088 | RPS27L    | -0.403231651 | 0.035509504 |
| ENSG00000233223 |           | -0.984342917 | 0.035509504 |
| ENSG00000167536 | DHRS13    | -0.787779416 | 0.035509504 |
| ENSG00000101363 | MANBAL    | -0.44015654  | 0.035509504 |
| ENSG00000169241 | SLC50A1   | -0.549755493 | 0.035522393 |
| ENSG00000253200 |           | 1.080062197  | 0.035522393 |
| ENSG00000198879 | SFMBT2    | 1.009872758  | 0.035522393 |
| ENSG00000166669 | ATF7IP2   | -0.587252968 | 0.035522393 |
| ENSG00000140829 | DHX38     | 0.370106386  | 0.035522393 |
| ENSG00000005884 | ITGA3     | -1.158850528 | 0.035522393 |
| ENSG00000115268 | RPS15     | -0.497812116 | 0.035522393 |
| ENSG00000129932 | DOHH      | -0.655050634 | 0.035522393 |
| ENSG00000105427 | CNFN      | -1.272617389 | 0.035734522 |
| ENSG00000137502 | RAB30     | -1.33987915  | 0.035843763 |
| ENSG00000082805 | ERC1      | 0.529342446  | 0.035843763 |
| ENSG00000075336 | TIMM21    | -0.622482362 | 0.03593511  |
| ENSG00000100330 | MTMR3     | 0.460353296  | 0.036049747 |

|                 |          |              |             |
|-----------------|----------|--------------|-------------|
| ENSG00000239246 |          | -0.781696498 | 0.036090388 |
| ENSG00000148600 | CDHR1    | -3.138213034 | 0.036102288 |
| ENSG00000183691 | NOG      | -1.972410561 | 0.036117435 |
| ENSG00000168060 | NAALADL1 | -0.723939726 | 0.036160311 |
| ENSG00000102886 | GDPD3    | -0.986775891 | 0.036211636 |
| ENSG00000050426 | LETMD1   | -0.482779896 | 0.036262099 |
| ENSG00000160752 | FDPS     | -0.437762523 | 0.036362095 |
| ENSG00000227057 | WDR46    | -0.605025324 | 0.036413212 |
| ENSG00000180611 | MB21D2   | 2.695103339  | 0.036440443 |
| ENSG00000266472 | MRPS21   | -0.469383388 | 0.036549244 |
| ENSG00000173166 | RAPH1    | 1.555459747  | 0.036549244 |
| ENSG00000160469 | BRSK1    | -2.008328061 | 0.036596343 |
| ENSG00000244398 |          | -0.505156221 | 0.036692324 |
| ENSG00000160789 | LMNA     | 2.260854059  | 0.036705214 |
| ENSG00000161202 | DVL3     | 0.505403401  | 0.036705214 |
| ENSG00000176973 | FAM89B   | -0.658946552 | 0.036723107 |
| ENSG00000164114 | MAP9     | -2.037066706 | 0.036748652 |
| ENSG00000011405 | PIK3C2A  | 0.526700347  | 0.036753474 |
| ENSG00000134291 | TMEM106C | -0.83027396  | 0.036753474 |
| ENSG00000185187 | SIGIRR   | -0.555850669 | 0.036844175 |
| ENSG00000176102 | CSTF3    | -0.521079157 | 0.036844175 |
| ENSG00000186026 | ZNF284   | -1.06684792  | 0.036844175 |
| ENSG00000170445 | HARS     | -0.357359517 | 0.037227683 |
| ENSG00000227008 |          | -0.639990128 | 0.037227683 |
| ENSG00000250571 | GLI4     | -0.540572947 | 0.037227683 |
| ENSG00000143622 | RIT1     | 0.664447278  | 0.037230484 |
| ENSG00000276728 |          | -1.144631216 | 0.037230484 |
| ENSG00000031698 | SARS     | -0.462762811 | 0.037233831 |
| ENSG00000013588 | GPRC5A   | 2.556559033  | 0.037233831 |
| ENSG00000225614 | ZNF469   | 1.661462497  | 0.037233831 |
| ENSG00000173065 | FAM222B  | 0.60139117   | 0.037233831 |
| ENSG00000141446 | ESCO1    | 0.497014238  | 0.037240263 |
| ENSG00000244575 | IGKV1-27 | -3.104042085 | 0.037264327 |
| ENSG00000104129 | DNAJC17  | -0.464809803 | 0.037321913 |
| ENSG00000133935 | C14orf1  | -0.658710655 | 0.037491226 |
| ENSG00000103260 | METRN    | -0.946916408 | 0.037605871 |
| ENSG00000127774 | EMC6     | -0.614312464 | 0.037607826 |
| ENSG00000152969 | JAKMIP1  | -2.882368512 | 0.037609403 |
| ENSG00000167034 | NKX3-1   | 2.341004939  | 0.037609403 |
| ENSG00000277610 | RNVU1-4  | -1.001377715 | 0.037649498 |
| ENSG00000125351 | UPF3B    | -0.554899265 | 0.037649498 |
| ENSG00000054116 | TRAPPC3  | -0.386469139 | 0.037842764 |
| ENSG00000182827 | ACBD3    | 0.604497749  | 0.037842764 |
| ENSG00000144161 | ZC3H8    | -0.581582319 | 0.037842764 |
| ENSG00000118777 | ABCG2    | 4.62118608   | 0.037842764 |
| ENSG00000123219 | CENPK    | -1.552335559 | 0.037842764 |
| ENSG00000196531 | NACA     | -0.324584756 | 0.037842764 |
| ENSG00000263766 |          | -1.013943188 | 0.037842764 |

|                 |          |              |             |
|-----------------|----------|--------------|-------------|
| ENSG00000242299 |          | -0.600059343 | 0.037897903 |
| ENSG00000104936 | DMPK     | -0.925328832 | 0.037925675 |
| ENSG00000115286 | NDUFS7   | -0.41871695  | 0.037966589 |
| ENSG00000225079 | FTH1P22  | -3.145246135 | 0.038144542 |
| ENSG00000172803 | SNX32    | -1.691732441 | 0.038144542 |
| ENSG00000168701 | TMEM208  | -0.586997584 | 0.038144542 |
| ENSG00000015133 | CCDC88C  | 0.518586117  | 0.038170442 |
| ENSG00000112282 | MED23    | 0.511116481  | 0.038177911 |
| ENSG00000183154 |          | 0.858841273  | 0.038177911 |
| ENSG00000268758 | ADGRE4P  | 2.916243913  | 0.038177911 |
| ENSG00000108175 | ZMIZ1    | 0.997346408  | 0.038283131 |
| ENSG00000264577 |          | -2.047081656 | 0.038408804 |
| ENSG00000101132 | PFDN4    | -0.543590927 | 0.038416475 |
| ENSG00000159377 | PSMB4    | -0.326962868 | 0.038475571 |
| ENSG00000143742 | SRP9     | -0.49710727  | 0.038475571 |
| ENSG00000168894 | RNF181   | -0.569500978 | 0.038475571 |
| ENSG00000152784 | PRDM8    | 1.832420454  | 0.038475571 |
| ENSG00000083845 | RPS5     | -0.479993169 | 0.038475571 |
| ENSG00000142252 | GEMIN7   | -0.815185734 | 0.03856322  |
| ENSG00000172992 | DCAKD    | -0.580232999 | 0.038775116 |
| ENSG00000272256 |          | -0.888298201 | 0.038849526 |
| ENSG00000198964 | SGMS1    | 0.618150485  | 0.038849526 |
| ENSG00000075089 | ACTR6    | -0.554268402 | 0.038849526 |
| ENSG00000099814 | CEP170B  | 2.400863132  | 0.038849526 |
| ENSG00000259972 |          | -0.748618274 | 0.038849526 |
| ENSG00000160307 | S100B    | -2.241887589 | 0.038849526 |
| ENSG00000207652 | MIR621   | 3.819437286  | 0.038891609 |
| ENSG00000196396 | PTPN1    | 0.628100761  | 0.038936863 |
| ENSG00000143365 | RORC     | -2.50333728  | 0.038957382 |
| ENSG00000213614 | HEXA     | -0.335577228 | 0.038985474 |
| ENSG00000183856 | IQGAP3   | 3.666347635  | 0.039159362 |
| ENSG00000241973 | PI4KA    | 0.371268385  | 0.039190661 |
| ENSG00000090263 | MRPS33   | -0.603244457 | 0.039195073 |
| ENSG00000143442 | POGZ     | 0.368986727  | 0.039531694 |
| ENSG00000056097 | ZFR      | 0.368369844  | 0.039531694 |
| ENSG00000176485 | PLA2G16  | -1.193605918 | 0.039531694 |
| ENSG00000102977 | ACD      | -0.671711797 | 0.039531694 |
| ENSG00000198918 | RPL39    | -0.458895957 | 0.039550276 |
| ENSG00000173465 | SSSCA1   | -0.544505937 | 0.039693033 |
| ENSG00000188211 | NCR3LG1  | 2.352754732  | 0.0399304   |
| ENSG00000102871 | TRADD    | -0.744357518 | 0.0399304   |
| ENSG00000149600 | COMMD7   | -0.376624037 | 0.0399304   |
| ENSG00000079616 | KIF22    | -0.494760231 | 0.04002808  |
| ENSG00000089289 | IGBP1    | -0.335047747 | 0.04006359  |
| ENSG00000125430 | HS3ST3B1 | 2.154403761  | 0.040267757 |
| ENSG00000176978 | DPP7     | -0.404499071 | 0.040267896 |
| ENSG00000116288 | PARK7    | -0.437181375 | 0.040293696 |
| ENSG00000267745 |          | -0.8100025   | 0.040293696 |

|                 |             |              |             |
|-----------------|-------------|--------------|-------------|
| ENSG00000066583 | ISOC1       | -0.627870879 | 0.04032593  |
| ENSG00000125450 | NUP85       | -0.398775131 | 0.040592692 |
| ENSG00000165644 | COMTD1      | -0.893950878 | 0.040610066 |
| ENSG00000174788 | PCP2        | -1.020760564 | 0.040697684 |
| ENSG00000260778 | MIR940      | -1.109840597 | 0.040734363 |
| ENSG00000275963 |             | -1.298079871 | 0.04075364  |
| ENSG00000079313 | REXO1       | 0.479942387  | 0.04075364  |
| ENSG00000065518 | NDUFB4      | -0.396480005 | 0.040855389 |
| ENSG00000268836 |             | -1.393338904 | 0.040874666 |
| ENSG00000125652 | ALKBH7      | -0.590172107 | 0.041000836 |
| ENSG00000204498 | NFKBIL1     | -0.538349511 | 0.041101864 |
| ENSG00000134056 | MRPS36      | -0.477634342 | 0.041129802 |
| ENSG00000005889 | ZFX         | 0.430223485  | 0.041129802 |
| ENSG00000211956 | IGHV4-34    | -2.172525313 | 0.041136114 |
| ENSG00000250151 | ARPC4-TTLL3 | 1.278367205  | 0.04121907  |
| ENSG00000053900 | ANAPC4      | -0.452468824 | 0.04122998  |
| ENSG00000113716 | HMGXB3      | 0.515021026  | 0.04122998  |
| ENSG00000188994 | ZNF292      | 0.646942274  | 0.04122998  |
| ENSG00000111850 | SMIM8       | -0.709960319 | 0.04122998  |
| ENSG00000164896 | FASTK       | -0.464674551 | 0.04122998  |
| ENSG00000140093 | SERPINA10   | 1.081806644  | 0.04122998  |
| ENSG00000176182 | MYPOP       | -0.644262633 | 0.041252576 |
| ENSG00000136068 | FLNB        | 1.255746722  | 0.041307809 |
| ENSG00000244313 |             | -0.495374021 | 0.041307809 |
| ENSG00000059573 | ALDH18A1    | -0.78946868  | 0.041307809 |
| ENSG00000155366 | RHOC        | -0.999335826 | 0.041575484 |
| ENSG00000151366 | NDUFC2      | -0.480518107 | 0.041775988 |
| ENSG00000152484 | USP12       | 0.612807653  | 0.041812197 |
| ENSG00000152942 | RAD17       | -0.43926317  | 0.041876117 |
| ENSG00000214837 | LINC01347   | 0.683228702  | 0.042079574 |
| ENSG00000064989 | CALCRL      | 1.015284999  | 0.042079574 |
| ENSG00000172215 | CXCR6       | -3.094011166 | 0.042079574 |
| ENSG00000137411 | VAR2        | -0.677797605 | 0.042079574 |
| ENSG00000137038 | TMEM261     | -0.697762687 | 0.042079574 |
| ENSG00000178385 | PLEKHM3     | 0.739302205  | 0.042112829 |
| ENSG00000105701 | FKBP8       | -0.329476009 | 0.042139473 |
| ENSG00000175556 | LONRF3      | 1.623222537  | 0.042344602 |
| ENSG00000163681 | SLMAP       | 0.360179808  | 0.042350077 |
| ENSG00000141295 | SCRN2       | -0.646756333 | 0.042433675 |
| ENSG00000007392 | LUC7L       | -0.425680524 | 0.042435215 |
| ENSG00000213339 | QTRT1       | -0.531245531 | 0.042437675 |
| ENSG00000182584 | ACTL10      | -1.479857702 | 0.042639209 |
| ENSG00000114391 | RPL24       | -0.374240223 | 0.042687469 |
| ENSG00000196510 | ANAPC7      | -0.481863706 | 0.042687469 |
| ENSG00000183604 | SMG1P5      | 0.880796342  | 0.042687469 |
| ENSG00000275895 | U2AF1L5     | 5.913744174  | 0.042687469 |
| ENSG00000147996 | CBWD5       | -0.688029137 | 0.042785673 |
| ENSG00000187713 | TMEM203     | -0.636473079 | 0.042785673 |

|                 |          |              |             |
|-----------------|----------|--------------|-------------|
| ENSG00000164081 | TEX264   | -0.540537203 | 0.042968209 |
| ENSG00000162407 | PLPP3    | 3.145969591  | 0.043022223 |
| ENSG00000138081 | FBXO11   | 0.449977243  | 0.043022223 |
| ENSG00000153563 | CD8A     | -2.050716022 | 0.043022223 |
| ENSG00000156453 | PCDH1    | -3.12587616  | 0.043022223 |
| ENSG00000211892 | IGHG4    | -3.166033524 | 0.043022223 |
| ENSG00000125863 | MKKS     | -0.897783103 | 0.043022223 |
| ENSG00000276712 | MIR7111  | -1.361628487 | 0.043024639 |
| ENSG00000243302 |          | 0.718076454  | 0.043024639 |
| ENSG00000083838 | ZNF446   | -0.512358189 | 0.043024639 |
| ENSG00000138138 | ATAD1    | -0.479364235 | 0.04305438  |
| ENSG00000100911 | PSME2    | -0.626742098 | 0.043168295 |
| ENSG00000074054 | CLASP1   | 0.476317638  | 0.043224672 |
| ENSG00000100417 | PMM1     | -0.44781228  | 0.043234026 |
| ENSG00000197756 | RPL37A   | -0.445030749 | 0.043352636 |
| ENSG00000117543 | DPH5     | -0.549269986 | 0.043532228 |
| ENSG00000038358 | EDC4     | 0.486825432  | 0.04355646  |
| ENSG00000270605 |          | -1.147999537 | 0.043560072 |
| ENSG00000169031 | COL4A3   | -2.784241315 | 0.043596329 |
| ENSG00000185201 | IFITM2   | -0.680326556 | 0.043596329 |
| ENSG00000089248 | ERP29    | -0.335387141 | 0.043596329 |
| ENSG00000007376 | RPUSD1   | -0.479283752 | 0.043596329 |
| ENSG00000165283 | STOML2   | -0.403867517 | 0.043602501 |
| ENSG00000241839 | PLEKHO2  | 1.038009555  | 0.043602501 |
| ENSG00000181284 | TMEM102  | -0.911080072 | 0.043602501 |
| ENSG00000134250 | NOTCH2   | 0.552101049  | 0.04367452  |
| ENSG00000165029 | ABCA1    | 2.249596942  | 0.043707196 |
| ENSG00000224051 | CPTP     | -0.728960139 | 0.043714595 |
| ENSG00000159267 | HLCS     | 0.687399117  | 0.043782987 |
| ENSG00000204397 | CARD16   | -0.617636936 | 0.043795369 |
| ENSG00000139514 | SLC7A1   | 0.96426974   | 0.044117767 |
| ENSG00000175518 | UBQLNL   | -1.764303285 | 0.044146853 |
| ENSG00000106628 | POLD2    | -0.550058631 | 0.044175918 |
| ENSG00000008513 | ST3GAL1  | 0.614799761  | 0.044175918 |
| ENSG00000076108 | BAZ2A    | 0.500597808  | 0.04433456  |
| ENSG00000173064 | HECTD4   | 0.495802002  | 0.044356752 |
| ENSG00000013619 | MAMLD1   | 3.182839061  | 0.044431646 |
| ENSG00000111906 | HDDC2    | -0.621072395 | 0.044687602 |
| ENSG00000170515 | PA2G4    | -0.543868305 | 0.044687602 |
| ENSG00000103160 | HSDL1    | -0.424304955 | 0.044687602 |
| ENSG00000165821 | SALL2    | -2.520845648 | 0.0446893   |
| ENSG00000108021 | FAM208B  | 0.520706809  | 0.04473796  |
| ENSG00000175416 | CLTB     | -0.441417134 | 0.044813376 |
| ENSG00000108465 | CDK5RAP3 | -0.397619978 | 0.044890508 |
| ENSG00000221983 | UBA52    | -0.378732299 | 0.044890508 |
| ENSG00000162639 | HENMT1   | -0.614746534 | 0.045033552 |
| ENSG00000204099 | NEU4     | 4.571648435  | 0.045252122 |
| ENSG00000130340 | SNX9     | 1.710301274  | 0.045252122 |

|                 |              |              |             |
|-----------------|--------------|--------------|-------------|
| ENSG00000164985 | PSIP1        | -0.477574706 | 0.045252122 |
| ENSG00000100731 | PCNX1        | 0.48188969   | 0.045254671 |
| ENSG00000185808 | PIGP         | -0.579636581 | 0.045263533 |
| ENSG00000279417 |              | 1.17850504   | 0.045319801 |
| ENSG00000158042 | MRPL17       | -0.851891606 | 0.045339578 |
| ENSG00000108559 | NUP88        | -0.410590254 | 0.045375128 |
| ENSG00000005483 | KMT2E        | 0.556782054  | 0.045426292 |
| ENSG00000153815 | CMIP         | 0.414299968  | 0.045426292 |
| ENSG00000113312 | TTC1         | -0.565693253 | 0.045661177 |
| ENSG00000214160 | ALG3         | -0.477797403 | 0.045678508 |
| ENSG00000136271 | DDX56        | -0.348796062 | 0.045678508 |
| ENSG00000113742 | CPEB4        | 0.613652719  | 0.045793706 |
| ENSG00000196459 | TRAPPC2      | -0.632702775 | 0.045793706 |
| ENSG00000266094 | RASSF5       | 0.481892776  | 0.045806928 |
| ENSG00000169129 | AFAP1L2      | -2.635499441 | 0.045806928 |
| ENSG00000146066 | HIGD2A       | -0.406287221 | 0.045985098 |
| ENSG00000119632 | IFI27L2      | -0.661359919 | 0.045985098 |
| ENSG00000100804 | PSMB5        | -0.626161402 | 0.046091549 |
| ENSG00000169696 | ASPSR1       | -0.532934677 | 0.046091549 |
| ENSG00000141867 | BRD4         | 0.394385805  | 0.046091549 |
| ENSG00000198855 | FICD         | 0.736091453  | 0.046333313 |
| ENSG00000068120 | COASY        | -0.487687283 | 0.046333353 |
| ENSG00000279838 |              | 1.125539749  | 0.046444112 |
| ENSG00000165264 | NDUFB6       | -0.643801407 | 0.046444112 |
| ENSG00000234608 | MAPKAPK5-AS1 | -0.578323069 | 0.046453159 |
| ENSG00000163682 | RPL9         | -0.486288806 | 0.046509883 |
| ENSG00000149806 | FAU          | -0.39010556  | 0.04656741  |
| ENSG00000163960 | UBXN7        | 0.469049934  | 0.046642192 |
| ENSG00000198218 | QRICH1       | 0.399087459  | 0.046739914 |
| ENSG00000165288 | BRWD3        | 0.461127357  | 0.046739914 |
| ENSG00000253865 |              | -1.512638706 | 0.046822565 |
| ENSG00000124177 | CHD6         | 0.496285604  | 0.046827136 |
| ENSG00000276278 |              | -0.830475578 | 0.046855934 |
| ENSG00000261596 |              | -0.8753326   | 0.046855934 |
| ENSG00000127054 | CPSF3L       | -0.333532212 | 0.046870577 |
| ENSG00000233184 |              | -0.83810111  | 0.046870577 |
| ENSG00000243943 | ZNF512       | -0.760413436 | 0.046870577 |
| ENSG00000153827 | TRIP12       | 0.343271928  | 0.046870577 |
| ENSG00000235043 | TECRP1       | -0.89425472  | 0.046870577 |
| ENSG00000140396 | NCOA2        | 0.437324447  | 0.046870577 |
| ENSG00000211792 | TRAV14DV4    | -2.825447806 | 0.046870577 |
| ENSG00000158545 | ZC3H18       | 0.370776374  | 0.046870577 |
| ENSG00000175826 | CTDNEP1      | -0.281163998 | 0.046870577 |
| ENSG00000132635 | PCED1A       | -0.467450736 | 0.046870577 |
| ENSG00000174851 | YIF1A        | -0.580696444 | 0.047034157 |
| ENSG00000158865 | SLC5A11      | 4.463636688  | 0.047034157 |
| ENSG00000105618 | PRPF31       | -0.250974817 | 0.047034157 |
| ENSG00000062524 | LTK          | -1.752478068 | 0.047155952 |



|                 |           |              |             |
|-----------------|-----------|--------------|-------------|
| ENSG00000174775 | HRAS      | -0.527554391 | 0.047199047 |
| ENSG00000218208 | RPS27AP11 | -1.358157596 | 0.047273666 |
| ENSG00000170962 | PDGFD     | -2.848460513 | 0.047273666 |
| ENSG00000083750 | RRAGB     | -0.47812908  | 0.047298109 |
| ENSG00000176542 | USF3      | 0.552887719  | 0.047449321 |
| ENSG00000176171 | BNIP3     | -0.674813715 | 0.047449321 |
| ENSG00000117519 | CNN3      | -2.418513176 | 0.047549774 |
| ENSG00000113648 | H2AFY     | 0.409077499  | 0.047549774 |
| ENSG00000211727 | TRBV7-6   | -2.8067004   | 0.047549774 |
| ENSG00000228956 | SATB1-AS1 | -1.150655167 | 0.047632971 |
| ENSG00000156469 | MTERF3    | -0.579078213 | 0.047632971 |
| ENSG00000277147 | LINC00869 | -0.611240371 | 0.047848454 |
| ENSG00000065613 | SLK       | 0.482132723  | 0.047848454 |
| ENSG00000177374 | HIC1      | 2.512285629  | 0.047848454 |
| ENSG00000099901 | RANBP1    | -0.527919484 | 0.047848454 |
| ENSG00000146535 | GNA12     | 0.715639718  | 0.04800415  |
| ENSG00000165685 | TMEM52B   | 1.930705573  | 0.048029777 |
| ENSG00000212864 | RNF208    | -1.188753499 | 0.04803598  |
| ENSG00000276557 | TRBV18    | -2.80364527  | 0.048122956 |
| ENSG00000005007 | UPF1      | 0.327711974  | 0.04816041  |
| ENSG00000185909 | KLHDC8B   | -0.910884779 | 0.048210537 |
| ENSG00000211749 | TRBV23-1  | -2.202724337 | 0.048210537 |
| ENSG00000125485 | DDX31     | -0.705100038 | 0.048210537 |
| ENSG00000105705 | SUGP1     | -0.446533939 | 0.048210537 |
| ENSG00000163814 | CDCP1     | 2.585311156  | 0.048273761 |
| ENSG00000198034 | RPS4X     | -0.374882348 | 0.048273761 |
| ENSG00000184224 | C11orf72  | -0.590217528 | 0.048273761 |
| ENSG00000235194 | PPP1R3E   | -0.676363427 | 0.048273761 |
| ENSG00000170160 | CCDC144A  | 2.0941978    | 0.048273761 |
| ENSG00000176083 | ZNF683    | -2.746475406 | 0.048297436 |
| ENSG00000136938 | ANP32B    | -0.413056473 | 0.048297436 |
| ENSG00000211799 | TRAV19    | -2.622837243 | 0.048297436 |
| ENSG00000161970 | RPL26     | -0.425785903 | 0.048297436 |
| ENSG00000095066 | HOOK2     | -0.586715222 | 0.048297436 |
| ENSG00000123349 | PFDN5     | -0.378672844 | 0.048338906 |
| ENSG00000246089 |           | -0.859377388 | 0.048349634 |
| ENSG00000174365 | SNHG11    | -0.548663065 | 0.048349634 |
| ENSG00000232573 | RPL3P4    | -0.513539086 | 0.048400112 |
| ENSG00000108107 | RPL28     | -0.498554608 | 0.048505086 |
| ENSG00000141741 | MIEN1     | -0.433235287 | 0.048578998 |
| ENSG00000175691 | ZNF77     | -0.661634871 | 0.048597452 |
| ENSG00000221957 | KIR2DS4   | -2.836379083 | 0.048630853 |
| ENSG00000171604 | CXXC5     | 1.237317544  | 0.048660088 |
| ENSG00000196405 | EVL       | -0.561072486 | 0.04878382  |
| ENSG00000105372 | RPS19     | -0.450332596 | 0.04878382  |
| ENSG00000170310 | STX8      | -0.562564209 | 0.048815188 |
| ENSG00000138434 | SSFA2     | 0.528129852  | 0.0488323   |
| ENSG00000275210 |           | 1.076490581  | 0.049225823 |

|                 |         |              |             |
|-----------------|---------|--------------|-------------|
| ENSG00000123636 | BAZ2B   | 0.560267986  | 0.04934826  |
| ENSG00000111237 | VPS29   | -0.430740893 | 0.04934826  |
| ENSG00000165795 | NDRG2   | -0.658068382 | 0.049404882 |
| ENSG00000175334 | BANF1   | -0.649785154 | 0.049445404 |
| ENSG00000055483 | USP36   | 1.123912858  | 0.049483958 |
| ENSG00000088826 | SMOX    | 2.190063302  | 0.049483958 |
| ENSG00000116213 | WRAP73  | -0.433489267 | 0.04952632  |
| ENSG00000121743 | GJA3    | 4.694189654  | 0.049555674 |
| ENSG00000232164 |         | 1.005172495  | 0.04964665  |
| ENSG00000166260 | COX11   | -0.576599855 | 0.049649613 |
| ENSG00000161671 | EMC10   | -0.255675902 | 0.049649613 |
| ENSG00000151612 | ZNF827  | -1.351829445 | 0.049771673 |
| ENSG00000096080 | MRPS18A | -0.526340363 | 0.049801233 |
| ENSG00000143924 | EML4    | 0.660037635  | 0.049852282 |
