# Supplementary material for: Role of CD14+ monocyte-derived oxidised mitochondrial DNA in the inflammatory interferon type 1 signature in juvenile dermatomyositis
Source: PubMed Central journal article supplement (PMC10176342; doi:10.1136/ard-2022-223469), 2022-12-23
Supplement: ard-2022-223469supp004.pdf [file ard-2022-223469supp004.pdf]

**Supplementary Table 3 - JDM pre-treatment vs on-treatment significantly DEG ( $p \leq 0.05$ )**

| Ensemble ID     | hgnc_symbol | log fold change | Adjusted p value |
|-----------------|-------------|-----------------|------------------|
| ENSG00000185885 | IFITM1      | 3.39862585      | 4.74E-33         |
| ENSG00000055130 | CUL1        | 1.164987546     | 3.41E-25         |
| ENSG00000172183 | ISG20       | 2.238676981     | 1.46E-23         |
| ENSG00000183486 | MX2         | 2.125286181     | 9.79E-22         |
| ENSG00000136816 | TOR1B       | 1.710487232     | 5.11E-21         |
| ENSG00000134321 | RSAD2       | 3.866490322     | 3.14E-20         |
| ENSG00000124256 | ZBP1        | 2.703954114     | 4.35E-20         |
| ENSG00000138646 | HERC5       | 3.179408173     | 9.85E-20         |
| ENSG00000119922 | IFIT2       | 3.804908949     | 2.40E-19         |
| ENSG00000138035 | PNPT1       | 1.77089402      | 3.41E-19         |
| ENSG00000140464 | PML         | 1.333071397     | 4.59E-19         |
| ENSG00000165185 | KIAA1958    | 1.555823901     | 5.45E-19         |
| ENSG00000130487 | KLHDC7B     | 2.573064724     | 5.45E-19         |
| ENSG00000059378 | PARP12      | 1.457083108     | 2.77E-18         |
| ENSG00000184979 | USP18       | 4.107072601     | 2.77E-18         |
| ENSG00000163644 | PPM1K       | 1.890727422     | 1.28E-17         |
| ENSG00000187608 | ISG15       | 3.03596484      | 1.51E-17         |
| ENSG00000107201 | DDX58       | 2.13754173      | 2.14E-17         |
| ENSG00000137200 | CMTR1       | 1.092391744     | 3.45E-17         |
| ENSG00000115267 | IFIH1       | 1.934848208     | 9.16E-16         |
| ENSG00000138642 | HERC6       | 2.337045112     | 1.80E-15         |
| ENSG00000132274 | TRIM22      | 1.28588343      | 1.95E-15         |
| ENSG00000100220 | RTCB        | 1.199853067     | 1.98E-15         |
| ENSG00000188157 | AGRN        | 2.05537899      | 2.86E-15         |
| ENSG00000086065 | CHMP5       | 1.371126076     | 5.01E-15         |
| ENSG00000108771 | DHX58       | 1.848937929     | 6.53E-15         |
| ENSG00000163666 | HESX1       | 3.695272206     | 6.61E-15         |
| ENSG00000137628 | DDX60       | 2.127830975     | 6.61E-15         |
| ENSG00000157601 | MX1         | 2.598859926     | 1.73E-14         |
| ENSG00000160710 | ADAR        | 0.977133921     | 2.02E-14         |
| ENSG00000105726 | ATP13A1     | 0.976478109     | 3.23E-14         |
| ENSG00000173193 | PARP14      | 1.576849779     | 3.99E-14         |
| ENSG00000055332 | EIF2AK2     | 1.601466148     | 6.89E-14         |
| ENSG00000111912 | NCOA7       | 1.360989368     | 7.47E-14         |
| ENSG00000017483 | SLC38A5     | 2.431681538     | 7.47E-14         |
| ENSG00000172432 | GTPBP2      | 0.890297882     | 8.81E-14         |
| ENSG00000205413 | SAMD9       | 2.142860258     | 9.27E-14         |
| ENSG00000185745 | IFIT1       | 4.09959233      | 1.09E-13         |
| ENSG00000134326 | CMPK2       | 2.888452244     | 1.40E-13         |
| ENSG00000111335 | OAS2        | 2.603698835     | 1.44E-13         |
| ENSG00000130589 | HELZ2       | 1.632039344     | 1.73E-13         |
| ENSG00000164054 | SHISA5      | 1.074129998     | 2.00E-13         |
| ENSG00000160932 | LY6E        | 1.955040544     | 3.81E-13         |
| ENSG00000138385 | SSB         | 0.93349414      | 3.88E-13         |

|                 |          |              |          |
|-----------------|----------|--------------|----------|
| ENSG00000137198 | GMPR     | 3.067849652  | 7.88E-13 |
| ENSG00000068079 | IFI35    | 1.613553029  | 1.41E-12 |
| ENSG00000185201 | IFITM2   | 1.26248619   | 2.89E-12 |
| ENSG00000170581 | STAT2    | 1.353047658  | 2.92E-12 |
| ENSG00000118922 | KLF12    | -1.403238223 | 3.65E-12 |
| ENSG00000111331 | OAS3     | 2.585404184  | 6.99E-12 |
| ENSG00000162614 | NEXN     | 2.681249354  | 8.16E-12 |
| ENSG00000154122 | ANKH     | -1.750924848 | 8.84E-12 |
| ENSG00000105939 | ZC3HAV1  | 0.950150676  | 1.11E-11 |
| ENSG00000196116 | TDRD7    | 1.251876971  | 1.20E-11 |
| ENSG00000137959 | IFI44L   | 3.167495964  | 1.32E-11 |
| ENSG00000117010 | ZNF684   | 1.305517008  | 1.37E-11 |
| ENSG00000138496 | PARP9    | 1.979935564  | 1.46E-11 |
| ENSG00000100129 | EIF3L    | -0.808894816 | 1.60E-11 |
| ENSG00000122643 | NT5C3A   | 1.527976155  | 1.96E-11 |
| ENSG00000162496 | DHRS3    | -7.188957132 | 2.02E-11 |
| ENSG00000126709 | IFI6     | 2.337677573  | 2.75E-11 |
| ENSG00000076685 | NT5C2    | 0.639429253  | 3.22E-11 |
| ENSG00000137965 | IFI44    | 2.419785274  | 3.35E-11 |
| ENSG00000145287 | PLAC8    | 1.458065947  | 4.91E-11 |
| ENSG00000152102 | FAM168B  | -0.662531972 | 6.19E-11 |
| ENSG00000119917 | IFIT3    | 3.650993356  | 6.50E-11 |
| ENSG00000146859 | TMEM140  | 1.582845349  | 6.89E-11 |
| ENSG00000185507 | IRF7     | 1.716623152  | 7.29E-11 |
| ENSG00000108700 | CCL8     | 5.675703163  | 7.62E-11 |
| ENSG00000108679 | LGALS3BP | 2.067284751  | 8.43E-11 |
| ENSG00000133106 | EPSTI1   | 2.031143247  | 9.29E-11 |
| ENSG00000111344 | RASAL1   | -6.839063999 | 1.22E-10 |
| ENSG00000163840 | DTX3L    | 1.708226909  | 2.62E-10 |
| ENSG00000188542 | DUSP28   | -0.714087951 | 2.62E-10 |
| ENSG00000247317 |          | 2.306715849  | 2.85E-10 |
| ENSG00000106603 | COA1     | 0.850492432  | 3.15E-10 |
| ENSG00000137414 | FAM8A1   | 0.969940671  | 3.28E-10 |
| ENSG00000102921 | N4BP1    | 0.91262895   | 4.33E-10 |
| ENSG00000130813 | C19orf66 | 0.991247446  | 6.69E-10 |
| ENSG00000132530 | XAF1     | 2.318501921  | 9.68E-10 |
| ENSG00000136147 | PHF11    | 0.907090338  | 1.01E-09 |
| ENSG00000163565 | IFI16    | 1.503157981  | 1.02E-09 |
| ENSG00000226950 | DANCR    | -1.353528168 | 1.36E-09 |
| ENSG00000135899 | SP110    | 1.265405777  | 1.37E-09 |
| ENSG00000273314 |          | 1.60592131   | 1.39E-09 |
| ENSG00000035720 | STAP1    | 2.855107916  | 1.61E-09 |
| ENSG00000105655 | ISYNA1   | -1.63253399  | 2.30E-09 |
| ENSG00000168394 | TAP1     | 1.113012556  | 2.48E-09 |
| ENSG00000130595 | TNNT3    | -2.729036726 | 2.52E-09 |
| ENSG00000131979 | GCH1     | 0.985678555  | 2.66E-09 |
| ENSG00000132109 | TRIM21   | 1.466413305  | 2.80E-09 |
| ENSG00000152766 | ANKRD22  | 2.152048724  | 3.21E-09 |

|                 |          |              |          |
|-----------------|----------|--------------|----------|
| ENSG00000204977 | TRIM13   | -1.089383113 | 3.93E-09 |
| ENSG00000177409 | SAMD9L   | 2.362901281  | 3.97E-09 |
| ENSG00000168395 | ING5     | -0.888022519 | 6.13E-09 |
| ENSG00000173786 | CNP      | 1.218181809  | 6.45E-09 |
| ENSG00000196684 | HSH2D    | 1.342544902  | 6.51E-09 |
| ENSG00000244242 | IFITM10  | -3.373797553 | 6.78E-09 |
| ENSG00000173511 | VEGFB    | -2.291712704 | 6.87E-09 |
| ENSG00000143153 | ATP1B1   | -1.982808024 | 7.41E-09 |
| ENSG00000272666 |          | 2.340167326  | 7.95E-09 |
| ENSG00000132256 | TRIM5    | 1.7459755    | 8.59E-09 |
| ENSG00000105875 | WDR91    | -0.747971626 | 9.11E-09 |
| ENSG00000114554 | PLXNA1   | -1.546334268 | 9.98E-09 |
| ENSG00000020577 | SAMD4A   | 1.762586794  | 1.69E-08 |
| ENSG00000011295 | TTC19    | -0.927237278 | 1.74E-08 |
| ENSG00000002549 | LAP3     | 1.358550585  | 1.77E-08 |
| ENSG00000106785 | TRIM14   | 1.384610627  | 2.06E-08 |
| ENSG00000206190 | ATP10A   | 1.571632761  | 2.10E-08 |
| ENSG00000186918 | ZNF395   | -1.034639557 | 2.16E-08 |
| ENSG00000120885 | CLU      | 2.768088043  | 2.16E-08 |
| ENSG00000136514 | RTP4     | 2.01509088   | 2.26E-08 |
| ENSG00000090621 | PABPC4   | -0.890861943 | 2.78E-08 |
| ENSG00000118971 | CCND2    | -1.344484191 | 2.88E-08 |
| ENSG00000115548 | KDM3A    | -1.014779224 | 2.98E-08 |
| ENSG00000169116 | PARM1    | -3.366287644 | 3.15E-08 |
| ENSG00000197381 | ADARB1   | 1.035654568  | 3.36E-08 |
| ENSG00000011028 | MRC2     | -5.213021828 | 3.50E-08 |
| ENSG00000187109 | NAP1L1   | -0.673935184 | 3.87E-08 |
| ENSG00000151012 | SLC7A11  | -4.836930734 | 4.24E-08 |
| ENSG00000223960 |          | 1.301859947  | 4.28E-08 |
| ENSG00000184205 | TSPYL2   | -2.231777018 | 4.52E-08 |
| ENSG00000063046 | EIF4B    | -0.711048257 | 5.39E-08 |
| ENSG00000167658 | EEF2     | -0.518344329 | 6.05E-08 |
| ENSG00000152778 | IFIT5    | 1.658173162  | 7.45E-08 |
| ENSG00000160683 | CXCR5    | -3.467915731 | 9.19E-08 |
| ENSG00000142303 | ADAMTS10 | -1.464790211 | 9.78E-08 |
| ENSG00000181381 | DDX60L   | 1.280730632  | 1.00E-07 |
| ENSG00000249115 | HAUS5    | -0.672667761 | 1.03E-07 |
| ENSG00000160223 | ICOSLG   | -2.039035137 | 1.08E-07 |
| ENSG00000204252 | HLA-DOA  | -1.638926132 | 1.17E-07 |
| ENSG00000225964 | NRIR     | 2.436769194  | 1.19E-07 |
| ENSG00000126351 | THRA     | -1.035777727 | 1.32E-07 |
| ENSG00000106605 | BLVRA    | 1.206214582  | 1.32E-07 |
| ENSG00000168036 | CTNNB1   | -0.83374275  | 1.36E-07 |
| ENSG00000183049 | CAMK1D   | -0.733665124 | 1.44E-07 |
| ENSG00000138190 | EXOC6    | 0.765153527  | 1.51E-07 |
| ENSG00000186806 | VSIG10L  | 1.262496147  | 1.60E-07 |
| ENSG00000111224 | PARP11   | 0.866476841  | 1.72E-07 |
| ENSG00000135114 | OASL     | 2.504420841  | 1.72E-07 |

|                 |           |              |          |
|-----------------|-----------|--------------|----------|
| ENSG00000136807 | CDK9      | -0.539151053 | 1.88E-07 |
| ENSG00000274307 |           | 1.336375001  | 1.88E-07 |
| ENSG00000173821 | RNF213    | 1.004067082  | 2.07E-07 |
| ENSG00000188042 | ARL4C     | -1.774995168 | 2.14E-07 |
| ENSG00000114942 | EEF1B2    | -0.601299458 | 2.34E-07 |
| ENSG00000173166 | RAPH1     | -1.95395738  | 2.63E-07 |
| ENSG00000166889 | PATL1     | 0.713042639  | 2.65E-07 |
| ENSG00000122406 | RPL5      | -0.537680981 | 3.44E-07 |
| ENSG00000142089 | IFITM3    | 2.029849262  | 3.51E-07 |
| ENSG00000177374 | HIC1      | -3.240136612 | 3.51E-07 |
| ENSG00000169245 | CXCL10    | 3.806084402  | 3.59E-07 |
| ENSG00000196141 | SPATS2L   | 2.014015163  | 3.90E-07 |
| ENSG00000155252 | PI4K2A    | -1.562633789 | 4.07E-07 |
| ENSG00000166016 | ABTB2     | 2.093295717  | 4.48E-07 |
| ENSG00000078043 | PIAS2     | -0.614212044 | 4.54E-07 |
| ENSG00000104660 | LEPROTL1  | 0.900080769  | 4.62E-07 |
| ENSG00000099381 | SETD1A    | -0.666231938 | 4.67E-07 |
| ENSG00000205837 | LINC00487 | 3.087271877  | 4.93E-07 |
| ENSG00000107554 | DNMBP     | -0.952033074 | 5.54E-07 |
| ENSG00000277511 |           | 1.77450674   | 5.56E-07 |
| ENSG00000137496 | IL18BP    | -1.040802477 | 5.67E-07 |
| ENSG00000038210 | PI4K2B    | 1.163066402  | 5.86E-07 |
| ENSG00000213923 | CSNK1E    | -0.766043381 | 6.19E-07 |
| ENSG00000141580 | WDR45B    | -0.558538853 | 6.34E-07 |
| ENSG00000090975 | PITPNM2   | -1.130435881 | 6.35E-07 |
| ENSG00000079263 | SP140     | 1.246952671  | 6.36E-07 |
| ENSG00000089127 | OAS1      | 2.212336219  | 6.46E-07 |
| ENSG00000237276 | ANO7L1    | 1.779747225  | 6.51E-07 |
| ENSG00000155363 | MOV10     | 0.79261934   | 6.51E-07 |
| ENSG00000105639 | JAK3      | 0.821263537  | 6.59E-07 |
| ENSG00000013619 | MAMLD1    | -4.085532493 | 6.96E-07 |
| ENSG00000145016 | RUBCN     | 0.595392711  | 7.12E-07 |
| ENSG00000111907 | TPD52L1   | 1.840165917  | 7.37E-07 |
| ENSG00000156587 | UBE2L6    | 1.215580969  | 7.71E-07 |
| ENSG00000117226 | GBP3      | 1.100639307  | 7.78E-07 |
| ENSG00000174748 | RPL15     | -0.433326646 | 7.78E-07 |
| ENSG00000150907 | FOXO1     | -0.79279773  | 7.78E-07 |
| ENSG00000197111 | PCBP2     | -0.474091574 | 8.44E-07 |
| ENSG00000072858 | SIDT1     | -1.108238212 | 8.66E-07 |
| ENSG00000184441 |           | -1.00444378  | 8.66E-07 |
| ENSG00000007264 | MATK      | -2.898568619 | 8.87E-07 |
| ENSG00000152061 | RABGAP1L  | 0.880162684  | 9.09E-07 |
| ENSG00000152484 | USP12     | -0.780864659 | 9.26E-07 |
| ENSG00000137337 | MDC1      | -0.702141844 | 1.05E-06 |
| ENSG00000089057 | SLC23A2   | -0.743401657 | 1.05E-06 |
| ENSG00000153933 | DGKE      | -0.80495567  | 1.11E-06 |
| ENSG00000163961 | RNF168    | -0.776970575 | 1.14E-06 |
| ENSG00000099814 | CEP170B   | -2.880547134 | 1.18E-06 |

|                 |          |              |          |
|-----------------|----------|--------------|----------|
| ENSG00000103264 | FBXO31   | -0.65283109  | 1.18E-06 |
| ENSG00000198417 | MT1F     | 1.419087813  | 1.35E-06 |
| ENSG00000221963 | APOL6    | 1.075556893  | 1.36E-06 |
| ENSG00000108387 | Sep-04   | 1.519492957  | 1.39E-06 |
| ENSG00000188011 | RTP5     | -5.656952796 | 1.42E-06 |
| ENSG00000101596 | SMCHD1   | 0.715963375  | 1.65E-06 |
| ENSG00000156650 | KAT6B    | -0.636735769 | 1.80E-06 |
| ENSG00000111641 | NOP2     | -0.731968652 | 1.95E-06 |
| ENSG00000140332 | TLE3     | -0.914136936 | 1.99E-06 |
| ENSG00000137936 | BCAR3    | -2.532099701 | 2.01E-06 |
| ENSG00000116863 | ADPRHL2  | 0.892617688  | 2.07E-06 |
| ENSG00000122224 | LY9      | -1.747438413 | 2.17E-06 |
| ENSG00000117475 | BLZF1    | 0.679762449  | 2.34E-06 |
| ENSG00000136682 | CBWD2    | 0.630063435  | 2.40E-06 |
| ENSG00000135094 | SDS      | -2.9578259   | 2.74E-06 |
| ENSG00000135622 | SEMA4F   | 1.321107742  | 2.77E-06 |
| ENSG00000116663 | FBXO6    | 1.237564887  | 2.81E-06 |
| ENSG00000149313 | AASDHPPT | 0.756579925  | 2.81E-06 |
| ENSG00000115415 | STAT1    | 1.426331566  | 3.14E-06 |
| ENSG00000198087 | CD2AP    | 0.867196522  | 3.45E-06 |
| ENSG00000079616 | KIF22    | -0.656455595 | 3.46E-06 |
| ENSG00000156983 | BRPF1    | -0.573671399 | 3.47E-06 |
| ENSG00000152558 | TMEM123  | 0.925174701  | 3.47E-06 |
| ENSG00000182179 | UBA7     | 0.612332345  | 4.01E-06 |
| ENSG00000188315 | C3orf62  | -0.591170073 | 4.35E-06 |
| ENSG00000171604 | CXXC5    | -1.490211538 | 4.50E-06 |
| ENSG00000089157 | RPLP0    | -0.522383942 | 4.50E-06 |
| ENSG00000070961 | ATP2B1   | -1.55794677  | 4.64E-06 |
| ENSG00000185722 | ANKFY1   | 0.640516461  | 4.64E-06 |
| ENSG00000198604 | BAZ1A    | 0.487198546  | 4.67E-06 |
| ENSG00000117228 | GBP1     | 1.713005252  | 4.87E-06 |
| ENSG00000162407 | PLPP3    | -3.54686187  | 4.92E-06 |
| ENSG00000062598 | ELMO2    | 0.575344044  | 5.03E-06 |
| ENSG00000178685 | PARP10   | 1.188771447  | 5.16E-06 |
| ENSG00000136877 | FPGS     | -0.904542002 | 5.28E-06 |
| ENSG00000111371 | SLC38A1  | -1.052010974 | 5.88E-06 |
| ENSG00000067066 | SP100    | 0.654604751  | 6.07E-06 |
| ENSG00000021355 | SERPINB1 | 0.511822821  | 6.07E-06 |
| ENSG00000089094 | KDM2B    | -0.504498644 | 6.11E-06 |
| ENSG00000140280 | LYSMD2   | 0.789711493  | 7.29E-06 |
| ENSG00000170175 | CHRN1    | 1.014278816  | 7.61E-06 |
| ENSG00000165804 | ZNF219   | -1.496984008 | 7.76E-06 |
| ENSG00000100814 | CCNB1IP1 | -0.575396059 | 7.76E-06 |
| ENSG00000008083 | JARID2   | -1.103933263 | 7.95E-06 |
| ENSG00000141385 | AFG3L2   | -0.447760418 | 7.95E-06 |
| ENSG00000115155 | OTOF     | 3.857485425  | 7.98E-06 |
| ENSG00000239713 | APOBEC3G | 1.184218522  | 7.98E-06 |
| ENSG00000123609 | NMI      | 1.231034648  | 8.36E-06 |

|                 |            |              |          |
|-----------------|------------|--------------|----------|
| ENSG00000228106 |            | -1.183741944 | 8.42E-06 |
| ENSG00000115159 | GPD2       | 0.718650372  | 8.49E-06 |
| ENSG00000185880 | TRIM69     | 1.291070632  | 8.53E-06 |
| ENSG00000167680 | SEMA6B     | -4.661726901 | 9.16E-06 |
| ENSG00000065923 | SLC9A7     | -1.232417107 | 1.03E-05 |
| ENSG00000160271 | RALGDS     | -1.038228728 | 1.04E-05 |
| ENSG00000100600 | LGMN       | -2.040086501 | 1.05E-05 |
| ENSG00000040199 | PHLPP2     | -0.699169146 | 1.09E-05 |
| ENSG00000166527 | CLEC4D     | 0.977116827  | 1.14E-05 |
| ENSG00000087589 | CASS4      | -1.238973567 | 1.15E-05 |
| ENSG00000084112 | SSH1       | -0.658357856 | 1.15E-05 |
| ENSG00000167601 | AXL        | 2.291470244  | 1.18E-05 |
| ENSG00000168118 | RAB4A      | -0.420845252 | 1.21E-05 |
| ENSG00000164687 | FABP5      | -2.260390179 | 1.22E-05 |
| ENSG00000179840 | PIK3CD-AS1 | 1.535622504  | 1.23E-05 |
| ENSG00000168234 | TTC39C     | 0.668293223  | 1.23E-05 |
| ENSG00000196329 | GIMAP5     | 1.743179476  | 1.24E-05 |
| ENSG00000182378 | PLCXD1     | -1.31576293  | 1.24E-05 |
| ENSG00000179361 | ARID3B     | -0.817864248 | 1.26E-05 |
| ENSG00000179144 | GIMAP7     | 1.923890158  | 1.31E-05 |
| ENSG00000269951 |            | -1.54628417  | 1.32E-05 |
| ENSG00000213689 | TREX1      | 1.028890952  | 1.42E-05 |
| ENSG00000148516 | ZEB1       | -2.091137645 | 1.44E-05 |
| ENSG00000167747 | C19orf48   | -0.810855845 | 1.46E-05 |
| ENSG00000186480 | INSIG1     | -1.210473156 | 1.49E-05 |
| ENSG00000176102 | CSTF3      | 0.614702984  | 1.51E-05 |
| ENSG00000171316 | CHD7       | -1.114085896 | 1.57E-05 |
| ENSG00000167208 | SNX20      | 0.62475524   | 1.62E-05 |
| ENSG00000165943 | MOAP1      | -0.726591275 | 1.62E-05 |
| ENSG00000163319 | MRPS18C    | 0.779359451  | 1.62E-05 |
| ENSG00000174738 | NR1D2      | -1.272606588 | 1.67E-05 |
| ENSG00000169251 | NMD3       | -0.595299337 | 1.71E-05 |
| ENSG00000172053 | QARS       | -0.354545675 | 1.80E-05 |
| ENSG00000127586 | CHTF18     | -0.730284598 | 1.86E-05 |
| ENSG00000179044 | EXOC3L1    | 1.717437121  | 1.89E-05 |
| ENSG00000186567 | CEACAM19   | -1.267100062 | 1.89E-05 |
| ENSG00000183655 | KLHL25     | -1.382444036 | 1.90E-05 |
| ENSG00000204519 | ZNF551     | -0.875989431 | 1.95E-05 |
| ENSG00000107371 | EXOSC3     | 0.895054014  | 2.00E-05 |
| ENSG00000174444 | RPL4       | -0.440854929 | 2.00E-05 |
| ENSG00000168062 | BATF2      | 2.240757993  | 2.02E-05 |
| ENSG00000197121 | PGAP1      | 1.447110583  | 2.06E-05 |
| ENSG00000181045 | SLC26A11   | -1.166545948 | 2.06E-05 |
| ENSG00000141542 | RAB40B     | -1.022591809 | 2.09E-05 |
| ENSG00000106991 | ENG        | -1.122279696 | 2.15E-05 |
| ENSG00000106089 | STX1A      | -2.870610165 | 2.24E-05 |
| ENSG00000169100 | SLC25A6    | -0.436436931 | 2.25E-05 |
| ENSG00000149131 | SERPING1   | 2.288858944  | 2.25E-05 |

|                 |              |              |          |
|-----------------|--------------|--------------|----------|
| ENSG00000103942 | HOMER2       | -1.27813326  | 2.62E-05 |
| ENSG00000136874 | STX17        | 0.613744675  | 2.79E-05 |
| ENSG00000170989 | S1PR1        | -1.784781687 | 2.81E-05 |
| ENSG00000011566 | MAP4K3       | -1.132576152 | 2.84E-05 |
| ENSG00000244968 | LIFR-AS1     | 1.57107458   | 3.14E-05 |
| ENSG00000197771 | MCMBP        | 0.796348939  | 3.16E-05 |
| ENSG00000172345 | STARD5       | -1.389809437 | 3.16E-05 |
| ENSG00000142687 | KIAA0319L    | 0.626951341  | 3.28E-05 |
| ENSG00000163376 | KBTBD8       | -1.344776184 | 3.28E-05 |
| ENSG00000090971 | NAT14        | -0.900750389 | 3.35E-05 |
| ENSG00000141577 | CEP131       | -0.630148552 | 3.46E-05 |
| ENSG00000100316 | RPL3         | -0.458586504 | 3.49E-05 |
| ENSG00000013374 | NUB1         | 0.718228941  | 3.51E-05 |
| ENSG00000250575 |              | -1.025266105 | 3.54E-05 |
| ENSG00000187912 | CLEC17A      | -1.71599741  | 3.54E-05 |
| ENSG00000174238 | PITPNA       | -0.629925673 | 3.58E-05 |
| ENSG00000278948 |              | -0.807242396 | 3.78E-05 |
| ENSG00000081913 | PHLPP1       | -0.784347179 | 3.81E-05 |
| ENSG00000115594 | IL1R1        | -2.656777092 | 3.86E-05 |
| ENSG00000229677 |              | 1.466942666  | 3.87E-05 |
| ENSG00000176903 | PNMA1        | -0.856810624 | 4.04E-05 |
| ENSG00000047634 | SCML1        | -1.254746261 | 4.11E-05 |
| ENSG00000136960 | ENPP2        | 1.823721083  | 4.19E-05 |
| ENSG00000263528 | IKBKE        | 0.760962027  | 4.19E-05 |
| ENSG00000041357 | PSMA4        | 0.626588215  | 4.21E-05 |
| ENSG00000168310 | IRF2         | 0.893810835  | 4.22E-05 |
| ENSG00000137094 | DNAJB5       | -1.441911986 | 4.27E-05 |
| ENSG00000075275 | CELSR1       | -2.480099685 | 4.27E-05 |
| ENSG00000181873 | IBA57        | -1.112273742 | 4.34E-05 |
| ENSG00000133657 | ATP13A3      | -1.151906378 | 4.34E-05 |
| ENSG00000133574 | GIMAP4       | 1.73080655   | 4.34E-05 |
| ENSG00000004660 | CAMKK1       | -1.252767227 | 4.34E-05 |
| ENSG00000278133 |              | -0.586839078 | 4.45E-05 |
| ENSG00000179639 | FCER1A       | -3.168083362 | 4.48E-05 |
| ENSG00000257167 | TMPO-AS1     | 1.357880418  | 4.79E-05 |
| ENSG00000260314 | MRC1         | -1.867118896 | 4.82E-05 |
| ENSG00000213553 | RPLP0P6      | -0.567495616 | 4.92E-05 |
| ENSG00000009844 | VTA1         | 0.649836472  | 4.93E-05 |
| ENSG00000120802 | TMPO         | 0.764181361  | 4.95E-05 |
| ENSG00000108984 | MAP2K6       | 1.100308846  | 4.95E-05 |
| ENSG00000130303 | BST2         | 0.987622762  | 5.00E-05 |
| ENSG00000185477 | GPRIN3       | -1.284802201 | 5.08E-05 |
| ENSG00000125148 | MT2A         | 1.454438015  | 5.08E-05 |
| ENSG00000234771 | SLC25A25-AS1 | -0.705097171 | 5.29E-05 |
| ENSG00000234076 | TPRG1-AS1    | 1.581286793  | 5.35E-05 |
| ENSG00000077782 | FGFR1        | -1.282063118 | 5.37E-05 |
| ENSG00000153107 | ANAPC1       | -0.397941423 | 5.57E-05 |
| ENSG00000011478 | QPCTL        | -0.777385003 | 5.63E-05 |

|                 |            |              |             |
|-----------------|------------|--------------|-------------|
| ENSG0000055147  | FAM114A2   | 0.665563046  | 5.78E-05    |
| ENSG00000105855 | ITGB8      | -2.718925735 | 5.93E-05    |
| ENSG00000198133 | TMEM229B   | 1.15327429   | 5.93E-05    |
| ENSG00000169871 | TRIM56     | 0.775608291  | 6.07E-05    |
| ENSG00000010030 | ETV7       | 2.594473037  | 6.15E-05    |
| ENSG00000138050 | THUMPD2    | -0.771335101 | 6.25E-05    |
| ENSG00000025770 | NCAPH2     | -0.726976069 | 6.41E-05    |
| ENSG00000087502 | ERGIC2     | 0.625494534  | 6.65E-05    |
| ENSG00000178562 | CD28       | -1.954441242 | 6.71E-05    |
| ENSG00000161996 | WDR90      | -0.852152073 | 6.87E-05    |
| ENSG00000160408 | ST6GALNAC6 | -0.710024092 | 7.68E-05    |
| ENSG00000279700 |            | -1.454026647 | 7.68E-05    |
| ENSG00000121858 | TNFSF10    | 1.749419492  | 7.72E-05    |
| ENSG00000151445 | VIPAS39    | 0.699011261  | 7.72E-05    |
| ENSG00000114127 | XRN1       | 0.496051553  | 7.74E-05    |
| ENSG00000118689 | FOXO3      | -0.901663426 | 7.81E-05    |
| ENSG00000172175 | MALT1      | -0.580820234 | 7.81E-05    |
| ENSG00000100083 | GGA1       | -0.561239318 | 7.93E-05    |
| ENSG00000112576 | CCND3      | 0.814158484  | 7.96E-05    |
| ENSG00000173848 | NET1       | -1.562362603 | 8.11E-05    |
| ENSG00000149798 | CDC42EP2   | 1.156420117  | 8.60E-05    |
| ENSG00000121486 | TRMT1L     | 0.829774148  | 8.74E-05    |
| ENSG00000178988 | MRFAP1L1   | 0.746308646  | 9.32E-05    |
| ENSG00000214193 | SH3D21     | -1.422035038 | 9.54E-05    |
| ENSG00000165322 | ARHGAP12   | -0.65845662  | 9.72E-05    |
| ENSG00000156030 | ELMSAN1    | -0.64073141  | 9.86E-05    |
| ENSG00000228794 | LINC01128  | -0.868981877 | 9.93E-05    |
| ENSG00000180354 | MTURN      | -0.774395092 | 0.000100761 |
| ENSG00000104824 | HNRNPL     | -0.428226405 | 0.000102601 |
| ENSG00000123240 | OPTN       | 0.980441457  | 0.000103815 |
| ENSG00000091844 | RGS17      | -1.163278233 | 0.000106195 |
| ENSG00000135972 | MRPS9      | 0.547856247  | 0.000106573 |
| ENSG00000119392 | GLE1       | 0.463023511  | 0.000110155 |
| ENSG00000177294 | FBXO39     | 2.166020902  | 0.000111065 |
| ENSG00000167962 | ZNF598     | -0.383260068 | 0.000111582 |
| ENSG00000121743 | GJA3       | -4.663854813 | 0.000112057 |
| ENSG00000100084 | HIRA       | 0.536134223  | 0.000115463 |
| ENSG00000126804 | ZBTB1      | -0.634843883 | 0.000116396 |
| ENSG00000263465 | SRSF8      | -0.548968652 | 0.000120269 |
| ENSG00000204590 | GNL1       | -0.656763835 | 0.000124912 |
| ENSG00000188428 | BLOC1S5    | 0.713600295  | 0.00012625  |
| ENSG00000089009 | RPL6       | -0.385750505 | 0.000127094 |
| ENSG00000141664 | ZCCHC2     | 0.798179934  | 0.000129966 |
| ENSG00000137409 | MTCH1      | -0.564803158 | 0.00013145  |
| ENSG00000169490 | TM2D2      | 0.613147499  | 0.00013145  |
| ENSG00000128394 | APOBEC3F   | 1.001475441  | 0.000138154 |
| ENSG00000235374 | SSR4P1     | 1.152551738  | 0.000140558 |
| ENSG00000137767 | SQRDL      | 0.635331095  | 0.000142421 |



|                 |          |              |             |
|-----------------|----------|--------------|-------------|
| ENSG0000010165  | METTL13  | 1.146182024  | 0.000142564 |
| ENSG00000157693 | TMEM268  | 0.533761546  | 0.000143969 |
| ENSG00000128513 | POT1     | 0.652853904  | 0.000144108 |
| ENSG00000110435 | PDHX     | 0.510902232  | 0.000145327 |
| ENSG00000153207 | AHCTF1   | -0.955919729 | 0.000146229 |
| ENSG00000168092 | PAFAH1B2 | -0.568709913 | 0.000146229 |
| ENSG00000186395 | KRT10    | -0.601294301 | 0.000146229 |
| ENSG00000142039 | CCDC97   | 0.547267037  | 0.000151973 |
| ENSG00000109046 | WSB1     | 0.641472881  | 0.000153219 |
| ENSG00000153914 | SREK1    | -0.602385998 | 0.000154176 |
| ENSG00000100353 | EIF3D    | -0.275762782 | 0.000154477 |
| ENSG00000169016 | E2F6     | -0.612782077 | 0.000155566 |
| ENSG00000162654 | GBP4     | 1.127807025  | 0.000158319 |
| ENSG00000172366 | MCRIP2   | -0.760076904 | 0.000160855 |
| ENSG00000221955 | SLC12A8  | 1.163099192  | 0.000161946 |
| ENSG00000136235 | GPNMB    | -2.321371038 | 0.000161946 |
| ENSG00000166750 | SLFN5    | 1.376716628  | 0.000164864 |
| ENSG00000248124 | RRN3P1   | -0.732887093 | 0.000165366 |
| ENSG00000136897 | MRPL50   | 0.748939508  | 0.000166417 |
| ENSG00000158042 | MRPL17   | 0.948546956  | 0.000166417 |
| ENSG00000189091 | SF3B3    | 0.515032226  | 0.000166417 |
| ENSG00000229638 | RPL4P4   | -0.525682406 | 0.00017015  |
| ENSG00000107742 | SPOCK2   | -1.575424776 | 0.000173606 |
| ENSG00000008130 | NADK     | 0.662553271  | 0.000174577 |
| ENSG00000105699 | LSR      | -2.709226241 | 0.000174577 |
| ENSG00000229473 | RGS17P1  | -1.286837968 | 0.000175214 |
| ENSG00000055483 | USP36    | -1.159074028 | 0.000177215 |
| ENSG00000068394 | GPKOW    | 0.6496998    | 0.000177994 |
| ENSG00000188636 | LDOC1L   | -0.806442776 | 0.000190103 |
| ENSG00000147180 | ZNF711   | -2.157212175 | 0.000190296 |
| ENSG00000147604 | RPL7     | -0.446282287 | 0.000190296 |
| ENSG00000079313 | REXO1    | -0.487040087 | 0.000194593 |
| ENSG00000273015 |          | -0.520152557 | 0.000195816 |
| ENSG00000204264 | PSMB8    | 0.546565892  | 0.000196593 |
| ENSG00000165806 | CASP7    | 0.73489208   | 0.000197413 |
| ENSG00000275835 | TUBGCP5  | -0.647677587 | 0.000198525 |
| ENSG00000167394 | ZNF668   | -0.754453899 | 0.000203653 |
| ENSG00000188313 | PLSCR1   | 1.115187823  | 0.000204169 |
| ENSG00000152404 | CWF19L2  | 0.595188127  | 0.000204169 |
| ENSG00000007350 | TKTL1    | -2.676305808 | 0.000204704 |
| ENSG00000154451 | GBP5     | 1.209108397  | 0.000209658 |
| ENSG00000008294 | SPAG9    | -0.60974498  | 0.000210192 |
| ENSG00000174243 | DDX23    | 0.582955734  | 0.000211991 |
| ENSG00000198034 | RPS4X    | -0.412374986 | 0.000223443 |
| ENSG00000087460 | GNAS     | -0.275284087 | 0.000233998 |
| ENSG00000173575 | CHD2     | -0.608070916 | 0.00023434  |
| ENSG00000100596 | SPTLC2   | 0.750866178  | 0.000237427 |
| ENSG00000170779 | CDCA4    | -1.196210439 | 0.000238064 |

|                 |             |              |             |
|-----------------|-------------|--------------|-------------|
| ENSG00000150401 | DCUN1D2     | -0.455693008 | 0.000245156 |
| ENSG00000225614 | ZNF469      | -1.540774895 | 0.000245156 |
| ENSG00000116251 | RPL22       | -0.413756479 | 0.00025144  |
| ENSG00000135486 | HNRNPA1     | -0.372166192 | 0.000253765 |
| ENSG00000117479 | SLC19A2     | -1.170965105 | 0.000263044 |
| ENSG00000260910 | LINC00565   | -2.346547811 | 0.000265889 |
| ENSG00000244733 |             | -0.970225992 | 0.000267499 |
| ENSG00000006327 | TNFRSF12A   | -2.321590777 | 0.000275346 |
| ENSG00000175061 | LRRC75A-AS1 | -0.44562655  | 0.000278005 |
| ENSG00000240053 | LY6G5B      | -0.719395311 | 0.000278868 |
| ENSG00000267745 |             | 0.857705384  | 0.000281583 |
| ENSG00000106366 | SERPINE1    | -2.72667949  | 0.000284636 |
| ENSG00000116983 | HPCAL4      | -2.407025788 | 0.00028785  |
| ENSG00000065150 | IPO5        | -0.44573155  | 0.000299975 |
| ENSG00000121671 | CRY2        | -0.800736661 | 0.000303268 |
| ENSG00000170633 | RNF34       | 0.719798696  | 0.000304054 |
| ENSG00000159131 | GART        | 0.7919839    | 0.000317404 |
| ENSG00000225492 | GBP1P1      | 1.959963119  | 0.000317887 |
| ENSG00000186020 | ZNF529      | -0.728377255 | 0.000317935 |
| ENSG00000088827 | SIGLEC1     | 3.281898024  | 0.000319255 |
| ENSG00000125812 | GZF1        | -1.008801698 | 0.000323248 |
| ENSG00000188404 | SELL        | 0.957574985  | 0.000327896 |
| ENSG00000261526 |             | -0.964661291 | 0.000331671 |
| ENSG00000071575 | TRIB2       | 0.972465536  | 0.000333713 |
| ENSG00000242125 | SNHG3       | -0.591404545 | 0.000340212 |
| ENSG00000133313 | CNDP2       | 0.530637433  | 0.000342137 |
| ENSG00000164002 | EXO5        | 0.645052463  | 0.000349446 |
| ENSG00000168040 | FADD        | 0.746274455  | 0.000349446 |
| ENSG00000183426 | NP1PA1      | -0.68477835  | 0.000349739 |
| ENSG00000169635 | HIC2        | -0.771176053 | 0.000351248 |
| ENSG00000075089 | ACTR6       | 0.56638928   | 0.00035641  |
| ENSG00000126767 | ELK1        | -0.465679119 | 0.000360931 |
| ENSG00000186891 | TNFRSF18    | -3.215125936 | 0.000364104 |
| ENSG00000179833 | SERTAD2     | -0.580610144 | 0.000364104 |
| ENSG00000026103 | FAS         | 1.089690817  | 0.000365387 |
| ENSG00000113716 | HMGXB3      | -0.503814686 | 0.000371154 |
| ENSG00000165934 | CPSF2       | 0.643536001  | 0.00037176  |
| ENSG00000185163 | DDX51       | -0.446355609 | 0.000376043 |
| ENSG00000134001 | EIF2S1      | 0.654161104  | 0.000377176 |
| ENSG00000072364 | AFF4        | -0.587180662 | 0.000386373 |
| ENSG00000150637 | CD226       | -2.062766121 | 0.000386373 |
| ENSG00000069667 | RORA        | -2.062575504 | 0.000387295 |
| ENSG00000184613 | NELL2       | -2.206263048 | 0.000398476 |
| ENSG00000132661 | NXT1        | -0.76797271  | 0.000398476 |
| ENSG00000146476 | ARMT1       | 0.989242923  | 0.000401662 |
| ENSG00000110060 | PUS3        | 0.687919163  | 0.000403947 |
| ENSG00000072415 | MPP5        | -0.662558609 | 0.000406205 |
| ENSG00000186260 | MKL2        | -0.599016826 | 0.000406205 |

|                 |             |              |             |
|-----------------|-------------|--------------|-------------|
| ENSG0000024862  | CCDC28A     | 0.516838403  | 0.000407338 |
| ENSG00000197536 | C5orf56     | 0.952821793  | 0.00041531  |
| ENSG00000183742 | MACC1       | -2.363135473 | 0.00041603  |
| ENSG00000266947 |             | 1.070342082  | 0.00041603  |
| ENSG00000008256 | CYTH3       | -0.839798658 | 0.000423775 |
| ENSG00000102401 | ARMCX3      | 0.627426885  | 0.000429185 |
| ENSG00000099331 | MYO9B       | -0.431504685 | 0.000429185 |
| ENSG00000125355 | TMEM255A    | 2.438326014  | 0.000435395 |
| ENSG00000095585 | BLNK        | 1.473622657  | 0.000446772 |
| ENSG00000110871 | COQ5        | 0.679871355  | 0.000447428 |
| ENSG00000120265 | PCMT1       | 0.721502669  | 0.00045417  |
| ENSG00000107651 | SEC23IP     | 0.632687892  | 0.00045417  |
| ENSG00000267278 | MAP3K14-AS1 | -1.20825475  | 0.00045417  |
| ENSG00000099622 | CIRBP       | -0.369616515 | 0.000457678 |
| ENSG00000116604 | MEF2D       | -0.888174324 | 0.000457805 |
| ENSG00000124357 | NAGK        | 0.636272269  | 0.000467215 |
| ENSG00000184260 | HIST2H2AC   | 0.834364766  | 0.000468306 |
| ENSG00000140092 | FBLN5       | -2.619756347 | 0.000468306 |
| ENSG00000112130 | RNF8        | 0.636794264  | 0.000469517 |
| ENSG00000127074 | RGS13       | -3.648287451 | 0.000485487 |
| ENSG00000137154 | RPS6        | -0.400052554 | 0.000489491 |
| ENSG00000166908 | PIP4K2C     | 0.553617992  | 0.000492224 |
| ENSG00000267787 |             | 0.673766048  | 0.000494224 |
| ENSG00000168275 | COA6        | 0.743198224  | 0.000496937 |
| ENSG00000262001 | DLGAP1-AS2  | -1.25376464  | 0.000504685 |
| ENSG00000059769 | DNAJC25     | -0.769789169 | 0.000507849 |
| ENSG00000089220 | PEBP1       | -0.482333891 | 0.000510609 |
| ENSG00000181350 | LRRC75A     | -1.098532463 | 0.000515296 |
| ENSG00000121931 | LRIF1       | 1.017077612  | 0.000516421 |
| ENSG00000058799 | YIPF1       | 0.494505475  | 0.000519794 |
| ENSG00000162461 | SLC25A34    | -1.147552355 | 0.000521877 |
| ENSG00000158290 | CUL4B       | 0.434800778  | 0.00052673  |
| ENSG00000168758 | SEMA4C      | -1.32914342  | 0.000534554 |
| ENSG00000134278 | SPIRE1      | -1.368853735 | 0.000534554 |
| ENSG00000129515 | SNX6        | 0.446253597  | 0.000534651 |
| ENSG00000119787 | ATL2        | -0.549171367 | 0.000536356 |
| ENSG00000102699 | PARP4       | 0.66138094   | 0.000536356 |
| ENSG00000171988 | JMJD1C      | -0.755357307 | 0.000542702 |
| ENSG00000141506 | PIK3R5      | -0.636028191 | 0.000546475 |
| ENSG00000258839 | MC1R        | -1.121386423 | 0.000552469 |
| ENSG00000105974 | CAV1        | -4.706892355 | 0.000555806 |
| ENSG00000107951 | MTPAP       | -0.443357352 | 0.000567752 |
| ENSG00000185972 | CCIN        | -1.2442068   | 0.000581306 |
| ENSG00000085563 | ABCB1       | -2.9476247   | 0.000583079 |
| ENSG00000162510 | MATN1       | -3.227287704 | 0.000583629 |
| ENSG00000175573 | C11orf68    | 0.735371849  | 0.000587954 |
| ENSG00000125900 | SIRPD       | 0.979969338  | 0.0005962   |
| ENSG00000135636 | DYSF        | 1.366026602  | 0.000602827 |

|                 |             |              |             |
|-----------------|-------------|--------------|-------------|
| ENSG00000129465 | RIPK3       | 0.645888137  | 0.000607302 |
| ENSG00000183955 | KMT5A       | -0.487024526 | 0.000630381 |
| ENSG00000172123 | SLFN12      | 0.828206361  | 0.000641103 |
| ENSG00000123908 | AGO2        | -0.56674282  | 0.00064834  |
| ENSG00000140563 | MCTP2       | 0.848449008  | 0.000652678 |
| ENSG00000139354 | GAS2L3      | -2.020515813 | 0.000661021 |
| ENSG00000158321 | AUTS2       | -1.493841901 | 0.000664983 |
| ENSG00000267547 |             | 1.142301901  | 0.000664983 |
| ENSG00000084733 | RAB10       | 0.820251111  | 0.00066749  |
| ENSG00000168913 | ENHO        | -1.328424093 | 0.00067624  |
| ENSG00000196358 | NTNG2       | 0.948743615  | 0.000679974 |
| ENSG00000050405 | LIMA1       | 1.125777182  | 0.000680458 |
| ENSG00000145425 | RPS3A       | -0.457724792 | 0.000681416 |
| ENSG00000142961 | MOB3C       | 0.645737283  | 0.000698753 |
| ENSG00000133059 | DSTYK       | -0.450296198 | 0.000704365 |
| ENSG00000055609 | KMT2C       | -0.500068285 | 0.000704365 |
| ENSG00000100744 | GSKIP       | 0.573847976  | 0.000707955 |
| ENSG00000146535 | GNA12       | -0.683447656 | 0.000708654 |
| ENSG00000110046 | ATG2A       | -0.893817214 | 0.000708654 |
| ENSG00000162804 | SNED1       | -1.375976858 | 0.000710093 |
| ENSG00000123737 | EXOSC9      | 0.516300174  | 0.000710093 |
| ENSG00000196814 | MVB12B      | 0.849846097  | 0.000710093 |
| ENSG00000259004 |             | 0.976892706  | 0.000717706 |
| ENSG00000124193 | SRSF6       | -0.420374983 | 0.000729468 |
| ENSG00000276672 |             | -1.210138361 | 0.000730102 |
| ENSG00000227008 |             | -0.709150465 | 0.000736821 |
| ENSG00000152784 | PRDM8       | -1.631393144 | 0.00074195  |
| ENSG00000173083 | HPSE        | 0.837529447  | 0.000752794 |
| ENSG00000111615 | KRR1        | -0.647860608 | 0.000755266 |
| ENSG00000130489 | SCO2        | 1.0201548    | 0.000755266 |
| ENSG00000067334 | DNTTIP2     | -0.641553182 | 0.000756395 |
| ENSG00000115368 | WDR75       | -0.409548566 | 0.00076425  |
| ENSG00000087095 | NLK         | 0.514866952  | 0.000765046 |
| ENSG00000110721 | CHKA        | -1.108500102 | 0.000771349 |
| ENSG00000206573 | THUMPD3-AS1 | -0.491845102 | 0.000778481 |
| ENSG00000241127 | YAE1D1      | 1.136148644  | 0.000778481 |
| ENSG00000246731 |             | 1.057725225  | 0.000779455 |
| ENSG00000153201 | RANBP2      | -0.903719437 | 0.000816183 |
| ENSG00000177613 | CSTF2T      | 0.522047078  | 0.00083215  |
| ENSG00000260676 | LINC01541   | 1.195670001  | 0.000835704 |
| ENSG00000120217 | CD274       | 1.097828593  | 0.000835806 |
| ENSG00000271646 |             | 0.906616243  | 0.000837795 |
| ENSG00000012983 | MAP4K5      | -0.463227343 | 0.000840541 |
| ENSG00000165138 | ANKS6       | -0.988007477 | 0.000842167 |
| ENSG00000006062 | MAP3K14     | -0.410631203 | 0.000842167 |
| ENSG00000152904 | GGPS1       | 0.706719827  | 0.000848915 |
| ENSG00000224078 | SNHG14      | -0.704628226 | 0.000848915 |
| ENSG00000151136 | BTBD11      | -0.881300506 | 0.000848991 |

|                 |           |              |             |
|-----------------|-----------|--------------|-------------|
| ENSG00000108256 | NUFIP2    | -0.416079355 | 0.000848991 |
| ENSG00000130024 | PHF10     | -0.613615016 | 0.000854446 |
| ENSG00000139289 | PHLDA1    | -2.221942292 | 0.000855753 |
| ENSG00000155827 | RNF20     | 0.669528016  | 0.000859276 |
| ENSG00000180917 | CMTR2     | 0.760476344  | 0.000859616 |
| ENSG00000109099 | PMP22     | -1.838299258 | 0.000859616 |
| ENSG00000152256 | PDK1      | -0.693049817 | 0.000866111 |
| ENSG00000137970 | RPL7P9    | -0.448387426 | 0.000871371 |
| ENSG00000071242 | RPS6KA2   | -0.882373548 | 0.000871371 |
| ENSG00000071462 | WBSCR22   | -0.455600095 | 0.000874122 |
| ENSG00000205765 | C5orf51   | 0.706774384  | 0.000877395 |
| ENSG00000151065 | DCP1B     | 0.763548342  | 0.000880076 |
| ENSG00000267102 |           | 0.902218707  | 0.000881033 |
| ENSG00000133121 | STARD13   | -1.892183647 | 0.000881427 |
| ENSG00000105173 | CCNE1     | -1.230467594 | 0.000881915 |
| ENSG00000180422 | LINC00304 | -1.495484368 | 0.000891161 |
| ENSG00000125520 | SLC2A4RG  | -0.475698097 | 0.000893102 |
| ENSG00000107282 | APBA1     | -1.313081527 | 0.000896928 |
| ENSG00000069956 | MAPK6     | -1.056812301 | 0.000900227 |
| ENSG00000188785 | ZNF548    | -0.584028283 | 0.000916573 |
| ENSG00000166484 | MAPK7     | -0.608233711 | 0.000917422 |
| ENSG00000145365 | TIFA      | 1.010469623  | 0.000918278 |
| ENSG00000151692 | RNF144A   | 0.860448686  | 0.000920821 |
| ENSG00000153767 | GTF2E1    | 0.787214863  | 0.000920821 |
| ENSG00000213203 | GIMAP1    | 1.271800597  | 0.000924743 |
| ENSG00000136158 | SPRY2     | -2.695449735 | 0.000924743 |
| ENSG00000264247 | LINC00909 | 0.582296252  | 0.000924743 |
| ENSG00000005022 | SLC25A5   | -0.473894021 | 0.000927634 |
| ENSG00000123095 | BHLHE41   | -3.018744279 | 0.000927634 |
| ENSG00000125149 | C16orf70  | -0.324403793 | 0.000936368 |
| ENSG00000114126 | TFDP2     | -0.51983228  | 0.000951987 |
| ENSG00000131398 | KCNC3     | -0.907101678 | 0.000962088 |
| ENSG00000250959 | GLUD1P3   | -0.679864207 | 0.000971482 |
| ENSG00000170275 | CRTAP     | -0.401965428 | 0.000986032 |
| ENSG00000019144 | PHLDB1    | -1.233928049 | 0.000987994 |
| ENSG00000197272 | IL27      | 1.517297463  | 0.000991351 |
| ENSG00000217128 | FNIP1     | -0.729409442 | 0.000993379 |
| ENSG00000219665 |           | -0.556028562 | 0.000995326 |
| ENSG00000121022 | COPS5     | 0.443743237  | 0.001005794 |
| ENSG00000104133 | SPG11     | 0.476739099  | 0.00100747  |
| ENSG00000140391 | TSPAN3    | -0.683726778 | 0.00100747  |
| ENSG00000088826 | SMOX      | -1.89968936  | 0.001009907 |
| ENSG00000146963 | LUC7L2    | -0.543136035 | 0.001012891 |
| ENSG00000135469 | COQ10A    | -0.688085788 | 0.001012891 |
| ENSG00000257093 | KIAA1147  | -0.54972848  | 0.00101516  |
| ENSG00000123562 | MORF4L2   | -0.439129765 | 0.00101735  |
| ENSG00000171049 | FPR2      | 1.452303042  | 0.001027092 |
| ENSG00000100422 | CERK      | -0.445472715 | 0.001027092 |

|                 |           |              |             |
|-----------------|-----------|--------------|-------------|
| ENSG00000197279 | ZNF165    | -1.761980415 | 0.001031878 |
| ENSG00000111716 | LDHB      | -0.477823687 | 0.001047689 |
| ENSG00000116786 | PLEKHM2   | -0.60073958  | 0.00105791  |
| ENSG00000164933 | SLC25A32  | -0.488959153 | 0.001058285 |
| ENSG00000133103 | COG6      | 0.505468791  | 0.001064513 |
| ENSG00000101213 | PTK6      | 0.930949624  | 0.001076405 |
| ENSG00000197561 | ELANE     | 1.376350969  | 0.001076405 |
| ENSG00000135297 | MTO1      | 0.581332808  | 0.001077131 |
| ENSG00000163811 | WDR43     | -0.539315413 | 0.00108048  |
| ENSG00000166886 | NAB2      | -1.530499477 | 0.001081394 |
| ENSG00000070444 | MNT       | -0.675865847 | 0.001091473 |
| ENSG00000169439 | SDC2      | -4.259772633 | 0.001093429 |
| ENSG00000158669 | GPAT4     | -0.339264694 | 0.001094771 |
| ENSG00000250182 | EEF1A1P13 | -0.628232724 | 0.001105663 |
| ENSG00000162517 | PEF1      | 0.425393853  | 0.001109924 |
| ENSG00000157500 | APPL1     | 0.425634044  | 0.001109924 |
| ENSG00000129691 | ASH2L     | 0.536818735  | 0.001109924 |
| ENSG00000178202 | KDEL2     | 0.762721399  | 0.001109924 |
| ENSG00000125826 | RBCK1     | 0.615426804  | 0.001109924 |
| ENSG00000105135 | ILVBL     | -0.587168709 | 0.001109924 |
| ENSG00000124103 | FAM209A   | -1.030997425 | 0.00111274  |
| ENSG00000174080 | CTSF      | -1.048313878 | 0.0011172   |
| ENSG00000128335 | APOL2     | 0.856787768  | 0.0011172   |
| ENSG00000064961 | HMG20B    | -0.47487092  | 0.001120428 |
| ENSG00000182372 | CLN8      | -0.658905984 | 0.001121766 |
| ENSG00000075391 | RASAL2    | -1.192013497 | 0.001127232 |
| ENSG00000116883 |           | -1.511997834 | 0.001134121 |
| ENSG00000007944 | MYLIP     | -0.809367191 | 0.00113701  |
| ENSG00000070756 | PABPC1    | -0.377539068 | 0.001144377 |
| ENSG00000152147 | GEMIN6    | 0.90137077   | 0.001158083 |
| ENSG00000143322 | ABL2      | -0.508554195 | 0.001163089 |
| ENSG00000132953 | XPO4      | -0.383135443 | 0.001163089 |
| ENSG00000117394 | SLC2A1    | -0.761848025 | 0.001181968 |
| ENSG00000156535 | CD109     | -1.822655014 | 0.001183654 |
| ENSG00000119714 | GPR68     | -1.685719913 | 0.001184792 |
| ENSG00000163166 | IWS1      | 0.407905441  | 0.001185303 |
| ENSG00000163464 | CXCR1     | 1.854012177  | 0.001189675 |
| ENSG00000159921 | GNE       | -0.43330716  | 0.001204356 |
| ENSG00000143772 | ITPKB     | -0.432049661 | 0.001206639 |
| ENSG00000114423 | CBLB      | -0.570091374 | 0.00121441  |
| ENSG00000197343 | ZNF655    | -0.353369609 | 0.001241471 |
| ENSG00000147140 | NONO      | -0.232742232 | 0.001243151 |
| ENSG00000114982 | KANSL3    | -0.371761758 | 0.001245306 |
| ENSG00000160789 | LMNA      | -1.819950417 | 0.001264951 |
| ENSG00000022267 | FHL1      | -1.305068946 | 0.001264951 |
| ENSG00000010404 | IDS       | -0.393210738 | 0.001264951 |
| ENSG00000244165 | P2RY11    | -0.768019747 | 0.001272029 |
| ENSG00000272367 |           | -1.03514018  | 0.001285361 |

|                 |            |              |             |
|-----------------|------------|--------------|-------------|
| ENSG00000175352 | NRIP3      | -2.207187446 | 0.001290978 |
| ENSG00000113312 | TTC1       | 0.547392732  | 0.001293233 |
| ENSG00000059691 | GATB       | 0.593336028  | 0.001298333 |
| ENSG00000143622 | RIT1       | -0.577800748 | 0.001298806 |
| ENSG00000186468 | RPS23      | -0.386259313 | 0.001306387 |
| ENSG00000099204 | ABLIM1     | -1.431707243 | 0.001315578 |
| ENSG00000166582 | CENPV      | -1.192382512 | 0.001315578 |
| ENSG00000073969 | NSF        | 0.388039439  | 0.001315578 |
| ENSG00000104814 | MAP4K1     | -0.550798338 | 0.001333933 |
| ENSG00000154642 | C21orf91   | 0.626782529  | 0.001333933 |
| ENSG00000105793 | GTPBP10    | 0.452614785  | 0.001336344 |
| ENSG00000165898 | ISCA2      | 0.618824577  | 0.001343971 |
| ENSG00000112146 | FBXO9      | 0.453498164  | 0.001360656 |
| ENSG00000170542 | SERPINB9   | 0.724667001  | 0.001361511 |
| ENSG00000101187 | SLCO4A1    | -2.720257568 | 0.001361735 |
| ENSG00000166123 | GPT2       | 1.011548813  | 0.001365393 |
| ENSG00000205846 | CLEC6A     | 1.085465767  | 0.00136704  |
| ENSG00000082516 | GEMIN5     | 0.685484511  | 0.001370312 |
| ENSG00000181467 | RAP2B      | -0.630428263 | 0.001373212 |
| ENSG00000120860 | CCDC53     | 0.604891082  | 0.001373212 |
| ENSG00000180747 | SMG1P3     | -0.743595809 | 0.001373212 |
| ENSG00000197566 | ZNF624     | 0.803137893  | 0.001373212 |
| ENSG00000159228 | CBR1       | 1.002745593  | 0.001376735 |
| ENSG00000266053 | NDUFV2-AS1 | -0.973932965 | 0.001381816 |
| ENSG00000158373 | HIST1H2BD  | 1.100422121  | 0.001383957 |
| ENSG00000204619 | PPP1R11    | 0.433403251  | 0.001383957 |
| ENSG00000119383 | PTPA       | 0.527811388  | 0.001383957 |
| ENSG00000133884 | DPF2       | 0.47490156   | 0.001383957 |
| ENSG00000166579 | NDEL1      | -0.738023823 | 0.001383957 |
| ENSG00000173065 | FAM222B    | -0.522863845 | 0.001402045 |
| ENSG00000120833 | SOCS2      | -2.019377725 | 0.001425221 |
| ENSG00000121060 | TRIM25     | 0.618261981  | 0.001431688 |
| ENSG00000173145 | NOC3L      | 0.639078549  | 0.00143334  |
| ENSG00000232472 | EEF1B2P3   | -0.5992394   | 0.001434122 |
| ENSG00000135148 | TRAFD1     | 0.869601981  | 0.001438844 |
| ENSG00000272899 |            | -1.519246156 | 0.001448549 |
| ENSG00000205981 | DNAJC19    | 0.569055062  | 0.00145506  |
| ENSG00000197713 | RPE        | 0.913021929  | 0.001485688 |
| ENSG00000181284 | TMEM102    | 0.878394958  | 0.001487092 |
| ENSG00000237550 | RPL9P9     | -0.44735338  | 0.001487868 |
| ENSG00000138375 | SMARCAL1   | 0.634022228  | 0.001494783 |
| ENSG00000163050 | COQ8A      | -0.398073839 | 0.001509736 |
| ENSG00000144218 | AFF3       | -0.904581633 | 0.001518891 |
| ENSG00000275111 | ZNF2       | 1.256951591  | 0.001522456 |
| ENSG00000272888 | LINC01578  | -0.549277646 | 0.001522703 |
| ENSG00000148840 | PPRC1      | -0.520390533 | 0.001526429 |
| ENSG00000168961 | LGALS9     | 0.818247253  | 0.001526429 |
| ENSG00000137309 | HMGA1      | -0.930714698 | 0.001526434 |

|                 |           |              |             |
|-----------------|-----------|--------------|-------------|
| ENSG00000159479 | MED8      | 0.514087846  | 0.001539389 |
| ENSG00000239305 | RNF103    | -0.851279568 | 0.001539389 |
| ENSG00000154065 | ANKRD29   | -1.95715992  | 0.001549441 |
| ENSG00000151612 | ZNF827    | -2.253591244 | 0.00154998  |
| ENSG00000178409 | BEND3     | -0.89701931  | 0.001552164 |
| ENSG00000002587 | HS3ST1    | -3.008805433 | 0.001571953 |
| ENSG00000164252 | AGGF1     | 0.569976073  | 0.001589435 |
| ENSG00000113368 | LMNB1     | 1.297864941  | 0.001589435 |
| ENSG00000139697 | SBNO1     | -0.308954423 | 0.001591807 |
| ENSG00000197548 | ATG7      | 0.490371174  | 0.00160687  |
| ENSG00000280067 |           | -1.019171967 | 0.001611687 |
| ENSG00000179918 | SEPHS2    | 0.642672415  | 0.001617053 |
| ENSG00000178146 |           | 0.834389461  | 0.001625535 |
| ENSG00000272941 |           | 0.949156805  | 0.001626683 |
| ENSG00000196873 | CBWD3     | 0.679897229  | 0.001638638 |
| ENSG00000186166 | CCDC84    | -0.56568997  | 0.001638638 |
| ENSG00000144843 | ADPRH     | 0.840543649  | 0.001649275 |
| ENSG00000198682 | PAPSS2    | -1.404597753 | 0.001656099 |
| ENSG00000115421 | PAPOLG    | 0.492905949  | 0.001669779 |
| ENSG00000104290 | FZD3      | -1.021503905 | 0.001697901 |
| ENSG00000101457 | DNTTIP1   | 0.611726949  | 0.001697901 |
| ENSG00000169155 | ZBTB43    | -0.902012578 | 0.001703492 |
| ENSG00000151470 | C4orf33   | 0.587556676  | 0.001716463 |
| ENSG00000112419 | PHACTR2   | 0.653629273  | 0.001722145 |
| ENSG00000185482 | STAC3     | 0.762572209  | 0.001722145 |
| ENSG00000168386 | FILIP1L   | -1.424791854 | 0.001723347 |
| ENSG00000240065 | PSMB9     | 0.766967271  | 0.001738154 |
| ENSG00000115317 | HTRA2     | 0.472740871  | 0.001747398 |
| ENSG00000184432 | COPB2     | 0.731016808  | 0.001747398 |
| ENSG00000152749 | GPR180    | 0.890235212  | 0.001761127 |
| ENSG00000152454 | ZNF256    | -0.878892329 | 0.001796186 |
| ENSG00000182866 | LCK       | -1.472042556 | 0.00180276  |
| ENSG00000102678 | FGF9      | -2.452433735 | 0.001818618 |
| ENSG00000065978 | YBX1      | -0.356271045 | 0.001830965 |
| ENSG00000172500 | FIBP      | 0.44843236   | 0.00183207  |
| ENSG00000124198 | ARFGEF2   | -0.396652744 | 0.001840387 |
| ENSG00000008056 | SYN1      | -2.586175443 | 0.001884338 |
| ENSG00000198019 | FCGR1B    | 1.173608328  | 0.001890804 |
| ENSG00000076716 | GPC4      | -1.5959933   | 0.00189146  |
| ENSG00000142937 | RPS8      | -0.405359284 | 0.001896324 |
| ENSG00000112685 | EXOC2     | 0.3995941    | 0.001909865 |
| ENSG00000175390 | EIF3F     | -0.323593766 | 0.001914783 |
| ENSG00000117009 | KMO       | 0.973774064  | 0.001915401 |
| ENSG00000156671 | SAMD8     | -0.471733352 | 0.001915401 |
| ENSG00000257242 | LINC01619 | -1.542005183 | 0.001915401 |
| ENSG00000138623 | SEMA7A    | -1.37740608  | 0.001915401 |
| ENSG00000101150 | TPD52L2   | -0.461200119 | 0.001916761 |
| ENSG00000112033 | PPARD     | -0.549104566 | 0.001936739 |



|                 |           |              |             |
|-----------------|-----------|--------------|-------------|
| ENSG00000132670 | PTPRA     | 0.292647466  | 0.001941395 |
| ENSG00000131263 | RLIM      | -0.658386329 | 0.001961048 |
| ENSG00000123353 | ORMDL2    | 0.65412774   | 0.001961092 |
| ENSG00000099251 | HSD17B7P2 | 1.086181995  | 0.001964812 |
| ENSG00000197540 | GZMM      | -1.560272108 | 0.00197097  |
| ENSG00000145431 | PDGFC     | -1.132217388 | 0.001976851 |
| ENSG00000113532 | ST8SIA4   | 0.556252089  | 0.001978767 |
| ENSG00000140941 | MAP1LC3B  | -0.551219032 | 0.001978767 |
| ENSG00000118900 | UBN1      | -0.317051554 | 0.001992637 |
| ENSG00000166477 | LEO1      | 0.667645751  | 0.002013906 |
| ENSG00000204516 | MICB      | 0.717911701  | 0.002043789 |
| ENSG00000198455 | ZXDB      | -0.545110074 | 0.002057087 |
| ENSG00000064651 | SLC12A2   | -0.652318238 | 0.002057444 |
| ENSG00000005471 | ABCB4     | -2.158818941 | 0.002067146 |
| ENSG00000242324 |           | 1.324755085  | 0.002067146 |
| ENSG00000234444 | ZNF736    | -0.470181398 | 0.002071936 |
| ENSG00000225032 |           | -1.158091157 | 0.002071936 |
| ENSG00000109184 | DCUN1D4   | -0.480659184 | 0.002073664 |
| ENSG00000133112 | TPT1      | -0.373508402 | 0.002086916 |
| ENSG00000155097 | ATP6V1C1  | 0.441054363  | 0.002094667 |
| ENSG00000198890 | PRMT6     | 0.783825537  | 0.002111952 |
| ENSG00000231721 | LINC-PINT | -0.949654682 | 0.002111952 |
| ENSG00000186642 | PDE2A     | -2.211339618 | 0.002111952 |
| ENSG00000230551 |           | -0.696209101 | 0.002113761 |
| ENSG00000029363 | BCLAF1    | -0.457014873 | 0.00211579  |
| ENSG00000214199 | EEF1A1P12 | -0.405441756 | 0.002132462 |
| ENSG00000188522 | FAM83G    | -1.426268838 | 0.002133903 |
| ENSG00000138795 | LEF1      | -1.705121542 | 0.002145146 |
| ENSG00000085662 | AKR1B1    | -0.481464119 | 0.002148679 |
| ENSG00000103489 | XYLT1     | -0.578515207 | 0.002148679 |
| ENSG00000229299 |           | -1.262747337 | 0.002148679 |
| ENSG00000156381 | ANKRD9    | -0.917564001 | 0.002151057 |
| ENSG00000167733 | HSD11B1L  | -0.735223028 | 0.002161375 |
| ENSG00000136870 | ZNF189    | 0.718656168  | 0.002179116 |
| ENSG00000181523 | SGSH      | -0.533860181 | 0.002182772 |
| ENSG00000188811 | NHLRC3    | 0.727683633  | 0.002188172 |
| ENSG00000228486 | LINC01125 | -0.727659466 | 0.002194321 |
| ENSG00000104517 | UBR5      | -0.322859584 | 0.002194321 |
| ENSG00000198734 | F5        | 0.945549826  | 0.002196139 |
| ENSG00000251022 | THAP9-AS1 | -0.550503054 | 0.002199729 |
| ENSG00000155592 | ZKSCAN2   | -0.68618356  | 0.002199729 |
| ENSG00000101096 | NFATC2    | -1.055769185 | 0.002201553 |
| ENSG00000087903 | RFX2      | -0.782614828 | 0.002213087 |
| ENSG00000181220 | ZNF746    | -0.439060526 | 0.002233386 |
| ENSG00000107758 | PPP3CB    | 0.339719388  | 0.002237911 |
| ENSG00000147996 | CBWD5     | 0.633264026  | 0.002241191 |
| ENSG00000110079 | MS4A4A    | 1.603026507  | 0.002245104 |
| ENSG00000105808 | RASA4     | -0.718659743 | 0.002253892 |

|                 |          |              |             |
|-----------------|----------|--------------|-------------|
| ENSG00000156345 | CDK20    | -0.968509517 | 0.002253892 |
| ENSG00000189079 | ARID2    | -0.496494458 | 0.002253892 |
| ENSG00000260920 |          | 0.97796023   | 0.002259585 |
| ENSG00000105705 | SUGP1    | 0.413381891  | 0.002280656 |
| ENSG00000135211 | TMEM60   | 0.998917981  | 0.00231268  |
| ENSG00000178429 | RPS3AP5  | -0.528079131 | 0.002321199 |
| ENSG00000088298 | EDEM2    | 0.35983172   | 0.002321199 |
| ENSG00000163814 | CDCP1    | -2.046984228 | 0.002329915 |
| ENSG00000154511 | FAM69A   | 0.740266775  | 0.002337168 |
| ENSG00000235245 |          | -0.698754264 | 0.002338797 |
| ENSG00000197043 | ANXA6    | 0.758189956  | 0.002340164 |
| ENSG00000143771 | CNIH4    | 0.561687449  | 0.002353002 |
| ENSG00000155463 | OXA1L    | -0.332314722 | 0.002364361 |
| ENSG00000127452 | FBXL12   | -0.347490918 | 0.002364361 |
| ENSG00000145779 | TNFAIP8  | 0.691544159  | 0.002382236 |
| ENSG00000185728 | YTHDF3   | -0.57907665  | 0.002382236 |
| ENSG00000112406 | HECA     | -0.50456269  | 0.002386707 |
| ENSG00000243811 | APOBEC3D | 0.900172025  | 0.002398436 |
| ENSG00000063438 | AHRR     | -2.663526848 | 0.002404336 |
| ENSG00000092330 | TINF2    | 0.367548403  | 0.002405518 |
| ENSG00000141503 | MINK1    | -0.39728031  | 0.002415639 |
| ENSG00000171612 | SLC25A33 | -0.76273916  | 0.00242878  |
| ENSG00000005302 | MSL3     | 0.400123849  | 0.002436153 |
| ENSG00000140931 | CMTM3    | -0.374850365 | 0.002436153 |
| ENSG00000119878 | CRIP1    | 0.536964804  | 0.002449795 |
| ENSG00000134324 | LPIN1    | -0.463255715 | 0.002466378 |
| ENSG00000038274 | MAT2B    | 0.622065353  | 0.002466396 |
| ENSG00000239521 | GATS     | -0.702756499 | 0.002466396 |
| ENSG00000173726 | TOMM20   | -0.360701421 | 0.002468173 |
| ENSG00000121067 | SPOP     | 0.405001966  | 0.002475639 |
| ENSG00000163159 | VPS72    | 0.707506597  | 0.002517001 |
| ENSG00000242689 | CNTF     | -0.946525195 | 0.002517377 |
| ENSG00000145741 | BTF3     | -0.306689547 | 0.002541567 |
| ENSG00000138413 | IDH1     | 0.743664583  | 0.002545322 |
| ENSG00000188282 | RUFY4    | 1.339308965  | 0.002545322 |
| ENSG00000170271 | FAXDC2   | -1.250922936 | 0.002547717 |
| ENSG00000072818 | ACAP1    | 0.503038547  | 0.002547717 |
| ENSG00000148303 | RPL7A    | -0.342156243 | 0.002636741 |
| ENSG00000163512 | AZI2     | 0.431146161  | 0.002673478 |
| ENSG00000095002 | MSH2     | 0.870178884  | 0.002684521 |
| ENSG00000065559 | MAP2K4   | 0.332679557  | 0.002690452 |
| ENSG00000048342 | CC2D2A   | -1.206130607 | 0.002693687 |
| ENSG00000182742 | HOXB4    | 1.424964527  | 0.002693687 |
| ENSG00000129038 | LOXL1    | -2.389580353 | 0.002710877 |
| ENSG00000163975 | MELTF    | -1.763904257 | 0.002722932 |
| ENSG00000052802 | MSMO1    | 0.577940857  | 0.002722932 |
| ENSG00000151491 | EPS8     | -0.811184201 | 0.002722932 |
| ENSG00000105186 | ANKRD27  | 0.397796209  | 0.002722932 |

|                 |              |              |             |
|-----------------|--------------|--------------|-------------|
| ENSG00000106263 | EIF3B        | -0.328586201 | 0.00273199  |
| ENSG00000137642 | SORL1        | -0.675938827 | 0.00273199  |
| ENSG00000183508 | FAM46C       | -1.873468474 | 0.002732891 |
| ENSG00000116691 | MIIP         | 0.446395452  | 0.002739519 |
| ENSG00000175518 | UBQLNL       | 1.688013065  | 0.002739519 |
| ENSG00000225648 | SBDSP1       | -0.615524031 | 0.002740653 |
| ENSG00000232613 |              | -3.101347329 | 0.002742538 |
| ENSG00000114270 | COL7A1       | -0.692185253 | 0.002742538 |
| ENSG00000133985 | TTC9         | 1.011320421  | 0.002742538 |
| ENSG00000260911 |              | -1.058791999 | 0.002742538 |
| ENSG00000267701 | NA           | -1.385703261 | 0.002742538 |
| ENSG00000104408 | EIF3E        | -0.357645225 | 0.002746011 |
| ENSG00000128739 | SNRPN        | -0.583087158 | 0.002746011 |
| ENSG00000119471 | HSDL2        | 0.740598601  | 0.002756564 |
| ENSG00000212802 | RPL15P3      | -0.471378113 | 0.00278304  |
| ENSG00000196187 | TMEM63A      | 0.693663309  | 0.002796133 |
| ENSG00000204568 | MRPS18B      | 0.746888019  | 0.002796133 |
| ENSG00000133561 | GIMAP6       | 1.258948028  | 0.002796133 |
| ENSG00000277117 |              | -1.90266652  | 0.002810758 |
| ENSG00000035687 | ADSS         | 0.390433351  | 0.00282683  |
| ENSG00000178035 | IMPDH2       | -0.55879923  | 0.002832768 |
| ENSG00000101574 | METTL4       | 0.51907169   | 0.002850752 |
| ENSG00000144741 | SLC25A26     | -0.428823486 | 0.002857066 |
| ENSG00000077420 | APBB1IP      | 0.488684342  | 0.002858359 |
| ENSG00000106628 | POLD2        | -0.512006318 | 0.002882353 |
| ENSG00000231607 | DLEU2        | 0.752516441  | 0.002882353 |
| ENSG00000253797 | UTP14C       | 0.692443349  | 0.002882931 |
| ENSG00000138760 | SCARB2       | 0.5483248    | 0.002885948 |
| ENSG00000111911 | HINT3        | 0.551235273  | 0.002920095 |
| ENSG00000120158 | RCL1         | -0.6376707   | 0.002920095 |
| ENSG00000103353 | UBFD1        | 0.557723342  | 0.002928257 |
| ENSG00000138246 | DNAJC13      | 0.546192067  | 0.002938018 |
| ENSG00000110321 | EIF4G2       | -0.33140512  | 0.002949318 |
| ENSG00000224032 | EPB41L4A-AS1 | -0.595186025 | 0.002959798 |
| ENSG00000120254 | MTHFD1L      | -0.959522713 | 0.002959798 |
| ENSG00000057757 | PITHD1       | -0.428899191 | 0.002981896 |
| ENSG00000170606 | HSPA4        | 0.403559175  | 0.002981896 |
| ENSG00000033050 | ABCF2        | 0.467389161  | 0.002981896 |
| ENSG00000168259 | DNAJC7       | 0.382558516  | 0.002981896 |
| ENSG00000136717 | BIN1         | -0.901516662 | 0.002995912 |
| ENSG00000121741 | ZMYM2        | -0.414711538 | 0.002995912 |
| ENSG00000156508 | EEF1A1       | -0.395567064 | 0.003008415 |
| ENSG00000168066 | SF1          | -0.389846469 | 0.003008415 |
| ENSG00000151500 | THYN1        | 0.630691037  | 0.003008415 |
| ENSG00000242071 | RPL7AP6      | -0.360892463 | 0.003008415 |
| ENSG00000185359 | HGS          | -0.402970899 | 0.003008415 |
| ENSG00000132199 | ENOSF1       | -0.682445271 | 0.003008415 |
| ENSG00000130749 | ZC3H4        | 0.391554119  | 0.003008415 |

|                 |           |              |             |
|-----------------|-----------|--------------|-------------|
| ENSG00000155876 | RRAGA     | 0.436951518  | 0.003016512 |
| ENSG00000152465 | NMT2      | -0.887883228 | 0.003016512 |
| ENSG00000167461 | RAB8A     | 0.504435874  | 0.003016512 |
| ENSG00000169764 | UGP2      | 0.595925211  | 0.003053978 |
| ENSG00000105829 | BET1      | 0.64074169   | 0.003062201 |
| ENSG00000170677 | SOCS6     | -0.840702925 | 0.003063876 |
| ENSG00000109084 | TMEM97    | -1.201365509 | 0.003071105 |
| ENSG00000156711 | MAPK13    | -0.733256623 | 0.003090011 |
| ENSG00000087263 | OGFOD1    | 0.696571451  | 0.003090011 |
| ENSG00000111196 | MAGOHB    | 0.519461483  | 0.003090902 |
| ENSG00000215271 | HOMEZ     | 1.031949055  | 0.003102659 |
| ENSG00000138594 | TMOD3     | 0.57275193   | 0.003102659 |
| ENSG00000131051 | RBM39     | -0.420589579 | 0.003114034 |
| ENSG00000143155 | TIPRL     | 0.433952927  | 0.003142887 |
| ENSG00000085465 | OVGP1     | -1.008737082 | 0.003213631 |
| ENSG00000112996 | MRPS30    | 0.458430944  | 0.003213631 |
| ENSG00000234797 | RPS3AP6   | -0.447115672 | 0.003213631 |
| ENSG00000155093 | PTPRN2    | 0.950989755  | 0.003217944 |
| ENSG00000065491 | TBC1D22B  | 0.324272694  | 0.003221871 |
| ENSG00000032742 | IFT88     | -0.649316149 | 0.003302557 |
| ENSG00000260708 |           | -0.846713898 | 0.003320601 |
| ENSG00000171115 | GIMAP8    | 1.367493149  | 0.003327345 |
| ENSG00000267040 |           | 0.73455108   | 0.003361249 |
| ENSG00000151929 | BAG3      | -0.712147427 | 0.003365203 |
| ENSG00000153561 | RMND5A    | -0.354876164 | 0.003368201 |
| ENSG00000159164 | SV2A      | -1.245528172 | 0.003407143 |
| ENSG00000146830 | GIGYF1    | -0.307077586 | 0.003407143 |
| ENSG00000203814 | HIST2H2BF | 0.892231409  | 0.003471852 |
| ENSG00000137492 | THAP12    | -0.357476833 | 0.003471852 |
| ENSG00000161860 | SYCE2     | -1.856873737 | 0.003471852 |
| ENSG00000109079 | TNFAIP1   | 0.637721372  | 0.003500491 |
| ENSG00000128272 | ATF4      | -0.458125728 | 0.003538844 |
| ENSG00000105821 | DNAJC2    | -0.555727941 | 0.003589115 |
| ENSG00000141994 | DUS3L     | -0.557466223 | 0.003594956 |
| ENSG00000135828 | RNASL     | 0.944457289  | 0.003602617 |
| ENSG00000090470 | PDCD7     | 0.447409352  | 0.003607657 |
| ENSG00000101224 | CDC25B    | -0.446356389 | 0.003626123 |
| ENSG00000117318 | ID3       | -1.402232471 | 0.003626385 |
| ENSG00000100266 | PACSIN2   | 0.491889448  | 0.003626385 |
| ENSG00000177733 | HNRNPA0   | -0.341285914 | 0.003646708 |
| ENSG00000145675 | PIK3R1    | -0.799355782 | 0.003683009 |
| ENSG00000102119 | EMD       | -0.681298894 | 0.003683229 |
| ENSG00000270972 |           | 2.339624225  | 0.003683229 |
| ENSG00000182809 | CRIP2     | -1.718237104 | 0.003683229 |
| ENSG00000062485 | CS        | -0.310243883 | 0.003687181 |
| ENSG00000110619 | CARS      | 0.359987316  | 0.003696748 |
| ENSG00000095139 | ARCN1     | 0.472500928  | 0.003704925 |
| ENSG00000100100 | PIK3IP1   | -0.757973921 | 0.003727115 |

|                 |          |              |             |
|-----------------|----------|--------------|-------------|
| ENSG0000075884  | ARHGAP15 | 0.382479451  | 0.003728793 |
| ENSG00000163738 | MTHFD2L  | -0.632850604 | 0.003728793 |
| ENSG00000140992 | PDPK1    | -0.32678655  | 0.003728793 |
| ENSG00000196428 | TSC22D2  | -0.567821406 | 0.003769818 |
| ENSG00000177426 | TGIF1    | -0.928134831 | 0.003769818 |
| ENSG00000226742 | HSBP1L1  | -0.754967928 | 0.00377588  |
| ENSG00000025156 | HSF2     | -0.599702548 | 0.003797059 |
| ENSG00000081059 | TCF7     | -1.502247146 | 0.003830239 |
| ENSG00000167671 | UBXN6    | -0.348177671 | 0.00383292  |
| ENSG00000115137 | DNAJC27  | -0.43848122  | 0.003864424 |
| ENSG00000239857 | GET4     | -0.525152197 | 0.003864548 |
| ENSG00000131931 | THAP1    | 0.546022301  | 0.003864548 |
| ENSG00000132357 | CARD6    | 0.959201238  | 0.003887367 |
| ENSG00000079215 | SLC1A3   | 0.948336765  | 0.003895587 |
| ENSG00000244486 | SCARF2   | -1.086773404 | 0.003910019 |
| ENSG00000259330 | INAFM2   | -0.504622876 | 0.003926619 |
| ENSG00000138138 | ATAD1    | 0.415767959  | 0.003936665 |
| ENSG00000037897 | METTL1   | -0.855166662 | 0.003965447 |
| ENSG00000120063 | GNA13    | -0.797514915 | 0.003965447 |
| ENSG00000240857 | RDH14    | 0.552851645  | 0.00398134  |
| ENSG00000100181 | TPTEP1   | -1.279376839 | 0.003991633 |
| ENSG00000114120 | SLC25A36 | -0.472102694 | 0.003995881 |
| ENSG00000142396 | ERVK3-1  | -0.512859788 | 0.003995881 |
| ENSG00000226751 |          | 1.850187574  | 0.003995881 |
| ENSG00000117143 | UAP1     | -0.870433256 | 0.003999211 |
| ENSG00000280088 |          | 0.437007254  | 0.004009782 |
| ENSG00000141378 | PTRH2    | 0.527586739  | 0.004009782 |
| ENSG00000172071 | EIF2AK3  | -0.863570188 | 0.004024549 |
| ENSG00000169508 | GPR183   | -1.445374853 | 0.004032169 |
| ENSG00000084093 | REST     | -0.368091238 | 0.004041988 |
| ENSG00000279088 |          | -0.620452528 | 0.004041988 |
| ENSG00000144554 | FANCD2   | -0.577871221 | 0.004054148 |
| ENSG00000089916 | GPATCH2L | -0.407177448 | 0.004073434 |
| ENSG00000131779 | PEX11B   | 0.696371753  | 0.004115505 |
| ENSG00000198755 | RPL10A   | -0.345006014 | 0.004120043 |
| ENSG00000240849 | TMEM189  | -0.346427548 | 0.004132724 |
| ENSG00000105127 | AKAP8    | -0.415689144 | 0.004133052 |
| ENSG00000273559 | CWC25    | -0.526035563 | 0.004135911 |
| ENSG00000228057 | SEC63P1  | -1.018442994 | 0.004150716 |
| ENSG00000142655 | PEX14    | 0.424557177  | 0.00415339  |
| ENSG00000231113 |          | -0.424773256 | 0.004185619 |
| ENSG00000258944 |          | -0.642554447 | 0.004212061 |
| ENSG00000188554 | NBR1     | 0.537043113  | 0.004248265 |
| ENSG00000113790 | EHHADH   | 1.02957952   | 0.004249646 |
| ENSG00000143891 | GALM     | 0.76978955   | 0.004262553 |
| ENSG00000136802 | LRRC8A   | -0.426706411 | 0.004323039 |
| ENSG00000184216 | IRAK1    | -0.46717127  | 0.004337294 |
| ENSG00000129636 | ITFG1    | 0.345955211  | 0.004337294 |

|                 |            |              |             |
|-----------------|------------|--------------|-------------|
| ENSG00000149932 | TMEM219    | 0.288209132  | 0.004346287 |
| ENSG00000095637 | SORBS1     | -1.364236544 | 0.004348138 |
| ENSG00000158715 | SLC45A3    | -1.756009011 | 0.004364752 |
| ENSG00000079785 | DDX1       | 0.402876363  | 0.004365301 |
| ENSG00000151893 | CACUL1     | -0.333772346 | 0.004421109 |
| ENSG00000204257 | HLA-DMA    | -0.671203134 | 0.00445413  |
| ENSG00000134014 | ELP3       | 0.49249769   | 0.00445413  |
| ENSG00000101413 | RPRD1B     | -0.696530138 | 0.00445413  |
| ENSG00000123360 | PDE1B      | -0.980697582 | 0.004473053 |
| ENSG00000130340 | SNX9       | -1.314108429 | 0.004479385 |
| ENSG00000117533 | VAMP4      | 0.546016805  | 0.004503412 |
| ENSG00000105402 | NAPA       | 0.479950895  | 0.004503412 |
| ENSG00000048471 | SNX29      | -0.494968337 | 0.004541102 |
| ENSG00000182118 | FAM89A     | 0.776591098  | 0.004548564 |
| ENSG00000235776 |            | -0.403129559 | 0.004569934 |
| ENSG00000086544 | ITPKC      | 0.531837431  | 0.004578335 |
| ENSG00000261067 |            | -0.598860883 | 0.004592313 |
| ENSG00000130561 | SAG        | -0.769700237 | 0.004636669 |
| ENSG00000196498 | NCOR2      | -0.408760145 | 0.00464789  |
| ENSG00000075292 | ZNF638     | 0.481174779  | 0.004661128 |
| ENSG00000115514 | TXNDC9     | 0.648884912  | 0.004697421 |
| ENSG00000131351 | HAUS8      | -0.617590196 | 0.004697421 |
| ENSG00000274211 | SOCS7      | -0.430254139 | 0.004730424 |
| ENSG00000160908 | ZNF394     | -0.633633542 | 0.004730995 |
| ENSG00000204389 | HSPA1A     | 0.996114962  | 0.004736582 |
| ENSG00000053770 | AP5M1      | 0.408331424  | 0.004736582 |
| ENSG00000203395 |            | -1.182160645 | 0.004738939 |
| ENSG00000197380 | DACT3      | -1.211222538 | 0.004738939 |
| ENSG00000162222 | TTC9C      | 0.995410635  | 0.004741123 |
| ENSG00000133216 | EPHB2      | 1.536408503  | 0.004750334 |
| ENSG00000184988 | TMEM106A   | 0.813528041  | 0.004750334 |
| ENSG00000141219 | C17orf80   | 0.925637788  | 0.004750334 |
| ENSG00000196313 | POM121     | -0.288348754 | 0.004750406 |
| ENSG00000166313 | APBB1      | -0.812425969 | 0.00477059  |
| ENSG00000169045 | HNRNPH1    | -0.332226899 | 0.004805989 |
| ENSG00000129696 | TTI2       | 0.536370621  | 0.00484213  |
| ENSG00000138834 | MAPK8IP3   | -0.366391972 | 0.004843194 |
| ENSG00000145495 | Mar-06     | -0.383230108 | 0.004856012 |
| ENSG00000181896 | ZNF101     | 0.555646753  | 0.004894174 |
| ENSG00000169057 | MECP2      | -0.436106579 | 0.004909923 |
| ENSG00000243335 | KCTD7      | -0.796191835 | 0.004919515 |
| ENSG00000186767 | SPIN4      | -0.900213594 | 0.004924221 |
| ENSG00000136840 | ST6GALNAC4 | -0.662363748 | 0.004924221 |
| ENSG00000267194 |            | 0.999715344  | 0.004924221 |
| ENSG00000263731 |            | -0.645757012 | 0.004964164 |
| ENSG00000065809 | FAM107B    | -0.539028823 | 0.004992053 |
| ENSG00000172171 | TEFM       | 0.619390759  | 0.005053308 |
| ENSG00000119986 | AVPI1      | -1.715508023 | 0.005062354 |

|                 |           |              |             |
|-----------------|-----------|--------------|-------------|
| ENSG00000170921 | TANC2     | -0.65379686  | 0.005062354 |
| ENSG00000108604 | SMARCD2   | 0.385815056  | 0.005062354 |
| ENSG00000105193 | RPS16     | -0.366462054 | 0.005062354 |
| ENSG00000074935 | TUBE1     | 0.501642903  | 0.005079893 |
| ENSG00000156011 | PSD3      | -1.141983907 | 0.005086192 |
| ENSG00000170456 | DENND5B   | -0.932568281 | 0.005086192 |
| ENSG00000148154 | UGCG      | -0.538806481 | 0.005094296 |
| ENSG00000273173 | SNURF     | -2.217540928 | 0.005111438 |
| ENSG00000179933 | C14orf119 | 0.794324598  | 0.00511222  |
| ENSG00000213261 | EEF1B2P6  | -1.038674193 | 0.0051182   |
| ENSG00000115271 | GCA       | 0.739496265  | 0.005168825 |
| ENSG00000176641 | RNF152    | -2.261924743 | 0.005170812 |
| ENSG00000120333 | MRPS14    | 0.735598161  | 0.005197307 |
| ENSG00000136448 | NMT1      | 0.587891536  | 0.005218012 |
| ENSG00000102575 | ACP5      | -0.726247964 | 0.005221542 |
| ENSG00000135535 | CD164     | 0.418337365  | 0.005244605 |
| ENSG00000162139 | NEU3      | -0.436111378 | 0.005249626 |
| ENSG00000116560 | SFPQ      | -0.450624477 | 0.005285127 |
| ENSG00000165392 | WRN       | -0.508090059 | 0.005297533 |
| ENSG00000140367 | UBE2Q2    | -0.414974025 | 0.005297533 |
| ENSG00000250251 | PKD1P6    | -0.555179691 | 0.005297533 |
| ENSG00000187583 | PLEKHN1   | 0.995157948  | 0.00530671  |
| ENSG00000144744 | UBA3      | 0.481381467  | 0.00530671  |
| ENSG00000280398 |           | -1.24218104  | 0.00530671  |
| ENSG00000103365 | GGA2      | -0.482086248 | 0.00530671  |
| ENSG00000174871 | CNIH2     | -1.073034677 | 0.00531574  |
| ENSG00000254685 | FPGT      | 0.694235577  | 0.005325862 |
| ENSG00000114956 | DGUOK     | 0.296644351  | 0.005329528 |
| ENSG00000251634 |           | 1.530203258  | 0.005329528 |
| ENSG00000004766 | VPS50     | 0.383330107  | 0.005329528 |
| ENSG00000258875 |           | -1.25041477  | 0.005369947 |
| ENSG00000162664 | ZNF326    | -0.584624974 | 0.005415307 |
| ENSG00000165637 | VDAC2     | -0.334719472 | 0.005420225 |
| ENSG00000092067 | CEBPE     | 1.049692247  | 0.005420225 |
| ENSG00000260179 |           | -0.990734441 | 0.005441017 |
| ENSG00000146757 | ZNF92     | -0.646496131 | 0.005466108 |
| ENSG00000258890 | CEP95     | -0.516769844 | 0.005481472 |
| ENSG00000211668 | IGLV2-11  | -3.090378021 | 0.00549512  |
| ENSG00000086102 | NFX1      | -0.497546651 | 0.005501067 |
| ENSG00000162714 | ZNF496    | 0.601448994  | 0.005509897 |
| ENSG00000115524 | SF3B1     | -0.302908893 | 0.005509897 |
| ENSG00000182568 | SATB1     | -0.605837848 | 0.005509897 |
| ENSG00000103496 | STX4      | -0.497818001 | 0.005565844 |
| ENSG00000173706 | HEG1      | 0.648331689  | 0.005601333 |
| ENSG00000164430 | MB21D1    | 0.749612566  | 0.005606658 |
| ENSG00000142546 | NOSIP     | 0.55327582   | 0.005628744 |
| ENSG00000028116 | VRK2      | 0.471576161  | 0.005657054 |
| ENSG00000176155 | CCDC57    | -0.350473698 | 0.005668479 |

|                 |          |              |             |
|-----------------|----------|--------------|-------------|
| ENSG00000198363 | ASPH     | -0.80004184  | 0.005679244 |
| ENSG00000100387 | RBX1     | 0.454776249  | 0.005679733 |
| ENSG00000096717 | SIRT1    | -0.566389559 | 0.00568568  |
| ENSG00000172828 | CES3     | -1.07716118  | 0.00568568  |
| ENSG00000063180 | CA11     | -0.774703867 | 0.005720175 |
| ENSG00000231925 | TAPBP    | 0.349117523  | 0.005734262 |
| ENSG00000105708 | ZNF14    | -0.707494272 | 0.005748332 |
| ENSG00000107262 | BAG1     | 0.347251125  | 0.005781448 |
| ENSG00000140853 | NLRC5    | 0.427735217  | 0.005814087 |
| ENSG00000123136 | DDX39A   | -0.518246929 | 0.005823587 |
| ENSG00000164104 | HMGB2    | 0.586157999  | 0.005826264 |
| ENSG00000154310 | TNIK     | 0.684416319  | 0.005833838 |
| ENSG00000143947 | RPS27A   | -0.358229086 | 0.005874523 |
| ENSG00000139211 | AMIGO2   | 0.671162168  | 0.005874523 |
| ENSG00000167522 | ANKRD11  | -0.291400579 | 0.005874523 |
| ENSG00000147457 | CHMP7    | 0.553792076  | 0.005879205 |
| ENSG00000231025 | NA       | -0.390402367 | 0.005888426 |
| ENSG00000198677 | TTC37    | 0.369855754  | 0.005902078 |
| ENSG00000204099 | NEU4     | -2.993766429 | 0.00590791  |
| ENSG00000213085 | CFAP45   | -1.362197238 | 0.005924911 |
| ENSG00000126262 | FFAR2    | 1.244244867  | 0.005924911 |
| ENSG00000100425 | BRD1     | -0.604378712 | 0.005924911 |
| ENSG00000144468 | RHBDD1   | 0.384446412  | 0.005928463 |
| ENSG00000166822 | TMEM170A | -0.325968286 | 0.005928463 |
| ENSG00000116754 | SRSF11   | -0.331662641 | 0.005944418 |
| ENSG00000163069 | SGCB     | -0.75797434  | 0.006010373 |
| ENSG00000112137 | PHACTR1  | -1.659830782 | 0.006085466 |
| ENSG00000214783 |          | -0.900235444 | 0.006085514 |
| ENSG00000173801 | JUP      | 1.40050464   | 0.006096912 |
| ENSG00000176624 | MEX3C    | -0.505350944 | 0.006113141 |
| ENSG00000187193 | MT1X     | 0.811502077  | 0.006126881 |
| ENSG00000169682 | SPNS1    | -0.530827012 | 0.006144655 |
| ENSG00000244945 |          | -1.138333755 | 0.006153577 |
| ENSG00000254521 | SIGLEC12 | 2.062237778  | 0.006153577 |
| ENSG00000130517 | PGPEP1   | -0.505299159 | 0.006158499 |
| ENSG00000049759 | NEDD4L   | -0.61833592  | 0.006167465 |
| ENSG00000185404 | SP140L   | 0.475448775  | 0.006176314 |
| ENSG00000158186 | MRAS     | -0.985298402 | 0.006176314 |
| ENSG00000163960 | UBXN7    | -0.373557167 | 0.006176314 |
| ENSG00000106635 | BCL7B    | -0.534213873 | 0.006176314 |
| ENSG00000147677 | EIF3H    | -0.23475146  | 0.006176314 |
| ENSG00000140153 | WDR20    | -0.314328779 | 0.006181292 |
| ENSG00000131558 | EXOC4    | 0.491375214  | 0.006204808 |
| ENSG00000139514 | SLC7A1   | -0.742072689 | 0.006211784 |
| ENSG00000237940 |          | -0.934675342 | 0.006279192 |
| ENSG00000172936 | MYD88    | 0.433265576  | 0.006314639 |
| ENSG00000198218 | QRICH1   | -0.319064079 | 0.006314639 |
| ENSG00000244005 | NFS1     | 0.449698464  | 0.006314639 |



|                 |           |              |             |
|-----------------|-----------|--------------|-------------|
| ENSG00000139370 | SLC15A4   | 0.64431983   | 0.006323004 |
| ENSG00000169371 | SNUPN     | 0.482440001  | 0.006327888 |
| ENSG00000100647 | SUSD6     | -0.335353982 | 0.006354977 |
| ENSG00000273038 |           | -1.36446766  | 0.006363872 |
| ENSG00000117091 | CD48      | 0.345558491  | 0.006404225 |
| ENSG00000204315 | FKBPL     | 0.982817143  | 0.006404225 |
| ENSG00000112110 | MRPL18    | 0.629604924  | 0.006404225 |
| ENSG00000134575 | ACP2      | 0.520967547  | 0.006404225 |
| ENSG00000067057 | PFKP      | 0.533079489  | 0.006418017 |
| ENSG00000198301 | SDAD1     | 0.435980877  | 0.006453446 |
| ENSG00000124782 | RREB1     | -0.323654434 | 0.006453446 |
| ENSG00000147168 | IL2RG     | 0.406207749  | 0.006462908 |
| ENSG00000198668 | CALM1     | 0.392599644  | 0.006462908 |
| ENSG00000020633 | RUNX3     | -0.649457449 | 0.006492187 |
| ENSG00000203710 | CR1       | 0.890272328  | 0.006492187 |
| ENSG00000137806 | NDUFAF1   | 0.76567439   | 0.006492187 |
| ENSG00000089639 | GMIP      | 0.270232922  | 0.006492187 |
| ENSG00000070476 | ZXDC      | -0.276739323 | 0.006586063 |
| ENSG00000103671 | TRIP4     | 0.450119598  | 0.006602879 |
| ENSG00000125779 | PANK2     | 0.490713033  | 0.006605745 |
| ENSG00000225828 | FAM229A   | -0.468384966 | 0.006608517 |
| ENSG00000129116 | PALLD     | -1.117418915 | 0.006608517 |
| ENSG00000262528 |           | -0.933071539 | 0.006610113 |
| ENSG00000171204 | TMEM126B  | 0.458516949  | 0.00662034  |
| ENSG00000100911 | PSME2     | 0.521288919  | 0.006626801 |
| ENSG00000174574 | AKIRIN1   | -0.320501246 | 0.00663208  |
| ENSG00000181163 | NPM1      | -0.331979103 | 0.006645034 |
| ENSG00000175550 | DRAP1     | 0.552334676  | 0.006645034 |
| ENSG00000140406 | MESDC1    | -0.629453814 | 0.00667554  |
| ENSG00000132326 | PER2      | -0.823907868 | 0.006685867 |
| ENSG00000161202 | DVL3      | -0.381516088 | 0.006748785 |
| ENSG00000274943 |           | -1.028371141 | 0.006768992 |
| ENSG00000136485 | DCAF7     | 0.630624909  | 0.006768992 |
| ENSG00000154710 | RABGEF1   | -0.898492609 | 0.006785451 |
| ENSG00000229754 | CXCR2P1   | 1.70987682   | 0.006857107 |
| ENSG00000077514 | POLD3     | 0.693416471  | 0.006857107 |
| ENSG00000111674 | ENO2      | -1.447008061 | 0.006870145 |
| ENSG00000168237 | GLYCTK    | 0.414668706  | 0.006879233 |
| ENSG00000148229 | POLE3     | -0.397883651 | 0.006879233 |
| ENSG00000246100 | LINC00900 | -1.183314972 | 0.006879233 |
| ENSG00000100804 | PSMB5     | 0.52485759   | 0.006879233 |
| ENSG00000171497 | PPID      | 0.459303006  | 0.006885191 |
| ENSG00000006634 | DBF4      | -0.826507354 | 0.006885191 |
| ENSG00000139567 | ACVRL1    | 1.073481706  | 0.006885191 |
| ENSG00000123836 | PFKFB2    | -0.636721554 | 0.006897326 |
| ENSG00000135336 | ORC3      | 0.457259274  | 0.006932821 |
| ENSG00000122482 | ZNF644    | -0.443447853 | 0.00696676  |
| ENSG00000168993 | CPLX1     | -2.794725464 | 0.00696676  |

|                 |          |              |             |
|-----------------|----------|--------------|-------------|
| ENSG00000157933 | SKI      | -0.577433559 | 0.006974959 |
| ENSG00000119844 | AFTPH    | 0.416343601  | 0.006981491 |
| ENSG00000204217 | BMPR2    | 0.47535105   | 0.00701143  |
| ENSG00000204160 | ZDHHC18  | -0.343957698 | 0.0070219   |
| ENSG00000163877 | SNIP1    | -0.776925784 | 0.007024228 |
| ENSG00000227345 | PARG     | 0.392048469  | 0.007057764 |
| ENSG00000113761 | ZNF346   | 0.542375262  | 0.007083275 |
| ENSG00000170881 | RNF139   | -0.443427011 | 0.007108989 |
| ENSG00000095397 | WHRN     | -1.258378992 | 0.007111994 |
| ENSG00000185101 | ANO9     | -1.465364334 | 0.007111994 |
| ENSG00000083635 | NUFIP1   | -0.624158305 | 0.007111994 |
| ENSG00000114857 | NKTR     | -0.391024314 | 0.007148284 |
| ENSG00000134644 | PUM1     | 0.270884298  | 0.007152408 |
| ENSG00000137500 | CCDC90B  | 0.374120906  | 0.00715338  |
| ENSG00000278864 |          | -1.013063444 | 0.007154587 |
| ENSG00000112303 | VNN2     | 0.540578974  | 0.007223292 |
| ENSG00000160602 | NEK8     | 0.566476006  | 0.007238506 |
| ENSG00000185753 | CXorf38  | 0.556653198  | 0.007249285 |
| ENSG00000204628 | RACK1    | -0.271909915 | 0.007350765 |
| ENSG00000137817 | PARP6    | -0.313575325 | 0.007401721 |
| ENSG00000163870 | TPRA1    | -0.792006276 | 0.007412809 |
| ENSG00000157593 | SLC35B2  | -0.599545516 | 0.007415582 |
| ENSG00000147403 | RPL10    | -0.349829086 | 0.007448887 |
| ENSG00000185085 | INTS5    | 0.742620433  | 0.007448887 |
| ENSG00000137752 | CASP1    | 0.631293426  | 0.007448887 |
| ENSG00000175197 | DDIT3    | -0.90100809  | 0.007448887 |
| ENSG00000119431 | HDHD3    | 0.679148654  | 0.00745723  |
| ENSG00000171262 | FAM98B   | 0.716497362  | 0.007459158 |
| ENSG00000180228 | PRKRA    | -0.326004434 | 0.007460649 |
| ENSG00000176225 | RTTN     | -0.456910107 | 0.007475541 |
| ENSG00000085231 | AK6      | 0.544412458  | 0.007487801 |
| ENSG00000149809 | TM7SF2   | -0.538699981 | 0.007525097 |
| ENSG00000188529 | SRSF10   | -0.434248664 | 0.007563363 |
| ENSG00000140807 | NKD1     | 1.233724958  | 0.00758644  |
| ENSG00000105722 | ERF      | -0.576947878 | 0.00758644  |
| ENSG00000139163 | ETNK1    | 0.516094283  | 0.007616156 |
| ENSG00000106610 | STAG3L4  | -0.428683335 | 0.007623706 |
| ENSG00000205808 | PLPP6    | 0.964355791  | 0.007644434 |
| ENSG00000269318 |          | -1.178182003 | 0.007677121 |
| ENSG00000144848 | ATG3     | 0.433121761  | 0.007724529 |
| ENSG00000105373 | GLTSCR2  | -0.389688994 | 0.007744356 |
| ENSG00000179051 | RCC2     | -0.329498269 | 0.007778274 |
| ENSG00000128284 | APOL3    | 0.603843182  | 0.007778274 |
| ENSG00000239557 |          | -0.865559034 | 0.007801648 |
| ENSG00000174327 | SLC16A13 | 0.908652078  | 0.007801648 |
| ENSG00000224470 | ATXN1L   | -0.517587353 | 0.007832762 |
| ENSG00000168404 | MLKL     | 0.689418162  | 0.007841578 |
| ENSG00000182670 | TTC3     | -0.467301702 | 0.007905316 |

|                 |          |              |             |
|-----------------|----------|--------------|-------------|
| ENSG0000006704  | GTF2IRD1 | -1.532415753 | 0.007927114 |
| ENSG00000104412 | EMC2     | 0.459316077  | 0.007927114 |
| ENSG00000204713 | TRIM27   | 0.694329014  | 0.007954744 |
| ENSG00000095209 | TMEM38B  | -0.569408975 | 0.0079627   |
| ENSG0000004455  | AK2      | 0.453083729  | 0.007988757 |
| ENSG00000165355 | FBXO33   | -0.677448985 | 0.007988757 |
| ENSG00000125952 | MAX      | 0.319146789  | 0.00799144  |
| ENSG00000129351 | ILF3     | -0.352154832 | 0.00799144  |
| ENSG00000178700 | DHFR2    | 0.855561913  | 0.007994493 |
| ENSG00000110057 | UNC93B1  | 0.494228505  | 0.008027609 |
| ENSG00000086827 | ZW10     | 0.677287112  | 0.008052886 |
| ENSG00000144306 | SCRN3    | 0.568366155  | 0.008082109 |
| ENSG00000178127 | NDUFV2   | -0.848697106 | 0.00808596  |
| ENSG00000255198 | SNHG9    | -0.585482553 | 0.008097207 |
| ENSG00000104823 | ECH1     | 0.470772207  | 0.008126122 |
| ENSG00000261438 |          | 1.172591661  | 0.008140711 |
| ENSG00000106723 | SPIN1    | -0.348618896 | 0.008164994 |
| ENSG00000272047 | GTF2H5   | 0.450985627  | 0.008175599 |
| ENSG00000091129 | NRCAM    | -3.024302008 | 0.008199952 |
| ENSG00000106399 | RPA3     | 0.466299913  | 0.008202241 |
| ENSG00000091732 | ZC3HC1   | 0.398695686  | 0.008204437 |
| ENSG00000028310 | BRD9     | -0.270845366 | 0.008212617 |
| ENSG00000146072 | TNFRSF21 | -2.198826464 | 0.008234652 |
| ENSG00000278740 |          | -1.827269448 | 0.008247285 |
| ENSG00000185418 | TARSL2   | -0.48121706  | 0.00824743  |
| ENSG00000047579 | DTNBP1   | 0.422815436  | 0.008253783 |
| ENSG00000143845 | ETNK2    | -2.682277132 | 0.008254699 |
| ENSG00000075188 | NUP37    | 0.633313312  | 0.008264258 |
| ENSG00000159708 | LRRC36   | -1.063043861 | 0.008264258 |
| ENSG00000162402 | USP24    | -0.347743016 | 0.008293746 |
| ENSG00000138073 | PREB     | 0.623848643  | 0.008373587 |
| ENSG00000117139 | KDM5B    | -0.496434231 | 0.00837567  |
| ENSG00000168056 | LTBP3    | -0.717381812 | 0.008376262 |
| ENSG00000247853 |          | 1.070975403  | 0.008420772 |
| ENSG00000077380 | DYNC112  | 0.596898507  | 0.008467845 |
| ENSG00000187815 | ZFP69    | 0.647831988  | 0.008502705 |
| ENSG00000197021 | CXorf40B | -0.480413194 | 0.008516244 |
| ENSG00000259408 |          | -0.910479905 | 0.008516244 |
| ENSG00000102317 | RBM3     | -0.335360091 | 0.00853863  |
| ENSG00000182584 | ACTL10   | 1.260766808  | 0.008539241 |
| ENSG00000008128 | CDK11A   | -0.494094753 | 0.008551978 |
| ENSG00000183496 | MEX3B    | -1.139155318 | 0.008556313 |
| ENSG00000109519 | GRPEL1   | -0.388683272 | 0.008624469 |
| ENSG00000185100 | ADSSL1   | -0.617725868 | 0.008642763 |
| ENSG00000136213 | CHST12   | 0.64795469   | 0.008738581 |
| ENSG00000109062 | SLC9A3R1 | -0.602428679 | 0.008744899 |
| ENSG00000108946 | PRKAR1A  | 0.462731826  | 0.008756258 |
| ENSG00000139687 | RB1      | 0.434396005  | 0.008773943 |

|                 |          |              |             |
|-----------------|----------|--------------|-------------|
| ENSG00000279549 |          | -0.859289043 | 0.008833802 |
| ENSG00000173457 | PPP1R14B | -0.731435393 | 0.008833802 |
| ENSG00000150337 | FCGR1A   | 1.211071648  | 0.008875534 |
| ENSG00000198026 | ZNF335   | -0.283195661 | 0.008875534 |
| ENSG00000124641 | MED20    | 0.760162398  | 0.008876664 |
| ENSG00000177565 | TBL1XR1  | -0.469048301 | 0.009054239 |
| ENSG00000254858 | MPV17L2  | -0.600213453 | 0.009068432 |
| ENSG00000145945 | FAM50B   | 0.832261192  | 0.009078325 |
| ENSG00000038382 | TRIO     | -0.539720477 | 0.009125796 |
| ENSG00000168016 | TRANK1   | 0.682928547  | 0.009132193 |
| ENSG00000161653 | NAGS     | 0.925107721  | 0.009144376 |
| ENSG00000115457 | IGFBP2   | 1.481886829  | 0.009149893 |
| ENSG00000100068 | LRP5L    | -0.552160339 | 0.009149893 |
| ENSG00000231528 | FAM225A  | 1.220437677  | 0.009191262 |
| ENSG00000162777 | DENND2D  | 0.778766002  | 0.009241897 |
| ENSG00000145390 | USP53    | -1.204775386 | 0.009245362 |
| ENSG00000096968 | JAK2     | 0.548986531  | 0.009268721 |
| ENSG00000100372 | SLC25A17 | 0.460522789  | 0.0092832   |
| ENSG00000153560 | UBP1     | 0.345028817  | 0.009317584 |
| ENSG00000197147 | LRRC8B   | -0.615159877 | 0.009322388 |
| ENSG00000235725 |          | -0.718634839 | 0.009325558 |
| ENSG00000113263 | ITK      | -1.050194582 | 0.009330516 |
| ENSG00000102760 | RGCC     | -1.435156318 | 0.009341918 |
| ENSG00000099834 | CDHR5    | 1.298712698  | 0.009352147 |
| ENSG00000120686 | UFM1     | -0.284504998 | 0.009375994 |
| ENSG00000134882 | UBAC2    | 0.322924845  | 0.009386229 |
| ENSG00000179409 | GEMIN4   | -0.410793182 | 0.009399867 |
| ENSG00000213609 | RPL7AP50 | -0.909015854 | 0.009421707 |
| ENSG00000132196 | HSD17B7  | 0.631485767  | 0.009426284 |
| ENSG00000204209 | DAXX     | 0.670188983  | 0.009472685 |
| ENSG00000166747 | AP1G1    | -0.497675827 | 0.009472685 |
| ENSG00000175643 | RMI2     | 1.431612797  | 0.009514466 |
| ENSG00000186469 | GNG2     | -0.477545054 | 0.009532333 |
| ENSG00000118496 | FBXO30   | -0.576723397 | 0.009567051 |
| ENSG00000174010 | KLHL15   | -0.679360378 | 0.009661858 |
| ENSG00000145780 | FEM1C    | -0.747152598 | 0.009691069 |
| ENSG00000144749 | LRIG1    | -0.587848604 | 0.009697198 |
| ENSG00000111875 | ASF1A    | 0.645695143  | 0.009697198 |
| ENSG00000278231 |          | -0.6997846   | 0.009697198 |
| ENSG00000143376 | SNX27    | 0.482786415  | 0.009788204 |
| ENSG00000237063 |          | -1.48372325  | 0.009794862 |
| ENSG00000102524 | TNFSF13B | 0.965208442  | 0.009847153 |
| ENSG00000133466 | C1QTNF6  | -0.727627648 | 0.009847153 |
| ENSG00000273216 |          | -1.216175178 | 0.009889719 |
| ENSG00000100664 | EIF5     | -0.472451271 | 0.009904268 |
| ENSG00000249992 | TMEM158  | -2.37050781  | 0.009913004 |
| ENSG00000173812 | EIF1     | -0.369588335 | 0.009917353 |
| ENSG00000101945 | SUV39H1  | -0.568441761 | 0.009941305 |

|                 |           |              |             |
|-----------------|-----------|--------------|-------------|
| ENSG00000165688 | PMPCA     | -0.295800822 | 0.009941305 |
| ENSG00000065427 | KARS      | 0.320291728  | 0.009965087 |
| ENSG00000048405 | ZNF800    | -0.464089494 | 0.010007767 |
| ENSG00000183647 | ZNF530    | -0.557820525 | 0.010011142 |
| ENSG00000187626 | ZKSCAN4   | 0.830452673  | 0.010033703 |
| ENSG00000072422 | RHOBTB1   | -1.338649265 | 0.010033703 |
| ENSG00000015479 | MATR3     | -0.640899689 | 0.010082307 |
| ENSG00000010278 | CD9       | -1.522380008 | 0.010088354 |
| ENSG00000152464 | RPP38     | 0.447056634  | 0.010115254 |
| ENSG00000119599 | DCAF4     | -0.578034756 | 0.010133434 |
| ENSG00000155189 | AGPAT5    | 0.653363719  | 0.010135705 |
| ENSG00000198517 | MAFK      | -0.583097787 | 0.010144413 |
| ENSG00000272106 |           | -0.418522363 | 0.010157658 |
| ENSG00000232119 | MCTS1     | 0.49497145   | 0.010157658 |
| ENSG00000170439 | METTL7B   | 1.789405787  | 0.010157658 |
| ENSG00000144597 | EAF1      | -0.715351769 | 0.010176749 |
| ENSG00000151882 | CCL28     | -0.807333765 | 0.01023727  |
| ENSG00000167333 | TRIM68    | 0.623735924  | 0.01023727  |
| ENSG00000123700 | KCNJ2     | 1.65275555   | 0.01023727  |
| ENSG00000100426 | ZBED4     | -0.300306997 | 0.01023727  |
| ENSG00000176024 | ZNF613    | 0.998190702  | 0.010246726 |
| ENSG00000235750 | KIAA0040  | 0.831901698  | 0.010248203 |
| ENSG00000184371 | CSF1      | -1.629885219 | 0.010278565 |
| ENSG00000139725 | RHOF      | -0.402502424 | 0.010278565 |
| ENSG00000157350 | ST3GAL2   | 0.408521934  | 0.010278565 |
| ENSG00000139291 | TMEM19    | 0.453262504  | 0.010295546 |
| ENSG00000261490 |           | -0.642723177 | 0.010304765 |
| ENSG00000281205 | LINC00950 | -0.887529522 | 0.010322056 |
| ENSG00000112079 | STK38     | 0.48621714   | 0.010402968 |
| ENSG00000130396 | AFDN      | -0.963852482 | 0.010417731 |
| ENSG00000112078 | KCTD20    | -0.319183335 | 0.010431422 |
| ENSG00000183665 | TRMT12    | 0.548340864  | 0.010530936 |
| ENSG00000151490 | PTPRO     | 0.691981945  | 0.010551545 |
| ENSG00000140450 | ARRDC4    | -0.956157033 | 0.010576656 |
| ENSG00000091157 | WDR7      | 0.366367055  | 0.010576656 |
| ENSG00000227467 | LINC01537 | -1.124694812 | 0.010578054 |
| ENSG00000118257 | NRP2      | -1.106177452 | 0.010661371 |
| ENSG00000115275 | MOGS      | 0.405759171  | 0.010747452 |
| ENSG00000110987 | BCL7A     | -0.877960362 | 0.010750973 |
| ENSG00000101247 | NDUFAF5   | -0.669208234 | 0.01076466  |
| ENSG00000124181 | PLCG1     | -0.822056331 | 0.01076466  |
| ENSG00000078061 | ARAF      | -0.297340064 | 0.010765021 |
| ENSG00000112394 | SLC16A10  | -1.026965917 | 0.010772781 |
| ENSG00000175606 | TMEM70    | -0.510251453 | 0.010772781 |
| ENSG00000143498 | TAF1A     | 0.801410434  | 0.010783983 |
| ENSG00000279192 | PWAR5     | -1.023472312 | 0.010799938 |
| ENSG00000204611 | ZNF616    | 0.937894905  | 0.01085223  |
| ENSG00000106560 | GIMAP2    | 0.715697116  | 0.010863459 |

|                 |           |              |             |
|-----------------|-----------|--------------|-------------|
| ENSG00000117859 | OSBPL9    | 0.329513527  | 0.010922631 |
| ENSG00000184678 | HIST2H2BE | 0.645713919  | 0.010929579 |
| ENSG00000105576 | TNPO2     | -0.269337665 | 0.010929579 |
| ENSG00000165685 | TMEM52B   | -1.376651884 | 0.010943869 |
| ENSG00000111913 | FAM65B    | 0.677645283  | 0.010947176 |
| ENSG00000139793 | MBNL2     | -0.532411004 | 0.010947176 |
| ENSG00000215021 | PHB2      | -0.238456254 | 0.011030923 |
| ENSG00000152128 | TMEM163   | -2.723328171 | 0.011040311 |
| ENSG00000196470 | SIAH1     | -0.608044219 | 0.011040311 |
| ENSG00000149646 | CNBD2     | -0.587721586 | 0.011052374 |
| ENSG00000136827 | TOR1A     | 0.453389956  | 0.01114214  |
| ENSG00000274677 |           | -1.103887622 | 0.011217764 |
| ENSG00000135047 | CTSL      | -2.178937835 | 0.011237565 |
| ENSG00000224861 | YBX1P1    | -0.494580126 | 0.011255946 |
| ENSG00000241878 | PISD      | 0.330863577  | 0.011268269 |
| ENSG00000093072 | CECR1     | 0.507576421  | 0.011278599 |
| ENSG00000172575 | RASGRP1   | -1.301316005 | 0.01132234  |
| ENSG00000120616 | EPC1      | -0.306413322 | 0.011395791 |
| ENSG00000205302 | SNX2      | 0.348213872  | 0.011481776 |
| ENSG00000108448 | TRIM16L   | -0.84121242  | 0.011533686 |
| ENSG00000188981 | MSANTD1   | -0.744405338 | 0.011533869 |
| ENSG00000118777 | ABCG2     | -2.444714128 | 0.011536587 |
| ENSG00000130844 | ZNF331    | -1.743897304 | 0.011617529 |
| ENSG00000138686 | BBS7      | 0.564508275  | 0.011621882 |
| ENSG00000134900 | TPP2      | -0.342898367 | 0.011621882 |
| ENSG00000140993 | TIGD7     | 0.827536126  | 0.011621882 |
| ENSG00000279207 |           | -0.836447548 | 0.011621882 |
| ENSG00000169093 | ASMTL     | -0.435371444 | 0.01164282  |
| ENSG00000204136 | GGTA1P    | -1.223767944 | 0.01164282  |
| ENSG00000196659 | TTC30B    | 0.89732534   | 0.011718918 |
| ENSG00000197093 | GAL3ST4   | -1.1693339   | 0.011718918 |
| ENSG00000146833 | TRIM4     | 0.453707808  | 0.011735899 |
| ENSG00000104518 | GSDMD     | 0.590236684  | 0.011750986 |
| ENSG00000196696 |           | -0.407097022 | 0.011750986 |
| ENSG00000041988 | THAP3     | 0.560838981  | 0.011789126 |
| ENSG00000013288 | MAN2B2    | 0.320791342  | 0.011789126 |
| ENSG00000081087 | OSTM1     | 0.422499163  | 0.011789126 |
| ENSG00000156603 | MED19     | 0.558642716  | 0.011789126 |
| ENSG00000152380 | FAM151B   | 0.543876658  | 0.011813668 |
| ENSG00000204475 | NCR3      | -2.498914882 | 0.011826822 |
| ENSG00000067369 | TP53BP1   | -0.380611487 | 0.01192734  |
| ENSG00000132581 | SDF2      | 0.302887083  | 0.01192734  |
| ENSG00000183458 |           | -0.856682685 | 0.011929794 |
| ENSG00000125746 | EML2      | 0.371447771  | 0.011935647 |
| ENSG00000112308 | C6orf62   | 0.30896216   | 0.011970858 |
| ENSG00000115020 | PIKFYVE   | -0.356137488 | 0.01199274  |
| ENSG00000119138 | KLF9      | -0.742522499 | 0.012099882 |
| ENSG00000196531 | NACA      | -0.245553903 | 0.012099882 |

|                 |           |              |             |
|-----------------|-----------|--------------|-------------|
| ENSG00000170604 | IRF2BP1   | 0.504883852  | 0.012099882 |
| ENSG00000100483 | VCPKMT    | -0.475667155 | 0.012100588 |
| ENSG00000137955 | RABGGTB   | -0.365197339 | 0.012145751 |
| ENSG00000277476 |           | -0.537037296 | 0.012170216 |
| ENSG00000174233 | ADCY6     | -0.830295385 | 0.012191169 |
| ENSG00000251867 |           | -0.74901416  | 0.012202945 |
| ENSG00000008710 | PKD1      | -0.447959481 | 0.012202945 |
| ENSG00000139921 | TMX1      | 0.52794344   | 0.012204141 |
| ENSG00000277449 | CEBPB-AS1 | -0.797850142 | 0.012204141 |
| ENSG00000181315 | ZNF322    | 0.920967052  | 0.012229476 |
| ENSG00000089280 | FUS       | -0.355957161 | 0.012231404 |
| ENSG00000196345 | ZKSCAN7   | 1.007529486  | 0.0122611   |
| ENSG00000279117 |           | -0.406535152 | 0.012270469 |
| ENSG00000214485 | RPL7P1    | -0.608025118 | 0.012301001 |
| ENSG00000219545 | UMAD1     | 0.475322536  | 0.012306459 |
| ENSG00000143575 | HAX1      | 0.328578358  | 0.012327035 |
| ENSG00000232573 | RPL3P4    | -0.418728312 | 0.01237718  |
| ENSG00000183161 | FANCF     | 0.79330166   | 0.012401158 |
| ENSG00000276533 |           | 0.713304183  | 0.012410119 |
| ENSG00000140948 | ZCCHC14   | -0.590063404 | 0.012447972 |
| ENSG00000196365 | LONP1     | -0.38267872  | 0.012447972 |
| ENSG00000162889 | MAPKAPK2  | -0.587050588 | 0.012454704 |
| ENSG00000165244 | ZNF367    | -1.002459455 | 0.012461018 |
| ENSG00000153944 | MSI2      | -0.318068756 | 0.012461018 |
| ENSG00000197063 | MAFG      | -0.544762284 | 0.012486792 |
| ENSG00000100403 | ZC3H7B    | 0.284880562  | 0.012486792 |
| ENSG00000277496 |           | 0.827818263  | 0.012508718 |
| ENSG00000100644 | HIF1A     | -0.88007474  | 0.012556536 |
| ENSG00000168502 | MTCL1     | -2.142307464 | 0.012604929 |
| ENSG00000205581 | HMGN1     | -0.368462064 | 0.012690892 |
| ENSG00000166716 | ZNF592    | -0.293002161 | 0.012692246 |
| ENSG00000154124 | OTULIN    | -0.327974652 | 0.012748744 |
| ENSG00000165533 | TTC8      | -0.562079816 | 0.012748744 |
| ENSG00000127152 | BCL11B    | -1.647259628 | 0.012779145 |
| ENSG00000177352 | CCDC71    | 0.562554646  | 0.012842984 |
| ENSG00000146425 | DYNLT1    | 0.714478222  | 0.012842984 |
| ENSG00000268043 | NBPF12    | -0.355930753 | 0.012863886 |
| ENSG00000105202 | FBL       | -0.267343811 | 0.012898705 |
| ENSG00000164056 | SPRY1     | -1.454047617 | 0.012936938 |
| ENSG00000173295 | FAM86B3P  | -0.706379014 | 0.012936938 |
| ENSG00000101298 | SNPH      | -1.216655006 | 0.012936938 |
| ENSG00000184787 | UBE2G2    | -0.341447667 | 0.012936938 |
| ENSG00000162408 | NOL9      | -0.448479554 | 0.012966884 |
| ENSG00000244560 |           | -0.716927664 | 0.012966884 |
| ENSG00000272760 |           | 0.734128768  | 0.012966884 |
| ENSG00000153902 | LGI4      | -1.311523116 | 0.012966884 |
| ENSG00000276337 |           | -1.258948073 | 0.012971689 |
| ENSG00000273658 |           | -1.212536159 | 0.012983829 |

|                 |          |              |             |
|-----------------|----------|--------------|-------------|
| ENSG00000132471 | WBP2     | 0.229871493  | 0.012988148 |
| ENSG00000170260 | ZNF212   | -0.502397834 | 0.013038051 |
| ENSG00000275769 |          | -2.783833153 | 0.013038051 |
| ENSG00000158427 | TMSB15B  | -1.06668155  | 0.013066616 |
| ENSG00000187514 | PTMA     | -0.298954347 | 0.013087953 |
| ENSG00000227066 |          | -1.020536245 | 0.01310982  |
| ENSG00000107833 | NPM3     | -0.608106035 | 0.01310982  |
| ENSG00000167978 | SRRM2    | -0.332279508 | 0.01310982  |
| ENSG00000108469 | RECQL5   | 0.442638305  | 0.01310982  |
| ENSG00000259891 |          | -0.7009997   | 0.013127815 |
| ENSG00000152409 | JMY      | -0.882788541 | 0.013132208 |
| ENSG00000079134 | THOC1    | -0.334198976 | 0.013132208 |
| ENSG00000270681 |          | -1.419972593 | 0.013162596 |
| ENSG00000137364 | TPMT     | 0.453440486  | 0.013162596 |
| ENSG00000143653 | SCCPDH   | 0.562189773  | 0.013198334 |
| ENSG00000112200 | ZNF451   | -0.362848586 | 0.013198334 |
| ENSG00000165233 | CARD19   | -0.402622244 | 0.013198334 |
| ENSG00000167778 | SPRYD3   | 0.572969903  | 0.013198334 |
| ENSG00000184990 | SIVA1    | -0.356671344 | 0.013198334 |
| ENSG00000150593 | PDCD4    | -0.483243738 | 0.013204388 |
| ENSG00000136450 | SRSF1    | 0.448100213  | 0.013204388 |
| ENSG00000196557 | CACNA1H  | -2.727503936 | 0.013207141 |
| ENSG00000119812 | FAM98A   | 0.492063613  | 0.013250187 |
| ENSG00000025708 | TYMP     | 1.096598581  | 0.01332707  |
| ENSG00000100342 | APOL1    | 0.903648657  | 0.013351339 |
| ENSG00000253982 |          | -0.658066466 | 0.013360943 |
| ENSG00000115364 | MRPL19   | 0.561757287  | 0.013366095 |
| ENSG00000101882 | NKAP     | 0.388363916  | 0.013366095 |
| ENSG00000133195 | SLC39A11 | 0.494487776  | 0.013366095 |
| ENSG00000066379 | ZNRD1    | 0.445468328  | 0.013381335 |
| ENSG00000167103 | PIP5KL1  | -1.239645214 | 0.013381335 |
| ENSG00000166130 | IKBIP    | 0.665234519  | 0.013381335 |
| ENSG00000182400 | TRAPPC6B | 0.622586916  | 0.013381335 |
| ENSG00000187775 | DNAH17   | -1.864960928 | 0.013381335 |
| ENSG00000173818 | ENDOV    | -0.427237977 | 0.013381335 |
| ENSG00000100393 | EP300    | -0.357179355 | 0.013381335 |
| ENSG00000146054 | TRIM7    | 0.677035115  | 0.013506502 |
| ENSG00000131849 | ZNF132   | 1.22111034   | 0.013517549 |
| ENSG00000198815 | FOXJ3    | -0.273636812 | 0.013529208 |
| ENSG00000196338 | NLGN3    | -1.01818573  | 0.013529208 |
| ENSG00000196233 | LCOR     | -0.366372468 | 0.013529208 |
| ENSG00000278991 |          | -1.07672584  | 0.013529208 |
| ENSG00000076604 | TRAF4    | -0.905454061 | 0.013529208 |
| ENSG00000181894 | ZNF329   | -0.554832158 | 0.013529208 |
| ENSG00000075415 | SLC25A3  | -0.408499397 | 0.013534613 |
| ENSG00000261338 |          | -0.629625597 | 0.013570525 |
| ENSG00000141002 | TCF25    | -0.342872017 | 0.013570525 |
| ENSG00000143553 | SNAPIN   | 0.536914722  | 0.013653919 |



|                 |         |              |             |
|-----------------|---------|--------------|-------------|
| ENSG00000165410 | CFL2    | -0.774062258 | 0.013662343 |
| ENSG00000169967 | MAP3K2  | -0.439452057 | 0.013703788 |
| ENSG00000054967 | RELT    | -0.609656103 | 0.013767028 |
| ENSG00000100815 | TRIP11  | 0.562917154  | 0.013800363 |
| ENSG00000180257 | ZNF816  | 0.653206163  | 0.013800363 |
| ENSG00000162396 | PARS2   | 1.245998393  | 0.013850874 |
| ENSG00000152520 | PAN3    | -0.287241218 | 0.013850874 |
| ENSG00000214706 | IFRD2   | -0.385211141 | 0.013957369 |
| ENSG00000162636 | FAM102B | -0.53908749  | 0.01396362  |
| ENSG00000114209 | PDCD10  | 0.410498599  | 0.013976783 |
| ENSG00000147526 | TACC1   | -0.474504481 | 0.013976783 |
| ENSG00000256087 | ZNF432  | -0.417329495 | 0.013976783 |
| ENSG00000160211 | G6PD    | 0.371185381  | 0.013986122 |
| ENSG00000177989 | ODF3B   | 1.009484678  | 0.014039564 |
| ENSG00000196776 | CD47    | 0.283130588  | 0.014079474 |
| ENSG00000156928 | MALSU1  | 0.48104448   | 0.014079758 |
| ENSG00000165406 | Mar-08  | -0.354790928 | 0.014079758 |
| ENSG00000107566 | ERLIN1  | 0.631271191  | 0.014079758 |
| ENSG00000201457 | SNORA55 | -1.032818426 | 0.014086115 |
| ENSG00000115085 | ZAP70   | -1.171039532 | 0.014153528 |
| ENSG00000033867 | SLC4A7  | -0.452615794 | 0.014153528 |
| ENSG00000211445 | GPX3    | -1.280226968 | 0.014153528 |
| ENSG00000205352 | PRR13   | 0.271583641  | 0.014202401 |
| ENSG00000260841 | NA      | -0.480733308 | 0.014204917 |
| ENSG00000106443 | PHF14   | 0.35178097   | 0.014204917 |
| ENSG00000125772 | GPCPD1  | -0.503125267 | 0.014204917 |
| ENSG00000163435 | ELF3    | -0.584877662 | 0.014243064 |
| ENSG00000145723 | GIN1    | 0.85850129   | 0.014285957 |
| ENSG00000101138 | CSTF1   | 0.443844066  | 0.014297384 |
| ENSG00000149823 | VPS51   | -0.296110127 | 0.014319643 |
| ENSG00000178053 | MLF1    | -1.419331224 | 0.014330984 |
| ENSG00000113621 | TXNDC15 | 0.461729007  | 0.014330984 |
| ENSG00000170234 | PWWP2A  | 0.405766737  | 0.014330984 |
| ENSG00000109787 | KLF3    | -0.524085349 | 0.014352391 |
| ENSG00000147475 | ERLIN2  | 0.318722922  | 0.014352391 |
| ENSG00000092208 | GEMIN2  | 0.45546431   | 0.014352391 |
| ENSG00000126775 | ATG14   | -0.352099688 | 0.014352391 |
| ENSG00000172116 | CD8B    | -1.5979435   | 0.014407037 |
| ENSG00000056050 | HPF1    | 0.699403302  | 0.014407037 |
| ENSG00000172508 | CARNS1  | -1.569932352 | 0.014407037 |
| ENSG00000279133 |         | -0.728822529 | 0.01440922  |
| ENSG00000141985 | SH3GL1  | -0.449249752 | 0.01440922  |
| ENSG00000254503 |         | 1.164722053  | 0.01440922  |
| ENSG00000167635 | ZNF146  | 0.504505586  | 0.014438476 |
| ENSG00000169914 | OTUD3   | -0.383907543 | 0.014587647 |
| ENSG00000198286 | CARD11  | -1.184279797 | 0.014587647 |
| ENSG00000131196 | NFATC1  | -0.31592961  | 0.014587647 |
| ENSG00000105617 | LENG1   | 0.498513414  | 0.014668496 |

|                 |           |              |             |
|-----------------|-----------|--------------|-------------|
| ENSG0000073111  | MCM2      | -1.217496771 | 0.014680098 |
| ENSG00000146834 | MEPCE     | -0.527876321 | 0.014737818 |
| ENSG00000115165 | CYTIP     | -0.551921761 | 0.014783838 |
| ENSG00000108433 | GOSR2     | 0.346541467  | 0.014797495 |
| ENSG00000165782 | TMEM55B   | -0.363227789 | 0.014829124 |
| ENSG00000280434 |           | -0.655165894 | 0.0148399   |
| ENSG00000135249 | RINT1     | -0.369045954 | 0.014861567 |
| ENSG00000197265 | GTF2E2    | 0.35479877   | 0.014861567 |
| ENSG00000103269 | RHBDL1    | -1.089234066 | 0.014861567 |
| ENSG00000169715 | MT1E      | 1.923426191  | 0.014861567 |
| ENSG00000141034 | GID4      | 0.58593624   | 0.014861567 |
| ENSG00000165792 | METTL17   | 0.449008687  | 0.014906342 |
| ENSG00000164292 | RHOBTB3   | -1.188525264 | 0.014949876 |
| ENSG00000006576 | PHTF2     | -0.332669249 | 0.014967093 |
| ENSG00000099364 | FBXL19    | 0.382539547  | 0.015011333 |
| ENSG00000162438 | CTRC      | -0.894067243 | 0.015034065 |
| ENSG00000168026 | TTC21A    | 0.755254097  | 0.015056522 |
| ENSG00000172530 | BANP      | -0.307086928 | 0.015087612 |
| ENSG00000136244 | IL6       | 2.590540282  | 0.01512651  |
| ENSG00000269892 |           | -0.911853643 | 0.015157579 |
| ENSG00000186594 | MIR22HG   | -0.864102324 | 0.015157579 |
| ENSG00000112787 | FBRSL1    | -0.343267063 | 0.015184556 |
| ENSG00000175866 | BAIAP2    | -0.524368835 | 0.015184556 |
| ENSG00000128602 | SMO       | -1.864855503 | 0.015188495 |
| ENSG00000082153 | BZW1      | -0.478794844 | 0.015203847 |
| ENSG00000144711 | IQSEC1    | -0.391513738 | 0.015203847 |
| ENSG00000247240 | UBL7-AS1  | -0.556858484 | 0.015223055 |
| ENSG00000177628 | GBA       | 0.496043523  | 0.015233323 |
| ENSG00000107882 | SUFU      | 0.420421845  | 0.015283168 |
| ENSG00000279432 |           | -0.836283367 | 0.015299171 |
| ENSG00000187257 | RSBN1L    | 0.48697984   | 0.015333163 |
| ENSG00000100401 | RANGAP1   | 0.389883935  | 0.015333163 |
| ENSG00000164080 | RAD54L2   | -0.291551856 | 0.015356081 |
| ENSG00000279838 |           | -0.787304177 | 0.015368636 |
| ENSG00000085721 | RRN3      | -0.493160874 | 0.015368636 |
| ENSG00000180423 | HARBI1    | 0.601878338  | 0.015536786 |
| ENSG00000100554 | ATP6V1D   | 0.572694094  | 0.01554846  |
| ENSG00000092929 | UNC13D    | 0.340610142  | 0.01554846  |
| ENSG00000204439 | C6orf47   | 0.526600757  | 0.015572591 |
| ENSG00000155792 | DEPTOR    | -1.398433478 | 0.015572591 |
| ENSG00000141076 | UTP4      | -0.392375392 | 0.015674991 |
| ENSG00000141622 | RNF165    | 1.589739775  | 0.015683446 |
| ENSG00000008513 | ST3GAL1   | -0.431940148 | 0.01569281  |
| ENSG00000111727 | HCFC2     | 0.456527358  | 0.015701377 |
| ENSG00000183506 | PI4KAP2   | -0.476137755 | 0.015701377 |
| ENSG00000259494 | MRPL46    | 0.504004711  | 0.015811742 |
| ENSG00000088854 | C20orf194 | -0.39912825  | 0.015811742 |
| ENSG00000118961 | LDAH      | 0.602369807  | 0.015819751 |

|                 |           |              |             |
|-----------------|-----------|--------------|-------------|
| ENSG00000182903 | ZNF721    | 0.545309845  | 0.015819751 |
| ENSG00000175137 | SH3BP5L   | 0.476062016  | 0.015822188 |
| ENSG00000172086 | KRCC1     | 0.664240453  | 0.015838878 |
| ENSG00000110367 | DDX6      | -0.376656154 | 0.015839532 |
| ENSG00000185864 | NPIP4     | -0.503199348 | 0.015839532 |
| ENSG00000265531 | FCGR1CP   | 1.559938605  | 0.015942793 |
| ENSG00000121966 | CXCR4     | -0.721284059 | 0.015946357 |
| ENSG00000180346 | TIGD2     | 0.531875458  | 0.015955515 |
| ENSG00000198938 | MT-CO3    | -0.395812053 | 0.015966379 |
| ENSG00000163704 | PRRT3     | -0.786552177 | 0.016048822 |
| ENSG00000153140 | CETN3     | 0.852668901  | 0.016048822 |
| ENSG00000213024 | NUP62     | 0.40494672   | 0.016048893 |
| ENSG00000181274 | FRAT2     | 0.507284178  | 0.016066377 |
| ENSG00000129484 | PARP2     | -0.491812875 | 0.016066377 |
| ENSG00000181826 | RELL1     | -0.809059904 | 0.016088239 |
| ENSG00000136699 | SMPD4     | -0.382473078 | 0.016115153 |
| ENSG00000073464 | CLCN4     | 1.161370092  | 0.016127645 |
| ENSG00000001084 | GCLC      | -0.323747123 | 0.016133034 |
| ENSG00000272918 |           | -0.838623919 | 0.016133034 |
| ENSG00000111319 | SCNN1A    | -0.721269728 | 0.016166711 |
| ENSG00000158417 | EIF5B     | 0.362855097  | 0.01618331  |
| ENSG00000181218 | HIST3H2A  | -1.062291012 | 0.016201031 |
| ENSG00000164967 | RPP25L    | 0.683096893  | 0.016201031 |
| ENSG00000111011 | RSRC2     | -0.467810704 | 0.016201031 |
| ENSG00000279800 | BCLAF1P2  | -0.768592816 | 0.016201031 |
| ENSG00000204642 | HLA-F     | 0.407509896  | 0.016202203 |
| ENSG00000224691 |           | -0.692950384 | 0.016204193 |
| ENSG00000075142 | SRI       | 0.304042721  | 0.016211066 |
| ENSG00000120875 | DUSP4     | -2.801239695 | 0.016211066 |
| ENSG00000125844 | RRBP1     | 0.509592582  | 0.016211066 |
| ENSG00000070413 | DGCR2     | 0.326921561  | 0.016211066 |
| ENSG00000052723 | SIKE1     | 0.432385534  | 0.016239577 |
| ENSG00000236383 | LINC00854 | -1.266444916 | 0.016239577 |
| ENSG00000165118 | C9orf64   | 0.919741941  | 0.016293021 |
| ENSG00000083845 | RPS5      | -0.354023185 | 0.016314733 |
| ENSG00000164169 | PRMT9     | -0.587412348 | 0.016322974 |
| ENSG00000139131 | YARS2     | 0.465530113  | 0.016322974 |
| ENSG00000158792 | SPATA2L   | -0.705919474 | 0.016394691 |
| ENSG00000184203 | PPP1R2    | -0.36902068  | 0.016416068 |
| ENSG00000102316 | MAGED2    | 0.33833894   | 0.016416068 |
| ENSG00000103769 | RAB11A    | 0.321496808  | 0.016416068 |
| ENSG00000100650 | SRSF5     | -0.3209159   | 0.016506382 |
| ENSG00000206337 | HCP5      | 0.664002815  | 0.016509227 |
| ENSG00000130203 | APOE      | -1.091477713 | 0.01654814  |
| ENSG00000172059 | KLF11     | -0.580138614 | 0.016631185 |
| ENSG00000114166 | KAT2B     | 0.429569703  | 0.016662525 |
| ENSG00000259820 |           | -0.734705549 | 0.016669246 |
| ENSG00000148090 | AUH       | 0.439576971  | 0.016669246 |

|                 |           |              |             |
|-----------------|-----------|--------------|-------------|
| ENSG00000269952 |           | -2.270043005 | 0.016669246 |
| ENSG00000167775 | CD320     | -0.737987358 | 0.016669246 |
| ENSG00000116273 | PHF13     | -0.992391385 | 0.016718381 |
| ENSG00000185127 | C6orf120  | 0.400926239  | 0.016747397 |
| ENSG00000141497 | ZMYND15   | -0.970023821 | 0.016821327 |
| ENSG00000076382 | SPAG5     | -1.03583025  | 0.01685969  |
| ENSG00000116918 | TSNAX     | 0.440886285  | 0.01688591  |
| ENSG00000141096 | DPEP3     | -0.833567185 | 0.01688591  |
| ENSG00000104885 | DOT1L     | -0.567206574 | 0.01688591  |
| ENSG00000131876 | SNRPA1    | -0.389797323 | 0.017032617 |
| ENSG00000121104 | FAM117A   | 0.508247772  | 0.017054741 |
| ENSG00000178732 | GP5       | -1.670959392 | 0.017196185 |
| ENSG00000196418 | ZNF124    | -0.414075236 | 0.017198039 |
| ENSG00000102710 | SUPT20H   | 0.483292986  | 0.017198039 |
| ENSG00000100811 | YY1       | -0.207518234 | 0.017260482 |
| ENSG00000261685 | NA        | 1.491706019  | 0.017260482 |
| ENSG00000141376 | BCAS3     | 0.375653053  | 0.017421961 |
| ENSG00000157045 | NTAN1     | -0.60119083  | 0.017436953 |
| ENSG00000136504 | KAT7      | -0.406352366 | 0.017453075 |
| ENSG00000184047 | DIABLO    | -0.634296834 | 0.017610596 |
| ENSG00000100567 | PSMA3     | 0.40580712   | 0.017610596 |
| ENSG00000015285 | WAS       | 0.258870058  | 0.017631433 |
| ENSG00000073670 | ADAM11    | -0.961329301 | 0.017631433 |
| ENSG00000125691 | RPL23     | -0.310335703 | 0.017639457 |
| ENSG00000113638 | TTC33     | 0.544562689  | 0.017646198 |
| ENSG00000185024 | BRF1      | -0.309783019 | 0.017646198 |
| ENSG00000245869 |           | -2.616566371 | 0.017656779 |
| ENSG00000241769 | LINC00893 | -0.515825387 | 0.017682945 |
| ENSG00000068878 | PSME4     | -0.45453494  | 0.017683265 |
| ENSG00000213862 |           | -0.370541885 | 0.017683265 |
| ENSG00000177335 | C8orf31   | 0.970464927  | 0.017695275 |
| ENSG00000253276 | CCDC71L   | -0.732688117 | 0.017719143 |
| ENSG00000120159 | CAAP1     | 0.289611932  | 0.017719143 |
| ENSG00000196139 | AKR1C3    | -1.517936562 | 0.017823028 |
| ENSG00000207110 | RNU1-106P | -1.622779758 | 0.017839783 |
| ENSG00000031691 | CENPQ     | 0.864436863  | 0.017857698 |
| ENSG00000176386 | CDC26     | 0.352377835  | 0.017857698 |
| ENSG00000140612 | SEC11A    | -0.309039911 | 0.017908005 |
| ENSG00000169583 | CLIC3     | -2.705800289 | 0.018009952 |
| ENSG00000116337 | AMPD2     | -0.477601392 | 0.018027739 |
| ENSG00000142959 | BEST4     | -1.417811575 | 0.018040328 |
| ENSG00000013306 | SLC25A39  | -0.286106099 | 0.018071353 |
| ENSG00000183340 | JRKL      | 0.738512202  | 0.018090103 |
| ENSG00000074416 | MGLL      | -1.363793381 | 0.018108106 |
| ENSG00000176407 | KCMF1     | -0.265092854 | 0.018167301 |
| ENSG00000141971 | MVB12A    | 0.440618437  | 0.018167301 |
| ENSG00000266094 | RASSF5    | -0.337812271 | 0.018193693 |
| ENSG00000136720 | HS6ST1    | -0.547600452 | 0.018234834 |

|                 |           |              |             |
|-----------------|-----------|--------------|-------------|
| ENSG00000167491 | GATAD2A   | -0.271224717 | 0.018234834 |
| ENSG00000269688 |           | -0.582097789 | 0.018234834 |
| ENSG00000273951 |           | -1.029545713 | 0.01824163  |
| ENSG00000118816 | CCNI      | -0.237801867 | 0.018256937 |
| ENSG00000266962 |           | 0.680920342  | 0.018288538 |
| ENSG00000213757 |           | -0.564540219 | 0.018301577 |
| ENSG00000167468 | GPX4      | -0.408200023 | 0.018310337 |
| ENSG00000109065 | NAT9      | -0.429676626 | 0.018317588 |
| ENSG00000171566 | PLRG1     | 0.358582197  | 0.018364614 |
| ENSG00000173991 | TCAP      | -0.712846571 | 0.018364614 |
| ENSG00000177946 | CENPBD1   | 0.715300498  | 0.018394013 |
| ENSG00000088451 | TGDS      | 0.56890934   | 0.018416028 |
| ENSG00000259768 |           | -1.013017853 | 0.018425453 |
| ENSG00000178921 | PFAS      | -0.410135021 | 0.018441262 |
| ENSG00000222937 |           | -0.9341341   | 0.018462057 |
| ENSG00000169223 | LMAN2     | 0.384806715  | 0.0184917   |
| ENSG00000161714 | PLCD3     | -0.496516052 | 0.018512165 |
| ENSG00000158411 | MITD1     | 0.624908717  | 0.018539502 |
| ENSG00000236552 | RPL13AP5  | -0.34226092  | 0.018673763 |
| ENSG00000151729 | SLC25A4   | -1.866841968 | 0.018733117 |
| ENSG00000169641 | LUZP1     | -0.351038842 | 0.018739195 |
| ENSG00000165949 | IFI27     | 2.320325941  | 0.018773545 |
| ENSG00000205268 | PDE7A     | 0.425407236  | 0.018808594 |
| ENSG00000151623 | NR3C2     | -0.922658593 | 0.018830467 |
| ENSG00000254470 | AP5B1     | 0.474571829  | 0.018830467 |
| ENSG00000175582 | RAB6A     | 0.319108684  | 0.018830467 |
| ENSG00000101608 | MYL12A    | 0.347208281  | 0.018830467 |
| ENSG00000137331 | IER3      | -1.029027976 | 0.018846681 |
| ENSG00000165417 | GTF2A1    | 0.386868689  | 0.018900135 |
| ENSG00000171155 | C1GALT1C1 | 0.735623055  | 0.018934083 |
| ENSG00000171608 | PIK3CD    | 0.348353855  | 0.018941258 |
| ENSG00000123066 | MED13L    | -0.407014276 | 0.01895409  |
| ENSG00000139880 | CDH24     | -1.67539365  | 0.01895409  |
| ENSG00000151702 | FLI1      | 0.530637635  | 0.018983657 |
| ENSG00000187676 | B3GLCT    | -0.461585486 | 0.019029083 |
| ENSG00000108179 | PPIF      | -1.017125132 | 0.019053388 |
| ENSG00000166974 | MAPRE2    | -0.266570637 | 0.019053388 |
| ENSG00000248578 | NPM1P21   | -1.024446412 | 0.019115827 |
| ENSG00000168297 | PXK       | 0.33275745   | 0.019159152 |
| ENSG00000151117 | TMEM86A   | -0.621612366 | 0.019165043 |
| ENSG00000158270 | COLEC12   | -0.666440333 | 0.019165043 |
| ENSG00000188419 | CHM       | 0.356730362  | 0.019177252 |
| ENSG00000157184 | CPT2      | 0.570198494  | 0.019183087 |
| ENSG00000164168 | TMEM184C  | 0.359351343  | 0.019284442 |
| ENSG00000196205 | EEF1A1P5  | -0.399105169 | 0.019284442 |
| ENSG00000139180 | NDUFA9    | 0.298971052  | 0.019284442 |
| ENSG00000117697 | NSL1      | 0.517642071  | 0.019310721 |
| ENSG00000163312 | HELQ      | 0.373691113  | 0.019310721 |

|                 |            |              |             |
|-----------------|------------|--------------|-------------|
| ENSG00000161395 | PGAP3      | -0.315618328 | 0.019310721 |
| ENSG00000100997 | ABHD12     | -0.535997114 | 0.019310721 |
| ENSG00000198814 | GK         | 0.436026434  | 0.019401741 |
| ENSG00000122692 | SMU1       | 0.299079564  | 0.019420665 |
| ENSG00000103018 | CYB5B      | 0.484426125  | 0.019466041 |
| ENSG00000178175 | ZNF366     | 1.190809817  | 0.01947524  |
| ENSG00000186105 | LRRC70     | -1.100009569 | 0.019522782 |
| ENSG00000147471 | PROSC      | 0.515760823  | 0.019591339 |
| ENSG00000173230 | GOLGB1     | -0.321492999 | 0.019624597 |
| ENSG00000119661 | DNAL1      | -0.398996421 | 0.019665708 |
| ENSG00000157426 | AASDH      | 0.517129099  | 0.019675039 |
| ENSG00000247121 |            | 0.661638409  | 0.019684567 |
| ENSG00000177479 | ARIH2      | -0.186122565 | 0.01977908  |
| ENSG00000092096 | SLC22A17   | -2.60208744  | 0.01977908  |
| ENSG00000157379 | DHRS1      | 0.373563806  | 0.019797041 |
| ENSG00000173875 | ZNF791     | -0.39314879  | 0.019828106 |
| ENSG00000134369 | NAV1       | -0.683233996 | 0.019897792 |
| ENSG00000234284 | ZNF879     | 0.64586156   | 0.020069463 |
| ENSG00000107937 | GTPBP4     | -0.480423599 | 0.020069463 |
| ENSG00000170425 | ADORA2B    | -1.706511879 | 0.020069733 |
| ENSG00000157191 | NECAP2     | 0.386255306  | 0.020118242 |
| ENSG00000130363 | RSPH3      | 0.562413485  | 0.020126425 |
| ENSG00000116809 | ZBTB17     | -0.414597622 | 0.020153725 |
| ENSG00000186446 | ZNF501     | 0.965879132  | 0.020156299 |
| ENSG00000248275 | TRIM52-AS1 | -0.471480154 | 0.020156299 |
| ENSG00000180992 | MRPL14     | 0.41408436   | 0.020216891 |
| ENSG00000101558 | VAPA       | -0.380920413 | 0.02022725  |
| ENSG00000159596 | TMEM69     | 0.521688007  | 0.020233855 |
| ENSG00000187866 | FAM122A    | 0.472488007  | 0.020233855 |
| ENSG00000187624 | C17orf97   | 2.130628705  | 0.020233855 |
| ENSG00000114391 | RPL24      | -0.271198819 | 0.020269009 |
| ENSG00000182473 | EXOC7      | 0.249715879  | 0.020327167 |
| ENSG00000166170 | BAG5       | -0.317726586 | 0.020382778 |
| ENSG00000119321 | FKBP15     | 0.510974894  | 0.020384951 |
| ENSG00000138111 | MFSD13A    | 0.574886224  | 0.020429119 |
| ENSG00000088833 | NSFL1C     | 0.326316343  | 0.020429119 |
| ENSG00000213997 | PGAM1P7    | -2.21309187  | 0.020464326 |
| ENSG00000111605 | CPSF6      | -0.301334396 | 0.020464326 |
| ENSG00000206077 | ZDHHC11B   | -2.618992322 | 0.020482588 |
| ENSG00000142173 | COL6A2     | -1.79095673  | 0.020482588 |
| ENSG00000260774 |            | -1.069450473 | 0.020494511 |
| ENSG00000009413 | REV3L      | -0.333215416 | 0.020494511 |
| ENSG00000109917 | ZPR1       | -0.339361333 | 0.020494511 |
| ENSG00000136315 |            | 0.766664802  | 0.020494511 |
| ENSG00000113194 | FAF2       | -0.288549321 | 0.020503567 |
| ENSG00000156502 | SUPV3L1    | -0.564641129 | 0.020514345 |
| ENSG00000205423 | CNEP1R1    | -0.404255672 | 0.020514432 |
| ENSG00000170871 | KIAA0232   | -0.301810408 | 0.020601014 |

|                 |           |              |             |
|-----------------|-----------|--------------|-------------|
| ENSG00000170027 | YWHAG     | 0.573746765  | 0.020601014 |
| ENSG00000166233 | ARIH1     | -0.41217038  | 0.020691743 |
| ENSG00000067177 | PHKA1     | -1.229407724 | 0.020710192 |
| ENSG00000102805 | CLN5      | 0.525327911  | 0.020725826 |
| ENSG00000161513 | FDXR      | 0.679523345  | 0.020725826 |
| ENSG00000156256 | USP16     | -0.44131167  | 0.020725826 |
| ENSG00000143207 | RFWD2     | 0.234044751  | 0.020737935 |
| ENSG00000079332 | SAR1A     | -0.467551207 | 0.020737935 |
| ENSG00000196387 | ZNF140    | 0.411230208  | 0.020737935 |
| ENSG00000069345 | DNAJA2    | 0.275110674  | 0.020741048 |
| ENSG00000100883 | SRP54     | 0.406563763  | 0.020746166 |
| ENSG00000225855 | RUSC1-AS1 | 0.752496087  | 0.020760376 |
| ENSG00000143633 | C1orf131  | 0.409208278  | 0.020760376 |
| ENSG00000269929 |           | -0.834823707 | 0.020760376 |
| ENSG00000134453 | RBM17     | -0.243963419 | 0.020760376 |
| ENSG00000205659 | LIN52     | 0.453779367  | 0.020820274 |
| ENSG00000113360 | DROSHA    | 0.340658186  | 0.020836986 |
| ENSG00000069329 | VPS35     | 0.425849386  | 0.020857591 |
| ENSG00000186432 | KPNA4     | -0.288310839 | 0.020890966 |
| ENSG00000116514 | RNF19B    | 0.551486564  | 0.020905019 |
| ENSG00000254901 | BORCS8    | 0.440056124  | 0.020919707 |
| ENSG00000143183 | TMCO1     | 0.405759558  | 0.021009694 |
| ENSG00000112367 | FIG4      | 0.509480081  | 0.021009694 |
| ENSG00000224596 | ZMIZ1-AS1 | -1.497825871 | 0.021009694 |
| ENSG00000101337 | TM9SF4    | 0.276242925  | 0.021009694 |
| ENSG00000267796 | LIN37     | 0.495393277  | 0.021009694 |
| ENSG00000163872 | YEATS2    | 0.283766269  | 0.021084019 |
| ENSG00000132170 | PPARG     | -1.893252982 | 0.021101117 |
| ENSG00000132467 | UTP3      | 0.440011152  | 0.021101117 |
| ENSG00000198408 | MGEA5     | -0.248404764 | 0.021101117 |
| ENSG00000277589 |           | -0.955567191 | 0.021148408 |
| ENSG00000124356 | STAMPB    | 0.405090848  | 0.021175472 |
| ENSG00000112182 | BACH2     | -1.130464225 | 0.021180941 |
| ENSG00000135439 | AGAP2     | 0.504029867  | 0.021201289 |
| ENSG00000137818 | RPLP1     | -0.336800552 | 0.021201289 |
| ENSG00000130640 | TUBGCP2   | -0.24410695  | 0.021226663 |
| ENSG00000140598 | EFL1      | 0.37408397   | 0.021228401 |
| ENSG00000114062 | UBE3A     | -0.345604533 | 0.021242539 |
| ENSG00000127993 | RBM48     | -0.495433642 | 0.0212457   |
| ENSG00000130734 | ATG4D     | -0.403996989 | 0.0212457   |
| ENSG00000058056 | USP13     | -0.457445449 | 0.021248832 |
| ENSG00000118217 | ATF6      | 0.308472568  | 0.021256562 |
| ENSG00000155545 | MIER3     | -0.4490495   | 0.021265933 |
| ENSG00000163568 | AIM2      | 1.344082769  | 0.021292802 |
| ENSG00000164620 | RELL2     | 0.612961146  | 0.021302466 |
| ENSG00000071205 | ARHGAP10  | -0.722831525 | 0.021361324 |
| ENSG00000240230 | COX19     | -0.267039542 | 0.021361324 |
| ENSG00000230673 | PABPC1P3  | -1.002525544 | 0.021363196 |

|                 |           |              |             |
|-----------------|-----------|--------------|-------------|
| ENSG00000196664 | TLR7      | 1.101928589  | 0.021379262 |
| ENSG00000163599 | CTLA4     | -2.178263584 | 0.021385236 |
| ENSG00000172785 | CBWD1     | 0.394417969  | 0.021402331 |
| ENSG00000101654 | RNMT      | -0.546687576 | 0.021467019 |
| ENSG00000168894 | RNF181    | 0.401094468  | 0.021479942 |
| ENSG00000041802 | LSG1      | -0.4162874   | 0.021479942 |
| ENSG00000198888 | MT-ND1    | -0.398498691 | 0.021479942 |
| ENSG00000205213 | LGR4      | -0.774479102 | 0.021490578 |
| ENSG00000214389 | RPS3AP26  | -0.376833181 | 0.021493562 |
| ENSG00000142541 | RPL13A    | -0.28957975  | 0.021569963 |
| ENSG00000153130 | SCOC      | 0.550316826  | 0.02167541  |
| ENSG00000139675 | HNRNPA1L2 | -0.529448267 | 0.02167541  |
| ENSG00000184451 | CCR10     | -1.217533483 | 0.02167541  |
| ENSG00000196704 | AMZ2      | -0.347083637 | 0.02167541  |
| ENSG00000169385 | RNASE2    | 1.241545217  | 0.021682847 |
| ENSG00000119013 | NDUFB3    | 0.486258774  | 0.021705212 |
| ENSG00000164117 | FBXO8     | 0.48110913   | 0.021705212 |
| ENSG00000197170 | PSMD12    | -0.464694453 | 0.021766819 |
| ENSG00000187801 | ZFP69B    | 0.743902167  | 0.021785285 |
| ENSG00000105053 | VRK3      | 0.323867275  | 0.021787551 |
| ENSG00000013297 | CLDN11    | -0.669836342 | 0.021809272 |
| ENSG00000279738 |           | -0.516017051 | 0.021847684 |
| ENSG00000105851 | PIK3CG    | -0.421734063 | 0.021919486 |
| ENSG00000170632 | ARMC10    | 0.449098915  | 0.021984546 |
| ENSG00000169193 | CCDC126   | 0.649092566  | 0.02199144  |
| ENSG00000164144 | ARFIP1    | 0.567571865  | 0.02201764  |
| ENSG00000145632 | PLK2      | -1.241959776 | 0.02201764  |
| ENSG00000278869 |           | 0.919738243  | 0.02207143  |
| ENSG00000171453 | POLR1C    | -0.447139717 | 0.022094203 |
| ENSG00000180573 | HIST1H2AC | 0.788502375  | 0.022198293 |
| ENSG00000132773 | TOE1      | -0.525841403 | 0.022227068 |
| ENSG00000136541 | ERMN      | -1.102525456 | 0.022305211 |
| ENSG00000115520 | COQ10B    | -0.499709545 | 0.022312718 |
| ENSG00000185839 |           | 0.679622288  | 0.022327724 |
| ENSG00000140988 | RPS2      | -0.317461985 | 0.022327724 |
| ENSG00000101193 | GID8      | -0.225897044 | 0.022330218 |
| ENSG00000188305 | C19orf35  | 1.348891479  | 0.022335458 |
| ENSG00000167595 | PROSER3   | -0.3782278   | 0.022335458 |
| ENSG00000105464 | GRIN2D    | 0.514558638  | 0.022356099 |
| ENSG00000223725 |           | -0.812367236 | 0.022545798 |
| ENSG00000135315 | CEP162    | 0.519174322  | 0.022545798 |
| ENSG00000272391 | POM121C   | -0.265144567 | 0.022545798 |
| ENSG00000232187 | FTH1P7    | -0.672972284 | 0.022545798 |
| ENSG00000155959 | VBP1      | 0.3981992    | 0.022683588 |
| ENSG00000166839 | ANKDD1A   | -1.291713553 | 0.022683588 |
| ENSG00000146410 | MTRF2     | -1.0115123   | 0.022713833 |
| ENSG00000104626 | ERI1      | 0.448061077  | 0.022713833 |
| ENSG00000163932 | PRKCD     | 0.400200345  | 0.022714955 |



|                 |          |              |             |
|-----------------|----------|--------------|-------------|
| ENSG00000205726 | ITSN1    | 0.52336164   | 0.022714955 |
| ENSG00000188997 | KCTD21   | 0.765791477  | 0.022724652 |
| ENSG00000019995 | ZRANB1   | -0.366256244 | 0.022724652 |
| ENSG00000182774 | RPS17    | -0.295880729 | 0.022777165 |
| ENSG00000173221 | GLRX     | 0.63629033   | 0.02282667  |
| ENSG00000122557 | HERPUD2  | 0.253590503  | 0.022957692 |
| ENSG00000133874 | RNF122   | 0.479239266  | 0.022957692 |
| ENSG00000013364 | MVP      | 0.340141533  | 0.022970899 |
| ENSG00000176087 | SLC35A4  | 0.346051007  | 0.022985359 |
| ENSG00000117899 | MESDC2   | 0.393788444  | 0.023012047 |
| ENSG00000108239 | TBC1D12  | -0.661752119 | 0.023063219 |
| ENSG00000113273 | ARSB     | 0.354678537  | 0.023112697 |
| ENSG00000146676 | PURB     | -0.465334907 | 0.023112697 |
| ENSG00000120896 | SORBS3   | -0.52014262  | 0.023112697 |
| ENSG00000125971 | DYNLRB1  | 0.345618945  | 0.023112697 |
| ENSG00000130348 | QRSL1    | 0.506518894  | 0.023132118 |
| ENSG00000102738 | MRPS31   | 0.758228773  | 0.023174473 |
| ENSG00000132155 | RAF1     | -0.211023508 | 0.023222519 |
| ENSG00000123411 | IKZF4    | -0.467913854 | 0.023222519 |
| ENSG00000162735 | PEX19    | 0.277669731  | 0.023255297 |
| ENSG00000122547 | EEDP1    | -0.705965223 | 0.023255297 |
| ENSG00000118162 | KPTN     | 0.548741734  | 0.023297651 |
| ENSG00000255328 |          | 1.369051989  | 0.023329756 |
| ENSG00000175262 | C1orf127 | -0.706589533 | 0.023495234 |
| ENSG00000136842 | TMOD1    | 1.383668339  | 0.023495234 |
| ENSG00000140859 | KIFC3    | -1.26741219  | 0.023495234 |
| ENSG00000125629 | INSIG2   | 0.459492111  | 0.023542334 |
| ENSG00000146842 | TMEM209  | 0.423612446  | 0.023542334 |
| ENSG00000138835 | RGS3     | 0.855667684  | 0.023542334 |
| ENSG00000163946 | FAM208A  | 0.364706287  | 0.023550027 |
| ENSG00000183431 | SF3A3    | -0.320324731 | 0.02363545  |
| ENSG00000156860 | FBRS     | -0.362880135 | 0.023685765 |
| ENSG00000164916 | FOXK1    | -0.354941799 | 0.023705842 |
| ENSG00000160191 | PDE9A    | 1.120258958  | 0.023707822 |
| ENSG00000197696 | NMB      | -0.704113916 | 0.023718043 |
| ENSG00000179115 | FARSA    | 0.514515264  | 0.023718043 |
| ENSG00000198467 | TPM2     | -0.647104822 | 0.023739607 |
| ENSG00000177272 | KCNA3    | 0.618896655  | 0.023956789 |
| ENSG00000168214 | RBPJ     | -0.405724104 | 0.023986452 |
| ENSG00000162650 | ATXN7L2  | -0.408080182 | 0.024025353 |
| ENSG00000272636 | DOC2B    | -1.268083011 | 0.024075722 |
| ENSG00000102878 | HSF4     | -0.521359852 | 0.024094552 |
| ENSG00000275700 | AATF     | 0.2766232    | 0.024121993 |
| ENSG00000237296 | SMG1P1   | -0.550841726 | 0.024144141 |
| ENSG00000100889 | PCK2     | 0.55739065   | 0.024262385 |
| ENSG00000229119 |          | -0.701493551 | 0.024327632 |
| ENSG00000101082 | SLA2     | -1.009456552 | 0.024355116 |
| ENSG00000271976 |          | 0.673771471  | 0.024379757 |

|                 |          |              |             |
|-----------------|----------|--------------|-------------|
| ENSG00000163682 | RPL9     | -0.350746234 | 0.024384186 |
| ENSG00000009307 | CSDE1    | -0.256954189 | 0.024612346 |
| ENSG00000113441 | LNPEP    | 0.361939856  | 0.024612346 |
| ENSG00000148842 | CNNM2    | -0.459341286 | 0.024612346 |
| ENSG00000138660 | AP1AR    | 0.458831962  | 0.024641909 |
| ENSG00000230207 | RPL4P5   | -0.418145803 | 0.024641909 |
| ENSG00000181191 | PJA1     | 0.415429543  | 0.024653772 |
| ENSG00000165832 | TRUB1    | 0.479650463  | 0.024653772 |
| ENSG00000104177 | MYEF2    | -0.797859257 | 0.024653772 |
| ENSG00000278311 | GGNBP2   | -0.358103322 | 0.024722274 |
| ENSG00000213928 | IRF9     | 0.348157723  | 0.024759535 |
| ENSG00000153029 | MR1      | 0.310943142  | 0.024761525 |
| ENSG00000228903 | RASA4CP  | -0.514962978 | 0.024761525 |
| ENSG00000174125 | TLR1     | 0.559602298  | 0.024766902 |
| ENSG00000126062 | TMEM115  | 0.39084013   | 0.024822345 |
| ENSG00000123349 | PFDN5    | -0.271430006 | 0.02486348  |
| ENSG00000251417 |          | -0.621119789 | 0.02486348  |
| ENSG00000100823 | APEX1    | -0.294555944 | 0.02487951  |
| ENSG00000107863 | ARHGAP21 | -0.530504992 | 0.024944584 |
| ENSG00000274104 |          | -0.632243527 | 0.02498281  |
| ENSG00000196247 | ZNF107   | 0.504961762  | 0.02510789  |
| ENSG00000119397 | CNTRL    | 0.418885224  | 0.02510789  |
| ENSG00000113384 | GOLPH3   | 0.320425559  | 0.025140179 |
| ENSG00000160293 | VAV2     | -0.458190075 | 0.025140179 |
| ENSG00000175354 | PTPN2    | 0.229756156  | 0.025140179 |
| ENSG00000124422 | USP22    | -0.263524063 | 0.025229455 |
| ENSG00000164615 | CAMLG    | -0.272765501 | 0.025314596 |
| ENSG00000278535 | DHRS11   | -0.652487715 | 0.025314596 |
| ENSG00000196497 | IPO4     | -0.562927872 | 0.025349808 |
| ENSG00000094880 | CDC23    | 0.383285113  | 0.025536936 |
| ENSG00000123610 | TNFAIP6  | 1.424234372  | 0.025605474 |
| ENSG00000226314 | ZNF192P1 | 1.087709613  | 0.025636939 |
| ENSG00000108021 | FAM208B  | -0.344585059 | 0.025636939 |
| ENSG00000130005 | GAMT     | -0.938484288 | 0.025636939 |
| ENSG00000137168 | PPIL1    | 0.686970109  | 0.025661973 |
| ENSG00000164051 | CCDC51   | 0.566130309  | 0.025676093 |
| ENSG00000188389 | PDCD1    | -1.953211853 | 0.025689771 |
| ENSG00000148680 | HTR7     | -0.890837831 | 0.025689771 |
| ENSG00000107719 | PALD1    | -1.670577392 | 0.025764563 |
| ENSG00000122026 | RPL21    | -0.310778751 | 0.025794745 |
| ENSG00000185122 | HSF1     | -0.213300943 | 0.025801434 |
| ENSG00000176946 | THAP4    | -0.345401549 | 0.025839184 |
| ENSG00000108666 | C17orf75 | 0.362735547  | 0.025855212 |
| ENSG00000105321 | CCDC9    | -0.540761326 | 0.02588555  |
| ENSG00000064607 | SUGP2    | -0.26531027  | 0.025943907 |
| ENSG00000198315 | ZKSCAN8  | -0.438919762 | 0.025983877 |
| ENSG00000155265 | GOLGA7B  | -1.716421516 | 0.025987505 |
| ENSG00000269858 | EGLN2    | -0.314913981 | 0.025997166 |

|                 |           |              |             |
|-----------------|-----------|--------------|-------------|
| ENSG00000109381 | ELF2      | -0.317797947 | 0.026000377 |
| ENSG00000113448 | PDE4D     | -1.072962291 | 0.026005266 |
| ENSG00000266677 |           | -0.67371878  | 0.026005266 |
| ENSG00000163735 | CXCL5     | -2.600151247 | 0.026066841 |
| ENSG00000182307 | C8orf33   | -0.279259188 | 0.026066841 |
| ENSG00000141837 | CACNA1A   | 1.203234089  | 0.026066841 |
| ENSG00000257815 |           | -0.501876584 | 0.026077939 |
| ENSG00000143158 | MPC2      | -0.276519624 | 0.026088966 |
| ENSG00000013441 | CLK1      | -0.507476583 | 0.026088966 |
| ENSG00000113732 | ATP6V0E1  | 0.387757413  | 0.026088966 |
| ENSG00000111726 | CMAS      | 0.400901302  | 0.026122911 |
| ENSG00000204438 | GPANK1    | 0.425195795  | 0.026350651 |
| ENSG00000259834 |           | 0.485590811  | 0.026368849 |
| ENSG00000267896 | NA        | -0.414558615 | 0.026443441 |
| ENSG00000277916 |           | -0.897174086 | 0.026506114 |
| ENSG00000171863 | RPS7      | -0.249433943 | 0.026572158 |
| ENSG00000277687 |           | -0.591521533 | 0.026572158 |
| ENSG00000162543 | UBXN10    | -1.372160057 | 0.026626892 |
| ENSG00000171631 | P2RY6     | 1.054444279  | 0.026626892 |
| ENSG00000171456 | ASXL1     | -0.24031222  | 0.026626892 |
| ENSG00000124920 | MYRF      | -1.291243572 | 0.026640077 |
| ENSG00000096060 | FKBP5     | 0.761525972  | 0.026658305 |
| ENSG00000139112 | GABARAPL1 | -1.184924212 | 0.026665079 |
| ENSG00000163257 | DCAF16    | -0.380003496 | 0.026705042 |
| ENSG00000016864 | GLT8D1    | 0.550054565  | 0.026784655 |
| ENSG00000273272 |           | 0.974585173  | 0.026784655 |
| ENSG00000138669 | PRKG2     | -2.329019701 | 0.026870125 |
| ENSG00000261269 |           | 1.171418616  | 0.026870125 |
| ENSG00000065665 | SEC61A2   | -0.544848296 | 0.026889249 |
| ENSG00000167904 | TMEM68    | 0.486023683  | 0.026919308 |
| ENSG00000156886 | ITGAD     | -1.999947611 | 0.026950767 |
| ENSG00000186063 | AIDA      | 0.461306594  | 0.026964856 |
| ENSG00000186660 | ZFP91     | -0.310424503 | 0.027003573 |
| ENSG00000265100 |           | -0.886260984 | 0.027009618 |
| ENSG00000128654 | MTX2      | 0.365727671  | 0.027073782 |
| ENSG00000103194 | USP10     | 0.254588142  | 0.027073782 |
| ENSG00000169180 | XPO6      | 0.239426151  | 0.027107494 |
| ENSG00000130147 | SH3BP4    | -0.935306494 | 0.027118314 |
| ENSG00000146409 | SLC18B1   | 0.447270242  | 0.027179779 |
| ENSG00000198171 | DDRGK1    | 0.275723553  | 0.027206792 |
| ENSG00000058804 | NDC1      | -0.383462833 | 0.027260404 |
| ENSG00000214765 | SEPT7P2   | -0.373209107 | 0.027260404 |
| ENSG00000117569 | PTBP2     | -0.45304669  | 0.027388161 |
| ENSG00000167615 | LENG8     | -0.37100811  | 0.027439796 |
| ENSG00000181074 | OR52N4    | 1.625211081  | 0.027440053 |
| ENSG00000113070 | HBEGF     | -1.285977231 | 0.027622845 |
| ENSG00000148835 | TAF5      | 0.492318204  | 0.027707634 |
| ENSG00000255135 |           | -0.76442528  | 0.027749908 |

|                 |           |              |             |
|-----------------|-----------|--------------|-------------|
| ENSG00000214548 | MEG3      | -1.520985253 | 0.027749908 |
| ENSG00000198886 | MT-ND4    | -0.379259049 | 0.027771769 |
| ENSG00000130810 | PPAN      | -0.436886618 | 0.027786488 |
| ENSG00000151116 | UEVLD     | 0.453162667  | 0.027788711 |
| ENSG00000171067 | C11orf24  | 0.42830543   | 0.027788711 |
| ENSG00000123104 | ITPR2     | 0.358527349  | 0.027817322 |
| ENSG00000136867 | SLC31A2   | 0.634688867  | 0.027827955 |
| ENSG00000152990 | ADGRA3    | -1.063321341 | 0.027862907 |
| ENSG00000174945 | AMZ1      | -1.348541781 | 0.027862907 |
| ENSG00000062716 | VMP1      | 0.469120456  | 0.027862907 |
| ENSG00000184293 | CLECL1    | 1.133070863  | 0.027882627 |
| ENSG00000112167 | SAYSD1    | 0.357578897  | 0.0278962   |
| ENSG00000180509 | KCNE1     | 0.571797184  | 0.0278962   |
| ENSG00000224531 | SMIM13    | -0.352099272 | 0.027912282 |
| ENSG00000169313 | P2RY12    | 1.546173895  | 0.02793253  |
| ENSG00000169660 | HEXDC     | 0.606761164  | 0.027966911 |
| ENSG00000127526 | SLC35E1   | -0.322145481 | 0.027988018 |
| ENSG00000053501 | USE1      | -0.313111258 | 0.028000792 |
| ENSG00000157303 | SUSD3     | 0.579862795  | 0.028110889 |
| ENSG00000141699 | FAM134C   | 0.430435057  | 0.028193106 |
| ENSG00000163626 | COX18     | 0.405050345  | 0.028216019 |
| ENSG00000160446 | ZDHHC12   | 0.315742373  | 0.028228875 |
| ENSG00000196236 | XPNPEP3   | -0.371069213 | 0.028280139 |
| ENSG00000204852 | TCTN1     | -0.511456294 | 0.028366996 |
| ENSG00000198146 | ZNF770    | 0.427674987  | 0.028387673 |
| ENSG00000225978 | HAR1A     | -1.665351888 | 0.028387673 |
| ENSG00000014138 | POLA2     | 0.60777428   | 0.028406156 |
| ENSG00000092148 | HECTD1    | -0.245694951 | 0.028406156 |
| ENSG00000176049 | JAKMIP2   | -1.474742022 | 0.028409472 |
| ENSG00000131018 | SYNE1     | 0.454234127  | 0.028409472 |
| ENSG00000146700 | SSC4D     | 0.86910199   | 0.028409472 |
| ENSG00000198730 | CTR9      | 0.377058708  | 0.028409472 |
| ENSG00000104164 | BLOC1S6   | -0.305417901 | 0.02847244  |
| ENSG00000228956 | SATB1-AS1 | -1.028981217 | 0.028500066 |
| ENSG00000234742 |           | -0.784120689 | 0.028540322 |
| ENSG00000273253 |           | -0.649806281 | 0.028601951 |
| ENSG00000257122 | RRN3P3    | -0.318107289 | 0.028605169 |
| ENSG00000143554 | SLC27A3   | 0.539087206  | 0.028616749 |
| ENSG00000204272 | LINC01420 | -0.362599758 | 0.028616749 |
| ENSG00000126005 | MMP24-AS1 | -0.3926302   | 0.028619222 |
| ENSG00000189067 | LITAF     | -0.525767201 | 0.028670541 |
| ENSG00000255150 | EID3      | -0.621062512 | 0.028684785 |
| ENSG00000175283 | DOLK      | 0.516196795  | 0.028746308 |
| ENSG00000203879 | GDI1      | -0.250422903 | 0.02878944  |
| ENSG00000010539 | ZNF200    | 0.523783775  | 0.028795508 |
| ENSG00000226287 | TMEM191A  | -0.7146285   | 0.028795508 |
| ENSG00000183726 | TMEM50A   | 0.283975219  | 0.028803055 |
| ENSG00000112511 | PHF1      | -0.482948806 | 0.028828246 |

|                 |          |              |             |
|-----------------|----------|--------------|-------------|
| ENSG00000099365 | STX1B    | -0.871980215 | 0.028840055 |
| ENSG00000257335 | MGAM     | 1.073260963  | 0.028926551 |
| ENSG00000111012 | CYP27B1  | -1.305897315 | 0.028947675 |
| ENSG00000145979 | TBC1D7   | -0.604497722 | 0.028993276 |
| ENSG00000123595 | RAB9A    | 0.448067865  | 0.028993276 |
| ENSG00000140694 | PARN     | 0.254625456  | 0.028993276 |
| ENSG00000073331 | ALPK1    | 0.434869616  | 0.02903456  |
| ENSG00000124785 | NRN1     | 1.550322669  | 0.029077178 |
| ENSG00000107643 | MAPK8    | -0.405130527 | 0.029077178 |
| ENSG00000170191 | NANP     | -0.620072359 | 0.029077178 |
| ENSG00000176915 | ANKLE2   | -0.272000226 | 0.029197116 |
| ENSG00000110711 | AIP      | 0.299719925  | 0.029229464 |
| ENSG00000182149 | IST1     | -0.337666916 | 0.029296897 |
| ENSG00000000457 | SCYL3    | 0.577764804  | 0.029355785 |
| ENSG00000115904 | SOS1     | 0.536716466  | 0.029557764 |
| ENSG00000172985 | SH3RF3   | -1.336202585 | 0.029695977 |
| ENSG00000103196 | CRISPLD2 | 0.700349816  | 0.029695977 |
| ENSG00000187474 | FPR3     | 1.447497325  | 0.029695977 |
| ENSG00000101544 | ADNP2    | -0.749776404 | 0.029719861 |
| ENSG00000107175 | CREB3    | 0.396513403  | 0.029720362 |
| ENSG00000026508 | CD44     | -0.339167412 | 0.029752372 |
| ENSG00000237772 |          | -0.79425688  | 0.029805361 |
| ENSG00000128000 | ZNF780B  | 0.779555945  | 0.029819982 |
| ENSG00000109220 | CHIC2    | 0.300941188  | 0.029990526 |
| ENSG00000101811 | CSTF2    | 0.453972316  | 0.029990526 |
| ENSG00000198742 | SMURF1   | -0.61736846  | 0.030028506 |
| ENSG00000144659 | SLC25A38 | -0.334018759 | 0.030066473 |
| ENSG00000120705 | ETF1     | -0.688634342 | 0.030066473 |
| ENSG00000204390 | HSPA1L   | 0.748184995  | 0.030066473 |
| ENSG00000127418 | FGFRL1   | -0.624712415 | 0.030121367 |
| ENSG00000095574 | IKZF5    | -0.430843465 | 0.030121367 |
| ENSG00000133935 | C14orf1  | 0.445356615  | 0.030160124 |
| ENSG00000229692 | SOS1-IT1 | 1.074741804  | 0.030166    |
| ENSG00000082213 | C5orf22  | 0.485518004  | 0.030175761 |
| ENSG00000198786 | MT-ND5   | -0.446921678 | 0.030175761 |
| ENSG00000225830 | ERCC6    | -0.391245406 | 0.030201238 |
| ENSG00000159403 | C1R      | -0.678303518 | 0.030207922 |
| ENSG00000100490 | CDKL1    | 0.706669142  | 0.030239253 |
| ENSG00000198416 | ZNF658B  | 1.263909834  | 0.030278931 |
| ENSG00000119950 | MXI1     | -0.583828018 | 0.030302298 |
| ENSG00000278727 |          | 0.704429101  | 0.030470559 |
| ENSG00000102096 | PIM2     | -0.496537412 | 0.03051267  |
| ENSG00000164877 | MICALL2  | -0.693862265 | 0.030543444 |
| ENSG00000182979 | MTA1     | -0.221859244 | 0.030543444 |
| ENSG00000151690 | MFSD6    | -0.362764016 | 0.030646186 |
| ENSG00000135960 | EDAR     | -2.453701799 | 0.030682095 |
| ENSG00000152683 | SLC30A6  | 0.388203707  | 0.030711068 |
| ENSG00000091527 | CDV3     | -0.272773725 | 0.030743659 |

|                 |           |              |             |
|-----------------|-----------|--------------|-------------|
| ENSG0000096696  | DSP       | 3.034074689  | 0.030743659 |
| ENSG00000214063 | TSPAN4    | -0.516570707 | 0.030743659 |
| ENSG00000205937 | RNPS1     | -0.231990593 | 0.030743659 |
| ENSG00000280987 |           | -1.051249936 | 0.030864774 |
| ENSG00000120306 | CYSTM1    | 0.53322688   | 0.030864774 |
| ENSG00000152193 | RNF219    | 0.519221184  | 0.030894578 |
| ENSG00000115414 | FN1       | -2.834571821 | 0.030998612 |
| ENSG00000123243 | ITIH5     | -0.613063205 | 0.030998612 |
| ENSG00000125457 | MIF4GD    | 0.257533342  | 0.031009977 |
| ENSG00000128383 | APOBEC3A  | 1.35979118   | 0.031125722 |
| ENSG00000090447 | TFAP4     | -0.521785565 | 0.031224586 |
| ENSG00000136040 | PLXNC1    | 0.435314751  | 0.031228312 |
| ENSG00000124571 | XPO5      | 0.296271303  | 0.031244354 |
| ENSG00000105609 | LILRB5    | 0.527959495  | 0.031244354 |
| ENSG00000117298 | ECE1      | 0.336115966  | 0.031340187 |
| ENSG00000168795 | ZBTB5     | -0.551230062 | 0.031340187 |
| ENSG00000133704 | IPO8      | 0.359383704  | 0.031346058 |
| ENSG00000162736 | NCSTN     | 0.261857201  | 0.031378131 |
| ENSG00000145241 | CENPC     | -0.379886934 | 0.031433789 |
| ENSG00000260966 |           | -0.507962462 | 0.031457041 |
| ENSG00000169860 | P2RY1     | -0.889190916 | 0.03147335  |
| ENSG00000108788 | MLX       | 0.346100545  | 0.03149664  |
| ENSG00000101782 | RIOK3     | -0.355006561 | 0.031566207 |
| ENSG00000096746 | HNRNPH3   | -0.300106202 | 0.031580246 |
| ENSG00000264083 |           | -0.498308093 | 0.031580246 |
| ENSG00000249855 | EEF1A1P19 | -0.474554493 | 0.031599581 |
| ENSG00000014919 | COX15     | 0.536248365  | 0.031639168 |
| ENSG00000271857 |           | -1.644194035 | 0.031748889 |
| ENSG00000066697 | MSANTD3   | -0.595873076 | 0.031748889 |
| ENSG00000173349 | SFT2D3    | -0.410657097 | 0.03183109  |
| ENSG00000166902 | MRPL16    | 0.40260536   | 0.031855528 |
| ENSG00000163930 | BAP1      | -0.25849132  | 0.03194476  |
| ENSG00000272599 |           | -0.878486036 | 0.03194476  |
| ENSG00000266865 |           | -0.564245685 | 0.031986649 |
| ENSG00000180155 | LYNX1     | -0.825777428 | 0.032034376 |
| ENSG00000069431 | ABCC9     | -0.516577769 | 0.032034376 |
| ENSG00000066827 | ZFAT      | -1.406289372 | 0.032044384 |
| ENSG00000141446 | ESCO1     | -0.30876805  | 0.032044384 |
| ENSG00000198736 | MSRB1     | 0.634456685  | 0.032056777 |
| ENSG00000249915 | PDCD6     | 0.313889614  | 0.032064611 |
| ENSG00000124613 | ZNF391    | 1.230859204  | 0.032064611 |
| ENSG00000139178 | C1RL      | 0.468290567  | 0.032064611 |
| ENSG00000182324 | KCNJ14    | -0.830595214 | 0.032064611 |
| ENSG00000182885 | ADGRG3    | -2.408081847 | 0.032133978 |
| ENSG00000143190 | POU2F1    | -0.362145787 | 0.032135943 |
| ENSG00000108175 | ZMIZ1     | -0.602906192 | 0.032135943 |
| ENSG00000279430 |           | -0.719495296 | 0.032164286 |
| ENSG00000143702 | CEP170    | -0.351424507 | 0.032164286 |

|                 |          |              |             |
|-----------------|----------|--------------|-------------|
| ENSG00000225470 | JPX      | 0.392503264  | 0.032164286 |
| ENSG00000214517 | PPME1    | 0.275012301  | 0.032164286 |
| ENSG00000127311 | HELB     | 0.418284283  | 0.032164286 |
| ENSG00000261609 | GAN      | -0.333675452 | 0.032164286 |
| ENSG00000162747 | FCGR3B   | 1.316085001  | 0.032244992 |
| ENSG00000068745 | IP6K2    | -0.242133281 | 0.032381398 |
| ENSG00000182545 | RNASE10  | -0.879565137 | 0.032381398 |
| ENSG00000196131 | VN1R2    | -0.941433439 | 0.032408689 |
| ENSG00000163634 | THOC7    | 0.314951738  | 0.032419453 |
| ENSG00000163608 | NEPRO    | -0.275192484 | 0.032419453 |
| ENSG00000107929 | LARP4B   | 0.28600014   | 0.032419453 |
| ENSG00000123200 | ZC3H13   | 0.34482021   | 0.032419453 |
| ENSG00000131473 | ACLY     | 0.398885569  | 0.032444892 |
| ENSG00000084073 | ZMPSTE24 | 0.355223603  | 0.032485428 |
| ENSG00000275202 |          | -1.066937809 | 0.032529353 |
| ENSG00000126001 | CEP250   | 0.430556094  | 0.032698585 |
| ENSG00000213420 | GPC2     | -0.815422857 | 0.032746985 |
| ENSG00000092098 | RNF31    | 0.342545948  | 0.032746985 |
| ENSG00000103160 | HSDL1    | 0.2871398    | 0.032746985 |
| ENSG00000176783 | RUFY1    | 0.260402364  | 0.032763325 |
| ENSG00000180902 | D2HGDH   | -0.517436769 | 0.032777429 |
| ENSG00000173208 | ABCD2    | -2.048978396 | 0.032777922 |
| ENSG00000099250 | NRP1     | -0.943257226 | 0.032899142 |
| ENSG00000113522 | RAD50    | 0.399483748  | 0.03298804  |
| ENSG00000082898 | XPO1     | 0.326361107  | 0.033008491 |
| ENSG00000051009 | FAM160A2 | 0.357009297  | 0.033140632 |
| ENSG00000123545 | NDUFAF4  | 0.471512543  | 0.033188596 |
| ENSG00000205534 | SMG1P2   | -0.635590571 | 0.03321358  |
| ENSG00000163867 | ZMYM6    | -0.272634173 | 0.033381118 |
| ENSG00000154305 | MIA3     | 0.337401862  | 0.033381118 |
| ENSG00000163539 | CLASP2   | -0.292578538 | 0.033381118 |
| ENSG00000101844 | ATG4A    | 0.372912658  | 0.033381118 |
| ENSG00000267655 |          | -0.968572962 | 0.033381118 |
| ENSG00000151414 | NEK7     | 0.378588385  | 0.033389883 |
| ENSG00000103248 | MTHFSD   | 0.444377192  | 0.03339768  |
| ENSG00000243199 |          | -0.536425096 | 0.033481638 |
| ENSG00000180104 | EXOC3    | -0.234564915 | 0.03350296  |
| ENSG00000204370 | SDHD     | 0.381418429  | 0.03350296  |
| ENSG00000274712 |          | -0.53279755  | 0.03350296  |
| ENSG00000135776 | ABCB10   | 0.272773132  | 0.033522356 |
| ENSG00000197258 | EIF4BP6  | -0.528029314 | 0.033522356 |
| ENSG00000105856 | HBP1     | -0.490712686 | 0.033530528 |
| ENSG00000107816 | LZTS2    | -0.510887076 | 0.033530528 |
| ENSG00000198538 | ZNF28    | 0.6917002    | 0.033530528 |
| ENSG00000258727 |          | -0.385686767 | 0.033551592 |
| ENSG00000173846 | PLK3     | -0.725348799 | 0.033729844 |
| ENSG00000092964 | DPYSL2   | 0.734380955  | 0.03376967  |
| ENSG00000154277 | UCHL1    | -2.751269243 | 0.03380761  |

|                 |           |              |             |
|-----------------|-----------|--------------|-------------|
| ENSG00000173276 | ZBTB21    | -0.855492864 | 0.033811221 |
| ENSG00000237775 | DDR1-AS1  | -0.729743869 | 0.033849878 |
| ENSG00000137944 | KYAT3     | 0.295793013  | 0.033864072 |
| ENSG00000260060 |           | -0.84288095  | 0.033876747 |
| ENSG00000078618 | NRDC      | 0.326231169  | 0.033910719 |
| ENSG00000267281 |           | -0.532362826 | 0.033910719 |
| ENSG00000168477 | TNXB      | -0.81635374  | 0.033966612 |
| ENSG00000136436 | CALCOCO2  | 0.260044474  | 0.034006362 |
| ENSG00000124151 | NCOA3     | -0.281400933 | 0.034006362 |
| ENSG00000100221 | JOSD1     | -0.750025401 | 0.034046551 |
| ENSG00000143811 | PYCR2     | 0.441056012  | 0.034244687 |
| ENSG00000213949 | ITGA1     | 0.959570611  | 0.034261679 |
| ENSG00000162927 | PUS10     | 0.476444226  | 0.034276043 |
| ENSG00000079950 | STX7      | 0.526197441  | 0.034311451 |
| ENSG00000143797 | MBOAT2    | -0.584851923 | 0.034457498 |
| ENSG00000234506 | LINC01506 | 0.721442219  | 0.034457498 |
| ENSG00000170004 | CHD3      | -0.307720213 | 0.034457498 |
| ENSG00000114023 | FAM162A   | -0.379082121 | 0.034463698 |
| ENSG00000170485 | NPAS2     | -1.890029621 | 0.034483417 |
| ENSG00000174137 | FAM53A    | 0.77783232   | 0.034507504 |
| ENSG00000105676 | ARMC6     | 0.456727863  | 0.034514072 |
| ENSG00000233426 | EIF3FP3   | -0.563626121 | 0.03451472  |
| ENSG00000204444 | APOM      | -0.663761701 | 0.034547939 |
| ENSG00000223496 | EXOSC6    | -0.395383401 | 0.034585486 |
| ENSG00000141510 | TP53      | 0.438092183  | 0.034585486 |
| ENSG00000167862 | MRPL58    | 0.430181856  | 0.034634626 |
| ENSG00000113648 | H2AFY     | -0.26271846  | 0.034654127 |
| ENSG00000165650 | PDZD8     | -0.432950607 | 0.034667086 |
| ENSG00000080845 | DLGAP4    | 0.318070336  | 0.034667086 |
| ENSG00000131188 | PRR7      | -0.660548268 | 0.03471395  |
| ENSG00000132017 | DCAF15    | -0.23660626  | 0.03471395  |
| ENSG00000144029 | MRPS5     | 0.373180698  | 0.034770812 |
| ENSG00000010818 | HIVP2     | 0.422645257  | 0.034770812 |
| ENSG00000173480 | ZNF417    | -0.359425575 | 0.034770812 |
| ENSG00000273247 |           | 0.464835015  | 0.034793804 |
| ENSG00000232022 | FAAHP1    | -1.3560911   | 0.034796865 |
| ENSG00000180871 | CXCR2     | 0.991782402  | 0.034819374 |
| ENSG00000197620 | CXorf40A  | -0.635073339 | 0.034825891 |
| ENSG00000130939 | UBE4B     | -0.189201101 | 0.034841365 |
| ENSG00000106608 | URGCP     | -0.348512793 | 0.034930722 |
| ENSG00000028839 | TBPL1     | 0.297510227  | 0.035018789 |
| ENSG00000135953 | MFSD9     | 0.352192635  | 0.03502022  |
| ENSG00000198727 | MT-CYB    | -0.42811006  | 0.03502022  |
| ENSG00000091106 | NLRC4     | 1.224301418  | 0.035023656 |
| ENSG00000275400 |           | -0.553786121 | 0.035026948 |
| ENSG00000083457 | ITGAE     | -0.455838291 | 0.035026948 |
| ENSG00000105556 | MIER2     | -0.274903286 | 0.035026948 |
| ENSG00000259071 |           | 0.815400535  | 0.03505975  |



|                 |           |              |             |
|-----------------|-----------|--------------|-------------|
| ENSG00000206560 | ANKRD28   | -0.704533634 | 0.035088987 |
| ENSG00000153898 | MCOLN2    | 0.833384175  | 0.035093441 |
| ENSG00000196850 | PPTC7     | -0.275245906 | 0.035093441 |
| ENSG00000170310 | STX8      | 0.385711337  | 0.035103278 |
| ENSG00000156531 | PHF6      | 0.512954681  | 0.035200652 |
| ENSG00000182985 | CADM1     | -1.874173353 | 0.035217779 |
| ENSG00000109854 | HTATIP2   | 0.404781777  | 0.035266431 |
| ENSG00000247982 | LINC00926 | -0.805296695 | 0.035437367 |
| ENSG00000198064 | NPIP3     | -1.082238996 | 0.035443246 |
| ENSG00000119203 | CPSF3     | 0.365426479  | 0.035478434 |
| ENSG00000131016 | AKAP12    | -1.700567064 | 0.035480675 |
| ENSG00000260196 |           | -1.284752133 | 0.035530483 |
| ENSG00000148925 | BTBD10    | 0.34361637   | 0.035608937 |
| ENSG00000075568 | TMEM131   | 0.243709744  | 0.035658151 |
| ENSG00000146457 | WTAP      | -0.425833086 | 0.035658151 |
| ENSG00000254528 |           | 1.037673527  | 0.035675321 |
| ENSG00000148110 | MFSD14B   | 0.423307197  | 0.035861701 |
| ENSG00000170734 | POLH      | 0.691014048  | 0.035898215 |
| ENSG00000142544 | CTU1      | 0.803372039  | 0.035898215 |
| ENSG00000124486 | USP9X     | -0.340071551 | 0.035906046 |
| ENSG00000090097 | PCBP4     | -0.704864045 | 0.035993517 |
| ENSG00000152219 | ARL14EP   | 0.40207731   | 0.035993517 |
| ENSG00000162600 | OMA1      | 0.507531477  | 0.036009694 |
| ENSG00000231259 |           | -0.548259879 | 0.036009694 |
| ENSG00000186230 | ZNF749    | -0.711976209 | 0.036009694 |
| ENSG00000064102 | ASUN      | 0.393888645  | 0.036038849 |
| ENSG00000231312 |           | -0.664786088 | 0.03612226  |
| ENSG00000164039 | BDH2      | 0.510593212  | 0.03612226  |
| ENSG00000187837 | HIST1H1C  | 0.609776145  | 0.03612226  |
| ENSG00000152240 | HAUS1     | 0.461742977  | 0.03612226  |
| ENSG00000185989 | RASA3     | -0.321502352 | 0.03612692  |
| ENSG00000263266 | RPS7P1    | -0.346779398 | 0.03612692  |
| ENSG00000204524 | ZNF805    | -0.541040595 | 0.03612692  |
| ENSG00000147650 | LRP12     | -1.007822987 | 0.036132086 |
| ENSG00000178966 | RMI1      | 0.749174568  | 0.036132086 |
| ENSG00000122970 | IFT81     | -0.52266654  | 0.036140154 |
| ENSG00000255026 |           | -1.658459218 | 0.036210494 |
| ENSG00000148300 | REXO4     | 0.332655646  | 0.036266311 |
| ENSG00000163788 | SNRK      | -0.335001598 | 0.036278497 |
| ENSG00000132589 | FLOT2     | 0.415491164  | 0.036285974 |
| ENSG00000002919 | SNX11     | 0.470320926  | 0.036296613 |
| ENSG00000132613 | MTSS1L    | -0.810139966 | 0.036350904 |
| ENSG00000151576 | QTRT2     | -0.264858292 | 0.036403749 |
| ENSG00000118985 | ELL2      | -1.187754745 | 0.036445232 |
| ENSG00000163602 | RYBP      | -0.485028572 | 0.036525391 |
| ENSG00000013725 | CD6       | -1.121645157 | 0.036590092 |
| ENSG00000185650 | ZFP36L1   | -0.447460785 | 0.036590092 |
| ENSG00000169246 | NPIP3     | -0.521782738 | 0.036590092 |

|                 |           |              |             |
|-----------------|-----------|--------------|-------------|
| ENSG00000154370 | TRIM11    | -0.286416628 | 0.03662827  |
| ENSG00000183696 | UPP1      | -0.556061099 | 0.03662827  |
| ENSG00000198168 | SVIP      | -0.502546133 | 0.03662827  |
| ENSG00000168003 | SLC3A2    | -0.27871577  | 0.03662827  |
| ENSG00000257017 | HP        | 1.308981432  | 0.03662827  |
| ENSG00000274370 |           | -0.975292888 | 0.03662827  |
| ENSG00000134769 | DTNA      | -0.913840759 | 0.036714672 |
| ENSG00000135124 | P2RX4     | -0.509625459 | 0.036718554 |
| ENSG00000161970 | RPL26     | -0.289614205 | 0.036718554 |
| ENSG00000110063 | DCPS      | 0.58696357   | 0.036721391 |
| ENSG00000131732 | ZCCHC9    | 0.293512874  | 0.0367471   |
| ENSG00000173198 | CYSLTR1   | 0.662927335  | 0.036876696 |
| ENSG00000137269 | LRRC1     | 0.676033089  | 0.036886105 |
| ENSG00000115942 | ORC2      | 0.53291029   | 0.036889902 |
| ENSG00000115525 | ST3GAL5   | 0.389047629  | 0.036943369 |
| ENSG00000153250 | RBMS1     | 0.288370037  | 0.036943369 |
| ENSG00000226221 | RPL26P19  | -0.5273178   | 0.036943369 |
| ENSG00000268069 |           | -0.924631665 | 0.037012861 |
| ENSG00000060642 | PIGV      | 0.561898722  | 0.037079092 |
| ENSG00000197557 | TTC30A    | 0.711222383  | 0.037085677 |
| ENSG00000083896 | YTHDC1    | -0.411977645 | 0.037085677 |
| ENSG00000176248 | ANAPC2    | -0.277175863 | 0.037180211 |
| ENSG00000173085 | COQ2      | 0.391570205  | 0.037186513 |
| ENSG00000253958 | CLDN23    | 0.806079368  | 0.037186513 |
| ENSG00000171169 | NAIF1     | 0.363423337  | 0.037186513 |
| ENSG00000110700 | RPS13     | -0.264627202 | 0.037186513 |
| ENSG00000198879 | SFMBT2    | -0.589242124 | 0.037186513 |
| ENSG00000183889 |           | -1.069073754 | 0.037186513 |
| ENSG00000152104 | PTPN14    | -0.619498542 | 0.037219728 |
| ENSG00000272462 |           | -0.532388084 | 0.037223404 |
| ENSG00000138002 | IFT172    | -0.453193509 | 0.037275033 |
| ENSG00000027847 | B4GALT7   | -0.281002539 | 0.037275033 |
| ENSG00000149218 | ENDOD1    | 0.54207209   | 0.037275033 |
| ENSG00000126003 | PLAGL2    | 0.326944029  | 0.037281579 |
| ENSG00000216490 | IFI30     | -0.813367007 | 0.037284405 |
| ENSG00000196705 | ZNF431    | -0.328650873 | 0.037284405 |
| ENSG00000180370 | PAK2      | 0.230585814  | 0.03733814  |
| ENSG00000260257 |           | -0.469113636 | 0.03733814  |
| ENSG00000173762 | CD7       | -0.56245249  | 0.037553944 |
| ENSG00000198715 | GLMP      | 0.382378831  | 0.037575294 |
| ENSG00000131368 | MRPS25    | -0.336828733 | 0.037832636 |
| ENSG00000177383 | MAGEF1    | 0.706738085  | 0.037832636 |
| ENSG00000163947 | ARHGEF3   | 0.547514663  | 0.037863261 |
| ENSG00000080603 | SRCAP     | -0.398507369 | 0.037886148 |
| ENSG00000134086 | VHL       | -0.262732875 | 0.037905577 |
| ENSG00000170629 | DPY19L2P2 | -0.598018769 | 0.037905577 |
| ENSG00000108100 | CCNY      | -0.263992683 | 0.037909922 |
| ENSG00000227500 | SCAMP4    | -0.342359009 | 0.037923236 |

|                 |           |              |             |
|-----------------|-----------|--------------|-------------|
| ENSG00000183741 | CBX6      | -0.370634398 | 0.037923236 |
| ENSG00000153214 | TMEM87B   | 0.397705533  | 0.038008573 |
| ENSG00000156127 | BATF      | 0.654899607  | 0.038008573 |
| ENSG00000254911 | SCARNA9   | -0.592535024 | 0.038058197 |
| ENSG00000140299 | BNIP2     | -0.285808905 | 0.038058197 |
| ENSG00000130559 | CAMSAP1   | -0.305531077 | 0.038070276 |
| ENSG00000177683 | THAP5     | 0.420175908  | 0.038086572 |
| ENSG00000072121 | ZFYVE26   | 0.267627165  | 0.038192743 |
| ENSG00000146223 | RPL7L1    | 0.296922074  | 0.038226689 |
| ENSG00000104687 | GSR       | 0.377520887  | 0.03831234  |
| ENSG00000136280 | CCM2      | 0.395854229  | 0.038320988 |
| ENSG00000128891 | C15orf57  | 0.388431126  | 0.038320988 |
| ENSG00000134265 | NAPG      | -0.302704768 | 0.038320988 |
| ENSG00000277161 | PIGW      | -0.489908164 | 0.038496064 |
| ENSG00000158528 | PPP1R9A   | -2.268325607 | 0.038510195 |
| ENSG00000100629 | CEP128    | -0.774120272 | 0.038525345 |
| ENSG00000140905 | GCSH      | -0.879119692 | 0.038525345 |
| ENSG00000091640 | SPAG7     | -0.230907834 | 0.038549601 |
| ENSG00000173692 | PSMD1     | 0.374898571  | 0.038549777 |
| ENSG00000141480 | ARRB2     | -0.24534073  | 0.038581481 |
| ENSG00000157551 | KCNJ15    | 0.66988429   | 0.038646068 |
| ENSG00000177706 | FAM20C    | -1.202401645 | 0.038707361 |
| ENSG00000226396 |           | -0.655417463 | 0.03872307  |
| ENSG00000163219 | ARHGAP25  | 0.354671017  | 0.038768863 |
| ENSG00000121310 | ECHDC2    | 0.583513361  | 0.038824436 |
| ENSG00000138286 | FAM149B1  | 0.316611707  | 0.038824436 |
| ENSG00000224614 | TNK2-AS1  | 0.73618491   | 0.03904766  |
| ENSG00000129219 | PLD2      | -0.370666711 | 0.03904766  |
| ENSG00000108963 | DPH1      | -0.316337831 | 0.039087445 |
| ENSG00000068120 | COASY     | 0.322307976  | 0.039087445 |
| ENSG00000187210 | GCNT1     | 0.960829139  | 0.039130579 |
| ENSG00000256262 | USP30-AS1 | 0.64364203   | 0.039130579 |
| ENSG00000162972 | MAIP1     | 0.424773266  | 0.039155126 |
| ENSG00000101310 | SEC23B    | 0.359781143  | 0.039220051 |
| ENSG00000069712 | KIAA1107  | 0.586408918  | 0.03927648  |
| ENSG00000198435 | NRARP     | -1.654212686 | 0.039316824 |
| ENSG00000085788 | DDHD2     | -0.281584402 | 0.039357484 |
| ENSG00000133895 | MEN1      | 0.338780617  | 0.039440914 |
| ENSG00000196588 | MKL1      | 0.306818654  | 0.039510589 |
| ENSG00000142686 | C1orf216  | 0.721074747  | 0.039533234 |
| ENSG00000155561 | NUP205    | 0.252771452  | 0.039596997 |
| ENSG00000278158 |           | -1.853594391 | 0.039660029 |
| ENSG00000102309 | PIN4      | 0.437210493  | 0.039661773 |
| ENSG00000211454 | AKR7L     | -0.95172348  | 0.039840362 |
| ENSG00000160867 | FGFR4     | -1.141097483 | 0.039888239 |
| ENSG00000114796 | KLHL24    | -0.416266687 | 0.039896402 |
| ENSG00000068976 | PYGM      | -0.641340758 | 0.039924452 |
| ENSG00000174718 | KIAA1551  | 0.44710491   | 0.039924452 |

|                 |           |              |             |
|-----------------|-----------|--------------|-------------|
| ENSG00000167258 | CDK12     | -0.236408477 | 0.039929247 |
| ENSG00000227939 | RPL3P2    | -0.773690725 | 0.039932807 |
| ENSG00000154429 | CCSAP     | -0.455182531 | 0.039947253 |
| ENSG00000157837 | SPPL3     | -0.263162521 | 0.039947253 |
| ENSG00000136463 | TACO1     | 0.387622596  | 0.039979135 |
| ENSG00000117305 | HMGCL     | 0.470802752  | 0.040011381 |
| ENSG00000104325 | DECR1     | 0.333155619  | 0.040011381 |
| ENSG00000225331 |           | -0.762466392 | 0.040011381 |
| ENSG00000172005 | MAL       | -1.971333026 | 0.040022908 |
| ENSG00000164253 | WDR41     | 0.388880869  | 0.040137917 |
| ENSG00000135441 | BLOC1S1   | 0.363617854  | 0.0401607   |
| ENSG00000153790 | C7orf31   | 0.36227258   | 0.04023191  |
| ENSG00000185608 | MRPL40    | 0.354022916  | 0.04023191  |
| ENSG00000196912 | ANKRD36B  | -0.565924907 | 0.0403698   |
| ENSG00000112053 | SLC26A8   | 0.654299926  | 0.040380201 |
| ENSG00000198205 | ZXDA      | -0.582631378 | 0.040386377 |
| ENSG00000144120 | TMEM177   | 0.981317947  | 0.040391303 |
| ENSG00000161921 | CXCL16    | -1.165787698 | 0.040413343 |
| ENSG00000227543 | SPAG5-AS1 | -0.853084203 | 0.040461498 |
| ENSG00000002016 | RAD52     | 0.56627894   | 0.040492207 |
| ENSG00000230373 | GOLGA6L5P | -1.271894843 | 0.040547271 |
| ENSG00000235954 | TTC28-AS1 | -0.378263679 | 0.040568952 |
| ENSG00000204954 | C12orf73  | 0.596008074  | 0.040699447 |
| ENSG00000108559 | NUP88     | 0.268242492  | 0.040762732 |
| ENSG00000176014 | TUBB6     | -1.307920894 | 0.040856661 |
| ENSG00000132394 | EEFSEC    | 0.342262871  | 0.040953629 |
| ENSG00000120509 | PDZD11    | 0.497368452  | 0.040953629 |
| ENSG00000028528 | SNX1      | 0.447987947  | 0.040953629 |
| ENSG00000125319 | C17orf53  | -1.428027682 | 0.040953629 |
| ENSG00000177369 |           | -0.704985136 | 0.040953629 |
| ENSG00000175221 | MED16     | 0.44462848   | 0.040953629 |
| ENSG00000227199 | ST7-AS1   | -0.841681688 | 0.040960335 |
| ENSG00000105656 | ELL       | -0.326904548 | 0.0410085   |
| ENSG00000178226 | PRSS36    | -0.531042414 | 0.041064117 |
| ENSG00000168685 | IL7R      | -1.242043094 | 0.041087773 |
| ENSG00000250771 |           | 0.775421951  | 0.041262274 |
| ENSG00000166446 | CDYL2     | -0.582170322 | 0.041318856 |
| ENSG00000162585 | FAAP20    | -0.280942397 | 0.041384979 |
| ENSG00000145103 | ILDR1     | -1.098861341 | 0.041432673 |
| ENSG00000234009 | RPL5P34   | -0.438800084 | 0.041509774 |
| ENSG00000233476 | EEF1A1P6  | -0.3897842   | 0.041553561 |
| ENSG00000125977 | EIF2S2    | 0.387969379  | 0.041561104 |
| ENSG00000099284 | H2AFY2    | 0.545455547  | 0.041575839 |
| ENSG00000106591 | MRPL32    | 0.346527499  | 0.041611098 |
| ENSG00000145817 | YIPF5     | 0.33578122   | 0.041673088 |
| ENSG00000172172 | MRPL13    | 0.441746224  | 0.041674832 |
| ENSG00000197324 | LRP10     | 0.304316904  | 0.041674832 |
| ENSG00000174446 | SNAPC5    | 0.363669584  | 0.04169002  |

|                 |          |              |             |
|-----------------|----------|--------------|-------------|
| ENSG00000223865 | HLA-DPB1 | -0.688057405 | 0.041841627 |
| ENSG00000116406 | EDEM3    | 0.460639006  | 0.041847037 |
| ENSG00000273356 |          | -0.481645855 | 0.041847037 |
| ENSG00000154099 | DNAAF1   | 1.250435172  | 0.041847037 |
| ENSG00000133193 | FAM104A  | 0.317135673  | 0.041847037 |
| ENSG00000108669 | CYTH1    | -0.198919909 | 0.041972874 |
| ENSG00000280407 |          | -1.033229289 | 0.042020308 |
| ENSG00000101452 | DHX35    | -0.214841508 | 0.042276354 |
| ENSG00000087299 | L2HGDH   | -0.367299609 | 0.042340539 |
| ENSG00000111237 | VPS29    | 0.283397043  | 0.042580232 |
| ENSG00000032389 | TSSC1    | 0.310229671  | 0.042693848 |
| ENSG00000113013 | HSPA9    | -0.368502899 | 0.042693848 |
| ENSG00000235863 | B3GALT4  | 0.477679624  | 0.042693848 |
| ENSG00000227741 |          | -0.930529938 | 0.042696792 |
| ENSG00000115145 | STAM2    | 0.382387839  | 0.042774762 |
| ENSG00000189007 | ADAT2    | -0.356462794 | 0.042774762 |
| ENSG00000225541 |          | 2.249359447  | 0.042774762 |
| ENSG00000175556 | LONRF3   | -0.918903565 | 0.042774762 |
| ENSG00000275832 | ARHGAP23 | 0.717112713  | 0.04279235  |
| ENSG00000133639 | BTG1     | -0.460511089 | 0.042827912 |
| ENSG00000198723 | C19orf45 | -1.567148549 | 0.042830057 |
| ENSG00000105926 | MPP6     | -0.84294628  | 0.042862648 |
| ENSG00000063177 | RPL18    | -0.277348455 | 0.042862648 |
| ENSG00000088986 | DYNLL1   | 0.525379326  | 0.042879728 |
| ENSG00000198900 | TOP1     | -0.403948978 | 0.042889834 |
| ENSG00000147533 | GOLGA7   | 0.25392236   | 0.042949017 |
| ENSG00000084463 | WBP11    | -0.380455483 | 0.042949017 |
| ENSG00000196839 | ADA      | -0.824826609 | 0.04297269  |
| ENSG00000181418 | DDN      | -1.099892677 | 0.043274246 |
| ENSG00000143106 | PSMA5    | 0.400959094  | 0.04336335  |
| ENSG00000166503 |          | -0.867732991 | 0.043396802 |
| ENSG00000165929 | TC2N     | -1.428411299 | 0.043411892 |
| ENSG00000226824 |          | -0.823860615 | 0.043450248 |
| ENSG00000108651 | UTP6     | 0.34033531   | 0.0435784   |
| ENSG00000196975 | ANXA4    | 0.638797679  | 0.043673562 |
| ENSG00000205560 | CPT1B    | 0.623633115  | 0.043683729 |
| ENSG00000188177 | ZC3H6    | 0.449787696  | 0.043878307 |
| ENSG00000185304 | RGPD2    | -1.768965475 | 0.043905488 |
| ENSG00000124201 | ZNFX1    | 0.375159117  | 0.04403241  |
| ENSG00000163798 | SLC4A1AP | 0.301696422  | 0.044073242 |
| ENSG00000278022 |          | -0.980288454 | 0.044199742 |
| ENSG00000118242 | MREG     | -0.617635401 | 0.044200879 |
| ENSG00000279821 |          | -1.008505044 | 0.044260872 |
| ENSG00000187808 | SOWAHD   | 1.218738067  | 0.044260872 |
| ENSG00000259924 |          | 0.649498847  | 0.044260872 |
| ENSG00000265681 | RPL17    | -0.322254002 | 0.044463052 |
| ENSG00000182749 | PAQR7    | -0.528763541 | 0.044516311 |
| ENSG00000160654 | CD3G     | -0.780630159 | 0.044516311 |

|                 |           |              |             |
|-----------------|-----------|--------------|-------------|
| ENSG00000263990 |           | -0.594817431 | 0.044516311 |
| ENSG00000173114 | LRRN3     | -1.699094283 | 0.044539379 |
| ENSG00000100095 | SEZ6L     | -0.938291307 | 0.044577054 |
| ENSG00000139620 | KANSL2    | -0.462329484 | 0.044722008 |
| ENSG00000100528 | CNIH1     | -0.248019123 | 0.044797941 |
| ENSG00000156299 | TIAM1     | -0.509851187 | 0.04482844  |
| ENSG00000012211 | PRICKLE3  | 0.530638254  | 0.044855243 |
| ENSG00000145901 | TNIP1     | 0.301651002  | 0.044857373 |
| ENSG00000160991 | ORAI2     | -0.3372836   | 0.044858279 |
| ENSG00000114315 | HES1      | -1.512167804 | 0.044865232 |
| ENSG00000274561 |           | -0.587398073 | 0.044865232 |
| ENSG00000121742 | GJB6      | -2.374130992 | 0.044871971 |
| ENSG00000256039 |           | -1.667006254 | 0.044874164 |
| ENSG00000115685 | PPP1R7    | 0.264195526  | 0.044926578 |
| ENSG00000106330 | MOSPD3    | 0.376196546  | 0.044933582 |
| ENSG00000180198 | RCC1      | -0.472205636 | 0.044970514 |
| ENSG00000174928 | C3orf33   | -0.682857018 | 0.044970514 |
| ENSG00000134627 | PIWIL4    | 0.444831463  | 0.044989199 |
| ENSG00000139719 | VPS33A    | 0.37666336   | 0.044989199 |
| ENSG00000213213 | CCDC183   | -0.792931235 | 0.045171397 |
| ENSG00000003402 | CFLAR     | 0.293497243  | 0.045189933 |
| ENSG00000166189 | HPS6      | 0.708055471  | 0.045234117 |
| ENSG00000162458 | FBLIM1    | -0.822791418 | 0.045286099 |
| ENSG00000143742 | SRP9      | 0.311417364  | 0.045306519 |
| ENSG00000113649 | TCERG1    | -0.238592072 | 0.045376255 |
| ENSG00000213714 | FAM209B   | -0.726170325 | 0.045396255 |
| ENSG00000085832 | EPS15     | 0.31207967   | 0.045516747 |
| ENSG00000268001 | CARD8-AS1 | 0.709165379  | 0.045516747 |
| ENSG00000059588 | TARBP1    | -0.313006246 | 0.045585754 |
| ENSG00000172878 | METAP1D   | -0.642964167 | 0.045585754 |
| ENSG00000020129 | NCDN      | 0.549441244  | 0.045627992 |
| ENSG00000123933 | MXD4      | -0.356007475 | 0.045627992 |
| ENSG00000168282 | MGAT2     | 0.388705667  | 0.045731508 |
| ENSG00000171806 | METTL18   | 0.588245147  | 0.045745433 |
| ENSG00000170915 | PAQR8     | 0.932034789  | 0.045745433 |
| ENSG00000086062 | B4GALT1   | -0.456301025 | 0.045745433 |
| ENSG00000138615 | CILP      | -1.31464858  | 0.045745433 |
| ENSG00000103528 | SYT17     | -0.898680906 | 0.045842189 |
| ENSG00000280279 |           | -0.505064265 | 0.045842189 |
| ENSG00000273271 |           | -0.526163077 | 0.045913818 |
| ENSG00000259939 |           | -0.92813522  | 0.046173337 |
| ENSG00000176531 | PHLDB3    | -0.574883081 | 0.04619206  |
| ENSG00000211459 | MT-RNR1   | -0.460542974 | 0.046385506 |
| ENSG00000116106 | EPHA4     | -2.254713371 | 0.046492435 |
| ENSG00000165775 | FUNDC2    | -0.236742852 | 0.046561541 |
| ENSG00000150768 | DLAT      | 0.464735805  | 0.046608097 |
| ENSG00000180316 | PNPLA1    | 0.838732404  | 0.046660785 |
| ENSG00000130803 | ZNF317    | -0.321704863 | 0.046660785 |

|                 |          |              |             |
|-----------------|----------|--------------|-------------|
| ENSG00000197857 | ZNF44    | -0.375613915 | 0.046708887 |
| ENSG00000112234 | FBXL4    | 0.36697866   | 0.046778011 |
| ENSG00000067221 | STOML1   | 0.421421147  | 0.046778011 |
| ENSG00000133134 | BEX2     | -1.149672845 | 0.046794426 |
| ENSG00000136854 | STXBP1   | -1.050364583 | 0.046867269 |
| ENSG00000179331 | RAB39A   | 0.66645974   | 0.046867269 |
| ENSG00000182899 | RPL35A   | -0.272608879 | 0.04690721  |
| ENSG00000070770 | CSNK2A2  | -0.21445563  | 0.047047533 |
| ENSG00000155329 | ZCCHC10  | 0.303668517  | 0.047095574 |
| ENSG00000279908 |          | -0.943357879 | 0.047109696 |
| ENSG00000247679 |          | -0.506079651 | 0.047109696 |
| ENSG00000146904 | EPHA1    | 0.838391387  | 0.047109696 |
| ENSG00000140525 | FANCI    | -0.777778724 | 0.047109696 |
| ENSG00000152795 | HNRNPDL  | -0.203319536 | 0.047181915 |
| ENSG00000145050 | MANF     | 0.546621078  | 0.047198457 |
| ENSG00000057019 | DCBLD2   | -0.772443534 | 0.047204011 |
| ENSG00000170017 | ALCAM    | -0.588982674 | 0.047204011 |
| ENSG00000130985 | UBA1     | 0.245383755  | 0.047204011 |
| ENSG00000172732 | MUS81    | 0.357585623  | 0.047219096 |
| ENSG00000165424 | ZCCHC24  | -0.467881975 | 0.047235937 |
| ENSG00000119537 | KDSR     | -0.364971925 | 0.0472644   |
| ENSG00000102879 | CORO1A   | 0.316893985  | 0.047275306 |
| ENSG00000066294 | CD84     | -0.603034975 | 0.047291975 |
| ENSG00000177917 | ARL6IP6  | 0.371794566  | 0.047334376 |
| ENSG00000079459 | FDFT1    | 0.397234506  | 0.047334376 |
| ENSG00000251682 |          | -0.736975765 | 0.047349932 |
| ENSG00000117280 | RAB29    | 0.405213701  | 0.047360416 |
| ENSG00000104973 | MED25    | 0.309300426  | 0.047375201 |
| ENSG00000143774 | GUK1     | -0.28575131  | 0.047378261 |
| ENSG00000132792 | CTNBL1   | 0.222409877  | 0.047412235 |
| ENSG00000064490 | RFXANK   | 0.255588988  | 0.047412235 |
| ENSG00000100591 | AHSA1    | 0.475421296  | 0.047453672 |
| ENSG00000152767 | FARP1    | -0.543825983 | 0.047576994 |
| ENSG00000276107 |          | -1.900576921 | 0.047614533 |
| ENSG00000107263 | RAPGEF1  | -0.433751587 | 0.047666734 |
| ENSG00000120915 | EPHX2    | -1.489241779 | 0.047757715 |
| ENSG00000163519 | TRAT1    | -1.497079091 | 0.047814511 |
| ENSG00000185621 | LMLN     | -0.497515298 | 0.047823476 |
| ENSG00000157764 | BRAF     | -0.368742043 | 0.047831449 |
| ENSG00000204267 | TAP2     | 0.419002327  | 0.047834583 |
| ENSG00000005889 | ZFX      | -0.254474425 | 0.047835616 |
| ENSG00000161021 | MAML1    | 0.256537412  | 0.047835798 |
| ENSG00000126266 | FFAR1    | -1.47947673  | 0.047922337 |
| ENSG00000177663 | IL17RA   | 0.371892279  | 0.048013504 |
| ENSG00000101843 | PSMD10   | 0.335532476  | 0.048090088 |
| ENSG00000251143 |          | -0.482046572 | 0.048097795 |
| ENSG00000198700 | IPO9     | -0.210696739 | 0.048327272 |
| ENSG00000103544 | C16orf62 | 0.282296215  | 0.048350537 |

|                 |         |              |             |
|-----------------|---------|--------------|-------------|
| ENSG00000224546 | EIF4BP3 | -0.86005885  | 0.048355103 |
| ENSG00000263823 |         | -0.711279753 | 0.04835595  |
| ENSG00000091622 | PITPNM3 | -0.9075971   | 0.048766873 |
| ENSG00000169188 | APEX2   | 0.367235417  | 0.048850196 |
| ENSG00000076650 | GPATCH1 | 0.445153009  | 0.048850196 |
| ENSG00000234719 | NPIP2   | -0.56032154  | 0.048944245 |
| ENSG00000164077 | MON1A   | 0.673529645  | 0.048984921 |
| ENSG00000118507 | AKAP7   | 0.454734326  | 0.048984921 |
| ENSG00000188021 | UBQLN2  | 0.299783638  | 0.048984921 |
| ENSG00000183628 | DGCR6   | -0.533488766 | 0.048984921 |
| ENSG00000102786 | INTS6   | 0.289793148  | 0.048987491 |
| ENSG00000181638 | ZFP41   | 0.585588698  | 0.048994559 |
| ENSG00000171311 | EXOSC1  | 0.338695053  | 0.048994559 |
| ENSG00000264112 |         | -0.530351163 | 0.049155104 |
| ENSG00000166068 | SPRED1  | -0.756548733 | 0.049207196 |
| ENSG00000142208 | AKT1    | -0.197456006 | 0.049330083 |
| ENSG00000167863 | ATP5H   | 0.265483745  | 0.049392328 |
| ENSG00000271122 |         | 0.549068993  | 0.049420702 |
| ENSG00000274349 | ZNF658  | 0.877733289  | 0.049443985 |
| ENSG00000040531 | CTNS    | 0.315283048  | 0.049443985 |
| ENSG00000137054 | POLR1E  | -0.355078721 | 0.049445463 |
| ENSG00000040608 | RTN4R   | -2.251146231 | 0.049445463 |
| ENSG00000112304 | ACOT13  | 0.540197293  | 0.049568218 |
| ENSG00000120526 | NUDCD1  | 0.527432194  | 0.049585109 |
| ENSG00000157353 | FUK     | 0.264948418  | 0.049662752 |
| ENSG00000114316 | USP4    | -0.186229097 | 0.049723752 |
| ENSG00000137824 | RMDN3   | -0.230261014 | 0.04972421  |
| ENSG00000165512 | ZNF22   | 0.380158705  | 0.049731719 |
| ENSG00000087087 | SRRT    | -0.245257146 | 0.049888954 |
| ENSG00000117153 | KLHL12  | 0.255408858  | 0.049966643 |
