# Supplementary material for: Role of CD14+ monocyte-derived oxidised mitochondrial DNA in the inflammatory interferon type 1 signature in juvenile dermatomyositis
Source: PubMed Central journal article supplement (PMC10176342; doi:10.1136/ard-2022-223469), 2022-12-23
Supplement: ard-2022-223469supp005.pdf [file ard-2022-223469supp005.pdf]

Table 1 - Patient and control demographics and clinical characteristics

| Patient characteristics                                        | RNA-seq #         |                   |                   | Functional experiments        |                    |
|----------------------------------------------------------------|-------------------|-------------------|-------------------|-------------------------------|--------------------|
|                                                                | JDM pre-treatment | JDM on-treatment  | Controls          | JDM                           | Controls           |
| <b>Number of participants</b>                                  | <b>10</b>         | <b>11</b>         | <b>4</b>          | <b>82</b>                     | <b>35</b>          |
| Age at onset (years), median [range]                           | 9.14 [3.71-15.19] | 8.03 [2.56-15.19] | N/A               | 5.81 [0.79-15.37]             | N/A                |
| Age at diagnosis (years), median [range]                       | 9.35 [3.96-15.36] | 8.45 [2.73-15.36] | N/A               | 6.11 [1.28-16.20]             | N/A                |
| Age at sample (years), median [range]                          | 9.78 [4.00-15.39] | 9.56 [3.79-16.13] | 9.34 [7.15-11.12] | 7.50 [1.28-25.74]             | 11.45 [6.33-17.98] |
| Time since diagnosis (years), median [range]                   | 0.12 [0.00-0.82]  | 0.97 [0.77-1.12]  | N/A               | 0.07 [0.00-14.69]             | N/A                |
| Sex Female/Male (%F)                                           | 8/2 [80.00]       | 7/4 [63.64]       | 2/2               | 56/26 [68.29]                 | 23/12 [65.71]      |
| <b>Clinical information at time of sample:</b>                 |                   |                   |                   |                               |                    |
| PGA*(median [range])                                           | 7.1 [3.0-9.6]     | 1.5 [0.0-6.7]     | N/A               | 3.5 [0.0-9.0]                 | N/A                |
| CMAS* (median [range])                                         | 16 [0-31]         | 46 [23-53]        | N/A               | 41 [0-53]                     | N/A                |
| CK* value (median [range])                                     | 7282 [68-25937]   | 1355 [66-12689]   | N/A               | 118 [17-25937]                | N/A                |
| <b>Medication at time of sample [n=yes(%)]:</b>                |                   |                   |                   |                               |                    |
| Oral steroids                                                  | 1 (10.00)         | 9 (81.82)         | N/A               | 36 (34.28)                    | N/A                |
| Methotrexate                                                   | 0 (0.00)          | 11 (100.0)        | N/A               | 40 (38.09)                    | N/A                |
| Ciclosporin                                                    | 0 (0.00)          | 0 (0.00)          | N/A               | 1 (0.95)                      | N/A                |
| Azathioprine                                                   | 0 (0.00)          | 1 (9.09)          | N/A               | 3 (2.86)                      | N/A                |
| Cyclophosphamide                                               | 0 (0.00)          | 0 (0.00)          | N/A               | 4 (3.81)                      | N/A                |
| Hydroxychloroquine                                             | 0 (0.00)          | 1 (9.09)          | N/A               | 9 (8.57)                      | N/A                |
| <b>Myositis Specific Autoantibody (MSA)~ [n=positive(%)]:</b>  |                   |                   |                   |                               |                    |
| anti-Mi2                                                       | 2 (20.00)         | 3 (27.27)         | N/A               | 5 (5.75)                      | N/A                |
| anti-TIF1g                                                     | 1 (10.00)         | 2 (18.18)         | N/A               | 11 (12.64)                    | N/A                |
| anti-NXP2                                                      | 3 (30.00)         | 1 (9.09)          | N/A               | 15 (17.24)                    | N/A                |
| anti-MDA5 <sup>^</sup>                                         | 0 (0.00)          | 0 (0.00)          | N/A               | 9 (10.34)                     | N/A                |
| anti-SRP                                                       | 1 (10.00)         | 1 (9.09)          | N/A               | 4 (4.60)                      | N/A                |
| anti-OJ                                                        | 0 (0.00)          | 0 (0.00)          | N/A               | 1 (1.15)                      | N/A                |
| anti-HMGCR                                                     | 0 (0.00)          | 0 (0.00)          | N/A               | 1 (1.15)                      | N/A                |
| <b>Myositis Associated Autoantibody (MAA) [n=positive(%)]:</b> |                   |                   |                   |                               |                    |
| anti-PmScl 75                                                  | 0 (0.00)          | 1 (9.09)          | N/A               | 5 (5.75)                      | N/A                |
| anti-Ro52 <sup>^</sup>                                         | 0 (0.00)          | 0 (0.00)          | N/A               | 2 (2.30)                      | N/A                |
| anti-U1RNP                                                     | 0 (0.00)          | 0 (0.00)          | N/A               | 3 (3.45)                      | N/A                |
| Unknown bands                                                  | 2 (20.00)         | 1 (9.09)          | N/A               | 8 (9.20)                      | N/A                |
| Negative                                                       | 1 (10.00)         | 2 (18.18)         | N/A               | 23 (26.44)                    | N/A                |
| Not Done                                                       | 0 (0.00)          | 0 (0.00)          | N/A               | 2 (2.30)                      | N/A                |
| <b>ANA* [n=positive(%)]:</b>                                   | <b>4 (40.00)</b>  | <b>6 (54.55)</b>  | <b>N/A</b>        | <b>43 (55.84)<sup>^</sup></b> | <b>N/A</b>         |

# 6 RNA-seq samples were paired

\*Physical Global Assessment (PGA) [0-10] (2.65% of samples missing data), Childhood Myositis Assessment Scale (CMAS) [0-53] (19.47% of samples missing data),

Creatine Kinase (CK) [U/L - >0 measured in serum] (15.92% of samples missing data)

<sup>^</sup>2 patients were positive for both anti-MDA5 and anti-Ro52

~MSA/MAA method - Immunoprecipitation (70.11%), Extended myositis Immunoblot, RUH, Bath (26.44%), Extended Myositis Immunoblot, RMCH, Manchester (1.15%), Not done (2.30%)

ANA\* - data for ANA result missing in n=5 patients
