# Supplementary material for: Role of CD14+ monocyte-derived oxidised mitochondrial DNA in the inflammatory interferon type 1 signature in juvenile dermatomyositis
Source: PubMed Central journal article supplement (PMC10176342; doi:10.1136/ard-2022-223469), 2022-12-23
Supplement: ard-2022-223469supp006.pdf [file ard-2022-223469supp006.pdf]

## 1 **Methods**

### 2 ***Patient information***

3 Patients who met the Bohan and Peter criteria for probable or definite JDM were  
4 included in this study, with a median age of 7 years at time of sample, recruited  
5 through the UK JDM Cohort and Biomarker Study (JDCBS)<sup>33–35</sup>. Inclusion in the  
6 JDCBS is offered to all patients with JDM seen in the 17 contributing centres. 99% of  
7 families consent to being in this observational study, which had 660 cases at time of  
8 this investigation; 6 have declined in >20 years. The 90 patient cases used in this  
9 study were consecutive cases available for analysis that were representative of the  
10 whole cohort (74 unique cases in functional experiments, 8 unique cases in the  
11 RNAseq experiments and 8 cases in both functional experimental and RNAseq  
12 experiments). In addition, 39 age-matched child healthy controls (controls) were  
13 recruited through the Centre for Adolescent Rheumatology. Parents and patients  
14 gave written informed consent or age-appropriate assent. The study had full ethical  
15 approval through London-Bloomsbury and North-East Yorkshire Research Ethics  
16 Committees (MREC 01/3/022). Controls samples were donated under the North  
17 Harrow ethics committee approval (REC 11/0101). All consent was obtained in  
18 accordance with the Declaration of Helsinki. Patient and control demographics are  
19 summarised in Table 1: number of participants, age at onset, diagnosis and at  
20 sample collection were collated for medications, Physicians Global Assessment  
21 (PGA; range 0–10; low scores indicate minimal disease)<sup>36,37</sup>, Childhood Myositis  
22 Assessment Scale (CMAS; range 0–52; high scores indicate no weakness)<sup>38</sup>, serum  
23 creatine kinase levels (U/l), medications at time of sample (oral steroids,  
24 methotrexate, ciclosporin, azathioprine, cyclophosphamide and hydroxychloroquine),  
25 myositis specific autoantibody (MSA) status, myositis associated autoantibody (MAA)  
26 status and anti-nuclear autoantibody (ANA) status (Table 1).

27

### 28 ***PBMC isolation***

29 Peripheral blood mononuclear cells (PBMC) were isolated by density centrifugation  
30 using Lymphoprep (Stemcell technologies, Cat# 07851/07861). PBMC were stored  
31 in 90% Fetal Bovine Serum (FBS) (Gibco, cat# 10270-106) and 10% Dimethyl-  
32 sulfoxide (DMSO) (Sigma, Cat# D2650-5x10ml, CAS: 67-68-5) and cryopreserved in  
33 liquid nitrogen until use. For some assays PBMC were used fresh, as indicated.

34

35 **Cell sorting and RNA preparation**

36 Patient and control CD4+, CD8+, CD19+ and CD14+ cells were sorted by flow  
37 cytometry (FACS Aria III). DAPI was used to exclude dead cells. Sorted cell RNA  
38 was extracted using the PicoPure™ RNA Isolation Kit (Thermo Fisher Scientific,  
39 Cat# KIT0204).

40

41

42 **Library preparation**

43 Library preparation and sequencing were performed at UCL Genomics. Samples  
44 were processed using Illumina's TruSeq Stranded mRNA LT sample preparation kit  
45 (p/n RS-122-2101) according to manufacturer's instructions with minor alterations.  
46 Briefly, mRNA was isolated from 250 ng total RNA using Oligo dT beads to pull down  
47 Poly-Adenylated transcripts. The purified mRNA was fragmented using chemical  
48 fragmentation (heat and divalent metal cation) for 10 minutes and primed with  
49 random hexamers. Strand specific first strand cDNA was generated using Reverse  
50 Transcriptase and Actinomycin D. This allows for RNA dependent synthesis while  
51 preventing spurious DNA-dependent synthesis. The second cDNA strand was  
52 synthesised using dUTP in place of dTTP, to mark the second strand. The resultant  
53 cDNA is then "A-tailed" at the 3' end to prevent self-ligation and adapter dimerisation.  
54 Full length TruSeq adaptors, containing a T overhang are ligated to the A-Tailed  
55 cDNA. These adaptors contain sequences that allow the libraries to be uniquely  
56 identified by way of a 6 bp Index sequence. Successfully ligated fragments were  
57 enriched with 14 cycles of PCR. The polymerase is unable to read through uracil, so  
58 only the first strand is amplified, thus making the library strand specific.

59

60 **RNA Sequencing**

61 Libraries to be multiplexed in the same run were pooled in equimolar quantities,  
62 calculated from Qubit and Bioanalyser fragment analysis. Samples were sequenced  
63 on the NextSeq 500 instrument (Illumina, San Diego, US) using a 43 bp paired end  
64 run resulting in >15million reads per sample.

65

66 **RNA Sequencing analysis**

67 Run data were demultiplexed and converted to fastq files using Illumina's bcl2fastq

68 Conversion Software v2.16. Sequencing reads (in fastq format) were aligned to the  
69 GRCh38 reference sequence using TopHat v2.1.0<sup>39</sup>. Alignments were processed  
70 using samtools version 1.2 and Picard tools version 1.140  
71 (<http://picard.sourceforge.net/>)<sup>40</sup>. Aligned reads were filtered for mapq  $\geq 4$ , i.e.  
72 uniquely mapping reads, and putative PCR duplicates were removed. Read  
73 summarization was performed using featureCounts<sup>41</sup>. Expression analysis was  
74 carried out using R version 3.2.2<sup>42</sup>, and differential gene expression was analysed  
75 using edgeR<sup>43</sup>. RNAseq data are available from ArrayExpress, accession number  
76 E-MTAB-5616.

77

### 78 **Gene Set Enrichment Analysis**

79 GO term and pathway enrichment analysis was carried out using 'goseq' which uses  
80 a test based on the Wallenius' noncentral hypergeometric distribution<sup>44</sup>. Gene set  
81 enrichment analysis was carried out with "Hallmark" gene sets from databases<sup>45</sup>  
82 based on calculated normalised enrichment scores (NES) and multiple adjusted p-  
83 values (q-values) were calculated. Gene scores were established for IFN type 1  
84 (*Ly6E*, *MX1*, *USP18*, *RSAD2*, *OAS1*, *IFFI44L*, *IFI27*, *ISG15*, *IFIT1*, *IFI44*, *IFI6*,  
85 *SIGLEC1*, *IFIT3*, *IRF7*, *STAT1* [15 genes]) and mitochondrially encoded-genes (*MT-*  
86 *ND1*, *MT-ND2*, *MT-ND3*, *MT-ND4*, *MT-ND4L*, *MT-ND5*, *MT-ND6*, *MT-CO1*, *MT-CO2*,  
87 *MT-CO3*, *MT-CYB*, *MT-ATP6*, *MT-ATP8* [13 genes]).

88

### 89 **Flow cytometry**

90 Frozen PBMC were used for all flow cytometry analysis. After thawing, PBMC were  
91 plated in a 96 well plate at 200,000 per well, washed with 1xPBS and incubated with  
92 Live/Dead fixable cell stains (Life Technologies) according to manufacturer's  
93 instructions. For extracellular staining, antibodies to surface proteins (see Methods  
94 table 2) were diluted in FACS buffer (500ml 1x PBS (Sigma Aldrich), 1%FBS, 0.01%  
95 sodium azide) and cells were incubated at 4°C for 20 minutes with appropriate  
96 antibody cocktails. Samples were either fixed with intracellular fixation buffer  
97 (eBioscience™ Intracellular Fixation & Permeabilization Buffer Set, Thermo Fisher  
98 Scientific, Cat# 88-8824-00) for 20 minutes at 4°C or for MitoTracker and MitoSox  
99 stains were incubated for 30 minutes at 37°C with the respective mitochondrial dyes  
100 in 1x PBS (Methods table 2) and left unfixed. For intra-cellular staining the PBMC  
101 were washed with permeabilization buffer and then incubated in the presence of

102 intracellular markers for 30 minutes at 4°C. The samples were washed in FACS  
 103 buffer and run on BD LSR II Flow Cytometer (BD Biosciences) or on CytoFLEX Flow  
 104 Cytometer (Beckman Coulter Life Sciences).

105

106 For the 2NBDG assay PBMC were stained with surface markers (as above) and then  
 107 stained with the fluorescent tagged glucose tracer, 2NBDG (2-(N-(7-Nitrobenz-2-oxa-  
 108 1,3-diazol-4-yl)Amino)-2-Deoxyglucose) according to manufacturer's instructions (2-  
 109 NBDG Glucose Uptake Assay Kit, Abcam, Cat# Ab235976).

110

111 **Methods table 2 – Antibodies and dyes used for flowcytometry, fluorescence**  
 112 **microscopy and dot blot western**

| Antibody                               | Company       | Catalogue and PRID                    |
|----------------------------------------|---------------|---------------------------------------|
| GLUT 1 monoclonal anti-human           | Invitrogen    | Cat#MA5-11315;<br>PRID: AB_2809254    |
| Goat anti-mouse IgG (H+L), AF488       | Invitrogen    | Cat# A11001;<br>PRID: AB_2534069      |
| GLUT 4 monoclonal anti-human           | Invitrogen    | Cat# PA5-23052;<br>PRID: AB_11153908  |
| Goat ant-rabbit IgG (H+L), AF555       | Invitrogen    | Cat# A21428;<br>PRID: AB_2535849      |
| CD3 anti-human monoclonal, PerCP-cy5.5 | eBioscience   | Cat# 45-0037-42;<br>PRID: AB_10548513 |
| CD4 anti-human monoclonal, APC-cy7     | BioLegend     | Cat# 317418;<br>PRID: AB_571947       |
| CD8 anti-human monoclonal, BV421       | BioLegend     | Cat# 301036;<br>PRID: AB_10960142     |
| CD19 anti-human monoclonal, Pe-cy7     | BioLegend     | Cat# 302216;<br>PRID: AB_314246       |
| CD14 anti-human monoclonal, AF700      | BioLegend     | Cat# 367114;<br>PRID: AB_2566716      |
| CD16 anti-human monoclonal, BV711      | BioLegend     | Cat# 367114;<br>PRID: AB_2563802      |
| HLA-DR anti-human monoclonal, BV510    | BioLegend     | Cat# 307646;<br>PRID: AB_2561948      |
| CD8 anti-human monoclonal, AF700       | BioLegend     | Cat# 344724;<br>PRID: AB_2562790      |
| CD3 anti-human monoclonal, BUV395      | BD Bioscience | Cat# 563546;<br>PRID: AB_2744387      |
| CD19 anti-human monoclonal, BUV805     | BD Bioscience | Cat# 749173;<br>PRID: AB_2873553      |
| CD4 anti-human monoclonal, Pe-cy7      | BioLegend     | Cat# 317414;<br>PRID: AB_571959       |
| CD14 anti-human monoclonal, BV421      | BioLegend     | Cat# 301830;<br>PRID:AB_10959324      |

|                                                                      |                         |             |
|----------------------------------------------------------------------|-------------------------|-------------|
| TO-PRO-3 Iodide (642/661)-<br>1mM solution in DMSO                   | ThermoFisher Scientific | Cat# T3605  |
| LIVE/DEAD™ Fixable Blue<br>Dead Cell Stain Kit, for UV<br>excitation | ThermoFisher Scientific | Cat# L23105 |

113

114 **Citrate synthase activity assay**

115 CD14<sup>+</sup> Monocytes were isolated from PBMC by positive selection (EasySep™  
 116 human CD14 positive selection kit II – Stemcell - 17858). The monocyte cell pellet  
 117 was spun down (1000xg, 5 minutes), supernatant removed. Monocyte cell pellet was  
 118 stored in -80°C freezer. All samples were thawed and re-suspended in 50µl of citrate  
 119 synthase (CS) buffer (1L at pH 8.0: 12.011g Trizma base, 990ml of ddH<sub>2</sub>O and 1ml  
 120 of Triton x100). Assay carried out at 37°C in Uvikon XL spectrophotometer, pre-  
 121 warmed to correct temperature. Spectrophotometer set up to measure 'aurate  
 122 assay'; absorbance 412nm; one measurement per 0.5 min; set cell changer mode to  
 123 6S/6R; autozero on. Pre-warmed citrate synthase (CS) assay buffer to 37°C and  
 124 keep warm throughout experiment. To each 1.5ml polystyrene cuvette for sample:  
 125 10µl 5,5'-dithio-bis-(2-nitrobenzoic acid) (DTNB; 20mM), 10µl Acetyl-CoA (10mM),  
 126 20µl sample homogenate and 950µl CS assay buffer. For reference cuvette: 10µl  
 127 DTNB (20mM), 10µl Acetyl-CoA (10mM), and 960µl CS assay buffer. Cuvette  
 128 inverted to mix. Assay run for 2 minutes to confirm flat baseline. 10µl oxaloacetate  
 129 (20mM) added, cuvette inverted to mix and assay run for another 8 minutes. Protein  
 130 content quantified against standard curve using Bradford assay (Pierce™  
 131 Coomassie (Bradford) Protein Assay Kit-23200) measured by Tecan F200 plate  
 132 reader, with i-control 2.0 Tecan software, at 600nm absorbance. The calculation of  
 133 CS activity is derived from the Beer-Lambert law:  $A = c * \epsilon * l$ , where A is the  
 134 measured absorbance, c is the sample concentration,  $\epsilon$  is the molar extinction  
 135 coefficient of 2-nitro-5-thiobenzoate (TNB ( $13.6 \times 10^3 \text{ M}^{-1} \text{ cm}^{-1}$ ) and l is the path length  
 136 (1cm cuvettes). CS activity expressed as nmol/min/mg protein.

137

138 **Imaging**

139 Live cell imaging was performed on a Zeiss Observer 7 microscope with a 63xNA1.4  
 140 Oil objective and Hamamatsu Flash 4 camera. PBMC were stained with CD14+  
 141 (APC) in FACS buffer for 20 minutes and then with MitoTracker and MitoSox,  
 142 incubated for 30 minutes at 37°C with the respective mitochondrial dyes in 1x PBS

143 (Methods table 1) and left unfixed. PBMC were suspended in FACS buffer in 96-well  
 144 glass bottom imaging plates with a #1.5 coverslip base. LED illumination at 470nm,  
 145 555nm or 630nm with single band filters at (CD14 APC, MitoTracker green  
 146 (excitation/emission 490/516nm) MitoSox (excitation/emission 510/580 nm) were  
 147 used to take z-stacks at Nyquist sampling in xy & z for deconvolution with SVI  
 148 Huygens software. Exposure times (20ms) and illumination intensity were kept to  
 149 minimal levels to avoid phototoxicity and allow rapid imaging of each cell. Typically  
 150 500 grey levels (on a 16 bit detector) were used for each channel. Individual cells  
 151 were manually cropped using Zen2.3 software, deconvolved (SVI Huygens), then  
 152 processed with in house macros (GitHub) to measure within a cropped spheroid  
 153 around each cell the volume & surface area of each stain (MitoTracker and MitoSox)  
 154 and regions of overlap. 3D model images were created using Imaris cell imaging  
 155 software (Oxford instruments).

156

### 157 **Methods table 3 – Antibodies and dyes used for fluorescence microscopy**

158

| Antibody                        | Company                 | Catalogue and PRID             |
|---------------------------------|-------------------------|--------------------------------|
| CD14 anti-human monoclonal, APC | BioLegend               | Cat# 325608;<br>RRID:AB_830681 |
| MitoTracker green               | ThermoFisher Scientific | Cat# M7514                     |
| MitoSox red                     | ThermoFisher Scientific | Cat# M36008                    |

159

### 160 ***Incubation of monocytes with [U-<sup>13</sup>C<sub>6</sub>]glucose***

161 CD14+ monocytes were isolated from PBMC by positive selection (EasySep™  
 162 human CD14 positive selection kit II – Stemcell - 17858). 0.5 million CD14+  
 163 monocytes were cultured in 1ml per well glucose starved media (Gibco™ DMEM, no  
 164 glucose, Fisher scientific, cat# 11520416) plus 3mM glucose (D-(+)-Glucose, Sigma-  
 165 Aldrich, #G8270-100G) over-night in a 24 well plate. The medium was changed to  
 166 1ml per well DMEM plus [U-<sup>13</sup>C<sub>6</sub>]glucose (10mM) (D-glucose (U-13C<sub>6</sub>,99%),  
 167 Cambridge isotope laboratories, Inc, Cat# CLM-1396-1). 1ml mineral oil was layered  
 168 on top of the cell suspension to trap gas release. Every hour for six hours and a  
 169 further 24hr time point a 100µl and 10µl media samples were taken and stored  
 170 before analysis for <sup>13</sup>CO<sub>2</sub> and <sup>13</sup>C lactate.

171

### 172 ***<sup>13</sup>CO<sub>2</sub> Gas Chromatography-Isotope ratio mass spectrometry***

173 Samples in 12ml Exetainer Tubes (Labco Ltd) were thawed at room temperature,  
174 and 100µl 1M hydrochloric acid was injected through the septum into each vial to  
175 release CO<sub>2</sub> from the medium. Vials were centrifuged for 30s at 500xg. Samples  
176 were then analysed on a GasBench II coupled to a Thermo Delta-XP isotope-ratio  
177 mass spectrometer (Thermo-Finnigan, Bremen, Germany). Ten repeat injections  
178 were carried out per sample, with <sup>13</sup>CO<sub>2</sub>/<sup>12</sup>CO<sub>2</sub> ratios measured against Vienna Pee  
179 Dee Belemnite (VPDB) using a calibrated CO<sub>2</sub> reference gas. Following this,  
180 <sup>13</sup>CO<sub>2</sub>/<sup>12</sup>CO<sub>2</sub> ratios were then converted to mole percent excess using absolute  
181 molar ratio of <sup>13</sup>C to <sup>12</sup>C (0.0111796) in VPDB. The change in mole percent excess  
182 was then converted to pmol <sup>13</sup>CO<sub>2</sub> generated using the volume of medium and  
183 concentration of bicarbonate (2.9 mM) present, which was then corrected for the  
184 number of labelled carbon atoms (6 for glucose) to obtain picomoles of substrate  
185 oxidised <sup>46</sup>.

186

#### 187 **Lactate Gas Chromatography Mass Spectrometry**

188 Samples were defrosted; 10-50µl sample +25µl internal standard (1mM <sup>13</sup>C<sub>4</sub>-beta  
189 hydroxybutyrate (BOHB)) plus 225µl of acetonitrile were mixed in an 1.5ml  
190 microcentrifuge tube. The samples were vortexed, and spun in a microcentrifuge for  
191 5 minutes at 15,000xg. Supernatant was transferred to a GC vial and dried down  
192 under N<sub>2</sub> gas at room temperature. For the standards (100-1µM): 50µl standard  
193 (<sup>13</sup>C<sub>3</sub>-lactate) +25µl internal standard (1mM <sup>13</sup>C<sub>4</sub> BOHB) were added to a GC vial.  
194 Dried down under N<sub>2</sub> gas at room temperature. To ensure all water was removed,  
195 200µl of 100% ethanol was added, and dried down under N<sub>2</sub> gas at room  
196 temperature. To each vial, 30µl of ethyl acetate + 30µl of  
197 Bis(trimethylsilyl)trifluoroacetamide /10% trimethylsilyl chloride was added. Samples  
198 and standards were vortexed and incubated for 30 minutes at 37°C on a heat block.  
199 The samples and standards were analysed by GC/MS (Thermo DSQII trace Ultra  
200 GC) using a RXI-5Sil MS fused silica (30m x 0.25mm I.D, 0.25µm film thickness)  
201 column (Thames Restek) at a helium flow rate of 1.2ml/minute. 2µl of sample was  
202 injected into the inlet (250°C) with a split ratio of 1:8 using the following temperature  
203 programme: 60°C hold for 1 minute, 140°C increased at a rate of 10°C/minute,  
204 240°C at a rate of 40°C/minute. Ionisation mode was positive chemical ionisation  
205 with methane at 2ml/minute. The detection mode used was Selected Ion Monitoring

206 (SIM), collecting peak-area data on the following ions: Lactate (m/z 219),  $^{13}\text{C}_3$ -  
207 lactate (m/z 222), and  $^{13}\text{C}_4$ -BOHB (internal standard) (m/z 237). The sample  
208 concentrations were calculated against a standard curve of peak area ratio 222/237.  
209 Method was modified from <sup>47</sup>.

210

### 211 ***Mitochondria isolation and western/dot blot assay***

212 CD14+ Monocytes were isolated from PBMC by positive selection (EasySep™  
213 human CD14 positive selection kit II, Stemcell, cat#17858) and then mitochondria  
214 were isolated from monocytes using Mitochondria Isolation Kit for Cultured Cells  
215 (Thermo Fisher, cat#89874). Samples were prepared by diluting with 4x loading dye.  
216 PVDF membrane strips were prepared in Methanol for 1-2 minutes. Membranes  
217 were blotted and sample mix was applied in dots and left to dry for an hour. The  
218 membrane was blocked with 5% skimmed milk in PBST for an hour. The membrane  
219 was incubated with the antibody (8-OHdG – Santa Cruz – cat#sc-393871) in 5ml of 5%  
220 skimmed milk in 0.1%PBST for an hour/overnight. Membrane was washed with 5ml  
221 of 5% skimmed milk in 0.1%PBST. The membrane was incubated with the  
222 secondary antibody (rabbit anti-mouse 1:1000) in 5ml of 5% skimmed milk in 0.1%  
223 PBST for an hour. Membranes washed with 0.1%PBST. Substrate was applied to  
224 the membrane (ECL™ Prime Western Blotting System, Merck, Cat# RPN2232),  
225 image was recorded and analysed (Quantity One 1-D analysis software, Bio-rad,  
226 RRID:SCR\_014280).

227

### 228 ***MT-CO3 plasmid transformation***

229 100µl XL 10-Gold® Ultracompetent cells (Stratagene, Cat#200314) were thawed on  
230 ice and put into a new RNA/DNA free Eppendorf. 4µl of mercaptoethanol was added  
231 to the bacteria cells and incubated on ice for 10 minutes. Next, 1µl of 70ng/µl  $10^{10}$   
232 *Mt-CO3* plasmid was added to the sample, mixed and incubated on ice for 30  
233 minutes. Then the sample was heat shocked at 42°C for 30 seconds and 900µl LB  
234 broth was added. The sample was then incubated for 1 hour at 37°C and shaken at  
235 300rpm. To grow the cells, 200µl of the sample was spread over an agar plate  
236 (containing LB agar and 100mg/ml ampicillin), the plate was sealed and incubated at  
237 37°C overnight. 3 cell populations were picked from the agar plate and added to 5ml  
238 of LB broth in a 50ml falcon which was incubated and shaken at 37°C overnight.



239

**240 Mitochondrial DNA amplification by qPCR**

241 MT-CO3 sequence was amplified by PCR insertion of DNA molecule containing MT-  
242 CO3 into plasmid vector. The plasmid vector was diluted to a known concentration of  
243  $10^{10}$  copy standard with the template containing  $10^{10}$  copies per  $5\mu\text{l}$ . The plasmid  
244 vector sample was serially diluted to 1:10 to make standards down to  $10^0$ . Myoblast  
245 genomic DNA was used as a non-template control (NTC) and was made to a  
246 concentration of  $63.4\text{ng}/\mu\text{l}$  in  $200\mu\text{l}$ . From this the NTC was made up as 2x  $1350\mu\text{l}$  of  
247  $0.5\text{ng}/\mu\text{l}$  ( $675\text{ng}$  in  $1350\mu\text{l}$ ). The positive control was diluted 1:10 and 1:100 (neat  
248 gives Ct ~ 21, 1:10 gives Ct ~ 24, 1:100 gives Ct ~ 27). DNA from the plasma  
249 samples, JDM and control, were extracted using Norgen Biotek kit Plasma/Serum  
250 RNA Purification Mini Kit (Norgen Biotek Corp, Cat#55000)– these were eluted in a  
251 minimal volume ( $25\mu\text{l}$ ),  $5\mu\text{l}$  used per reaction.  $20\mu\text{l}$  of the PCR master mix was  
252 pipetted into each well;  $5\mu\text{l}$   $\text{dH}_2\text{O}$ ,  $1.25\mu\text{l}$   $5\mu\text{M}$  forward primer (5'-  
253 CCTTCACCATTTCGACGGCAT),  $1.25\mu\text{l}$   $5\mu\text{M}$  reverse primer (5'-  
254 ACGTGAAGTCCGTGGAAGCC),  $12.5\mu\text{l}$  iQ™ SYBR® Green Supermix (BioRad,  
255 Cat# 170-8882).  $5\mu\text{l}$  of NTC, standard or sample was added to each well plus  $20\mu\text{l}$   
256 master mix. Thermo cycling programme used:  $95^\circ\text{C}$  for 5 minutes, 44 cycles of:  $95^\circ\text{C}$   
257 for 15 seconds,  $63^\circ\text{C}$  for 60 seconds, hold 63 degrees for 3 minutes. Melt curve;  
258 start at  $68^\circ\text{C}$ , increase by increments of  $0.5^\circ\text{C}$  for 30 seconds to  $95^\circ\text{C}$ . CFX Maestro  
259 software (RRID:SCR\_018057) was used to analyse qPCR data against the standard  
260 curve to quantify MT-CO3 copy number per volume of plasma sample.

261

**262 Oxidised mitochondrial DNA reagent generation**

263 Whole blood was collected into EDTA, lysed, and DNA was purified using  
264 UltraPure™ Phenol:Chloroform:Isoamyl Alcohol (25:24:1, v/v) (ThermoFisher  
265 Scientific, cat#15593031) and precipitated using ethanol (method previously  
266 described)<sup>48</sup>. Amplification of the DNA sample generated two long PCR amplicons  
267 (9.1kb and 11.2kb) spanning the entire mtDNA genome using PCR primers MTL-1/2  
268 (*MTL-F1* 5'-AAAGCACATACCAAGGCCAC, *MTL-R1* 5'-  
269 TTGGCTCTCCTTGCAAAGTT, *MTL-F2* 5'-TATCCGCCATCCCATACATT, *MTL-R2*  
270 5'-AATGTTGAGCCGTAGATGC (Merck)).  $10\mu\text{l}$  of human genomic DNA per  $200\mu\text{l}$   
271 PCR tube,  $40\mu\text{l}$  PCR master mix per  $200\mu\text{l}$  PCR tube ( $5\mu\text{l}$  10X LA PCR Buffer II

272 (25mM MgC<sub>2</sub>), 2µl 10µM forward primer (MTL-F1, MRL-F2), 2µl 10µM reverse  
273 primer (MTL-R1, MRL-R2), 8µl 2.5mM dNTP mix, 22.5µl nuclease free water, 0.5µl  
274 TaKaRa LA Taq (5U/µl) (TaKaRa LA Taq® DNA Polymerase (Mg<sup>2+</sup> free buffer),  
275 TaKaRa, Cat# RR002A). Sample ran on pre-programmed thermal cycler.  
276 Programme: pre-heat lid set to 100°C. 94°C for 5 minutes. 30 cycles of; 98°C for 15s,  
277 68°C for 10s 9slow ramp from 68°C to 60°C at 0.2°C per second), 60°C for 15s,  
278 68°C for 11 minutes. 72°C for 10 minutes. Hold at 10°C. Amplicons of mtDNA were  
279 purified from residual primers and dNTPs by MSB Spin PCRapace (B-Bridge  
280 International). The DNA samples were quantified using a nanodrop, and agarose gel  
281 run with 1kb plus DNA ladder (BioLabs inc.). The mtDNA samples were oxidised  
282 using the oxidation method: 3µl of H<sub>2</sub>O, 50µl mtDNA (500µg) in phosphate buffer  
283 (100mM 1M K<sub>2</sub>HPO<sub>4</sub> and 1M KH<sub>2</sub>PO<sub>4</sub> pH 7.4), 42µl 2.4mM CrCl<sub>3</sub>, 6µl H<sub>2</sub>O<sub>2</sub> (1:1000)  
284 (Merck, Cat# 230723-100G). The mix was incubated at 37°C for 2hr in water bath.  
285 To precipitate the mtDNA, 10µl sodium acetate (3M, pH5) and 200µl of -20°C 100%  
286 ethanol (ETOH) was added to the mtDNA sample and incubated at -20°C for 10  
287 minutes. The sample was spun at 13,000xg at 4°C for 10 minutes, then the  
288 supernatant was discarded. 500µl of 70% ETOH was added to the remaining mtDNA  
289 pellet. The sample was spun again at 13,000xg at 4°C for 10 minutes, then the  
290 ETOH was removed. The sample pellet was spun again at 13,000xg at 4°C for 10  
291 minutes to dry. The mtDNA sample was re-suspended in DNA/RNA free ddH<sub>2</sub>O at  
292 the required concentration. To confirm the mtDNA was oxidised, the oxmtDNA  
293 samples were quantified for oxidation using HT 8-oxo-dG ELISA kit II (Bio-technie  
294 R&D systems, Cat# 4380-096-K) according to manufacturer's instructions.

295

### 296 ***Oxidised mitochondrial DNA culture***

297 PBMC were thawed and re-suspended in RPMI medium 1640 (Gibco, cat# 21875-  
298 034), supplemented with 10% FBS and 1% penicillin streptomycin (Pen Strep, Gibco,  
299 Cat# 15140-122). 0.2M thawed PBMC were cultured with either; RPMI medium  
300 (unstimulated or untreated control), IFN-α (1000U/ml – R&D – Cat#11100-1-5UM),  
301 oxidised/non-oxidised mtDNA (4µg/ml) with LL37 (InvivoGen, Cat#tlrl-l37), with or  
302 without cGAS inhibitor (G140) (1mM) (InvivoGen, Cat# inh-g140), TLR-9 antagonist  
303 (ODN TTAGGG (A151)) (5mg/ml - 1:500 dilution) (InvivoGen, Cat#tlrl-ttag151) or N-  
304 acetyl-L-cysteine (7.5mM) (Sigma Aldrich, Cat#A7250-5G) added 24hr into the

305 culture with oxidised mtDNA for a further 24hr. PBMC prepared for RNA extraction  
306 and isolation using the PicoPure™ RNA Isolation Kit (Thermo Fisher Scientific, Cat#  
307 KIT0204). Nanodrop quantification; all samples diluted to the same concentration  
308 with ddH<sub>2</sub>O (RNA/DNA free) to make 10µl of RNA. cDNA generated using iScript™  
309 cDNA synthesis kit (Bio-Rad, Cat#1708891) according to manufacturer's instructions.  
310

### 311 **Gene expression analysis by qPCR**

312 qPCR was run for 3 genes; *PPIA* (House keeper), *MX1* and *RSAD2*  
313 (Hs99999904\_m1 *PPIA*, Hs00895608\_m1 *MX1*, Hs00369813\_m1 *RSAD2*, TaqMan  
314 gene Expression Assay (FAM), Applied Biosystems™, Cat#4331182). Master mix  
315 per well (16µl): 1µl primer, 5µl dH<sub>2</sub>O, 10µl master mix (TaqMan™ fast advanced  
316 master mix, Applied Biosystems™, Cat#4444557). 16µl of the master mix was added  
317 to 4µl cDNA sample. Thermo cycler programme: 50°C for 2 minutes, 95°C for 10  
318 minutes 39 cycles of: 95°C for 15 seconds, 60°C for 60 seconds, plate read. Analysis  
319 by Bio-Rad CFX Maestro software. Gene expression normalised to house keeper  
320 (*PPIA*) by dCT, normalised to experimental control by ddCT and expressed as power  
321 of control.

322

### 323 **Statistics**

324 RNA-seq expression analysis was carried out using R version 3.2.2<sup>42</sup>, and  
325 differential gene expression was analysed using edgeR<sup>43</sup>. GO term and pathway  
326 enrichment analysis was carried out using 'goseq' which uses a test based on the  
327 Wallenius' noncentral hypergeometric distribution<sup>44</sup>. Gene set enrichment analysis  
328 (GSEA) was carried out with "Hallmark" gene sets from databases<sup>45</sup> based on  
329 calculated normalised enrichment scores (NES) and multiple adjusted p-values (q-  
330 values) were calculated. For the imaging data analysis of the effect of JDM versus  
331 health control as a fixed effect in a linear mixed effects model, with a random effect  
332 included to account for individual-specific effects. For each outcome, models were  
333 built sequentially starting with an intercept-only model with a random effect for  
334 individual, followed by an otherwise identical model with the outcome log- or square  
335 root-transformed as appropriate, followed by the addition of disease status as a fixed  
336 effect. P-values were generated using nested ANOVA. All other statistics were  
337 performed using Prism 9. Bar charts shown with median values and whole range.

338 For parametric data, t-test or one-way ANOVA with Tukey's multiple comparison  
339 were used to calculate significance. For non-parametric data Mann-Whitney test or  
340 Kruskal-Wallis test with Dunn's multiple comparisons were used to calculate  
341 significance. Pearson's correlation test was used to calculate correlation among  
342 variables of interest, significance and r-value.  
343
